# Supplementary material for: Integrative Analysis of Epigenome and Transcriptome Data Reveals Aberrantly Methylated Promoters and Enhancers in Hepatocellular Carcinoma
Source: Front Oncol. 2021 Nov 10;11:769390. doi: 10.3389/fonc.2021.769390 (PMC8631276; doi:10.3389/fonc.2021.769390)
Supplement: Supplementary file 2 [file DataSheet_2.xlsx]

## Sheet: Table S1.1
Table S1.1 The clinical phenotype information of all 33 HCC patients in the present study
Patient ID	Gender	Age	Smoking	Alcohol	HBV	HBV DNA	Differentiation	Tumor size	AFU	AFP	CEA	ALT	AST	AKP	GLT
1	female	70	non-smoking	drinking	non-infected	999	moderate	22.5	26	1.3	NA	6	19	129	35
2	male	52	non-smoking	non-drinking	non-infected	999	low-to-moderate	22	23	28.5	2.8	11	15	75	24
3	female	45	non-smoking	non-drinking	non-infected	338000	moderate	48	19	21.2	NA	51	43	249	277
4	male	61	smoking	non-drinking	infected	429000	moderate	18	28	3.2	3.2	24	31	93	47
5	male	64	non-smoking	non-drinking	infected	376000	moderate	25.8	50	13171.3	NA	28	34	90	31
6	female	33	non-smoking	non-drinking	infected	999	low-to-moderate	35.75	40	506.8	0.9	28	28	128	41
7	female	57	non-smoking	non-drinking	infected	2000	moderate	20	29	8489.1	2.3	13	24	98	27
8	male	64	non-smoking	cessation	infected	1650	moderate	20	43	1516.1	NA	33	24	109	228
9	female	58	non-smoking	non-drinking	infected	4880	low	59.5	44	28.8	6	89	92	108	111
10	male	58	smoking	non-drinking	infected	1280000	low-to-moderate	30	45	675.9	6.5	100	75	84	58
11	male	72	smoking	cessation	non-infected	NA	low	80.5	30	4	2.2	21	19	83	40
12	male	72	smoking	drinking	non-infected	999	moderate	42	16	155.8	3.5	19	26	74	61
14	male	69	non-smoking	drinking	non-infected	999	moderate	9	24	0.9	3.3	12	12	114	56
15	male	51	non-smoking	non-drinking	infected	102000000	moderate	16	47	1502.5	3.3	37	37	83	22
16	male	62	smoking	non-drinking	infected	89800	moderate	18	36	1.7	5.1	37	36	58	36
19	male	34	non-smoking	non-drinking	infected	69500	low-to-moderate	52	32	80000	2.5	20	38	73	33
21	male	59	smoking	non-drinking	infected	9160000	moderate	22.5	32	127.3	1.3	33	28	133	30
22	male	59	non-smoking	non-drinking	infected	49800	low-to-moderate	7	34	23	1.4	45	41	109	69
23	male	78	cessation	drinking	infected	999	low-to-moderate	39	32	2.6	1.5	29	44	98	47
24	male	51	non-smoking	non-drinking	infected	9800	low-to-moderate	180	39	80000	2.3	12	22	164	196
25	male	60	smoking	drinking	non-infected	999	moderate	15.75	22	55.9	1.7	13	31	54	80
26	male	54	smoking	drinking	infected	999	moderate	51	23	140.8	9	33	29	91	61
27	male	61	smoking	drinking	infected	999	moderate	36	46	9.9	3.5	16	23	80	51
28	male	66	non-smoking	non-drinking	non-infected	999	moderate	30	39	48.1	NA	11	17	71	106
30	male	44	cessation	non-drinking	infected	999	moderate	88	73	73	1.6	36	52	65	147
31	male	71	cessation	cessation	infected	999	moderate	45	30	3.7	2.6	42	48	117	47
32	male	42	non-smoking	non-drinking	infected	999	moderate	18	43	3.2	1.3	113	51	79	29
33	male	66	non-smoking	non-drinking	infected	999	moderate	18	28	1.9	2	18	25	117	36
34	male	60	smoking	non-drinking	infected	25900	low	22.5	37	6.3	5.1	25	22	133	153
35	male	57	non-smoking	non-drinking	infected	999	moderate	10.5	19	402.8	1.9	20	19	86	26
36	female	65	non-smoking	non-drinking	infected	2820	low	13.5	27	1.2	2	19	20	94	25
37	male	50	non-smoking	non-drinking	infected	999	moderate	7	20	9623.1	3.8	26	24	56	20
40	male	66	non-smoking	drinking	non-infected	999	moderate	115	55	16	1	20	20	67	20

## Sheet: Table S1.2
Table S1.2 The alignment statistics of high-throughput sequencing experiments
Sample.ID	Total.WGBS.Reads	Clean.WGBS.ReadsRates	Unique.Mapping.Rates.WGBS	No.CpGs	Mean.Depth.WGBS	CleanReads.RNAseq	UniqueMappingRates.RNAseq	MultiMappingRates.RNAseq
10N	293875728	95.97	80.6	28088876	12.11	62642033	81.56	14.16
10T	287369208	96.25	81.1	28099704	11.75	64833983	86.84	9.34
11N	289102097	96.86	81.8	28134351	12.2	58901311	86.7	9.4
11T	291873880	96.38	80.5	28071396	11.64	72744279	87.87	8.01
12N	293033822	95.71	80.75	28188174	12.4	54300778	87.26	8.93
12T	307592883	96.36	81.75	28150374	12.58	64386787	85.8	9.71
14N	360772017	97.03	82.3	28341497	13.05	71922882	86.72	9.19
14T	349332445	97.04	83.05	28291680	13.4	79882070	86.92	8.65
15N	357314026	97.15	81.4	28204349	11.14	61425382	85.41	10.31
15T	367695895	96.65	82.1	28357362	15.05	57469718	83.45	12.61
16N	352509684	97.42	83	28304102	12.79	67222051	82.01	13.25
16T	360763737	97	83.3	28206616	12.98	65335208	87.79	7.55
19N	348168248	96.25	81.4	28280360	13.32	53153855	87.28	7.16
19T	323604965	95.5	79.85	28043645	12.34	63818721	92.7	3.12
1N	281650375	93.72	81.05	28095206	12.42	71289384	89.07	7.28
1T	285158577	94.59	81.9	28031328	12.15	83282047	90.25	5.95
21N	340704636	95.72	80.2	28237929	12.66	52047040	84.42	9.73
21T	323248318	94.49	79.45	28130844	12.3	61569723	91.5	3.1
22N	310869344	95.99	77.9	28125524	11.63	80944075	86.19	9.65
22T	321165595	95.78	80.7	28143047	12.21	97456174	91.96	3.5
23N	324758391	96.88	82.35	28341510	13.87	74001116	87	9.21
23T	294407548	95.17	80.1	28128045	11.91	68586145	87.59	7.23
24N	293834680	96.15	81.65	27800174	11.56	67076016	84.99	9.73
24T	298789241	95.57	80.7	28023474	12.04	69070680	89.23	6.48
25N	299173118	95.86	81.35	28183755	12.36	64631709	86.71	9.14
25T	312235404	96.15	81.75	28241788	12.72	68023334	89.67	5.8
26N	292936109	95.89	79.5	27970027	11.54	64848127	87.16	8.15
26T	293450551	94.59	79.05	27893907	11.51	78937690	88.11	7.01
27N	286713046	94.91	79.2	28144231	11.71	57247083	77.23	17.46
27T	283883600	94.67	79.5	27996997	11.5	61359475	80.61	14.47
28N	284335195	94.71	78.1	28179367	11.61	63370105	82.86	11.91
28T	294764258	94.06	79.3	27926769	11.46	65543245	85.12	10.54
2N	276790834	93.24	79.4	28018959	11.51	55627854	88.39	6.83
2T	287300520	94.19	80.9	28140312	12.11	72182103	88.82	7.44
30N	286272810	96.16	80.55	28165405	11.89	77238488	87.67	7.57
30T	340933207	96.81	83.6	28331950	14.7	46718900	87.97	7.34
31N	361578895	96.68	81.9	28416924	16.52	46961802	86.34	8.96
31T	324862984	96.7	82.5	28356818	13.86	52605458	87.43	7.4
32N	330226562	96.96	81.6	28339305	14.05	60474993	86.48	8.86
32T	338847931	96.74	82.45	28308874	14.56	54787045	89.32	5.92
33N	345937629	97.47	82.9	28330140	14.6	72277639	84.58	10.6
33T	330142075	97.07	82.85	28227221	13.82	59807342	88.14	7
34N	337014584	97.39	83.85	28201562	14.26	60562128	88.63	6.62
34T	330455887	97.17	84.25	28138849	14.38	54615108	86.48	9.08
35N	336904568	97.46	82.7	28258621	13.93	58254206	87.86	6.65
35T	329804059	97.92	83.15	28243148	13.29	51252842	86.29	9.05
36N	341141940	96.7	82.25	28242555	14.77	59802226	85.01	10.03
36T	333965954	97.41	83.9	28067162	13.89	52088360	86.36	8.31
37N	355972895	96.92	82.2	28346116	15.06	51578937	83.32	11.54
37T	347298809	96.59	82.25	28242242	14.46	65796516	87.63	7.12
3N	282764349	94.21	81.4	28092233	12.09	71141821	82.56	11.35
3T	283869897	94.15	81.55	27952172	11.64	64259581	85.75	10.45
40N	336888992	96.24	77.55	28291206	13.87	61592777	89.5	6.56
40T	341915468	96.02	77.95	28269199	13.65	70043828	88.66	6.64
4N	286390359	94.95	80.9	28207572	12.06	70068037	88.19	6.66
4T	286742092	95.04	81.75	28058829	11.75	76070257	86.57	9.1
5N	290163827	95.02	81.35	28073506	11.88	62894643	83.82	11.88
5T	289969557	95.58	81.95	28100497	12.2	64673972	84.41	10.37
6N	295348764	96.91	82.95	28099318	12.47	58981787	87.76	8.19
6T	313567468	97.41	84.25	28209653	13.67	70677036	88.7	7.27
7N	299009552	97.5	83.6	28040797	12.48	64025784	85.99	9.99
7T	297554255	96.59	82.45	28006374	12.38	57952560	83.11	12.91
8N	298132597	97.53	82.65	28244410	12.98	63700509	86.81	8.79
8T	314707509	97.18	83.55	28151261	12.95	70798349	89	6.97
9N	323111334	97.62	83.75	28243369	14.27	116753952	86.53	7.89
9T	291113869	96.7	82.6	28092990	12.38	63734632	88.04	7.71

## Sheet: Table S2.1.1
Table S2.1.1 Summarized information of promoter-like DMR-DEGs
DMR.ID	Delta.Methy	DM.Pvalue	PromoterLike.T	PromoterLike.N	PromoterLike.score	CpGIsland	gene_name	DEG.LFC	DEG.padj	distance	MethyandGene.rho	MehtyandGene.padj
chr6_28259107_28259723	0.269598	0	0	0	0	TRUE	NKAPL	-1.84851	8.2966e-10	0	-0.59	1.7e-07
chr6_160123711_160123896	0.227976	8.48485e-08	0	3	3	FALSE	SLC22A1	-2.54267	1.90109e-07	1922	-0.76	0
chr12_56300795_56301027	-0.15068	4.51515e-06	3	5	8	FALSE	CS	0.853401	8.5368e-10	403	-0.42	0.0011
chr17_5078091_5078855	0.210507	1.88485e-06	0	1	1	TRUE	ZFP3	-0.743587	0.0146887	0	-0.64	1.8e-08
chr19_2901759_2902227	-0.232473	1.67273e-06	1	2	3	TRUE	ZNF57	1.08789	0.00192228	861	-0.56	1.9e-06
chr2_27442051_27442802	0.231016	2.57576e-06	0	0	0	TRUE	KRTCAP3	-1.85012	5.05528e-05	0	-0.72	0
chr6_160122172_160122337	0.221883	3.52121e-06	0	3	3	FALSE	SLC22A1	-2.54267	1.90109e-07	383	-0.69	0
chr6_160122738_160123492	0.25032	1.27273e-07	0	4	4	FALSE	SLC22A1	-2.54267	1.90109e-07	949	-0.73	0
chr1_149938375_149938991	-0.295953	0	2	1	3	FALSE	MTMR11	1.65415	9.25946e-08	1506	-0.38	0.0019
chr1_204196042_204196193	-0.239703	2.42424e-08	0	0	0	FALSE	KISS1	0.947608	0.000879531	-293	-0.43	0.00031
chr1_210329769_210330232	-0.228304	0	2	4	6	FALSE	HHAT	1.23532	6.4162e-16	1517	-0.47	8.2e-05
chr10_17386395_17387833	-0.320838	3.0303e-08	1	0	1	FALSE	ST8SIA6-AS1	6.225	1.47696e-30	0	-0.65	3.1e-09
chr17_40288709_40289215	-0.2711	0	0	1	1	FALSE	CDC6	3.48955	1.94665e-44	1076	-0.75	0
chr2_174246937_174247350	-0.32579	1.81818e-08	2	3	5	FALSE	OLA1	0.982268	5.72431e-10	-1348	-0.65	6.6e-09
chr8_97277329_97278175	0.416339	0	0	0	0	TRUE	TSPYL5	-1.69764	8.11943e-11	0	-0.62	5.7e-08
chr8_103021961_103022140	-0.25998	6.06061e-09	2	3	5	FALSE	ATP6V1C1	1.27725	2.72813e-17	898	-0.56	1.9e-06
chr9_21993387_21994025.1	-0.404175	0	2	1	3	TRUE	CDKN2A	3.45586	1.48727e-28	-1276	-0.77	0
chr9_21995982_21996368	-0.277647	8.48485e-08	2	3	5	TRUE	CDKN2A	3.45586	1.48727e-28	681	-0.63	7e-08
chr9_33751609_33751911	-0.361033	0	2	2	4	FALSE	PRSS3	2.03727	6.25583e-05	1143	-0.49	2.6e-05
chr1_26862894_26863264	-0.259245	2.24242e-07	1	0	1	FALSE	SFN	5.30015	1.19335e-30	0	-0.69	0
chr1_145706961_145707345	-0.231936	0	3	4	7	FALSE	PDZK1	1.02802	6.74003e-08	-803	-0.62	6.1e-08
chr1_145708049_145708184	-0.193989	8.48485e-08	1	1	2	FALSE	PDZK1	1.02802	6.74003e-08	0	-0.68	0
chr1_150280454_150280788	-0.241106	6.06061e-09	2	4	6	FALSE	CIART	1.32093	5.09846e-06	-1755	-0.61	1.2e-07
chr1_153546807_153548049	-0.251415	1.0303e-07	0	0	0	FALSE	S100A3	2.64236	3.25305e-08	-1323	-0.38	0.0018
chr1_153548616_153549183	-0.250614	4.90909e-07	0	0	0	FALSE	S100A3	2.64236	3.25305e-08	-189	-0.52	1.5e-05
chr1_155243498_155243841	-0.19878	4.9697e-07	2	4	6	FALSE	GBA	1.7372	1.12591e-28	-858	-0.62	5.5e-08
chr1_156060878_156061169	0.150714	4.24242e-07	0	1	1	FALSE	RAB25	-1.64949	0.0167472	0	-0.55	1.6e-06
chr1_204196426_204197900	-0.175883	1.27273e-07	0	0	0	FALSE	KISS1	0.947608	0.000879531	0	-0.42	0.00047
chr1_205678038_205678577	0.197571	2.42424e-08	1	4	5	FALSE	SLC45A3	-1.02801	3.57244e-05	-1882	-0.33	0.0074
chr10_33004613_33004797	-0.216468	4.12121e-07	2	3	5	FALSE	ITGB1	0.792152	4.23564e-08	-995	-0.49	3.5e-05
chr10_80206604_80207090	-0.258562	6.36364e-07	2	2	4	FALSE	LINC00857	0.973531	0.000312015	-620	-0.63	7.6e-08
chr10_93074811_93075498	0.316426	3.27273e-07	0	0	0	TRUE	CYP26A1	-3.1616	5.1878e-07	1336	-0.43	0.00036
chr11_5690208_5690879	0.25504	2.63636e-06	2	4	6	FALSE	TRIM22	-0.959038	0.000110626	519	-0.56	2e-06
chr11_118529284_118529576	0.203256	1.21212e-08	0	1	1	FALSE	TMEM25	-1.09501	0.000163615	-1465	-0.46	0.00039
chr11_119322074_119322434	-0.167374	1.27273e-07	0	1	1	FALSE	MCAM	1.62538	2.30684e-13	553	-0.33	0.0073
chr14_24131683_24131812	0.191031	2.09697e-06	0	0	0	FALSE	FITM1	-2.32737	5.77491e-15	408	-0.65	5.2e-09
chr14_24132323_24132556	0.220679	3.39394e-06	0	0	0	FALSE	FITM1	-2.32737	5.77491e-15	1048	-0.54	4e-06
chr14_73592627_73592901	-0.24458	9.09091e-08	1	1	2	FALSE	ACOT4	-0.524302	0.0131628	921	-0.33	0.0073
chr15_52527289_52527698	-0.17479	4e-07	1	2	3	FALSE	MYO5A	0.836781	0.000245832	-1352	-0.48	5.7e-05
chr16_18982995_18983525	-0.203468	1.27273e-07	0	0	0	FALSE	TMC7	1.77714	1.34553e-11	-409	-0.49	4.4e-05
chr16_24844704_24844873	-0.211695	4.13333e-06	0	0	0	FALSE	SLC5A11	2.41054	4.45344e-08	-968	-0.34	0.0048
chr16_56626446_56626836	0.290325	7.21212e-07	3	4	7	FALSE	MT1E	-3.57726	2.3454e-16	971	-0.76	0
chr16_68266152_68266246	-0.155718	4.99394e-06	1	2	3	FALSE	SLC7A6	1.19726	2.34777e-07	1636	-0.67	8.2e-11
chr17_78187676_78188000.1	-0.186716	3.0303e-08	3	5	8	FALSE	TK1	2.14617	1.90884e-27	443	-0.52	2.6e-05
chr19_8306395_8306541	0.230803	7.27273e-07	0	1	1	FALSE	CD320	0.533146	0.005704	-1815	0.44	0.00022
chr2_10119713_10120103	-0.23688	6.06061e-09	3	4	7	FALSE	RRM2	3.0427	1.61932e-33	-595	-0.57	1.2e-06
chr2_10121882_10122143.1	-0.168081	6.06061e-09	3	2	5	TRUE	RRM2	3.0427	1.61932e-33	1184	-0.66	1.7e-09
chr2_174247631_174247986	-0.171418	0	3	5	8	FALSE	OLA1	0.982268	5.72431e-10	-712	-0.76	0
chr2_219244000_219244129.1	-0.173921	2.19394e-06	0	0	0	FALSE	GLB1L	0.799944	0.000287465	-1349	-0.53	1.3e-05
chr22_21868307_21868409	-0.166023	2.38788e-06	3	5	8	FALSE	MAPK1	0.529355	6.5633e-07	627	-0.43	0.00035
chr3_33097783_33097991	-0.185547	3.14545e-06	2	3	5	FALSE	GLB1	0.777571	6.95619e-06	553	-0.4	0.0019
chr3_52452675_52452885	-0.224278	5.0303e-07	1	0	1	FALSE	TNNC1	1.71585	9.52848e-06	-1185	-0.44	0.00024
chr4_54652_55030	-0.168177	1.81818e-07	0	1	1	FALSE	ZNF595	0.865077	4.91582e-07	1367	-0.59	3e-07
chr5_163458085_163458356.1	-0.247989	3.3697e-06	2	2	4	FALSE	HMMR	3.19716	2.82736e-37	-1847	-0.49	9e-05
chr5_163458749_163459022.1	-0.20572	6.66667e-08	3	5	8	FALSE	HMMR	3.19716	2.82736e-37	-1181	-0.61	2.4e-07
chr6_17394762_17395161	-0.193116	3.0303e-08	3	1	4	FALSE	CAP2	3.00278	1.27944e-72	1546	-0.73	0
chr6_30718072_30718263.1	-0.162573	3.28485e-06	2	2	4	FALSE	TUBB	0.751164	2.96085e-10	-1938	-0.4	0.0022
chr6_30719040_30719420	-0.190872	1.36364e-06	2	2	4	FALSE	TUBB	0.751164	2.96085e-10	-781	-0.55	6.6e-06
chr6_53796393_53796583	-0.182986	4.72121e-06	2	3	5	FALSE	LRRC1	2.41964	2.0776e-14	1896	-0.32	0.0097
chr7_76396960_76397207	-0.205653	5.57576e-07	0	0	0	FALSE	ZP3	2.0965	4.01827e-15	-311	-0.53	5.6e-06
chr7_76397858_76398293	-0.195409	2.66667e-07	0	0	0	FALSE	ZP3	2.0965	4.01827e-15	340	-0.65	4.3e-09
chr7_100080117_100080743	-0.245369	3.0303e-08	2	3	5	FALSE	ZNF3	0.574301	1.14404e-07	-1805	-0.63	3.8e-08
chr7_103346419_103346495	-0.236596	0	1	1	2	FALSE	DNAJC2	0.607758	1.36843e-09	1546	-0.65	6.4e-09
chr8_19899678_19900626	-0.255482	0	0	0	0	FALSE	LPL	3.2385	2.14459e-30	-1091	-0.61	1.4e-07
chr8_23102884_23103074	0.251614	1.54545e-06	0	3	3	TRUE	TNFRSF10C	-0.831545	0.00438592	294	-0.41	0.00064
chr8_48735032_48735293	0.217598	1.4e-06	0	1	1	TRUE	EFCAB1	-1.2948	0.000867501	-18	-0.44	0.00029
chr8_85373081_85373335	-0.247197	6.06061e-09	0	0	0	FALSE	CA3	-1.72671	5.51263e-07	-101	0.35	0.0044
chr8_85465316_85466086	0.171075	4.12121e-07	0	3	3	FALSE	CA2	-2.13724	9.89294e-17	1464	-0.44	0.00056
chr8_100157309_100157531	-0.150871	4.01818e-06	1	1	2	FALSE	SPAG1	0.592428	0.00583046	-375	-0.43	0.00034
chr8_144825398_144826455	-0.253196	1.21212e-08	2	1	3	FALSE	ZNF7	0.761874	4.12713e-09	-1009	-0.55	2.8e-06
chrX_49170826_49171307	-0.178387	1.27273e-07	0	0	0	FALSE	PLP2	1.75114	2.1754e-12	-619	-0.49	3.6e-05
chrX_109535034_109535154	-0.261581	2e-07	0	0	0	FALSE	NXT2	0.64834	0.000307713	-627	-0.54	4.7e-06
chr1_58575901_58577030	0.316119	0	0	3	3	TRUE	TACSTD2	-2.31267	2.91514e-08	-743	-0.39	0.0012
chr1_116109678_116110472	-0.276549	6.06061e-09	1	0	1	FALSE	MAB21L3	1.02407	0.00204175	-1283	-0.51	1.4e-05
chr1_116111709_116112176	-0.213862	6.06061e-09	1	1	2	FALSE	MAB21L3	1.02407	0.00204175	0	-0.48	5e-05
chr1_161158741_161158951	-0.272052	0	2	4	6	FALSE	USP21	0.703147	1.87907e-06	-499	-0.58	4.6e-07
chr10_10793485_10793810	-0.395166	0	0	0	0	FALSE	SFTA1P	5.41792	5.62169e-30	-1170	-0.76	1.1e-13
chr10_10794045_10795405	-0.340467	0	0	0	0	FALSE	SFTA1P	5.41792	5.62169e-30	0	-0.67	6e-10
chr10_10795855_10796316	-0.325971	0	0	0	0	FALSE	SFTA1P	5.41792	5.62169e-30	875	-0.67	9e-10
chr10_25172797_25173342	-0.335571	0	0	0	0	FALSE	GPR158	3.81725	1.32147e-19	-1460	-0.72	0
chr11_2159809_2161565	-0.352561	0	0	0	0	FALSE	IGF2	5.82139	5.69826e-18	1151	0.65	2.7e-09
chr11_8167572_8168248	-0.279198	0	0	0	0	FALSE	RIC3	-1.09979	0.0466771	-807	0.63	1.8e-08
chr11_8169770_8170168	-0.314079	0	0	0	0	FALSE	RIC3	-1.09979	0.0466771	715	0.57	5.1e-07
chr11_78419836_78420369	-0.352071	0	1	0	1	FALSE	GAB2	0.715757	1.301e-05	1488	-0.56	1.9e-06
chr12_7090455_7090925	0.263834	0	2	4	6	FALSE	C1R	-1.67956	2.29675e-11	-1682	-0.49	3.9e-05
chr12_110500684_110501164.1	-0.257395	0	2	2	4	FALSE	RAD9B	0.679384	0.00387694	-491	-0.41	0.0024
chr12_113774463_113775067	-0.272793	0	0	0	0	FALSE	LINC01234	5.88654	6.31729e-12	780	-0.54	3e-06
chr14_105707765_105708693	-0.351967	0	0	0	0	TRUE	IGHA1	-2.61741	1.02771e-07	0	0.58	7e-07
chr14_105845046_105846122	-0.359177	4.84848e-08	0	0	0	FALSE	IGHD	-2.49127	4.0495e-06	0	0.55	2.2e-06
chr14_105853901_105856282	-0.355767	6.06061e-09	0	0	0	TRUE	IGHM	-1.59572	0.0016336	0	0.6	5.7e-07
chr14_105857846_105858368	-0.318731	3.0303e-08	0	0	0	FALSE	IGHM	-1.59572	0.0016336	1628	0.39	0.0056
chr15_23565016_23566853	-0.34681	6.66667e-08	2	0	2	TRUE	MKRN3	4.39806	5.17513e-15	0	-0.71	1.8e-11
chr15_84599935_84600335	-0.249495	1.81818e-08	2	3	5	FALSE	ZSCAN2	0.956701	7.03131e-18	-651	-0.65	4.3e-09
chr16_71526284_71526996	0.266778	0	0	2	2	FALSE	CHST4	-3.62513	1.49723e-10	1051	-0.63	1.1e-08
chr17_4772482_4772839	-0.268971	2.42424e-08	2	3	5	FALSE	TM4SF5	0.961936	0.00186575	598	-0.58	5.9e-07
chr17_36000767_36000954	-0.243509	3.0303e-08	3	5	8	FALSE	CCL15	0.710918	0.0394	-1084	-0.48	0.00014
chr17_80262768_80263150	-0.279268	0	2	3	5	FALSE	RNF213	0.823783	7.17496e-07	1902	-0.48	5.7e-05
chr17_81647891_81648712	0.360402	0	0	0	0	TRUE	NPLOC4	0.815919	3.52557e-11	0	0.6	2.3e-07
chr18_24137936_24138494	-0.297669	0	2	3	5	FALSE	CABYR	4.48141	1.31161e-20	-462	-0.69	0
chr19_21852922_21853714	-0.270846	6.06061e-09	1	0	1	FALSE	ZNF43	1.41213	7.83175e-07	797	-0.4	0.00099
chr19_35513535_35513884	-0.360161	9.09091e-08	0	0	0	FALSE	DMKN	1.24252	0.0244921	0	0.37	0.0024
chr19_51126521_51126869	-0.349217	0	0	3	3	FALSE	SIGLEC9	-1.27216	1.47453e-06	1613	0.4	0.00085
chr19_51140028_51141368	-0.308959	0	1	3	4	FALSE	SIGLEC7	-1.50244	1.93474e-08	-931	0.59	3.3e-07
chr19_51141611_51144822	-0.284836	0	0	1	1	FALSE	SIGLEC7	-1.50244	1.93474e-08	0	0.52	2.4e-05
chr2_31154239_31155208	-0.337772	2.42424e-08	0	0	0	FALSE	GALNT14	-2.50398	1.80388e-29	0	0.57	1.1e-06
chr2_102309794_102310570	-0.338272	0	0	0	0	FALSE	IL1RL1	-2.5229	1.6301e-09	-932	0.47	0.00015
chr20_610752_611335	-0.220383	6.06061e-08	0	0	0	TRUE	TCF15	1.42605	1.98732e-06	354	-0.35	0.0042
chr20_5504829_5505227	-0.273389	0	1	0	1	FALSE	LINC00654	1.2567	3.68956e-05	216	-0.39	0.0015
chr3_10165517_10166092	-0.35563	0	2	3	5	FALSE	IRAK2	0.669264	0.00372025	652	-0.61	1.2e-07
chr3_10166324_10166416	-0.327736	0	2	2	4	FALSE	IRAK2	0.669264	0.00372025	1459	-0.64	1.3e-08
chr3_112331397_112332714	-0.33609	1.81818e-08	1	0	1	FALSE	CD200	1.68239	2.78313e-09	0	-0.42	0.00055
chr3_133040015_133040750	-0.313095	0	0	0	0	FALSE	TMEM108	1.70503	1.39441e-05	1624	-0.33	0.0061
chr4_1113439_1113995	0.280208	0	0	1	1	TRUE	RNF212	-1.86349	2.68267e-12	0	-0.37	0.0022
chr4_184898154_184898754	0.24556	2.42424e-08	0	4	4	FALSE	LINC01093	-4.81153	1.15008e-32	-700	-0.71	2.7e-11
chr5_16937744_16938270	-0.429026	0	0	0	0	FALSE	MYO10	-1.72657	6.21281e-14	1468	0.53	6.8e-06
chr5_111070497_111070963	0.267897	3.0303e-08	0	0	0	TRUE	TSLP	-2.76399	1.22993e-14	435	-0.42	0.00054
chr5_178112323_178112903	-0.289788	0	0	0	0	FALSE	N4BP3	2.18686	5.42621e-13	-540	-0.45	0.00017
chr6_31495759_31496661	-0.266963	5.45455e-08	3	3	6	FALSE	MICB	1.54108	6.42768e-11	878	-0.56	1.6e-06
chr6_43309176_43309812	-0.305503	9.69697e-08	1	1	2	FALSE	CRIP3	1.84393	1.71149e-08	379	-0.66	2.5e-09
chr6_43576701_43577224	-0.467751	0	2	3	5	FALSE	POLH	0.627396	2.26351e-05	551	-0.63	7.4e-08
chr7_88306620_88307042	0.307385	0	1	3	4	TRUE	STEAP4	-2.2959	5.80126e-17	0	-0.43	0.00032
chr7_94653957_94654823.1	-0.272086	6.06061e-09	1	2	3	FALSE	SGCE	1.46922	1.20233e-07	-1749	-0.51	3.8e-05
chr7_101199961_101200475	-0.253091	0	1	0	1	FALSE	MOGAT3	1.48768	4.75798e-06	-563	-0.74	0
chr7_128030940_128032690	0.368189	6.06061e-08	0	1	1	TRUE	LRRC4	-2.08275	3.20108e-16	0	-0.53	7.2e-06
chr7_128936480_128936797	-0.257044	0	1	1	2	FALSE	IRF5	0.607214	0.000103582	-815	-0.34	0.0048
chr8_42152104_42152475	0.29407	1.81818e-08	1	4	5	TRUE	AP3M2	0.758819	6.06458e-09	-471	0.38	0.0017
chr8_85987637_85988506	-0.350798	0	0	0	0	FALSE	ATP6V0D2	5.30475	1.62561e-20	314	-0.55	1.5e-06
chr8_101492028_101494873	0.295836	6.06061e-09	0	3	3	TRUE	GRHL2	-3.35792	9.53095e-16	0	-0.52	9.7e-06
chr8_141392849_141393175	-0.303789	1.21212e-08	0	0	0	FALSE	PTP4A3	2.75166	4.08723e-19	856	-0.42	0.00045
chr8_143245971_143246478	0.316923	6.06061e-09	1	2	3	TRUE	ZFP41	1.60839	6.7642e-25	-343	0.67	1.3e-10
chr9_33402541_33402675	0.24235	6.06061e-09	0	0	0	FALSE	AQP7	-1.75843	1.96439e-11	-7	-0.32	0.0098
chr9_77647531_77648367	0.400699	0	0	4	4	TRUE	GNA14	-2.05044	8.87146e-17	0	-0.47	9.9e-05
chr9_112331381_112332097	-0.228285	1.81818e-08	2	3	5	FALSE	PTBP3	0.508125	7.20936e-06	-1570	-0.68	0
chr9_114506106_114506949	-0.260212	0	0	0	0	TRUE	WHRN	1.28534	4.74179e-08	656	-0.54	3.3e-06
chr9_134879660_134880002	-0.294948	4.84848e-08	0	0	0	FALSE	FCN2	-6.07746	4.52188e-41	-810	0.63	2.8e-08
chr9_134880980_134882168	-0.26082	9.09091e-08	0	0	0	TRUE	FCN2	-6.07746	4.52188e-41	168	0.59	2.9e-07
chrX_49198135_49198468	-0.260232	0	0	0	0	FALSE	SYP	1.50015	4.42158e-08	-1791	-0.53	6.5e-06
chr1_1214344_1214724	-0.156205	4.24242e-07	0	0	0	FALSE	TNFRSF4	1.85287	5.02745e-13	206	-0.54	4.2e-06
chr1_3650668_3651174	0.212388	1.2e-06	0	0	0	TRUE	TP73	2.77235	5.15885e-17	-1346	0.47	0.00016
chr1_9995490_9995756	-0.184195	2.7697e-06	0	0	0	FALSE	RBP7	1.35236	1.95261e-07	-1450	-0.45	0.00019
chr1_52697395_52697860	-0.215428	0	2	3	5	FALSE	COA7	0.647086	2.46315e-08	-506	-0.66	1.4e-09
chr1_112705560_112705921	-0.204319	3.39394e-07	3	5	8	FALSE	RHOC	0.608106	1.40985e-05	-1513	-0.56	2e-06
chr1_151071555_151072014.1	-0.196457	1.93939e-07	2	4	6	FALSE	CDC42SE1	0.625658	1.46085e-05	1230	-0.38	0.004
chr1_151763975_151764458.1	-0.229332	6.06061e-09	2	5	7	FALSE	OAZ3	0.826708	2.947e-05	1076	-0.57	2e-06
chr1_153966371_153966579	-0.156718	4.12121e-07	2	3	5	FALSE	CREB3L4	0.74582	5.87148e-07	-955	-0.5	6.3e-05
chr1_156083338_156083848	-0.239149	5.93939e-07	1	1	2	FALSE	LMNA	0.816117	1.66457e-07	765	-0.42	0.00096
chr1_156639488_156640207	-0.18369	7.39394e-07	0	0	0	FALSE	BCAN	3.93188	1.52737e-18	-1183	-0.43	0.00031
chr1_161224143_161224295.1	-0.220859	6.06061e-09	2	3	5	FALSE	TOMM40L	1.68544	2.7093e-21	-1644	-0.54	1e-05
chr1_161224579_161225030	-0.203814	3.51515e-07	2	4	6	FALSE	TOMM40L	1.68544	2.7093e-21	-909	-0.48	0.00011
chr1_162025116_162025392	-0.202514	3.85455e-06	0	0	0	FALSE	OLFML2B	3.29401	7.83832e-31	1262	-0.45	0.00017
chr1_167913914_167914291	-0.207816	3.0303e-08	1	4	5	FALSE	ADCY10	-0.677055	0.0403956	0	-0.32	0.0089
chr1_173208816_173209215	-0.184062	0	0	0	0	FALSE	TNFSF4	2.02827	5.68131e-12	1503	-0.64	1.7e-08
chr1_181024314_181024728	-0.165517	0	1	0	1	FALSE	STX6	1.01465	1.14252e-18	1193	-0.55	2.6e-06
chr1_201621478_201621802	-0.250715	1.27273e-07	0	0	0	FALSE	NAV1	1.11212	2.41292e-05	-1083	-0.34	0.0052
chr1_201622693_201623932	-0.264571	3.63636e-08	0	0	0	FALSE	NAV1	1.11212	2.41292e-05	0	-0.34	0.0059
chr1_205320389_205320740	-0.226405	2.88485e-06	2	3	5	FALSE	NUAK2	0.671387	0.0103149	-1051	-0.33	0.0066
chr1_207497125_207497678	-0.243325	1.28485e-06	0	2	2	FALSE	CR1	-2.02142	7.52023e-08	978	0.34	0.0051
chr1_231527647_231527858	-0.177424	5.49697e-06	3	5	8	FALSE	TSNAX	0.538201	0.000292515	-795	-0.44	0.00054
chr1_232806147_232807065	-0.272981	0	2	5	7	FALSE	MAP10	1.15381	2.60403e-08	1255	-0.81	0
chr1_235368008_235368446	-0.249501	2.24242e-07	1	3	4	FALSE	TBCE	1.04028	3.03806e-05	648	-0.6	2.2e-07
chr1_244865303_244865628	-0.225081	6.66667e-08	2	1	3	FALSE	HNRNPU	0.63355	1.27605e-10	743	-0.45	0.0002
chr1_247079883_247080572.1	-0.188732	3.63636e-08	1	1	2	FALSE	ZNF670	0.583946	0.00148472	1128	-0.49	7.4e-05
chr10_10796597_10797827	-0.194604	1.27273e-07	0	1	1	FALSE	SFTA1P	5.41792	5.62169e-30	1617	-0.58	5.2e-07
chr10_70131203_70131874	-0.235338	3.09091e-07	3	5	8	FALSE	AIFM2	0.898381	1.14376e-08	-1060	-0.58	6.5e-07
chr10_73908580_73908714	-0.207686	5.33333e-07	1	2	3	FALSE	PLAU	1.3501	1.17334e-06	-463	-0.37	0.0022
chr10_123155359_123155665	-0.176455	1.21212e-07	2	2	4	FALSE	BUB3	0.550493	4.81109e-07	1082	-0.6	2.3e-07
chr11_2150043_2150522	-0.201765	8e-07	0	0	0	FALSE	IGF2	5.82139	5.69826e-18	440	0.45	0.00016
chr11_2169790_2170510	-0.278197	1.27273e-07	0	0	0	TRUE	TH	-5.66693	1.84465e-48	-1367	0.67	5.4e-10
chr11_2171347_2177982	-0.293366	1.81818e-07	0	0	0	FALSE	TH	-5.66693	1.84465e-48	0	0.66	1.7e-09
chr11_9262952_9264039	-0.238818	5.81818e-07	3	5	8	FALSE	DENND5A	0.586328	1.17761e-05	-1351	-0.46	0.00013
chr11_62336920_62337332	-0.165358	3.27273e-07	1	1	2	TRUE	ASRGL1	2.26325	1.5941e-13	-116	-0.65	8.1e-09
chr11_78064108_78064306	0.252918	1.54545e-06	0	2	2	FALSE	THRSP	-1.56489	0.013872	247	-0.77	0
chr11_78064722_78064881	0.233168	2.06061e-07	0	2	2	FALSE	THRSP	-1.56489	0.013872	861	-0.79	0
chr11_78065561_78066456	0.20076	6.9697e-07	0	1	1	FALSE	THRSP	-1.56489	0.013872	1700	-0.84	0
chr11_129816760_129817336	-0.259242	0	3	2	5	FALSE	TMEM45B	1.75278	1.26652e-05	941	-0.47	7.9e-05
chr12_64944_65350	-0.26892	4.84848e-08	0	0	0	FALSE	IQSEC3	-1.33448	1.69032e-07	-1415	0.42	0.00047
chr12_2876040_2876309.2	-0.221882	9.09091e-07	2	0	2	FALSE	TULP3	0.904438	2.21121e-11	-914	-0.6	5.7e-07
chr12_2877946_2878599	-0.151114	3.63636e-07	2	5	7	FALSE	TULP3	0.904438	2.21121e-11	723	-0.44	0.00087
chr12_47943733_47943954	-0.238998	1.41212e-06	0	0	0	FALSE	VDR	1.14569	9.8892e-05	685	-0.35	0.004
chr12_49569254_49569485	-0.183977	1.21212e-08	0	0	0	FALSE	PRPF40B	0.788416	8.18912e-07	1036	-0.5	5.2e-05
chr12_49709033_49709317	-0.255	0	0	0	0	FALSE	FMNL3	0.586255	0.00880736	868	-0.37	0.005
chr12_68159448_68160200	-0.220698	2.12121e-07	1	1	2	FALSE	IFNG	-1.42712	0.000186304	0	0.32	0.0099
chr12_68160535_68160904	-0.33102	1.27273e-07	0	0	0	FALSE	IFNG	-1.42712	0.000186304	788	0.36	0.0032
chr12_108513828_108514621	-0.188321	0	0	0	0	FALSE	FICD	0.969713	0.000118855	-564	-0.57	1.1e-06
chr12_113773868_113774203	-0.272159	2.42424e-08	0	0	0	FALSE	LINC01234	5.88654	6.31729e-12	185	-0.53	5.4e-06
chr12_118063305_118063536	-0.22324	2.42424e-08	1	1	2	FALSE	WSB2	0.507377	1.97959e-05	875	-0.49	3.8e-05
chr13_52456744_52457212	-0.213491	0	0	2	2	FALSE	CKAP2	1.75779	5.38808e-30	1315	-0.75	0
chr14_22957526_22957651	-0.17561	8.30303e-07	2	3	5	FALSE	HAUS4	0.51221	0.0215886	365	-0.47	9.2e-05
chr14_74711679_74712305	-0.212652	1.81818e-08	1	3	4	FALSE	AREL1	0.566641	9.17651e-06	-810	-0.44	0.00058
chr14_75067720_75068452	-0.174205	4.84848e-08	1	3	4	FALSE	ACYP1	0.621329	0.000486193	-1031	-0.43	0.00035
chr14_105524933_105525359	-0.229772	1.14545e-06	0	0	0	FALSE	TMEM121	-1.33697	0.000110963	-1244	0.53	6.5e-06
chr14_105525653_105525786	-0.196052	4.1697e-06	0	0	0	FALSE	TMEM121	-1.33697	0.000110963	-817	0.48	4.7e-05
chr14_105586287_105588387	-0.298668	1.15152e-07	0	0	0	TRUE	IGHA2	-2.16088	1.84196e-05	-8	0.51	1.5e-05
chr14_105846755_105847159	-0.294569	1.27273e-07	0	0	0	FALSE	IGHD	-2.49127	4.0495e-06	1077	0.59	1.5e-07
chr15_55409171_55409353.1	-0.190101	8.90909e-07	2	2	4	FALSE	CCPG1	-0.602083	0.000334276	661	-0.37	0.0044
chr15_65044453_65044822	-0.206431	2.42424e-08	1	0	1	FALSE	SLC51B	2.19728	2.9151e-08	-548	-0.45	0.0002
chr15_66704197_66704859	0.253154	0	0	3	3	FALSE	SMAD6	-1.32201	3.44428e-09	1969	-0.49	4.5e-05
chr15_67253545_67253810	-0.153079	1.33333e-07	1	2	3	FALSE	IQCH	0.806815	0.000283579	-990	-0.51	3e-05
chr15_76058269_76058853	-0.226635	1.81818e-08	0	0	0	FALSE	TMEM266	1.64044	3.23693e-07	-984	-0.37	0.0044
chr15_84602412_84603007	-0.171087	0	2	2	4	FALSE	ZSCAN2	0.956701	7.03131e-18	1426	-0.68	0
chr16_2212851_2213639	-0.225043	5.45455e-08	0	1	1	FALSE	PGP	0.94711	4.19174e-13	-1168	-0.72	0
chr16_66578854_66579204	0.232755	9.09091e-07	0	0	0	TRUE	CMTM2	-3.05573	3.11875e-19	-244	-0.34	0.0053
chr16_66697596_66697813	-0.16248	1.24242e-06	0	0	0	FALSE	CMTM4	0.858789	2.03211e-06	889	-0.33	0.0073
chr16_71525542_71525690	0.232878	9.09091e-08	0	0	0	FALSE	CHST4	-3.62513	1.49723e-10	309	-0.45	0.00018
chr17_8296009_8296195	-0.152344	6.06061e-08	1	3	4	FALSE	SLC25A35	0.707853	0.000499283	666	-0.43	0.00034
chr17_17590285_17590428	-0.199715	1.21212e-07	0	1	1	FALSE	PEMT	-2.04014	1.34162e-17	-1280	0.37	0.0046
chr17_19047902_19048146	-0.217812	2.42424e-08	0	0	0	FALSE	GRAP	-1.36904	3.50756e-09	265	0.32	0.0093
chr17_28600038_28600453	-0.242825	8.48485e-08	3	5	8	FALSE	SPAG5	1.72951	6.74684e-16	759	-0.53	2.1e-05
chr17_28729399_28729504	-0.159177	1.2e-06	0	0	0	FALSE	TLCD1	1.49463	1.14106e-21	1464	-0.56	1.9e-06
chr17_36001250_36001738	-0.186424	4.84848e-08	3	5	8	FALSE	CCL15	0.710918	0.0394	-300	-0.48	0.00019
chr17_54967073_54967406	-0.151922	6.12121e-07	1	2	3	FALSE	STXBP4	1.38874	6.77211e-17	-1321	-0.56	3e-06
chr18_11687526_11688351	-0.287554	3.75758e-07	0	0	0	FALSE	GNAL	2.54288	7.98175e-17	-605	-0.37	0.0024
chr18_11688609_11688854	-0.165467	1.39394e-07	0	0	0	FALSE	GNAL	2.54288	7.98175e-17	-102	-0.41	0.00068
chr19_4903940_4904369	-0.196176	0	0	0	0	FALSE	UHRF1	3.34837	4.4543e-30	860	-0.66	1.3e-09
chr19_18247538_18248008	-0.169827	1.52727e-06	0	0	0	FALSE	PDE4C	1.16138	0.0343422	-192	-0.33	0.0078
chr19_34965205_34965819	-0.161861	3.63636e-08	0	0	0	FALSE	ZNF792	0.855446	1.16104e-09	1156	-0.49	3.4e-05
chr19_35511808_35511981	-0.265651	1.43636e-06	0	0	0	FALSE	DMKN	1.24252	0.0244921	-1677	0.41	0.0008
chr19_35512980_35513298	-0.315088	2.55152e-06	0	0	0	FALSE	DMKN	1.24252	0.0244921	-360	0.47	6.9e-05
chr19_36053170_36053425	-0.233085	2.42424e-08	2	1	3	FALSE	THAP8	0.795135	4.09288e-10	-1337	-0.52	1.8e-05
chr19_36053170_36053425.1	-0.233085	2.42424e-08	2	1	3	FALSE	WDR62	2.72753	2.93681e-34	-1456	-0.48	0.00011
chr19_43826944_43827156	0.177898	7.21212e-07	1	2	3	TRUE	ZNF283	0.595375	0.00289634	-136	0.38	0.003
chr19_44889480_44890162	-0.191317	0	1	3	4	FALSE	TOMM40	0.775941	6.41661e-11	-407	-0.63	4.8e-08
chr19_45493483_45496092	-0.23632	0	1	1	2	TRUE	RTN2	1.18135	1.22201e-06	-969	-0.46	0.00013
chr19_45646902_45648810	-0.198332	3.27273e-07	0	0	0	TRUE	EML2	0.607739	0.00031071	1273	-0.44	0.00028
chr19_48694155_48694624	-0.229234	0	0	0	0	FALSE	FUT2	3.46294	3.93815e-19	-1347	-0.62	6.6e-08
chr2_24083826_24084038	-0.162935	4.24242e-08	3	4	7	FALSE	TP53I3	1.81961	9.63472e-16	-1823	-0.74	0
chr2_24087135_24087735	-0.245378	0	0	0	0	FALSE	TP53I3	1.81961	9.63472e-16	1274	-0.65	9.6e-09
chr2_31156133_31156496	-0.341524	2.21818e-06	0	0	0	FALSE	GALNT14	-2.50398	1.80388e-29	931	0.53	6.6e-06
chr2_31579300_31579533	0.209596	2.32121e-06	0	3	3	FALSE	SRD5A2	-3.08934	2.69948e-11	-1534	-0.36	0.0031
chr2_96115961_96116356	0.242359	6.66667e-08	0	1	1	TRUE	ADRA2B	-2.88946	5.12679e-35	0	-0.51	1.5e-05
chr2_112483427_112483889	-0.247431	0	3	3	6	FALSE	TTL	0.657783	4.21651e-11	1273	-0.61	8.8e-08
chr2_190879467_190879561	-0.217512	1.67273e-06	2	1	3	FALSE	GLS	0.995435	6.92505e-07	-1266	-0.52	8.6e-06
chr2_199468584_199470830	0.268638	4.24242e-08	0	1	1	TRUE	SATB2	0.593301	0.00822138	-436	0.53	6e-06
chr2_219418744_219419014	0.251148	3.63636e-08	0	1	1	TRUE	DES	-4.34719	2.94883e-13	367	-0.36	0.003
chr2_219419994_219420938	-0.27976	7.27273e-08	0	0	0	FALSE	DES	-4.34719	2.94883e-13	1617	0.39	0.001
chr20_10368346_10368956	-0.211498	3.35152e-06	1	0	1	FALSE	SNAP25-AS1	1.42091	0.000153373	0	-0.47	9.5e-05
chr20_25867045_25867404	-0.271325	4.48485e-07	0	0	0	TRUE	FAM182B	1.75938	7.49794e-07	-821	-0.4	0.00076
chr20_25869263_25869961	-0.221656	1.52727e-06	0	0	0	FALSE	FAM182B	1.75938	7.49794e-07	1038	-0.36	0.0032
chr20_33719084_33719715	-0.233582	0	2	4	6	FALSE	PXMP4	0.71159	1.90352e-05	-604	-0.75	0
chr20_33733107_33733427	-0.235552	5.39394e-07	3	5	8	FALSE	ZNF341	0.809782	2.01633e-09	1450	-0.55	2.4e-06
chr20_38927290_38928473	-0.270766	4e-07	2	0	2	FALSE	FAM83D	2.29621	1.03423e-29	978	-0.66	6.3e-10
chr20_46513211_46513325	0.197224	7.21212e-07	1	2	3	FALSE	ZNF334	-0.911939	0.0130154	-234	-0.38	0.0019
chr20_57558099_57559732	-0.222227	3.0303e-08	2	2	4	FALSE	PCK1	-3.37926	3.15379e-15	-1348	0.46	0.00012
chr21_38120023_38120374	-0.194554	2.09697e-06	0	0	0	FALSE	DSCR8	6.56848	6.21114e-07	-1077	-0.59	2e-07
chr21_38120582_38120931	-0.229636	1.27273e-06	0	0	0	FALSE	DSCR8	6.56848	6.21114e-07	-520	-0.6	1.1e-07
chr21_38121297_38122055	-0.250056	9.09091e-08	0	0	0	TRUE	DSCR8	6.56848	6.21114e-07	0	-0.61	5.4e-08
chr21_42878230_42878441	-0.187121	7.21212e-07	1	1	2	FALSE	WDR4	1.06151	2.52205e-11	-1127	-0.53	1.5e-05
chr21_43660698_43660855.1	-0.180276	9.15152e-07	1	2	3	FALSE	HSF2BP	2.9088	2.14653e-27	1205	-0.61	2e-07
chr21_44348259_44349029	-0.275295	1.21212e-07	0	0	0	TRUE	TRPM2	1.21861	8.90641e-05	-1134	-0.32	0.0088
chr22_30573638_30573827	-0.193047	1.33333e-07	1	1	2	FALSE	GAL3ST1	2.24777	8.1143e-10	-760	-0.46	0.00011
chr22_31213964_31214116	-0.169608	2.99394e-06	2	1	3	FALSE	LIMK2	1.04256	3.76199e-06	1725	-0.61	1.4e-07
chr22_39994591_39995104	0.311657	1.80606e-06	0	2	2	TRUE	FAM83F	-5.19025	6.61602e-40	0	-0.52	1.2e-05
chr22_43089625_43089985	-0.18454	6.06061e-08	2	3	5	TRUE	TTLL1	1.18167	9.56391e-14	197	-0.55	3.1e-06
chr22_50562205_50562483	-0.169365	1.24242e-06	0	0	0	TRUE	SYCE3	0.971972	0.000405057	-422	-0.39	0.0012
chr3_10164366_10164530	-0.189662	0	2	3	5	FALSE	IRAK2	0.669264	0.00372025	-335	-0.47	7.9e-05
chr3_37452573_37452735	0.192688	3.87273e-06	0	4	4	TRUE	ITGA9	-1.74148	1.94788e-10	458	-0.37	0.0021
chr3_47581823_47582347	-0.206224	0	0	0	0	FALSE	CSPG5	3.09108	5.95168e-22	1031	-0.65	1.1e-08
chr3_72886601_72886914	-0.215488	6.66667e-07	0	0	0	FALSE	GXYLT2	2.82469	1.08684e-10	-1159	-0.35	0.0037
chr3_122324952_122325325	-0.161342	3.42424e-06	1	1	2	FALSE	CSTA	0.871047	0.016759	0	-0.62	5.1e-08
chr3_158104198_158104308	0.194806	5.43636e-06	0	0	0	TRUE	RSRC1	0.621469	2.38356e-09	-1547	0.35	0.0043
chr3_160401601_160402754	-0.238396	0	3	5	8	FALSE	IFT80	0.827247	1.60789e-05	1721	-0.76	0
chr4_52051223_52052036	0.255727	1.15152e-07	2	4	6	TRUE	SPATA18	-2.51048	2.11107e-18	0	-0.56	1.9e-06
chr4_74099860_74100270	-0.206241	2.42424e-08	3	4	7	FALSE	CXCL2	-3.29148	2.84336e-20	567	0.45	0.00015
chr4_82799282_82799581	0.225487	0	0	0	0	FALSE	SCD5	-1.40719	2.09156e-07	425	-0.45	0.00018
chr5_75717767_75718166	-0.238537	0	3	5	8	FALSE	POC5	0.6223	2.24639e-10	286	-0.64	2.1e-08
chr5_151437922_151438219	-0.201905	4.24242e-08	0	0	0	FALSE	SLC36A1	1.12158	5.99351e-09	876	-0.38	0.0017
chr5_154189153_154189414	-0.164246	3.27273e-07	0	1	1	FALSE	GALNT10	0.919887	3.36866e-08	-1316	-0.32	0.0087
chr5_177131213_177131788	-0.182279	5.57576e-07	0	1	1	FALSE	NSD1	0.67155	3.00796e-07	-1237	-0.44	0.00026
chr5_177302415_177302444	-0.203402	1.76364e-06	2	3	5	FALSE	RAB24	0.623197	2.0423e-05	-1300	-0.45	0.0003
chr5_177304722_177305183.1	-0.192951	2.72727e-07	2	4	6	FALSE	RAB24	0.623197	2.0423e-05	978	-0.5	5.6e-05
chr5_177310641_177311415	-0.175372	6.06061e-09	0	2	2	TRUE	MXD3	1.52444	2.33968e-08	-1342	-0.74	0
chr5_177312688_177313147	-0.220894	3.0303e-08	2	2	4	TRUE	MXD3	1.52444	2.33968e-08	0	-0.61	1.1e-07
chr5_177403431_177404928	0.301881	5.15152e-07	0	1	1	TRUE	GRK6	0.675131	4.41164e-08	227	0.37	0.0026
chr6_41074793_41075341	-0.171878	0	2	4	6	FALSE	NFYA	0.882357	1.82306e-16	1848	-0.51	1.5e-05
chr7_4776438_4776853	-0.169165	6.06061e-09	2	2	4	FALSE	AP5Z1	0.872742	1.47503e-10	823	-0.6	2e-07
chr7_28959244_28959472	-0.152147	8.36364e-07	0	1	1	FALSE	TRIL	1.21757	3.32165e-07	952	-0.41	0.00059
chr7_73325441_73326169	-0.217511	0	0	0	0	FALSE	TRIM50	5.44859	7.0359e-23	-1913	-0.35	0.0038
chr7_79450996_79451143	-0.22987	3.65455e-06	1	3	4	FALSE	MAGI2-AS3	-1.69563	3.38733e-07	-1734	0.4	0.00095
chr7_151517282_151518144	-0.224209	0	3	5	8	FALSE	RHEB	0.65901	1.20736e-05	-1976	-0.67	0
chr8_85987257_85987419	-0.219	0	0	0	0	FALSE	ATP6V0D2	5.30475	1.62561e-20	0	-0.49	2.8e-05
chr8_94639873_94640179	0.168729	2e-07	0	1	1	TRUE	ESRP1	-2.11197	1.81998e-05	-895	-0.44	0.00021
chr8_107498946_107500454	-0.344517	1.09091e-07	0	0	0	FALSE	ANGPT1	1.6272	3.79906e-10	891	-0.39	0.0014
chr8_144081772_144082079	-0.166911	3.0303e-08	2	3	5	FALSE	GPAA1	1.3721	6.82177e-16	-511	-0.63	2.4e-08
chr9_20620294_20620544	0.230375	2.05455e-06	1	3	4	TRUE	MLLT3	0.707951	0.0202995	-1999	0.36	0.0035
chr9_105448872_105449179	-0.221698	2.60606e-07	2	2	4	FALSE	FSD1L	1.37318	1.43197e-09	1076	-0.63	3.6e-08
chr9_127705302_127706008	-0.210045	3.33939e-06	0	0	0	FALSE	CFAP157	1.28555	1.92541e-10	-981	-0.36	0.0032
chr9_127707206_127707534	-0.166188	5.15152e-07	0	0	0	FALSE	CFAP157	1.28555	1.92541e-10	217	-0.44	0.00021
chrX_20268114_20268183	0.286149	4.68485e-06	0	3	3	TRUE	RPS6KA3	0.578997	5.35184e-05	595	0.41	0.00079
chrX_49201541_49201677	-0.151884	7.32121e-06	0	0	0	FALSE	SYP	1.50015	4.42158e-08	1282	-0.34	0.0061
chrX_102650844_102651074	0.30334	1.5697e-06	0	1	1	FALSE	GPRASP1	-1.0803	1.60739e-05	-292	-0.33	0.0074
chrX_153725519_153725720	-0.305182	2.19394e-06	0	1	1	TRUE	ABCD1	0.853421	2.28881e-07	651	-0.41	0.0013
chr1_9540453_9542091	-0.355264	0	2	4	6	TRUE	SLC25A33	0.529748	0.0251806	971	-0.63	2.5e-08
chr1_13890976_13891631	-0.414248	0	0	0	0	FALSE	KAZN	-2.12626	1.60351e-14	-1161	0.64	1.9e-08
chr1_16020502_16020652	-0.276462	2.42424e-08	0	0	0	FALSE	CLCNKA	2.72904	1.79873e-08	1627	-0.41	0.0012
chr1_17305514_17306711	-0.261207	6.06061e-09	0	0	0	FALSE	PADI4	-3.22196	3.05033e-15	-1484	0.36	0.0028
chr1_26360026_26360631	0.310847	2.42424e-08	0	1	1	TRUE	CRYBG2	3.36042	3.3014e-20	0	0.61	7.1e-08
chr1_66752064_66752321	0.265013	5.45455e-08	0	2	2	TRUE	TCTEX1D1	-3.03557	1.48432e-21	-138	-0.46	0.00015
chr1_110657123_110657430	-0.271103	0	0	0	0	FALSE	AL365361.1	-1.05051	0.00199488	83	0.47	8.8e-05
chr1_118983368_118990519	0.310288	0	0	1	1	TRUE	TBX15	-1.12244	0.00548862	0	-0.4	0.00098
chr1_146053083_146053543	-0.379214	0	2	3	5	FALSE	LINC01719	1.86906	4.12624e-17	517	-0.59	6.6e-07
chr1_151131050_151132521	0.279609	1.81818e-08	0	3	3	TRUE	AL592424.1	1.2057	0.000806617	0	0.58	2.9e-07
chr1_151196584_151197986	-0.284296	1.81818e-08	3	5	8	FALSE	PIP5K1A	0.625184	6.22384e-09	0	-0.51	2.6e-05
chr1_151196584_151197986.1	-0.284296	1.81818e-08	3	5	8	FALSE	VPS72	1.16134	3.88151e-53	1263	-0.63	4.8e-08
chr1_153375069_153375343	-0.416207	0	0	0	0	FALSE	S100A12	-3.13699	3.92364e-13	-306	0.51	1e-05
chr1_153389994_153390788	-0.340386	0	0	0	0	FALSE	S100A8	-2.363	8.73723e-09	-400	0.56	1.5e-06
chr1_153391013_153391928	-0.346344	0	0	1	1	FALSE	S100A8	-2.363	8.73723e-09	0	0.56	1.4e-06
chr1_155858046_155858990	-0.333795	0	3	5	8	FALSE	GON4L	0.605518	5.28525e-07	-410	-0.5	4.4e-05
chr1_157897931_157898347	-0.323933	0	0	0	0	FALSE	CD5L	-4.16869	1.00768e-22	0	0.68	0
chr1_158289945_158290472	-0.336559	0	0	0	0	FALSE	CD1C	-1.04971	0.00305416	159	0.35	0.0038
chr1_158291147_158291395	-0.344745	0	0	0	0	FALSE	CD1C	-1.04971	0.00305416	1361	0.42	0.00059
chr1_158928946_158929578	-0.400319	0	0	0	0	FALSE	PYHIN1	-0.917219	0.00559472	-1218	0.5	2.5e-05
chr1_158929968_158930899	-0.326641	0	1	2	3	FALSE	PYHIN1	-0.917219	0.00559472	0	0.43	0.00035
chr1_169631466_169632157	-0.338088	0	0	0	0	FALSE	SELP	-1.70057	3.11469e-05	1273	0.6	2.5e-07
chr1_173669524_173669996	0.353203	0	0	0	0	TRUE	ANKRD45	2.54038	1.80414e-06	0	0.4	0.001
chr1_177350340_177350901	-0.302363	7.27273e-08	0	0	0	FALSE	LINC01645	-2.03748	3.89733e-18	-685	0.32	0.0079
chr1_179880836_179881567.1	-0.301854	2.42424e-08	2	3	5	FALSE	AL353708.3	0.826686	0.0113023	-1028	-0.35	0.0078
chr1_186678913_186679599	-0.300898	6.66667e-08	0	3	3	FALSE	PTGS2	-1.99046	2.68162e-06	-828	0.5	2.4e-05
chr1_200621942_200622210	-0.299284	0	2	0	2	FALSE	KIF14	3.73008	1.52242e-53	1208	-0.67	0
chr1_204376893_204377417.1	-0.265702	4.84848e-08	3	4	7	FALSE	AL606489.1	3.27989	5.91636e-34	-433	-0.64	1.3e-08
chr1_206612869_206613409	-0.251794	0	3	3	6	FALSE	EIF2D	0.712885	2.16648e-12	406	-0.68	0
chr1_206897764_206898579	-0.297631	0	0	0	0	FALSE	IL24	-1.03282	0.0109517	321	0.35	0.0037
chr1_212283558_212284485	-0.260869	6.06061e-09	2	3	5	TRUE	PPP2R5A	0.557397	0.000112077	-1052	-0.56	1.4e-06
chr1_223843939_223844407	-0.315271	0	2	3	5	FALSE	TP53BP2	1.40163	2.47755e-18	-1565	-0.67	0
chr1_224175699_224175905	0.265054	0	0	0	0	TRUE	DEGS1	0.779815	3.40619e-08	0	0.41	0.00069
chr1_225997650_225998427	-0.266465	0	3	3	6	FALSE	SDE2	0.583425	7.78551e-07	-904	-0.62	5e-08
chr1_234479490_234479752	-0.240249	2.42424e-08	1	0	1	FALSE	TARBP1	1.68345	1.72903e-25	387	-0.44	0.0003
chr1_234957674_234958050	-0.256411	1.81818e-08	0	0	0	FALSE	AL391832.1	1.76017	0.000613291	443	-0.48	4.1e-05
chr10_4678419_4679176	-0.269715	6.06061e-09	1	0	1	FALSE	MANCR	-2.25445	6.78485e-08	265	0.43	0.00036
chr10_6577845_6579534	-0.280762	3.63636e-08	2	3	5	FALSE	PRKCQ-AS1	-0.914414	0.00978235	-885	0.41	0.0014
chr10_6581672_6582764	-0.450198	0	0	2	2	FALSE	PRKCQ-AS1	-0.914414	0.00978235	1253	0.5	4e-05
chr10_6708551_6709942	-0.307792	6.06061e-09	0	0	0	FALSE	LINP1	-1.78123	0.00840043	0	0.6	9.8e-08
chr10_12193886_12194470	-0.422928	0	2	3	5	FALSE	CDC123	0.564479	2.66798e-10	-1495	-0.65	1.7e-08
chr10_17808312_17809073	-0.262323	1.81818e-08	0	0	0	FALSE	MRC1	-1.64329	8.26588e-08	-271	0.34	0.0056
chr10_43075721_43076202	-0.298473	1.81818e-08	0	0	0	FALSE	RET	-1.49045	0.00223981	-825	0.34	0.0055
chr10_120454826_120456043	-0.359975	0	0	0	0	FALSE	PLPP4	-2.5938	2.44063e-07	-911	0.63	1.1e-08
chr10_122018116_122019086	-0.285871	6.06061e-09	1	3	4	FALSE	AC063960.1	2.80084	1.21542e-05	-74	-0.68	4.3e-10
chr10_123939807_123940100	-0.341692	6.06061e-09	0	0	0	FALSE	CPXM2	-0.949039	0.0106415	-167	0.46	0.00013
chr10_123940418_123941856	-0.289207	6.06061e-09	0	0	0	FALSE	CPXM2	-0.949039	0.0106415	151	0.5	2.8e-05
chr11_5227196_5227539	-0.320021	0	0	0	0	FALSE	HBB	-3.19568	1.94732e-19	-1856	0.65	6.3e-09
chr11_5228040_5228450	-0.26899	0	0	0	0	FALSE	HBB	-3.19568	1.94732e-19	-945	0.62	5.7e-08
chr11_7237855_7238243	-0.336631	0	0	0	0	FALSE	SYT9	-3.3559	1.6054e-08	-535	0.58	2.8e-07
chr11_10611896_10612370	-0.342267	0	1	0	1	FALSE	LYVE1	-3.58459	7.74867e-25	207	0.63	2.9e-08
chr11_10613021_10614025	-0.361755	0	0	1	1	FALSE	LYVE1	-3.58459	7.74867e-25	1332	0.6	2e-07
chr11_19115369_19116721	-0.251152	6.06061e-09	0	2	2	FALSE	ZDHHC13	1.04572	4.47107e-06	-378	-0.32	0.0089
chr11_20388877_20389089	-0.25986	7.87879e-08	2	2	4	FALSE	PRMT3	1.08784	2.63132e-24	1347	-0.64	2.2e-08
chr11_59057598_59057859	-0.240375	2.42424e-08	0	1	1	FALSE	AP001636.3	0.628774	0.032353	-800	-0.32	0.0095
chr11_60376431_60376722	-0.348129	0	0	1	1	FALSE	MS4A7	-1.53702	5.05694e-10	-1760	0.39	0.0028
chr11_60379593_60379982	-0.373855	0	1	3	4	FALSE	MS4A7	-1.53702	5.05694e-10	1111	0.46	0.00022
chr11_60380186_60380643	-0.331152	0	1	3	4	FALSE	MS4A7	-1.53702	5.05694e-10	1704	0.49	9e-05
chr11_61201081_61201812	-0.366673	0	0	0	0	TRUE	PGA3	-2.66276	4.58295e-08	-1495	0.42	0.00051
chr11_61202145_61202394	-0.325753	0	0	0	0	FALSE	PGA3	-2.66276	4.58295e-08	-913	0.57	7.1e-07
chr11_68750546_68751101	0.252989	9.09091e-08	0	1	1	TRUE	TESMIN	2.58193	1.25191e-23	-463	0.48	6.7e-05
chr11_89499004_89499102	-0.28872	0	0	0	0	FALSE	NOX4	2.79102	1.4362e-29	817	-0.58	5.2e-07
chr11_112959801_112960747	-0.307581	0	0	0	0	FALSE	NCAM1	-2.55688	1.59962e-14	-500	0.51	1.7e-05
chr11_118527757_118528291	0.26127	6.06061e-08	0	2	2	FALSE	TTC36	-3.62464	5.57983e-14	285	-0.73	0
chr11_118528755_118528865	0.247477	1.81818e-08	0	1	1	FALSE	TTC36	-3.62464	5.57983e-14	1283	-0.68	0
chr11_119058187_119058558	-0.248949	6.06061e-08	1	2	3	FALSE	HYOU1	1.33797	4.48609e-07	985	-0.41	0.00081
chr11_124564799_124565702	-0.348137	0	0	0	0	FALSE	OR8A1	3.70302	9.30553e-05	-958	-0.34	0.0051
chr12_8678989_8679888	-0.294609	7.87879e-08	0	0	0	FALSE	RIMKLB	-0.545081	0.011963	-1712	0.39	0.0014
chr12_8680200_8680855	-0.31586	9.09091e-08	0	0	0	FALSE	RIMKLB	-0.545081	0.011963	-745	0.37	0.0026
chr12_9950221_9950566	-0.320982	1.81818e-08	0	1	1	FALSE	CLEC12A	-2.43318	1.82055e-15	-750	0.61	1.3e-07
chr12_10012507_10013043	-0.258423	6.06061e-09	0	0	0	FALSE	CLEC1B	-6.32537	6.56493e-40	-381	0.65	4.4e-09
chr12_10013868_10014057	-0.32832	0	0	0	0	FALSE	CLEC1B	-6.32537	6.56493e-40	444	0.64	5.5e-09
chr12_10407628_10408003	-0.300162	3.63636e-08	0	0	0	FALSE	KLRC4	-1.49206	0.00442305	-1754	0.37	0.0024
chr12_40690848_40691238	-0.283038	5.45455e-08	0	0	0	FALSE	CNTN1	-1.8823	0.000349068	-1204	0.4	0.00092
chr12_49186317_49187251	-0.331811	0	2	3	5	FALSE	TUBA1C	1.30461	1.58755e-11	-1485	-0.56	1.6e-06
chr12_49190105_49190639	-0.38147	0	1	0	1	FALSE	TUBA1C	1.30461	1.58755e-11	1369	-0.63	4.8e-08
chr12_68747124_68747968	-0.317124	0	3	5	8	FALSE	SLC35E3	0.793029	1.46084e-09	1018	-0.83	0
chr12_69358529_69359086	-0.40959	0	2	2	4	FALSE	YEATS4	0.598783	0.00105413	-617	-0.64	1.8e-08
chr12_93314940_93315756	-0.317645	0	2	1	3	FALSE	AC124947.2	1.41329	2.98588e-06	131	-0.68	0
chr12_98517804_98518454	-0.344824	1.81818e-08	2	2	4	FALSE	TMPO-AS1	1.42666	5.90465e-12	1382	-0.63	3.6e-08
chr12_119591732_119592398	-0.30918	0	0	0	0	FALSE	TMEM233	1.38479	2.67677e-09	-1061	-0.57	1.2e-06
chr13_36371077_36371447	-0.373486	0	0	0	0	FALSE	SPART	-1.51046	4.82762e-12	897	0.52	9.2e-06
chr13_49584315_49584566	-0.244398	0	1	1	2	FALSE	RCBTB1	0.532567	2.00446e-05	-1017	-0.64	2.2e-08
chr13_64074927_64076082	-0.390855	0	1	0	1	FALSE	LINC00355	6.60291	3.95605e-14	0	-0.5	2e-05
chr13_64076307_64079199	-0.352519	3.0303e-08	1	0	1	TRUE	LINC00355	6.60291	3.95605e-14	263	-0.55	3e-06
chr14_21022886_21023796	0.292283	0	0	4	4	FALSE	TPPP2	-2.93108	1.36873e-15	-313	-0.79	0
chr14_21022886_21023796.1	0.292283	0	0	4	4	FALSE	AL161668.4	-2.49295	2.16299e-09	-376	-0.79	0
chr14_21642358_21642726	-0.35545	8.48485e-08	0	0	0	FALSE	TRAV1-2	-1.20246	0.00357409	-163	0.36	0.0027
chr14_24576884_24577531	-0.281133	0	0	0	0	FALSE	CTSG	-1.04265	0.0339422	624	0.42	0.00049
chr14_24610576_24610837	-0.377904	0	0	0	0	FALSE	GZMH	-0.896938	0.00333777	877	0.43	0.00036
chr14_53955729_53957065	0.351799	2.42424e-08	1	2	3	TRUE	BMP4	1.82232	2.82742e-09	-1696	0.47	7.3e-05
chr14_54397619_54398535	-0.309772	0	1	1	2	FALSE	CDKN3	3.95293	1.86894e-48	770	-0.8	0
chr14_95713153_95714017	-0.288285	1.81818e-08	0	0	0	TRUE	TCL1A	-1.6873	0.000652993	-179	0.34	0.0059
chr14_97975268_97976953	-0.322764	2.42424e-08	2	1	3	FALSE	LINC01550	-1.82696	6.00549e-07	-1171	0.53	8.2e-06
chr14_97978896_97979542	-0.329006	0	0	0	0	FALSE	LINC01550	-1.82696	6.00549e-07	772	0.49	3.2e-05
chr14_106129099_106129736	-0.320584	0	0	0	0	FALSE	IGHV3-13	-2.03933	0.000531773	-336	0.41	0.0007
chr14_106185512_106186024	-0.250555	0	0	0	0	FALSE	IGHV1-18	2.57516	0.000157287	118	0.36	0.0028
chr14_106276516_106277169	-0.232029	0	0	0	0	FALSE	IGHV1-24	-2.03458	0.000492531	0	0.49	2.6e-05
chr14_106325028_106325382	-0.260354	0	0	0	0	FALSE	IGHV4-28	-1.77653	0.00527606	268	0.48	4.2e-05
chr15_20504200_20504776	-0.277204	0	1	1	2	FALSE	HERC2P3	1.1328	0.000262409	-1404	-0.43	0.00033
chr15_26556927_26558066	-0.360953	0	0	0	0	FALSE	AC009878.1	-2.00189	0.00312126	0	0.64	8.2e-09
chr15_26558640_26559141	-0.385086	2.42424e-08	0	0	0	FALSE	AC009878.1	-2.00189	0.00312126	703	0.64	6.8e-09
chr15_40595167_40596086	-0.265033	0	2	2	4	FALSE	KNL1	1.36691	2.5766e-11	1147	-0.53	6.6e-06
chr15_41333826_41334529	-0.311023	0	2	3	5	FALSE	NUSAP1	-1.65755	1.04833e-15	1132	-0.76	0
chr15_41333826_41334529.1	-0.311023	0	2	3	5	FALSE	OIP5	2.0621	2.90996e-19	1205	-0.76	0
chr15_45129091_45130257	0.307066	0	0	1	1	TRUE	DUOX1	2.64042	2.85872e-21	0	0.55	2.1e-06
chr15_59105702_59106064	-0.265726	0	2	1	3	FALSE	CCNB2	3.91064	2.36358e-57	624	-0.8	0
chr15_64150555_64151110	-0.26949	0	1	1	2	FALSE	SNX22	2.34705	4.36628e-12	-605	-0.46	0.00015
chr15_64823842_64824675	0.429015	0	0	1	1	TRUE	PIF1	2.02811	1.2554e-11	-993	0.41	0.00072
chr15_66385922_66386286	-0.251619	0	2	3	5	FALSE	TIPIN	1.06979	2.19087e-15	-460	-0.58	1.3e-06
chr15_90992950_90993649	-0.301999	0	1	1	2	FALSE	PRC1	2.18611	2.36975e-08	-1980	-0.65	4.7e-09
chr16_3610285_3610863	-0.279987	0	2	3	5	FALSE	SLX4	0.595765	0.000431043	-735	-0.45	0.0003
chr16_22812335_22812793	-0.291519	0	0	0	0	FALSE	HS3ST2	1.51599	5.15813e-05	-1384	-0.58	6.4e-07
chr16_84293525_84294498	-0.297156	0	0	0	0	FALSE	WFDC1	-1.47076	3.33416e-06	-148	0.51	1.6e-05
chr17_6554044_6554506	-0.308478	2.42424e-08	0	1	1	FALSE	PITPNM3	-4.51868	2.75893e-53	-1988	0.55	3.2e-06
chr17_27352941_27353264	-0.285725	2.42424e-08	2	3	5	FALSE	SYPL1P2	1.22247	0.00497438	357	-0.44	0.00022
chr17_28901841_28902094	-0.267313	0	2	3	5	FALSE	DHRS13	1.36963	4.24357e-08	-977	-0.6	1.7e-07
chr17_30376708_30376978	-0.268342	0	1	1	2	FALSE	CPD	1.30712	6.49999e-14	-1927	-0.67	0
chr17_35509249_35509992	-0.361038	0	0	0	0	FALSE	AC015911.3	-1.04585	0.00673486	-278	0.6	1e-07
chr17_35510243_35510614	-0.352831	0	0	0	0	FALSE	AC015911.3	-1.04585	0.00673486	0	0.57	6.4e-07
chr17_35515498_35515938	-0.32597	0	0	0	0	FALSE	TOMM20P2	-0.856306	0.0259384	312	0.33	0.0069
chr17_37405582_37405847	-0.379545	2.42424e-08	2	1	3	FALSE	ACACA	1.07262	1.25205e-10	-971	-0.56	3e-06
chr17_44185261_44185971	-0.237925	1.21212e-08	1	5	6	FALSE	ASB16-AS1	0.771148	5.48618e-08	-746	-0.37	0.005
chr17_44365751_44366242	-0.298057	6.06061e-09	0	0	0	FALSE	FAM171A2	2.3843	1.22133e-14	1876	-0.48	5.1e-05
chr17_61862541_61862749	-0.227373	0	2	2	4	FALSE	BRIP1	1.68247	5.28008e-16	-772	-0.61	1.1e-07
chr17_70051130_70051917	-0.366236	0	0	0	0	FALSE	KCNJ16	-2.02518	0.000133286	-1512	0.62	5.9e-08
chr17_74566539_74567408	-0.287674	3.63636e-08	0	0	0	FALSE	CD300H	-1.13433	0.000388346	0	0.41	0.00056
chr17_75206595_75207222	-0.310094	0	1	3	4	FALSE	NUP85	0.528462	4.68146e-08	936	-0.62	7.9e-08
chr17_77085453_77085776	-0.25434	1.21212e-08	0	0	0	FALSE	SNHG20	0.565842	0.0028934	-940	-0.39	0.0014
chr17_81635913_81636130	-0.269134	0	2	3	5	FALSE	TSPAN10	0.808371	2.89172e-06	-1041	-0.5	2.6e-05
chr17_82521297_82521697	-0.267533	6.06061e-08	2	3	5	FALSE	FOXK2	0.678415	3.22319e-07	1584	-0.44	0.00024
chr18_6929389_6930453	-0.285079	0	0	0	0	TRUE	LINC00668	6.24244	5.49796e-07	0	-0.38	0.002
chr18_55719861_55720574	-0.26723	0	0	0	0	FALSE	AC022031.2	5.97857	8.33132e-07	-489	-0.43	0.00027
chr18_55721082_55721508	-0.350649	6.06061e-09	0	0	0	TRUE	AC022031.2	5.97857	8.33132e-07	19	-0.67	9e-10
chr18_55721829_55722174	-0.297634	6.06061e-09	0	0	0	FALSE	AC022031.2	5.97857	8.33132e-07	766	-0.49	3.2e-05
chr19_573758_574830	-0.262422	0	2	5	7	TRUE	AC009005.1	1.92249	1.70153e-07	1530	-0.49	4e-05
chr19_6884260_6886456	-0.311033	6.06061e-09	0	0	0	FALSE	ADGRE1	-2.21421	2.62755e-09	-1110	0.57	1e-06
chr19_6889176_6889722	-0.310224	0	0	0	0	FALSE	ADGRE1	-2.21421	2.62755e-09	1610	0.6	1.8e-07
chr19_6998325_6998825	-0.296447	5.45455e-08	0	0	0	FALSE	ADGRE4P	-1.82485	8.13413e-11	453	0.39	0.0013
chr19_6999068_6999439	-0.311068	6.06061e-09	0	0	0	FALSE	ADGRE4P	-1.82485	8.13413e-11	1196	0.44	0.00022
chr19_7761697_7762092	-0.311364	0	0	0	0	FALSE	CLEC4M	-6.47692	1.44791e-28	-1057	0.62	2.2e-08
chr19_40752103_40752786.1	-0.232606	0	2	3	5	FALSE	SNRPA	0.668115	4.24939e-10	1466	-0.6	3.4e-07
chr19_41498811_41501828	-0.280123	1.21212e-08	1	2	3	FALSE	PCAT19	-0.969783	4.08701e-05	0	0.43	0.00039
chr19_41502045_41503175	-0.259559	0	0	1	1	FALSE	PCAT19	-0.969783	4.08701e-05	1396	0.33	0.007
chr19_41625143_41625935	-0.302578	0	0	1	1	FALSE	CEACAM4	-1.49165	4.20565e-06	-1139	0.55	1.8e-06
chr19_41628029_41629004	-0.239743	0	0	0	0	FALSE	CEACAM4	-1.49165	4.20565e-06	955	0.54	3.7e-06
chr19_43465422_43465816	0.258529	1.81818e-08	0	0	0	FALSE	LYPD3	0.972357	9.91215e-05	0	0.6	2.1e-07
chr19_45498405_45499329	0.293754	2.42424e-08	0	1	1	TRUE	RTN2	1.18135	1.22201e-06	1344	0.45	0.00018
chr19_49960360_49962644	-0.299361	6.06061e-09	0	0	0	FALSE	SIGLEC11	-2.57038	2.19573e-20	0	0.53	6.1e-06
chr19_49968046_49968416	-0.343346	0	0	0	0	FALSE	SIGLEC16	-1.85366	1.01627e-10	-1257	0.33	0.0072
chr19_51026079_51026743	-0.301378	6.06061e-09	0	0	0	FALSE	KLK11	-4.824	9.63335e-23	-1296	0.61	5.3e-08
chr19_51027997_51028915	-0.34334	0	0	0	0	FALSE	KLK11	-4.824	9.63335e-23	0	0.66	1.7e-09
chr19_51165907_51166747	-0.325704	0	0	0	0	FALSE	SIGLEC17P	-0.833192	0.00342539	-581	0.33	0.0074
chr19_51748284_51750160	-0.371381	0	0	2	2	FALSE	FPR2	-2.69237	2.3352e-13	-1866	0.48	5.1e-05
chr19_51750747_51751101	-0.349778	0	0	2	2	FALSE	FPR2	-2.69237	2.3352e-13	-925	0.48	4.4e-05
chr19_51751527_51751678	-0.307307	0	1	3	4	FALSE	FPR2	-2.69237	2.3352e-13	-348	0.5	2.3e-05
chr19_51752160_51752969	-0.321882	0	1	3	4	FALSE	FPR2	-2.69237	2.3352e-13	134	0.56	1.2e-06
chr19_51753207_51753636	-0.341289	0	0	1	1	FALSE	FPR2	-2.69237	2.3352e-13	1181	0.54	2.4e-06
chr19_51753894_51755101	-0.339722	0	0	2	2	FALSE	FPR2	-2.69237	2.3352e-13	1868	0.46	9.9e-05
chr19_51801498_51802254	-0.34837	0	0	1	1	FALSE	FPR1	-1.16386	0.00513825	-1856	0.37	0.0024
chr19_51804699_51804901	-0.328689	3.0303e-08	0	1	1	FALSE	FPR1	-1.16386	0.00513825	589	0.39	0.0014
chr19_54254470_54258325	-0.256257	1.21212e-08	0	1	1	FALSE	LILRB5	-2.25088	3.85312e-21	0	0.47	7.8e-05
chr19_54258560_54259346	-0.350654	0	0	0	0	FALSE	LILRB5	-2.25088	3.85312e-21	1259	0.53	6.1e-06
chr19_54276184_54281924	-0.290493	1.81818e-08	0	1	1	FALSE	LILRB2	-0.907907	0.000242704	0	0.32	0.0083
chr19_54309864_54313005	-0.294074	0	0	1	1	FALSE	LILRA5	-2.05675	2.33388e-11	-134	0.55	2e-06
chr19_54313289_54314537	-0.375766	0	0	1	1	FALSE	LILRA5	-2.05675	2.33388e-11	150	0.58	6.3e-07
chr19_54335441_54338651	-0.308505	6.06061e-09	0	0	0	FALSE	LILRA4	-0.902827	0.0281757	-499	0.44	0.00026
chr19_54339139_54340696	-0.33402	0	0	0	0	FALSE	LILRA4	-0.902827	0.0281757	0	0.38	0.0018
chr19_54571079_54573081	-0.285279	0	0	1	1	FALSE	LILRA2	-1.88569	1.30453e-11	0	0.49	4.2e-05
chr19_54573314_54573551	-0.288107	0	1	1	2	FALSE	LILRA2	-1.88569	1.30453e-11	394	0.4	0.00084
chr19_54573793_54577202	-0.318198	0	1	1	2	FALSE	LILRA2	-1.88569	1.30453e-11	873	0.54	4.5e-06
chr19_54591562_54592509	-0.340938	0	0	0	0	FALSE	LILRA1	-1.58301	7.22238e-11	-1073	0.53	6.6e-06
chr19_54593139_54593929	-0.27332	0	0	0	0	FALSE	LILRA1	-1.58301	7.22238e-11	0	0.39	0.0011
chr19_54594132_54594894	-0.337961	0	0	1	1	FALSE	LILRA1	-1.58301	7.22238e-11	550	0.55	2.7e-06
chr19_54618435_54618575	-0.313221	0	1	0	1	FALSE	LILRB1	-1.06689	0.000382109	1277	0.35	0.004
chr19_54872450_54873059	-0.357398	0	0	0	0	FALSE	FCAR	-1.82456	0.000117608	-1189	0.34	0.006
chr19_54874892_54875279	-0.345892	0	1	1	2	FALSE	FCAR	-1.82456	0.000117608	644	0.5	2.9e-05
chr19_54904333_54905102	-0.358707	0	0	0	0	FALSE	NCR1	-1.47032	1.97153e-05	-1048	0.52	8.8e-06
chr19_54906402_54907397	-0.314176	6.06061e-09	0	0	0	FALSE	NCR1	-1.47032	1.97153e-05	252	0.4	0.00089
chr19_55333071_55334624	-0.293991	0	2	0	2	FALSE	TMEM150B	2.06318	3.95605e-14	0	-0.59	3.2e-07
chr2_10446904_10447213	-0.294011	6.06061e-09	2	3	5	FALSE	ODC1	1.10907	1.26217e-05	-1291	-0.69	0
chr2_19356145_19357656	0.322261	2.42424e-08	1	1	2	TRUE	OSR1	1.42952	0.000386665	-997	0.39	0.0012
chr2_40610946_40611408	-0.333212	0	0	0	0	FALSE	SLC8A1	-0.847786	0.00183023	0	0.32	0.0084
chr2_42492538_42493728	0.366923	0	0	1	1	TRUE	MTA3	0.880334	1.4799e-18	-841	0.74	0
chr2_61064653_61065134	-0.251163	0	0	1	1	FALSE	KIAA1841	1.39181	8.66143e-18	-737	-0.62	5.5e-08
chr2_70834995_70835747	-0.355755	0	0	0	0	FALSE	CD207	-1.80309	2.14649e-05	-75	0.5	1.9e-05
chr2_85603677_85604046.1	-0.255308	0	3	2	5	FALSE	USP39	0.668816	1.28701e-29	821	-0.61	1.9e-07
chr2_88897504_88897694	-0.303127	0	0	0	0	FALSE	IGKV5-2	-1.35071	0.0306123	272	0.56	8.2e-07
chr2_88948077_88948586	-0.368142	0	0	0	0	FALSE	IGKV1-5	1.75192	0.0098323	120	0.41	0.00071
chr2_88965978_88966476	-0.266822	0	0	0	0	FALSE	IGKV1-6	-2.97705	7.35514e-06	-291	0.6	1e-07
chr2_89117799_89118244	-0.385823	0	0	0	0	FALSE	IGKV1-17	-3.45035	6.41335e-09	0	0.51	1.1e-05
chr2_89177458_89177903	-0.281267	0	0	0	0	FALSE	IGKV2-24	-3.16802	3.58196e-10	298	0.68	5e-10
chr2_89214899_89215220	-0.257847	0	0	0	0	FALSE	IGKV1-27	-1.46585	0.0117403	971	0.61	4.2e-08
chr2_89223314_89223881	-0.304092	0	0	0	0	FALSE	IGKV2-28	-1.22317	0.0493162	853	0.58	2.8e-07
chr2_89268513_89269264	-0.244351	1.81818e-08	0	0	0	FALSE	IGKV1-33	-2.05272	0.000836543	7	0.53	5e-06
chr2_89958564_89959131	-0.275869	0	0	0	0	FALSE	IGKV2D-28	-1.32132	0.0444412	-848	0.42	0.00046
chr2_90082388_90082695	-0.333497	0	0	0	0	FALSE	IGKV1D-17	-1.46642	0.0375614	0	0.56	1.1e-06
chr2_90083076_90083652	-0.275515	0	0	0	0	FALSE	IGKV1D-17	-1.46642	0.0375614	441	0.57	4.7e-07
chr2_90099205_90099637	-0.346089	0	0	0	0	FALSE	IGKV1D-16	-1.35949	0.022561	-599	0.58	2.8e-07
chr2_95527370_95527719	-0.294699	3.0303e-08	1	1	2	FALSE	AC009237.14	0.524323	0.0151082	668	-0.56	1.9e-06
chr2_102309794_102310570.1	-0.338272	0	0	0	0	FALSE	IL18R1	-1.29569	7.47447e-08	-959	0.34	0.0096
chr2_102419375_102420039	-0.322086	0	1	2	3	FALSE	IL18RAP	-1.62803	1.88453e-11	686	0.56	1.3e-06
chr2_102420280_102420705	-0.367424	0	2	2	4	FALSE	IL18RAP	-1.62803	1.88453e-11	1591	0.58	6.5e-07
chr2_118940492_118941496	-0.290206	2.42424e-08	0	0	0	FALSE	MARCO	-6.81247	3.69843e-66	-670	0.58	5.4e-07
chr2_118942009_118942515	-0.318065	0	0	0	0	FALSE	MARCO	-6.81247	3.69843e-66	0	0.68	0
chr2_131094403_131094770	-0.242198	6.06061e-09	2	3	5	FALSE	FAM168B	0.553515	6.86048e-05	943	-0.37	0.0024
chr2_144667836_144668451	-0.341818	8.48485e-08	0	0	0	FALSE	TEX41	3.37686	2.2214e-17	0	-0.49	3.3e-05
chr2_162073046_162073223	-0.238297	7.27273e-08	3	4	7	FALSE	DPP4	0.97115	4.46002e-05	-1319	-0.58	5.9e-07
chr2_182521416_182522288	-0.276635	0	0	0	0	FALSE	PDE1A	-0.811265	0.0189566	-904	0.49	3.1e-05
chr2_215311040_215311564	-0.263475	5.45455e-08	2	3	5	FALSE	ATIC	0.890587	3.57653e-10	-253	-0.59	2.8e-07
chr2_218064813_218065348	-0.277839	6.06061e-08	0	0	0	FALSE	CXCR2P1	-1.93936	3.18468e-07	-381	0.56	1.8e-06
chr2_218166029_218166526	-0.329131	0	0	1	1	FALSE	CXCR1	-2.99031	2.08318e-17	-469	0.39	0.0012
chr20_677295_678677	-0.308921	3.63636e-08	0	0	0	FALSE	AL121758.1	2.15732	2.09267e-08	1495	-0.58	2.6e-07
chr20_26250438_26251783	-0.292917	4.24242e-08	0	0	0	TRUE	MIR663AHG	8.7219	2.34961e-10	0	-0.4	0.001
chr20_31953079_31954100	-0.270537	6.06061e-09	0	0	0	FALSE	PDRG1	0.859202	2.84189e-14	987	-0.68	0
chr20_33672692_33673400	-0.337632	0	2	2	4	FALSE	NECAB3	1.52702	7.45723e-15	-1063	-0.75	0
chr20_48923660_48925082	-0.255276	0	2	3	5	FALSE	ARFGEF2	0.717878	4.31849e-11	1770	-0.64	1.9e-08
chr20_59121034_59122134	-0.335925	1.81818e-08	0	2	2	FALSE	ZNF831	-1.03506	0.00231204	-1247	0.45	0.00018
chr20_59122372_59124188	-0.307603	4.84848e-08	1	2	3	FALSE	ZNF831	-1.03506	0.00231204	0	0.45	0.0002
chr20_63379778_63381789	-0.275668	9.69697e-08	0	0	0	TRUE	CHRNA4	-2.14071	0.000183597	1377	0.4	0.00076
chr21_18758659_18760584	-0.355023	0	0	0	0	TRUE	MIR548XHG	6.75722	1.30911e-08	0	-0.52	9e-06
chr21_18855587_18856441	-0.258595	0	0	0	0	FALSE	PPIAP22	0.658656	6.34128e-07	-1338	-0.61	1.5e-07
chr21_18856956_18857127	-0.322094	0	0	0	0	FALSE	PPIAP22	0.658656	6.34128e-07	-652	-0.54	3.8e-06
chr21_18857713_18857983	-0.382771	0	0	0	0	FALSE	PPIAP22	0.658656	6.34128e-07	0	-0.58	5.8e-07
chr22_15785511_15786193	-0.293434	6.06061e-09	2	0	2	FALSE	DUXAP8	4.92683	6.88125e-36	552	-0.71	0
chr22_15822860_15823822	-0.30187	0	0	0	0	FALSE	AP000525.1	2.76291	3.20829e-08	0	-0.39	0.0026
chr22_15822860_15823822.1	-0.30187	0	0	0	0	FALSE	BMS1P22	3.44833	6.6296e-09	1976	-0.59	3e-07
chr22_33058808_33059521	-0.303275	6.06061e-09	0	0	0	FALSE	SYN3	1.90113	1.10489e-09	436	-0.42	0.00044
chr22_45286491_45287226	-0.300115	0	1	0	1	FALSE	UPK3A	5.85846	7.58006e-28	1509	-0.39	0.0012
chr3_8744194_8747925	-0.344276	6.06061e-09	0	0	0	FALSE	SSUH2	3.45753	1.77045e-12	0	-0.32	0.0094
chr3_11772099_11772619	-0.264516	0	0	0	0	FALSE	VGLL4	0.912783	3.20729e-09	749	-0.49	3.4e-05
chr3_25172598_25173023	-0.330071	0	0	0	0	FALSE	RARB	-1.133	1.12629e-06	-1309	0.53	7.2e-06
chr3_25174392_25174773	-0.382037	0	0	0	0	FALSE	RARB	-1.133	1.12629e-06	60	0.55	2.9e-06
chr3_28574163_28574400	-0.338908	0	0	0	0	FALSE	RBMS3	-1.68605	2.76673e-15	-391	0.51	1.5e-05
chr3_48661136_48662639	0.286603	2.42424e-08	1	1	2	TRUE	CELSR3	3.09269	1.49026e-23	-276	0.64	4.2e-08
chr3_48661136_48662639.1	0.286603	2.42424e-08	1	1	2	TRUE	LINC02585	2.56438	1.29677e-08	-1137	0.61	1.2e-07
chr3_75214459_75214856	-0.339809	6.06061e-09	0	0	0	TRUE	HNRNPA3P6	0.75555	7.75005e-08	0	-0.44	0.00019
chr3_125936564_125937056	-0.371856	0	1	0	1	TRUE	ALG1L	4.4017	2.77651e-33	0	-0.7	0
chr3_135438066_135439839	-0.365766	0	0	0	0	FALSE	AC092969.1	-3.65754	2.43165e-13	-49	0.48	4e-05
chr3_149130946_149131187	-0.257717	6.06061e-09	0	3	3	FALSE	HPS3	1.11625	3.26921e-13	1362	-0.69	0
chr3_185959374_185959667	-0.246942	0	1	0	1	FALSE	NMRAL2P	5.96569	9.76484e-28	-276	-0.73	5.6e-12
chr3_192768437_192768853	-0.302494	0	0	0	0	FALSE	FGF12	1.44693	4.56615e-06	673	-0.42	0.00058
chr4_212443_213568	0.347938	0	0	0	0	TRUE	ZNF876P	0.849744	0.000161023	0	0.63	2.9e-08
chr4_1684886_1685677	-0.292136	0	0	1	1	TRUE	FAM53A	0.788476	0.00067636	584	-0.68	0
chr4_25158919_25159758	-0.362612	0	3	5	8	FALSE	SEPSECS-AS1	0.538951	0.00494034	-883	-0.59	1e-06
chr4_31997498_31997738	-0.364794	0	0	0	0	FALSE	LINC02506	3.05623	0.00138279	101	-0.57	6.3e-07
chr4_39366776_39367630	-0.231687	4.84848e-08	3	4	7	FALSE	RFC1	0.625628	3.20729e-09	401	-0.63	2.9e-08
chr4_170341311_170341702	-0.382061	0	0	0	0	FALSE	LINC02512	-5.23625	2.97389e-15	-1387	0.44	0.00021
chr4_170342059_170342242	-0.337672	0	0	0	0	FALSE	LINC02512	-5.23625	2.97389e-15	-847	0.38	0.0018
chr4_176064929_176065387	-0.312089	0	0	0	0	FALSE	WDR17	-1.46747	2.98848e-10	-447	0.33	0.0066
chr4_186728283_186728530	-0.284196	0	3	2	5	FALSE	FAT1	1.46052	3.59568e-07	1561	-0.53	7e-06
chr5_10248899_10249128.1	-0.276601	0	2	3	5	FALSE	CCT5	0.968375	6.21281e-14	-793	-0.69	0
chr5_17065114_17065308	-0.359039	0	0	0	0	FALSE	BASP1	-1.01465	0.00231268	-290	0.49	4e-05
chr5_17065840_17066651	-0.413198	6.06061e-09	0	0	0	FALSE	BASP1	-1.01465	0.00231268	242	0.48	5.1e-05
chr5_126775572_126776046	-0.227358	4.24242e-08	2	3	5	FALSE	LMNB1	1.68986	7.27002e-17	-577	-0.62	6.6e-08
chr5_170299159_170300090	-0.34176	3.63636e-08	2	0	2	FALSE	LCP2	-0.802499	0.00276195	932	0.42	0.00054
chr5_177021640_177021951.1	-0.281545	0	3	3	6	FALSE	ZNF346	0.649462	5.41519e-10	-745	-0.5	5.8e-05
chr5_177132620_177133165	0.30733	7.27273e-08	1	4	5	TRUE	NSD1	0.67155	3.00796e-07	0	0.37	0.0022
chr5_177949514_177950431	-0.277195	3.0303e-08	0	0	0	FALSE	AC106795.2	-1.56198	5.02884e-05	0	0.46	0.00011
chr5_179346707_179347554	-0.316352	1.81818e-08	0	0	0	FALSE	ADAMTS2	-0.859113	0.0212258	1277	0.54	5e-06
chr6_13614269_13614412	-0.275614	0	3	5	8	FALSE	NOL7	0.669173	8.94788e-12	-915	-0.73	0
chr6_17280509_17280933	0.271925	4.84848e-08	0	1	1	TRUE	RBM24	2.91792	3.28239e-20	-413	0.51	1.3e-05
chr6_18122933_18123411	-0.354085	6.06061e-09	2	3	5	TRUE	NHLRC1	0.709196	6.22395e-05	246	-0.53	6.3e-06
chr6_19834869_19836023	-0.40201	0	0	0	0	FALSE	ID4	-1.12088	0.00494561	-1363	0.43	0.00031
chr6_25993346_25993675	-0.29139	0	3	5	8	FALSE	U91328.1	1.32013	6.78348e-11	684	-0.62	4.7e-08
chr6_29558152_29558925	-0.419907	0	2	2	4	FALSE	UBD	3.58957	5.08112e-11	-1000	-0.47	8.6e-05
chr6_29634996_29635274	-0.290392	2.42424e-08	0	0	0	FALSE	GABBR1	-0.993445	0.00408763	1020	0.39	0.0015
chr6_30691866_30692235	-0.264365	2.42424e-08	2	0	2	FALSE	NRM	1.43473	4.1111e-12	446	-0.44	0.00024
chr6_43576701_43577224.1	-0.467751	0	2	3	5	FALSE	XPO5	1.24366	9.39831e-27	626	-0.64	4e-08
chr6_55579690_55580807	-0.350123	0	0	0	0	FALSE	HMGCLL1	-3.05717	4.45026e-17	476	0.72	5.9e-12
chr6_55874470_55874735	-0.259122	0	0	1	1	FALSE	BMP5	-3.18258	1.16546e-11	-829	0.58	3.7e-07
chr6_57173916_57174340.1	-0.294609	6.06061e-09	3	4	7	FALSE	BAG2	0.832892	8.07815e-05	1590	-0.76	0
chr6_57316050_57316429	-0.269028	0	2	2	4	FALSE	PRIM2	1.53872	2.47098e-42	1245	-0.67	0
chr6_152697200_152697586	-0.284255	3.0303e-08	1	0	1	FALSE	MYCT1	-1.54161	4.24324e-13	-309	0.48	5.2e-05
chr6_158534281_158535507	-0.296744	0	0	0	0	FALSE	TMEM181	0.585305	0.00135132	-929	-0.54	5.1e-06
chr7_22726101_22726199	-0.329032	0	0	0	0	FALSE	STEAP1B	1.68892	4.99041e-07	-1414	-0.4	0.0016
chr7_28956944_28958842	0.378022	0	0	1	1	TRUE	TRIL	1.21757	3.32165e-07	0	0.55	2.3e-06
chr7_36391269_36391540.1	-0.307433	0	0	1	1	FALSE	ANLN	4.30638	3.96283e-60	1463	-0.66	6e-09
chr7_64867939_64871517	-0.351966	6.06061e-09	0	0	0	TRUE	ZNF273	0.815287	5.15409e-08	0	-0.41	0.00059
chr7_79766997_79768612	-0.310815	1.81818e-08	0	0	0	TRUE	GNAI1	0.583276	0.00318879	0	-0.42	0.00049
chr7_93918985_93920203	-0.282535	6.06061e-08	1	0	1	FALSE	GNG11	-0.954189	2.39843e-05	-1496	0.33	0.007
chr7_94653957_94654823	-0.272086	6.06061e-09	1	2	3	FALSE	PEG10	4.83784	1.69886e-21	-1502	-0.58	1.2e-06
chr7_99438203_99438339	-0.274129	0	3	5	8	FALSE	CPSF4	0.872997	1.13352e-18	-583	-0.65	7.4e-09
chr7_99927630_99928002	-0.312952	0	0	0	0	FALSE	GJC3	-0.779472	0.0340718	-1618	0.35	0.0047
chr7_100269649_100270568	-0.298212	0	3	0	3	FALSE	CASTOR3	1.33619	3.01583e-12	-1664	-0.65	4.3e-09
chr7_101236799_101238324	-0.292747	0	0	1	1	FALSE	CLDN15	1.87643	7.80691e-13	-496	-0.83	0
chr7_107046337_107046751	-0.287628	8.48485e-08	0	1	1	FALSE	PRKAR2B	-2.02101	1.61182e-18	1688	0.59	3.4e-07
chr7_134528843_134528986	-0.325699	0	2	0	2	FALSE	AKR1B10	5.62484	7.38163e-25	1251	-0.63	3.6e-08
chr7_134529307_134529589	-0.277544	6.06061e-09	2	0	2	FALSE	AKR1B10	5.62484	7.38163e-25	1715	-0.54	4.5e-06
chr7_135746960_135749495	-0.292139	2.42424e-08	0	3	3	FALSE	FAM180A	-2.84896	7.66168e-10	0	0.66	1.7e-09
chr7_135750080_135750552	-0.333791	0	0	1	1	FALSE	FAM180A	-2.84896	7.66168e-10	1234	0.72	1.1e-11
chr7_137344226_137344646	-0.234234	6.06061e-09	0	0	0	FALSE	PTN	-1.32775	3.97946e-05	361	0.47	7.8e-05
chr7_138462002_138462899	-0.259858	6.06061e-09	2	4	6	FALSE	TRIM24	0.74145	3.32165e-07	1668	-0.69	0
chr7_142347161_142347824	-0.297491	6.06061e-08	0	0	0	FALSE	TRBV6-2	-0.98044	0.0256851	-1328	0.38	0.0028
chr7_142348476_142348777	-0.310105	0	0	0	0	FALSE	TRBV6-2	-0.98044	0.0256851	-375	0.35	0.0035
chr7_142351005_142351718	-0.340409	0	0	0	0	FALSE	TRBV6-2	-0.98044	0.0256851	1853	0.37	0.0052
chr7_142379163_142379405	-0.336529	0	0	0	0	FALSE	TRBV6-4	-1.25748	0.0226666	-1401	0.33	0.0063
chr7_142789654_142790330	-0.353297	0	0	3	3	FALSE	TRBJ1-5	-1.61784	0.00176595	1156	0.37	0.0092
chr7_142794588_142794875.1	-0.383584	0	0	3	3	FALSE	TRBJ2-3	-1.24858	0.0015452	-1972	0.48	0.00012
chr7_148881965_148882444	-0.274799	4.24242e-08	2	2	4	FALSE	EZH2	2.14778	1.15998e-31	-1877	-0.72	0
chr7_153409385_153414141	-0.315548	0	0	0	0	TRUE	LINC01287	8.83494	5.13576e-27	0	-0.53	7.7e-06
chr8_2041395_2044793	-0.291437	1.81818e-08	0	0	0	TRUE	MYOM2	-3.33535	4.27795e-31	-247	0.75	0
chr8_2045222_2050131	-0.275695	4.84848e-08	0	0	0	TRUE	MYOM2	-3.33535	4.27795e-31	182	0.69	0
chr8_7019719_7020008	-0.279227	0	0	0	0	FALSE	DEFA3	-3.34395	2.47476e-07	1418	0.56	8.5e-07
chr8_11106270_11106576	-0.336786	6.06061e-09	0	0	0	FALSE	AF131215.6	-0.823781	0.0258538	-128	0.41	0.00063
chr8_11107176_11108159	-0.35221	2.42424e-08	0	0	0	TRUE	AF131215.6	-0.823781	0.0258538	472	0.47	0.0002
chr8_11108373_11111454.1	-0.378986	0	0	0	0	FALSE	AF131215.6	-0.823781	0.0258538	1669	0.42	0.00084
chr8_11485231_11485477	-0.271551	2.42424e-08	0	0	0	FALSE	BLK	-1.00926	0.028461	-1417	0.48	6.1e-05
chr8_13604916_13605578	-0.290972	0	0	0	0	FALSE	DLC1	-1.28901	2.41168e-12	306	0.37	0.0022
chr8_52937335_52937757	-0.281697	3.0303e-08	0	0	0	FALSE	NPBWR1	-1.79362	0.000796161	-674	0.44	0.00019
chr8_75323566_75324711	-0.319973	0	2	0	2	TRUE	CASC9	3.54111	1.42238e-07	-30	-0.59	2.2e-07
chr8_96644204_96644887	-0.276433	0	3	3	6	TRUE	CPQ	0.864485	2.75421e-08	-340	-0.55	2.7e-06
chr8_100723676_100724044	-0.366168	0	1	0	1	FALSE	PABPC1	1.14676	2.71999e-10	867	-0.55	2.9e-06
chr8_106060462_106060785	-0.354057	0	2	0	2	FALSE	ZFPM2-AS1	4.42675	4.89939e-18	0	-0.43	0.00039
chr8_123415617_123416041	-0.382833	0	2	3	5	FALSE	ATAD2	1.86066	1.85214e-30	-309	-0.57	1.7e-06
chr8_135857704_135858059	-0.339119	0	0	0	0	FALSE	LINC02055	4.23415	1.95747e-11	-1310	-0.44	0.0002
chr8_135858408_135859587	-0.351955	0	0	0	0	FALSE	LINC02055	4.23415	1.95747e-11	0	-0.44	0.00019
chr8_135859864_135860060	-0.418502	0	0	0	0	FALSE	LINC02055	4.23415	1.95747e-11	495	-0.34	0.0047
chr8_142681716_142682271	-0.349204	6.06061e-08	0	0	0	FALSE	JRK	1.06214	3.25083e-08	0	-0.51	1.9e-05
chr8_143037967_143038339	-0.303982	3.0303e-08	0	0	0	FALSE	C8orf31	-0.736916	0.0351748	-870	0.35	0.0043
chr8_143290050_143290672	-0.254073	0	2	2	4	TRUE	AC138696.2	0.712291	0.00717861	0	-0.65	1.5e-08
chr8_143290050_143290672.1	-0.254073	0	2	2	4	TRUE	ZNF696	1.17791	3.2632e-17	374	-0.74	0
chr8_143829851_143830082	-0.257989	6.06061e-09	2	2	4	FALSE	PUF60	0.95253	7.13789e-12	0	-0.67	0
chr8_144797361_144797933	-0.301134	0	2	4	6	FALSE	ZNF517	1.22287	1.39893e-10	-943	-0.68	0
chr8_144798188_144798518	-0.374146	0	2	3	5	FALSE	ZNF517	1.22287	1.39893e-10	-358	-0.74	0
chr8_145003659_145004009	-0.23245	3.0303e-08	1	2	3	FALSE	ZNF252P	0.624748	0.000282423	764	-0.54	3.9e-06
chr9_21993387_21994025	-0.404175	0	2	1	3	TRUE	CDKN2B-AS1	2.49124	8.29873e-14	-753	-0.66	7.8e-09
chr9_21995982_21996368.1	-0.277647	8.48485e-08	2	3	5	TRUE	CDKN2B-AS1	2.49124	8.29873e-14	1204	-0.62	1.5e-07
chr9_22011010_22011381	0.302069	0	0	0	0	FALSE	CDKN2B	2.1871	5.63825e-13	1647	0.49	3.7e-05
chr9_67060584_67060966	-0.315878	0	2	2	4	FALSE	CNTNAP3P2	1.58489	6.67625e-05	1024	-0.34	0.0047
chr9_128070003_128070842.1	-0.308554	7.87879e-08	2	1	3	FALSE	SLC25A25	-2.13531	6.13833e-19	1802	0.39	0.0022
chr9_133587666_133588090	-0.311664	9.09091e-08	0	0	0	FALSE	FAM163B	-2.65472	9.38495e-07	1469	0.63	1.6e-08
chr9_134918145_134919013	-0.348566	0	0	0	0	FALSE	FCN1	-1.30048	3.04083e-05	182	0.32	0.0089
chr9_135072337_135074100	-0.323275	0	0	0	0	FALSE	OLFM1	-1.69692	6.86185e-06	-1322	0.67	0
chrX_5726097_5726555	-0.339167	0	0	0	0	FALSE	AC110995.1	-1.6617	3.41512e-12	0	0.46	0.00011
chrX_5727696_5728276	-0.311881	0	0	0	0	FALSE	AC110995.1	-1.6617	3.41512e-12	1391	0.49	3.5e-05
chrX_64307421_64308420	-0.349837	0	0	0	0	FALSE	AL356317.1	-1.86213	1.35065e-05	688	0.56	8.7e-07
chrX_76426656_76427383	-0.339703	6.06061e-09	0	0	0	FALSE	MAGEE1	0.918851	0.000313705	-341	-0.4	0.00088
chrX_140707281_140708512	-0.322442	0	0	0	0	FALSE	LINC00632	2.71568	1.87719e-05	-1050	-0.51	1.9e-05
chrX_140708797_140709229	-0.303939	0	0	0	0	FALSE	LINC00632	2.71568	1.87719e-05	-333	-0.49	4.5e-05
chrX_140710130_140711270	-0.23497	6.06061e-08	0	0	0	FALSE	LINC00632	2.71568	1.87719e-05	568	-0.51	1.4e-05
chrX_148052343_148052787	-0.335783	0	0	0	0	FALSE	FTH1P8	0.590006	0.00636688	110	-0.32	0.0087
chrX_154428087_154428314.1	-0.289461	0	2	3	5	FALSE	ATP6AP1	1.0785	3.53969e-17	-318	-0.54	7.8e-06
chr1_919359_920045	-0.248592	2.7697e-06	0	0	0	FALSE	LINC02593	-3.12495	4.0157e-12	-971	0.53	3.8e-06
chr1_921534_921855	-0.208501	3.0303e-08	0	0	0	FALSE	LINC02593	-3.12495	4.0157e-12	518	0.44	0.00025
chr1_922614_923026	-0.177487	3.64242e-06	0	0	0	FALSE	SAMD11	-2.21537	4.28378e-07	-902	0.55	6.2e-06
chr1_922614_923026.1	-0.177487	3.64242e-06	0	0	0	FALSE	LINC02593	-3.12495	4.0157e-12	1598	0.52	1.8e-05
chr1_1207229_1207301	-0.244275	2.98788e-06	0	0	0	FALSE	TNFRSF18	0.849938	0.020692	538	-0.44	0.00021
chr1_1207712_1208890	-0.229355	2.42424e-08	0	0	0	TRUE	TNFRSF18	0.849938	0.020692	1021	-0.56	2e-06
chr1_1420614_1420691	-0.206955	3.29091e-06	0	0	0	TRUE	ANKRD65	2.36032	8.87558e-11	-1078	-0.33	0.0076
chr1_1448809_1449020	-0.177365	2.0303e-06	0	0	0	FALSE	ATAD3C	-1.62394	0.000168021	-669	0.37	0.0026
chr1_1450103_1450416	-0.177693	1.72727e-06	0	0	0	FALSE	ATAD3C	-1.62394	0.000168021	414	0.34	0.0049
chr1_2017029_2018198	-0.2501	3.27273e-07	0	0	0	FALSE	GABRD	3.84391	4.322e-37	-1100	-0.5	1.6e-05
chr1_9537428_9537606	-0.196469	1.67879e-06	0	1	1	FALSE	SLC25A33	0.529748	0.0251806	-1876	-0.49	4.4e-05
chr1_9538827_9539018	-0.183776	4.84848e-08	0	3	3	FALSE	SLC25A33	0.529748	0.0251806	-464	-0.61	1.3e-07
chr1_9589712_9590461	-0.216769	5.45455e-08	2	1	3	FALSE	TMEM201	1.45678	5.48517e-20	790	-0.65	7.7e-09
chr1_9686453_9686633	-0.151424	2e-07	0	2	2	FALSE	PIK3CD-AS2	1.0714	0.0151481	-922	0.32	0.0098
chr1_11061225_11061548	-0.169162	2.24242e-07	1	2	3	FALSE	SRM	0.821867	2.09415e-07	1201	-0.49	3.1e-05
chr1_11263378_11263806	-0.217797	6.06061e-08	2	3	5	FALSE	MTOR	0.735994	4.28892e-05	871	-0.52	9.7e-06
chr1_11274099_11274367	-0.171494	1.14545e-06	2	2	4	FALSE	UBIAD1	0.547657	3.3763e-05	893	-0.62	7.6e-08
chr1_12018698_12019010	-0.20075	2.78788e-07	2	3	5	FALSE	MIIP	0.569727	1.00309e-05	-456	-0.55	2.4e-06
chr1_32649583_32649891.1	-0.173111	1.13939e-06	3	5	8	FALSE	RBBP4	0.670996	3.6605e-12	-1251	-0.54	8.8e-06
chr1_34779625_34779939	-0.206204	1.0303e-07	0	0	0	FALSE	GJB3	-1.65006	0.00102513	-1250	0.47	6.1e-05
chr1_37690980_37691411	-0.240301	8.48485e-08	3	3	6	TRUE	C1orf109	0.518969	5.22935e-07	-838	-0.49	6.8e-05
chr1_37690980_37691411.1	-0.240301	8.48485e-08	3	3	6	TRUE	CDCA8	3.36458	4.98022e-58	-1007	-0.56	3.8e-06
chr1_37693059_37693256	-0.199868	3.63636e-07	1	1	2	FALSE	CDCA8	3.36458	4.98022e-58	641	-0.56	2.8e-06
chr1_37693059_37693256.1	-0.199868	3.63636e-07	1	1	2	FALSE	C1orf109	0.518969	5.22935e-07	810	-0.57	1.9e-06
chr1_37990529_37991055	-0.168867	2.06061e-07	1	3	4	FALSE	SF3A3	0.552065	3.52654e-10	0	-0.5	4.4e-05
chr1_38858554_38858603.1	-0.178975	4.99394e-06	2	3	5	FALSE	AL139260.1	0.57737	0.0254864	-1397	-0.46	0.00026
chr1_40258923_40259199	-0.226476	2.42424e-07	2	3	5	FALSE	ZMPSTE24	0.582479	2.20587e-05	816	-0.63	8e-08
chr1_43359350_43360396	-0.155718	0	2	0	2	TRUE	CDC20	4.17803	7.19654e-53	395	-0.65	1.4e-08
chr1_45688944_45689212.1	-0.161838	3.45455e-07	2	2	4	FALSE	TMEM69	0.684471	2.89423e-10	1730	-0.57	1.9e-06
chr1_47434053_47434168	0.155974	4.16364e-06	0	0	0	TRUE	FOXD2	1.79298	5.02745e-13	-1849	0.41	0.0013
chr1_47434384_47434882	0.157699	1.70909e-06	0	1	1	TRUE	FOXD2-AS1	1.58377	9.38026e-11	0	0.4	0.0022
chr1_47434384_47434882.1	0.157699	1.70909e-06	0	1	1	TRUE	FOXD2	1.79298	5.02745e-13	-1135	0.39	0.0026
chr1_52402454_52402988	-0.154892	1.57576e-07	1	3	4	FALSE	ORC1	3.3225	5.10987e-38	-1471	-0.62	1.4e-07
chr1_54765387_54765523	-0.259084	6.06061e-09	0	1	1	FALSE	PARS2	0.624273	4.29822e-06	873	-0.58	7.3e-07
chr1_58579125_58579286	-0.219398	9.93939e-07	0	0	0	FALSE	TACSTD2	-2.31267	2.91514e-08	1352	0.5	2.9e-05
chr1_60640032_60640493	-0.302092	1.24242e-06	1	0	1	TRUE	LINC01748	5.50099	8.13565e-13	0	-0.47	7.9e-05
chr1_60641874_60641969	-0.24843	6.06061e-08	0	0	0	FALSE	LINC01748	5.50099	8.13565e-13	1383	-0.34	0.0057
chr1_68050135_68050346	-0.176338	4e-07	0	2	2	TRUE	DIRAS3	-2.82128	2.87089e-16	-1285	0.46	0.00011
chr1_76072976_76073124	-0.310941	3.3697e-06	0	1	1	FALSE	ST6GALNAC3	-1.12919	3.42749e-06	-1595	0.32	0.0081
chr1_92027685_92028513	-0.205754	5.87879e-07	0	0	0	FALSE	EPHX4	2.46833	1.43983e-14	-1469	-0.45	0.00015
chr1_99971017_99971699	-0.239129	5.15152e-07	2	1	3	FALSE	SLC35A3	-0.577508	0.000555851	1666	-0.38	0.0045
chr1_100133902_100134156.1	-0.228422	1.27273e-07	2	3	5	FALSE	SASS6	1.43244	3.13551e-30	947	-0.56	2.6e-06
chr1_109713465_109714219	-0.153249	4.54545e-07	0	0	0	FALSE	GSTM5	-2.77198	2.32349e-08	1685	0.43	0.00033
chr1_109763969_109764298	-0.203797	2.12121e-07	1	1	2	FALSE	EPS8L3	4.98847	3.41955e-20	0	-0.49	3.2e-05
chr1_113905867_113906246.1	-0.173899	6.06061e-08	3	5	8	FALSE	DCLRE1B	1.11336	1.43954e-13	726	-0.57	2.2e-06
chr1_115977436_115977696	-0.218841	4.60606e-07	2	3	5	FALSE	SLC22A15	2.45664	8.11855e-12	938	-0.62	7.4e-08
chr1_115977910_115978069	-0.171409	6.06061e-09	2	3	5	FALSE	SLC22A15	2.45664	8.11855e-12	1412	-0.32	0.0083
chr1_115978319_115979012	-0.250644	1.81818e-08	2	2	4	FALSE	SLC22A15	2.45664	8.11855e-12	1821	-0.53	8.2e-06
chr1_119369207_119369558	0.204717	7.87879e-08	0	2	2	FALSE	HAO2-IT1	-2.69347	5.89275e-08	261	-0.66	4.4e-09
chr1_119369207_119369558.1	0.204717	7.87879e-08	0	2	2	FALSE	HAO2	-2.60152	8.46468e-09	428	-0.72	0
chr1_145844716_145845303	-0.23271	2.06061e-07	1	4	5	FALSE	NUDT17	1.39409	1.61938e-09	-326	-0.57	7.8e-07
chr1_145919924_145920645	-0.201856	6.06061e-09	1	2	3	FALSE	GNRHR2	0.708941	0.00130482	911	-0.36	0.0062
chr1_146050700_146051618.1	-0.215691	3.57576e-07	2	5	7	FALSE	LINC01719	1.86906	4.12624e-17	-948	-0.53	1.7e-05
chr1_147170665_147171303	-0.214454	1.81818e-08	3	3	6	FALSE	PRKAB2	0.633993	0.00252204	-1247	-0.64	5.1e-08
chr1_147170665_147171303.1	-0.214454	1.81818e-08	3	3	6	FALSE	PDIA3P1	0.988339	5.16451e-12	-1441	-0.62	1.8e-07
chr1_147173338_147174188	-0.171786	4.84848e-07	2	3	5	FALSE	PDIA3P1	0.988339	5.16451e-12	594	-0.55	6.6e-06
chr1_150321064_150321185	-0.150279	1.38788e-06	2	3	5	FALSE	PRPF3	0.639292	0.000115375	-291	-0.4	0.00087
chr1_150971760_150972158	-0.178471	9.69697e-08	3	5	8	FALSE	AL590133.1	0.630642	0.0455632	-965	-0.41	0.00066
chr1_151195611_151196251	-0.208448	0	3	2	5	FALSE	VPS72	1.16134	3.88151e-53	290	-0.66	6.6e-10
chr1_151195611_151196251.1	-0.208448	0	3	2	5	FALSE	PIP5K1A	0.625184	6.22384e-09	-1698	-0.52	2.2e-05
chr1_151255509_151256204	-0.215435	0	2	3	5	FALSE	PSMD4	1.01289	7.85608e-20	806	-0.69	0
chr1_151280781_151281061	-0.163596	9.57576e-07	0	2	2	FALSE	ZNF687	1.08071	4.33378e-17	-557	-0.46	0.00022
chr1_151328526_151328620	-0.171507	1.35152e-06	2	3	5	FALSE	PI4KB	0.729451	1.00468e-13	811	-0.34	0.0054
chr1_151763975_151764458	-0.229332	6.06061e-09	2	5	7	FALSE	MRPL9	0.835898	3.66671e-19	411	-0.57	1.5e-06
chr1_151839083_151840248	0.331519	1.33333e-07	2	3	5	TRUE	C2CD4D	2.06376	6.31636e-14	-309	0.59	6e-07
chr1_151839083_151840248.1	0.331519	1.33333e-07	2	3	5	TRUE	AL450992.2	1.27021	0.0101732	-1629	0.59	8.4e-07
chr1_151994541_151994763	-0.218911	1.09091e-07	2	1	3	FALSE	S100A10	1.52169	4.61728e-13	151	-0.63	3.3e-08
chr1_153376295_153377013	-0.294844	2.24242e-07	0	1	1	FALSE	S100A12	-3.13699	3.92364e-13	646	0.52	7.2e-06
chr1_153658279_153658460	-0.165359	1.57576e-07	2	5	7	FALSE	SNAPIN	0.562873	8.99571e-06	-194	-0.6	2.5e-07
chr1_153672106_153672330	-0.154582	1.15152e-07	2	3	5	FALSE	ILF2	1.15554	6.281e-35	1058	-0.71	0
chr1_153966371_153966579.1	-0.156718	4.12121e-07	2	3	5	FALSE	SLC39A1	1.50479	2.31787e-08	-1605	-0.63	7.2e-08
chr1_155229815_155230566	-0.185734	6.06061e-09	0	0	0	FALSE	MTX1P1	2.43249	4.32876e-36	-409	-0.52	6.1e-06
chr1_155689651_155690277	-0.237309	2.09697e-06	2	2	4	FALSE	YY1AP1	0.759255	1.02088e-14	651	-0.51	3.6e-05
chr1_155689651_155690277.1	-0.237309	2.09697e-06	2	2	4	FALSE	DAP3	0.871912	7.30413e-23	1691	-0.6	4.6e-07
chr1_155857500_155857765	-0.166853	1.27273e-07	2	3	5	FALSE	GON4L	0.605518	5.28525e-07	-1635	-0.38	0.0038
chr1_156083338_156083848.1	-0.239149	5.93939e-07	1	1	2	FALSE	MEX3A	2.38114	1.69797e-17	1340	-0.52	1.7e-05
chr1_156367732_156368202	-0.159283	1.33333e-07	1	0	1	FALSE	CCT3	1.25166	3.334e-32	0	-0.66	6.8e-09
chr1_156660244_156660583	-0.162238	5.45455e-08	3	3	6	TRUE	AL590666.2	3.28071	1.42377e-13	-841	-0.47	5.8e-05
chr1_160886557_160886785	-0.267843	2.42424e-08	0	0	0	FALSE	ITLN1	-4.12839	8.27266e-17	1387	0.58	4.4e-07
chr1_161398108_161398488	-0.166263	1.14545e-06	1	1	2	FALSE	AL592295.4	1.38689	3.18264e-10	-921	-0.45	0.00017
chr1_163322808_163323234	-0.176889	0	2	1	3	FALSE	RGS5	1.17874	1.15733e-09	914	-0.62	1.6e-07
chr1_163322808_163323234.1	-0.176889	0	2	1	3	FALSE	RGS5	1.17874	1.15733e-09	1017	-0.59	7.4e-07
chr1_164678785_164679714	-0.338511	6.06061e-09	0	0	0	FALSE	AL391001.1	-1.12931	0.0106512	-371	0.57	6.6e-07
chr1_167519922_167520661	-0.216992	0	0	0	0	FALSE	CD247	-0.964919	0.000157821	1312	0.51	1.5e-05
chr1_168495291_168495544	-0.203584	7.75758e-07	2	4	6	FALSE	AL023755.1	0.995122	0.00334616	-141	-0.51	2e-05
chr1_169661047_169661518	-0.270423	2.12727e-06	0	0	0	FALSE	C1orf112	1.49471	8.91697e-15	-489	-0.56	1.5e-06
chr1_169662011_169663068	-0.240894	5.45455e-08	0	0	0	TRUE	C1orf112	1.49471	8.91697e-15	4	-0.59	3.6e-07
chr1_173474431_173475297	-0.2168	1.27273e-07	1	4	5	FALSE	PRDX6	-0.604919	3.45797e-05	-1969	-0.33	0.0067
chr1_180954697_180954906	-0.223269	4.79394e-06	1	0	1	TRUE	KIAA1614-AS1	1.5826	0.00020851	0	-0.5	2.3e-05
chr1_182392758_182393095	-0.194446	9.33333e-07	1	5	6	FALSE	GLUL	1.77297	8.66216e-08	552	-0.53	7.9e-06
chr1_197145445_197146058	-0.166601	0	2	3	5	FALSE	ASPM	3.82824	3.53243e-55	-636	-0.71	0
chr1_200621238_200621623	-0.243415	0	2	3	5	FALSE	KIF14	3.73008	1.52242e-53	504	-0.75	0
chr1_201889256_201889389	0.206003	6.22424e-06	0	0	0	TRUE	SHISA4	1.88528	1.19243e-11	576	0.49	3.3e-05
chr1_202010439_202011198	-0.264865	1.27273e-07	3	5	8	FALSE	ELF3-AS1	1.59089	1.89703e-10	0	-0.47	0.00017
chr1_202341111_202341360	-0.174485	1.21212e-08	1	1	2	FALSE	UBE2T	3.15939	3.34284e-60	-620	-0.63	2.4e-08
chr1_202342582_202343141	-0.276548	0	1	1	2	FALSE	UBE2T	3.15939	3.34284e-60	602	-0.75	0
chr1_202862440_202862589.1	-0.162296	2.66667e-07	1	1	2	FALSE	AC098934.1	-0.51869	0.0252307	820	-0.64	3.4e-08
chr1_204378879_204379203	-0.249369	3.63636e-08	1	0	1	FALSE	AL606489.1	3.27989	5.91636e-34	1029	-0.59	3e-07
chr1_204495600_204496032	-0.20729	1.81818e-08	2	1	3	FALSE	PIK3C2B	1.05812	4.9469e-12	876	-0.62	5.7e-08
chr1_205851113_205851163	-0.156186	9.21212e-07	0	0	0	FALSE	PM20D1	-1.45624	5.52779e-06	981	0.38	0.0016
chr1_207645298_207645789	0.250574	1.39394e-07	0	0	0	TRUE	CR1L	-1.41961	0.000213574	185	-0.35	0.0036
chr1_207751031_207751352	-0.211183	5.39394e-07	2	4	6	FALSE	CD46	0.54003	0.000123004	-705	-0.52	8.7e-06
chr1_207753395_207753571	-0.216105	5e-06	2	3	5	FALSE	CD46	0.54003	0.000123004	1338	-0.47	7.6e-05
chr1_211417443_211417780	-0.158969	5.45455e-07	0	0	0	FALSE	SNX25P1	2.65909	7.61884e-15	418	-0.69	1.7e-10
chr1_212857198_212857529	-0.203686	2.42424e-08	3	5	8	FALSE	FLVCR1-DT	1.66317	5.86632e-09	-559	-0.65	1.5e-08
chr1_212857198_212857529.1	-0.203686	2.42424e-08	3	5	8	FALSE	FLVCR1	2.28856	6.86874e-47	-726	-0.64	3.4e-08
chr1_213050388_213050822	-0.164414	6.06061e-09	0	3	3	FALSE	RPS6KC1	0.822822	2.94931e-16	-411	-0.67	0
chr1_220088993_220089100	-0.204712	4.04848e-06	1	1	2	FALSE	BPNT1	0.576539	1.13213e-06	-1362	-0.54	4.9e-06
chr1_224357841_224358050	-0.177444	0	2	5	7	FALSE	CNIH4	0.845403	1.45133e-07	991	-0.63	2.8e-08
chr1_227727827_227728104	-0.153403	6e-07	1	3	4	FALSE	SNAP47	0.653788	1.20987e-08	-435	-0.39	0.0014
chr1_228104438_228104692	-0.19067	1.36364e-06	0	1	1	FALSE	C1orf35	1.0371	7.61686e-16	-719	-0.42	0.00045
chr1_228485619_228486293	-0.233236	5.45455e-08	1	2	3	FALSE	RNF187	1.07862	8.49152e-17	-768	-0.7	0
chr1_229270341_229270847	-0.181843	3.63636e-07	3	5	8	TRUE	AL162595.1	1.12691	2.41875e-14	-181	-0.61	2.6e-07
chr1_231336000_231336434	-0.233186	8.54545e-07	2	2	4	FALSE	SPRTN	0.750301	5.76493e-17	-670	-0.48	0.00014
chr1_231422939_231423331	-0.150566	3.63636e-08	2	3	5	FALSE	EGLN1	0.750917	0.000152138	-1713	-0.51	1.6e-05
chr1_234372479_234372745	-0.16172	6.06061e-09	2	3	5	FALSE	COA6	0.767313	0.000383005	-711	-0.57	1.7e-06
chr1_234956083_234957261	-0.214438	0	0	0	0	FALSE	AL391832.1	1.76017	0.000613291	0	-0.64	7.9e-09
chr1_235073208_235073882	-0.203465	4.48485e-07	0	0	0	FALSE	LINC01348	-1.91713	1.29875e-08	-338	0.41	0.00073
chr1_235505820_235506081	-0.210036	5.45455e-08	2	3	5	FALSE	B3GALNT2	0.979307	2.69031e-15	1339	-0.68	0
chr1_238485231_238485958	-0.364801	7.63636e-07	1	1	2	FALSE	LINC01139	4.36391	8.57363e-11	-96	-0.6	1.9e-07
chr1_246507754_246508007	-0.169578	2.42424e-07	1	2	3	FALSE	SMYD3	1.53817	1.29355e-21	442	-0.59	3.5e-07
chr1_248690485_248690895	-0.278197	1.21212e-07	0	0	0	FALSE	CR589904.1	3.83119	0.0014084	-865	-0.46	0.00012
chr1_248827072_248827609	-0.217376	0	1	2	3	FALSE	SH3BP5L	0.866511	5.03605e-11	439	-0.53	6.9e-06
chr10_4679390_4679649	-0.269186	3.57576e-07	1	0	1	FALSE	MANCR	-2.25445	6.78485e-08	1236	0.56	1.1e-06
chr10_15089768_15089932	-0.175093	2.42424e-08	0	0	0	FALSE	ACBD7	1.97314	3.71912e-15	992	-0.54	3.5e-06
chr10_17809401_17810561	-0.26733	3.0303e-07	0	2	2	FALSE	MRC1	-1.64329	8.26588e-08	57	0.33	0.0075
chr10_30116033_30116215	-0.21756	1.41212e-06	0	0	0	FALSE	JCAD	1.72419	1.88341e-11	539	-0.33	0.0072
chr10_32057134_32057220	-0.218967	6.06061e-09	0	3	3	FALSE	KIF5B	0.579552	2.26301e-07	703	-0.5	2.3e-05
chr10_43604611_43605124	-0.174116	2.94545e-06	0	0	0	FALSE	ZNF485	0.5618	0.000148228	-1283	-0.39	0.0012
chr10_44291538_44291977	-0.26017	1.27273e-07	0	0	0	FALSE	AL137026.1	-0.994017	0.0096281	-1732	0.37	0.0023
chr10_44295054_44295630	-0.200238	6.84848e-06	0	0	0	FALSE	AL137026.1	-0.994017	0.0096281	1345	0.35	0.0042
chr10_44387515_44387890	-0.175894	5.57576e-07	0	0	0	FALSE	CXCL12	-2.78255	6.07611e-18	1022	0.61	1.3e-07
chr10_44960323_44960738	-0.17309	4.19394e-06	2	5	7	FALSE	RASSF4	1.08936	1.16819e-14	916	-0.51	4e-05
chr10_50068831_50069047	-0.191113	5.50303e-06	2	3	5	FALSE	WASHC2A	0.805155	3.87561e-10	943	-0.54	8.8e-06
chr10_50068831_50069047.1	-0.191113	5.50303e-06	2	3	5	FALSE	FAM21EP	0.62739	0.00282713	1028	-0.37	0.0044
chr10_56362221_56362385	-0.267627	2.62424e-06	1	2	3	FALSE	ZWINT	2.64472	1.04186e-33	946	-0.48	6.1e-05
chr10_59174468_59174791	-0.197361	1.41212e-06	1	0	1	FALSE	PHYHIPL	1.88734	1.35933e-09	-1799	-0.38	0.0016
chr10_59177857_59178443	-0.226369	1.0303e-07	2	1	3	FALSE	PHYHIPL	1.88734	1.35933e-09	1267	-0.62	5.2e-08
chr10_60051488_60051686	-0.198583	2.33939e-06	0	0	0	FALSE	AL592430.1	-1.60993	0.000446215	820	0.39	0.0014
chr10_60052088_60052284	-0.195961	2.90909e-06	0	0	0	FALSE	AL592430.1	-1.60993	0.000446215	1420	0.4	0.00089
chr10_68472315_68472826	-0.215639	4.24242e-08	3	1	4	FALSE	DNA2	1.07999	1.32934e-05	194	-0.5	2.5e-05
chr10_70603786_70605003	-0.271945	9.09091e-07	0	0	0	FALSE	PRF1	-1.31261	1.41621e-08	1011	0.49	4.1e-05
chr10_73745574_73745710	-0.232102	3.57576e-07	1	2	3	FALSE	SEC24C	0.654468	9.834e-05	1190	-0.38	0.004
chr10_77924791_77925773	-0.205139	6.30303e-07	1	1	2	FALSE	DLG5	1.88845	2.63314e-24	-753	-0.56	4e-06
chr10_77924791_77925773.1	-0.205139	6.30303e-07	1	1	2	FALSE	DLG5-AS1	2.4641	1.01132e-15	-1599	-0.58	1.2e-06
chr10_89702178_89702533	-0.168059	2.42424e-08	2	2	4	FALSE	KIF20B	1.30197	1.96922e-14	568	-0.61	1.3e-07
chr10_103367134_103367654	-0.220814	0	3	5	8	FALSE	TAF5	0.521616	5.32058e-05	-313	-0.65	5.1e-09
chr10_103369167_103369278	-0.235542	1.21212e-08	1	2	3	FALSE	TAF5	0.521616	5.32058e-05	1200	-0.68	0
chr10_121990195_121990487	-0.218627	1.46667e-06	1	0	1	FALSE	TACC2	0.85105	2.41532e-08	1021	-0.33	0.0071
chr10_122879100_122879183	-0.290022	3.13333e-06	2	0	2	FALSE	FAM24B	0.941664	0.000588292	-458	-0.57	8.6e-07
chr11_315935_317012	0.263066	3.27273e-07	2	5	7	TRUE	AC136475.1	0.591149	0.0316155	-1628	0.32	0.0082
chr11_417907_419133	-0.287427	6.06061e-09	0	0	0	FALSE	SIGIRR	-1.27291	7.16477e-09	452	0.48	5.2e-05
chr11_1037775_1037961	-0.197305	2.9697e-06	0	0	0	FALSE	MUC6	-2.80024	2.28587e-06	1069	0.47	7.4e-05
chr11_19242709_19242782	0.172484	6.49697e-06	0	0	0	TRUE	E2F8	4.29523	3.98247e-46	1089	0.51	1.3e-05
chr11_20386589_20386914	-0.196752	1.21212e-08	1	3	4	FALSE	PRMT3	1.08784	2.63132e-24	-616	-0.5	2.8e-05
chr11_27361663_27362540	-0.189372	1.0303e-07	2	3	5	FALSE	CCDC34	1.53908	1.23267e-25	-1328	-0.71	0
chr11_34622852_34624552	0.220852	6.06061e-09	0	2	2	FALSE	EHF	1.7813	4.14125e-06	1759	0.45	0.00018
chr11_47714313_47714614	-0.209053	1.69697e-07	2	2	4	FALSE	AGBL2	-0.729817	0.0221518	-775	-0.41	0.00073
chr11_57182117_57182827	-0.265673	3.63636e-08	0	0	0	FALSE	LRRC55	-3.86104	2.05026e-21	370	0.56	1.3e-06
chr11_57389515_57390501	-0.212453	1.81818e-08	0	0	0	FALSE	PRG2	-2.11257	2.42375e-05	-156	0.39	0.0012
chr11_60182400_60182679	-0.223516	3.42424e-06	2	3	5	FALSE	MS4A6A	-1.91709	4.26628e-13	-1987	0.34	0.0055
chr11_60242304_60242925	-0.23708	6.42424e-07	0	1	1	FALSE	MS4A4E	-1.97987	1.92437e-15	-163	0.32	0.0087
chr11_60333884_60334218	-0.21133	1.0303e-07	0	0	0	FALSE	MS4A6E	-1.20474	0.000167115	-613	0.32	0.0084
chr11_61362889_61363168	-0.224123	6.06061e-09	2	3	5	FALSE	CYB561A3	0.501513	8.62952e-05	590	-0.54	7e-06
chr11_61481401_61482055	-0.163464	2.28485e-06	0	0	0	FALSE	PPP1R32	-1.54437	7.19226e-10	281	0.32	0.0096
chr11_62124856_62125228	-0.17726	1.27273e-07	2	3	5	FALSE	INCENP	1.43073	1.62927e-22	883	-0.59	6.8e-07
chr11_63136245_63136595	-0.207862	3.0303e-07	0	0	0	FALSE	SLC22A10	-2.79963	1.62645e-11	-1272	0.44	0.00026
chr11_65042017_65042580	-0.217893	6.06061e-08	2	0	2	FALSE	SAC3D1	1.25304	1.35978e-30	1116	-0.73	0
chr11_65262977_65263143.1	-0.163477	3.27273e-07	2	2	4	FALSE	POLA2	0.983477	1.77623e-11	1215	-0.6	3.4e-07
chr11_65333334_65333464	-0.222152	1.33333e-07	2	3	5	FALSE	DPF2	0.556847	1.31537e-06	-290	-0.51	1.8e-05
chr11_65355748_65356101	0.17505	5.87879e-07	0	2	2	TRUE	TIGD3	1.92681	1.15736e-10	981	0.51	1.8e-05
chr11_65616782_65616950	-0.192757	2.24242e-07	3	2	5	FALSE	PCNX3	0.560687	6.6098e-06	1009	-0.41	0.0012
chr11_66745704_66745962	-0.185094	2.58182e-06	1	2	3	TRUE	C11orf80	1.12658	2.61592e-10	1253	-0.52	1.1e-05
chr11_67638440_67639664	-0.21813	4.84848e-07	0	0	0	FALSE	TBX10	0.8954	0.00581225	0	-0.33	0.007
chr11_67640791_67640977	-0.264688	5.45455e-08	0	0	0	FALSE	TBX10	0.8954	0.00581225	1231	-0.45	0.00016
chr11_68119768_68119956	-0.233487	2.4e-06	2	3	5	FALSE	CHKA	0.956506	2.06756e-07	-1488	-0.4	0.0011
chr11_68751777_68752117	-0.179117	4.24242e-08	0	2	2	FALSE	TESMIN	2.58193	1.25191e-23	213	-0.65	4.4e-09
chr11_69927133_69927343	-0.247508	5.15152e-07	0	0	0	FALSE	AP007216.2	-2.18686	3.72945e-09	320	0.43	0.00032
chr11_72571077_72571401	-0.277219	6.54545e-07	0	0	0	FALSE	LINC01537	-2.68269	3.30453e-20	417	0.37	0.0027
chr11_72674919_72675205	-0.192291	1.43636e-06	0	0	0	FALSE	PDE2A	-2.32778	1.96915e-22	328	0.42	0.00049
chr11_72676020_72676303	-0.189643	2.78788e-07	0	0	0	FALSE	PDE2A	-2.32778	1.96915e-22	1429	0.58	6.7e-07
chr11_89498397_89498682	-0.271536	0	0	0	0	FALSE	NOX4	2.79102	1.4362e-29	210	-0.53	5.4e-06
chr11_89637718_89638400	-0.225919	2.42424e-08	0	0	0	FALSE	FOLH1B	-3.48693	1.78511e-16	-837	0.69	2.2e-10
chr11_102680653_102680982	-0.24157	1.81818e-08	0	0	0	FALSE	AP000851.2	-1.94091	0.0108712	-328	0.49	3.5e-05
chr11_115581965_115582212	-0.252655	1.21212e-07	1	0	1	FALSE	AP003174.1	1.57201	0.00283623	-85	-0.37	0.0022
chr11_117878201_117878953	-0.275834	2.66667e-07	0	0	0	FALSE	FXYD6	-1.31302	4.82997e-08	715	0.45	0.00017
chr11_118402802_118402998	-0.166677	3.57576e-07	2	2	4	FALSE	ATP5MG	-0.562643	0.0041854	1648	-0.39	0.0039
chr11_118529284_118529576.2	0.203256	1.21212e-08	0	1	1	FALSE	TTC36	-3.62464	5.57983e-14	1812	-0.74	0
chr11_119067007_119067220	-0.243846	1.57576e-07	2	3	5	FALSE	VPS11	0.605434	2.43714e-14	-472	-0.46	0.00036
chr11_119068364_119068697	-0.228606	6.06061e-09	2	2	4	FALSE	VPS11	0.605434	2.43714e-14	672	-0.47	0.00015
chr11_125905233_125905418	-0.160382	1.0303e-07	0	0	0	FALSE	DDX25	-1.2483	0.000370432	1885	0.33	0.006
chr12_2876040_2876309	-0.221882	9.09091e-07	2	0	2	FALSE	RHNO1	1.03885	3.10923e-14	0	-0.73	0
chr12_2876040_2876309.1	-0.221882	9.09091e-07	2	0	2	FALSE	FOXM1	3.66025	6.23014e-42	-846	-0.72	0
chr12_2877946_2878599.1	-0.151114	3.63636e-07	2	5	7	FALSE	FOXM1	3.66025	6.23014e-42	791	-0.54	1.4e-05
chr12_2877946_2878599.2	-0.151114	3.63636e-07	2	5	7	FALSE	RHNO1	1.03885	3.10923e-14	1688	-0.58	2.2e-06
chr12_6764847_6765221	-0.20322	0	3	1	4	FALSE	PTMS	-1.08039	1.60823e-09	-295	0.42	0.00055
chr12_7890707_7890849	-0.183539	1.51515e-06	2	4	6	FALSE	SLC2A14	2.72464	4.95407e-08	-299	-0.41	0.00055
chr12_8787121_8787332	-0.16855	5.81212e-06	0	0	0	TRUE	AC092490.1	3.15434	5.34545e-09	-925	-0.46	0.00013
chr12_9734474_9735138	-0.273065	6e-07	0	0	0	FALSE	CLECL1	-1.07917	0.000221193	1175	0.47	7.7e-05
chr12_9950825_9951847	-0.255671	2.60606e-07	0	1	1	FALSE	CLEC12A	-2.43318	1.82055e-15	0	0.44	0.00058
chr12_10029720_10030787	-0.283726	4.90909e-07	0	0	0	FALSE	CLEC9A	-1.66726	6.19328e-06	0	0.51	1.5e-05
chr12_10031237_10031839	-0.266961	1.1697e-06	0	0	0	FALSE	CLEC9A	-1.66726	6.19328e-06	560	0.54	2.3e-06
chr12_10391020_10391395	-0.274379	1.33333e-07	0	0	0	FALSE	KLRK1	-2.1711	2.50757e-08	-479	0.36	0.0032
chr12_10422073_10422343	-0.207078	1.57576e-07	0	0	0	FALSE	KLRC3	-1.1282	0.0148974	1478	0.33	0.0066
chr12_10452425_10452961	-0.261035	3.15152e-07	0	0	0	FALSE	KLRC1	-1.09802	0.00143555	-1724	0.38	0.0016
chr12_20809236_20809746	-0.267245	7.21212e-07	0	0	0	FALSE	SLCO1B3	-3.36248	3.64865e-11	-956	0.53	5.5e-06
chr12_27974575_27974885	0.205841	4.37576e-06	1	0	1	FALSE	PTHLH	2.56814	1.16664e-08	1870	0.42	0.00048
chr12_30924327_30925486	-0.248224	2.78788e-07	0	0	0	FALSE	TSPAN11	-0.972825	0.0345078	-942	0.52	7.8e-06
chr12_41187382_41187682	-0.238727	7.21212e-07	0	0	0	FALSE	PDZRN4	-2.0686	0.000122614	-766	0.72	1.3e-11
chr12_49569254_49569485.1	-0.183977	1.21212e-08	0	0	0	FALSE	MCRS1	0.830349	1.1699e-23	1101	-0.53	1.3e-05
chr12_50033082_50033256	0.194085	6.95152e-06	0	1	1	TRUE	RACGAP1	2.53591	2.73143e-63	0	0.48	5e-05
chr12_51849299_51849503	-0.244158	3.60606e-06	0	2	2	TRUE	FIGNL2	2.06974	4.52494e-06	533	-0.61	2e-07
chr12_54548646_54548700	-0.228108	8.14545e-06	0	0	0	FALSE	PDE1B	-1.21504	1.05006e-11	-650	0.34	0.0051
chr12_56223711_56223953	-0.153433	1.0303e-07	2	3	5	TRUE	NABP2	1.00214	1.73879e-15	1696	-0.55	6e-06
chr12_56448127_56448501	-0.159616	9.09091e-08	1	3	4	FALSE	TIMELESS	1.03665	1.85576e-14	-902	-0.52	1e-05
chr12_56993381_56993794	0.181317	2.45455e-06	0	0	0	FALSE	GPR182	-4.60212	7.63741e-31	-652	-0.47	8.2e-05
chr12_57631813_57632087	0.247083	4.78788e-07	0	1	1	TRUE	B4GALNT1	4.15729	2.08279e-22	-1268	0.48	5.4e-05
chr12_64758544_64758618	-0.181008	3.84848e-06	2	2	4	FALSE	GNS	1.09207	3.68432e-11	-829	-0.4	0.00084
chr12_64759871_64760750	-0.211877	6.06061e-09	3	5	8	FALSE	GNS	1.09207	3.68432e-11	424	-0.52	8.6e-06
chr12_66188086_66188283	-0.225417	4.54545e-07	0	2	2	FALSE	IRAK3	-0.825132	0.000675259	-596	0.32	0.0098
chr12_66188495_66188697	-0.222931	1.0303e-07	0	3	3	FALSE	IRAK3	-0.825132	0.000675259	-182	0.35	0.0043
chr12_70636691_70637216	-0.295823	1.51515e-07	1	3	4	FALSE	PTPRB	-1.42636	1.90281e-09	-224	0.39	0.0012
chr12_76877390_76877681	-0.255576	2.48485e-07	0	2	2	FALSE	CSRP2	1.32582	4.05954e-07	-1379	-0.62	7.8e-08
chr12_93314218_93314572	-0.199026	6.06061e-08	1	1	2	FALSE	AC124947.2	1.41329	2.98588e-06	-237	-0.62	4.8e-08
chr12_94150703_94151928	-0.191131	2.42424e-08	3	5	8	TRUE	PLXNC1	1.98147	7.26345e-14	1980	-0.5	2.2e-05
chr12_94458669_94458716	-0.210057	7.69697e-07	1	0	1	FALSE	CEP83	0.661901	2.39339e-11	-1272	-0.62	7.6e-08
chr12_94647536_94649341	-0.170786	1.27273e-07	2	3	5	FALSE	TMCC3	0.924457	2.56861e-06	-1221	-0.52	1.3e-05
chr12_94650935_94651333	-0.179092	1.27273e-07	1	2	3	FALSE	TMCC3	0.924457	2.56861e-06	373	-0.44	0.00028
chr12_96906557_96906744	-0.169639	3.57576e-07	3	5	8	FALSE	NEDD1	0.758686	7.74399e-12	-479	-0.55	2.2e-06
chr12_104213654_104214500	-0.256261	1.27273e-07	0	0	0	FALSE	TXNRD1	2.08675	1.32919e-18	-1279	-0.63	3e-08
chr12_106137667_106138115	-0.155661	3.0303e-08	2	2	4	FALSE	NUAK1	1.08567	1.80453e-10	-1918	-0.5	2.3e-05
chr12_109307232_109307539	-0.168645	3.1697e-06	0	1	1	FALSE	FOXN4	3.0549	6.82915e-09	-1681	-0.46	9.8e-05
chr12_109714923_109715630	-0.176458	6.06061e-09	3	2	5	TRUE	FAM222A	2.02366	2.08183e-18	695	-0.59	3.5e-07
chr12_109831286_109831509	0.178814	1.58788e-06	0	1	1	FALSE	TRPV4	-0.838342	0.0297596	-1892	-0.42	0.00051
chr12_110279709_110280013	-0.192521	1.27273e-07	0	4	4	FALSE	ATP2A2	0.842586	1.38658e-07	-743	-0.56	1.8e-06
chr12_110469529_110469814.1	-0.212607	1.18182e-06	3	5	8	FALSE	FAM216A	0.508277	0.0107251	1165	-0.37	0.0048
chr12_111600767_111600919.1	-0.204381	1.2e-06	2	3	5	FALSE	ATXN2-AS	0.61371	0.0321068	1269	-0.45	0.00038
chr12_113967814_113968706	-0.16098	3.15152e-07	0	0	0	FALSE	RBM19	0.604241	2.42291e-06	1443	-0.48	4.8e-05
chr12_120366995_120367324	-0.162031	2.07879e-06	0	1	1	FALSE	MSI1	3.02871	5.92143e-09	-1856	-0.33	0.0063
chr12_121711515_121711878	-0.15933	5.15152e-07	3	2	5	FALSE	TMEM120B	0.593435	0.000908678	-874	-0.53	5.3e-06
chr12_122267375_122267698	-0.155665	4.24242e-07	2	2	4	FALSE	VPS33A	0.785419	2.05696e-12	854	-0.63	4.4e-08
chr12_130952094_130952842	-0.222158	5.45455e-08	0	0	0	FALSE	ADGRD1	1.4881	5.49802e-05	-1065	-0.34	0.0052
chr12_132957209_132957413	-0.26989	2.6e-06	0	0	0	FALSE	ZNF605	0.88531	2.09658e-07	903	-0.46	0.00022
chr13_32316450_32316709	-0.223166	0	3	5	8	FALSE	BRCA2	1.52009	1.06196e-16	976	-0.5	2.9e-05
chr13_52456744_52457212.1	-0.213491	0	0	2	2	FALSE	AL359513.1	0.784999	0.01144	1413	-0.62	1.4e-07
chr13_57632639_57634795	0.22944	1.27273e-07	0	1	1	TRUE	PCDH17	0.973803	1.84965e-05	829	0.57	9.1e-07
chr13_71014921_71015086	-0.222577	4.2303e-06	1	0	1	FALSE	LINC00348	2.66205	0.000460154	-55	-0.44	0.00022
chr13_75548591_75549136.1	-0.161161	1.14545e-06	3	3	6	FALSE	AL137782.1	-0.873194	0.00166705	-637	-0.52	2.9e-05
chr13_75634320_75634478	-0.239137	4.12121e-07	0	0	0	FALSE	LMO7-AS1	0.850254	0.0238839	-1516	-0.32	0.009
chr13_77974965_77975690	-0.267123	7.33333e-07	0	0	0	FALSE	EDNRB	-1.1991	2.35907e-09	0	0.45	0.00019
chr13_100088021_100088317	-0.267426	9.69697e-07	2	2	4	FALSE	AL355338.1	4.08935	5.20863e-10	-531	-0.42	0.001
chr14_20801720_20801890	-0.259838	5e-06	1	0	1	FALSE	RNASE1	1.3941	2.98078e-07	-1388	-0.37	0.0024
chr14_21025962_21026197	0.275201	1.15758e-06	1	3	4	TRUE	AL161668.4	-2.49295	2.16299e-09	1790	-0.59	7e-07
chr14_21025962_21026197.1	0.275201	1.15758e-06	1	3	4	TRUE	TPPP2	-2.93108	1.36873e-15	1853	-0.63	7e-08
chr14_21511598_21512065	-0.184977	0	3	4	7	FALSE	METTL3	0.5657	3.85184e-06	223	-0.55	2.6e-06
chr14_21641831_21642050	-0.274984	1.27273e-07	0	0	0	FALSE	TRAV1-2	-1.20246	0.00357409	-839	0.38	0.0014
chr14_21642955_21643644	-0.254044	1e-06	0	0	0	FALSE	TRAV1-2	-1.20246	0.00357409	66	0.35	0.0044
chr14_22094702_22095163	-0.185443	6.22424e-06	0	0	0	FALSE	TRDV1	-2.25927	1.55235e-07	-869	0.46	0.00011
chr14_22096480_22096554	-0.222569	1.70909e-06	0	0	0	FALSE	TRDV1	-2.25927	1.55235e-07	448	0.36	0.0029
chr14_22449868_22450121	-0.257959	1.27273e-07	0	0	0	FALSE	TRDJ1	-1.9973	8.5342e-08	0	0.36	0.0032
chr14_22462095_22462646	-0.235763	3.87879e-07	0	0	0	FALSE	TRDC	-2.17505	2.42978e-18	-286	0.55	3.3e-06
chr14_23954913_23955192	0.216212	5.0303e-07	0	1	1	FALSE	DHRS4	-0.855517	2.8952e-06	1327	-0.4	0.00086
chr14_45137172_45137355	-0.178792	1.27273e-07	0	1	1	FALSE	FANCM	0.820922	4.05756e-11	1232	-0.47	0.00018
chr14_51826218_51826735	-0.262189	1.27273e-07	0	0	0	FALSE	GNG2	-0.733157	0.000675069	23	0.43	0.0003
chr14_54903468_54903686	-0.192572	2.66667e-07	3	5	8	FALSE	GCH1	-2.28433	1.5883e-30	616	0.61	1.3e-07
chr14_55191968_55192313	-0.185883	4.24242e-08	1	4	5	FALSE	DLGAP5	4.01926	4.5858e-49	290	-0.66	2.9e-09
chr14_56119791_56119854	0.160961	3.30303e-06	1	4	5	FALSE	PELI2	-1.45153	2.29435e-07	1977	-0.36	0.0033
chr14_73490188_73490542	-0.160142	4.24242e-07	0	2	2	FALSE	RIOX1	0.675242	4.07086e-07	-422	-0.53	6.4e-06
chr14_73951030_73951561.1	-0.15771	0	2	3	5	FALSE	COQ6	-0.51197	4.07542e-05	1104	-0.39	0.0026
chr14_89956847_89957008	-0.221488	7.33333e-07	2	4	6	FALSE	TDP1	0.582265	1.79935e-07	1908	-0.38	0.0017
chr14_90827560_90827806	-0.167057	1.0303e-07	1	2	3	FALSE	LINC02321	1.56468	3.40437e-06	-322	-0.57	4.6e-07
chr14_94025864_94026128	-0.180908	6.06061e-09	1	2	3	FALSE	OTUB2	2.06143	1.83029e-25	-201	-0.67	0
chr14_95709758_95712941	-0.269823	2.42424e-07	0	0	0	FALSE	TCL1A	-1.6873	0.000652993	-1255	0.37	0.0026
chr14_96796069_96796932	-0.24051	0	1	0	1	FALSE	VRK1	0.967219	7.80059e-12	-372	-0.54	4.4e-06
chr14_100324345_100324656	0.260719	5.93939e-07	0	3	3	FALSE	SLC25A47	-3.07736	1.30281e-09	1008	-0.68	0
chr14_100779895_100780089	-0.289698	8.53939e-06	0	0	0	FALSE	MEG3	-0.998936	0.0309421	485	0.63	3.8e-08
chr14_105020000_105020324	-0.157215	1.49091e-06	1	2	3	TRUE	CDCA4	1.54226	2.69502e-21	-824	-0.66	2.8e-09
chr14_105169728_105170990	-0.211485	1.51515e-07	0	0	0	FALSE	JAG2	1.39137	5.10184e-09	904	-0.53	6.7e-06
chr14_106061509_106062332	-0.161739	1.0303e-07	0	0	0	FALSE	IGHV3-7	-1.99247	0.000162266	-351	0.36	0.0033
chr14_106130180_106130534	-0.187187	5.0303e-07	0	0	0	FALSE	IGHV3-13	-2.03933	0.000531773	108	0.48	4.6e-05
chr14_106186298_106186939	-0.198217	0	0	0	0	FALSE	IGHV1-18	2.57516	0.000157287	904	0.38	0.0016
chr14_106277389_106277696	-0.219388	0	0	0	0	FALSE	IGHV1-24	-2.03458	0.000492531	346	0.59	2.3e-07
chr14_106277909_106278314	-0.200612	0	0	0	0	FALSE	IGHV1-24	-2.03458	0.000492531	866	0.46	0.00011
chr14_106324106_106324529	-0.297248	3.93939e-07	0	0	0	FALSE	IGHV4-28	-1.77653	0.00527606	-231	0.43	0.00031
chr14_106335263_106335580	-0.23294	2.32121e-06	0	0	0	FALSE	IGHV3-30	2.57593	0.000297202	-33	0.43	0.0003
chr14_106361627_106362163	-0.218773	6.06061e-08	0	0	0	FALSE	IGHV3-33	1.48616	0.0431642	1303	0.41	0.00066
chr14_106481863_106482171	-0.327614	1e-06	0	0	0	TRUE	LINC00221	8.02898	1.88896e-13	-268	-0.45	0.00018
chr15_20505065_20505333	-0.226657	3.0303e-08	1	1	2	FALSE	HERC2P3	1.1328	0.000262409	-847	-0.49	3.9e-05
chr15_22840186_22840383	-0.226826	1.69697e-06	1	3	4	FALSE	NIPA2	0.526526	1.61234e-05	1545	-0.53	8.2e-06
chr15_29676126_29676453	-0.241983	2.78788e-07	1	1	2	FALSE	AC022613.1	1.04101	1.66447e-05	1136	-0.6	1.7e-07
chr15_41513419_41513750	0.254797	2.28485e-06	0	1	1	TRUE	LTK	-1.82082	2.80514e-05	-137	-0.37	0.0025
chr15_41544489_41544830	-0.221874	0	3	4	7	FALSE	RPAP1	0.672464	1.83033e-08	220	-0.55	2.8e-06
chr15_41920412_41921125	-0.189078	4.24242e-08	0	0	0	FALSE	EHD4-AS1	1.0621	0.00253212	-292	-0.39	0.0013
chr15_43775879_43776500.1	-0.178264	3.0303e-07	2	4	6	TRUE	ELL3	1.39031	0.00371979	-1043	-0.38	0.003
chr15_43778064_43778164	-0.173221	7.10303e-06	2	0	2	FALSE	ELL3	1.39031	0.00371979	521	-0.4	0.002
chr15_43823841_43823956	-0.2086	2.42424e-08	2	3	5	FALSE	MFAP1	0.597152	2.23819e-11	-846	-0.57	1.2e-06
chr15_44428798_44429319	-0.176108	1.43636e-06	2	3	5	FALSE	CTDSPL2	0.527591	2.04264e-07	1564	-0.51	1.4e-05
chr15_48332528_48333063.1	-0.211496	3.39394e-07	1	1	2	FALSE	DUT	0.74595	1.72184e-06	1517	-0.56	2.8e-06
chr15_51621192_51621570	-0.219312	5.15152e-07	2	3	5	FALSE	DMXL2	0.561814	0.000149496	-1263	-0.52	1.2e-05
chr15_51969507_51969835	-0.192259	2.24242e-07	1	0	1	FALSE	LEO1	0.554524	9.52026e-06	-1971	-0.56	2e-06
chr15_52294443_52294975	-0.17116	6.06061e-08	3	1	4	FALSE	MYO5C	1.30733	6.36674e-19	-823	-0.67	0
chr15_55409171_55409353	-0.190101	8.90909e-07	2	2	4	FALSE	C15orf65	0.582852	0.0137956	623	-0.37	0.0046
chr15_56245291_56245492	-0.238196	6.06061e-09	1	2	3	FALSE	TEX9	0.572601	0.0114475	1282	-0.62	5.2e-08
chr15_63382475_63382724	-0.172326	6.90909e-07	0	0	0	FALSE	CA12	5.67669	3.41641e-28	314	-0.45	0.00013
chr15_64356865_64357659	-0.199399	1.15152e-07	1	4	5	FALSE	CSNK1G1	0.703023	4.18794e-12	606	-0.49	3.8e-05
chr15_64388333_64388560	-0.198994	1.57576e-07	2	3	5	FALSE	TRIP4	0.541191	2.33347e-14	585	-0.51	3.2e-05
chr15_64388333_64388560.1	-0.198994	1.57576e-07	2	3	5	FALSE	PCLAF	2.26138	1.42527e-23	646	-0.47	0.00016
chr15_65077772_65078227	0.257179	6.54545e-07	0	0	0	TRUE	RASL12	1.81961	4.8725e-13	1082	0.48	5.4e-05
chr15_67253545_67253810.1	-0.153079	1.33333e-07	1	2	3	FALSE	AAGAB	0.782307	2.98913e-13	-1385	-0.67	0
chr15_69413529_69413823	-0.190082	2.78788e-07	0	0	0	FALSE	KIF23	3.56367	2.43452e-43	-423	-0.38	0.0018
chr15_74462003_74462261.1	-0.179925	6.06061e-09	3	2	5	FALSE	UBL7	0.663907	1.97527e-07	821	-0.47	0.00018
chr15_74462523_74462663.1	-0.231265	4.84848e-07	1	1	2	FALSE	UBL7	0.663907	1.97527e-07	1341	-0.49	7e-05
chr15_82047530_82048023	0.219139	3.0303e-08	1	2	3	TRUE	MEX3B	1.17437	0.000113038	1389	0.34	0.0051
chr15_89911865_89912166.1	-0.239704	6.06061e-09	1	3	4	FALSE	ARPIN	0.8053	4.23666e-12	-790	-0.61	2.8e-07
chr15_90929153_90929733	-0.192594	2.42424e-08	2	4	6	FALSE	UNC45A	0.695498	3.2506e-11	-447	-0.53	6.1e-06
chr15_90955579_90955864	-0.233783	0	2	3	5	FALSE	RCCD1	0.714934	8.55681e-12	709	-0.71	0
chr15_90956517_90957160	0.334292	1.85455e-06	0	1	1	TRUE	RCCD1	0.714934	8.55681e-12	1647	0.48	6.4e-05
chr15_90995248_90995844	-0.181206	0	2	3	5	FALSE	PRC1	2.18611	2.36975e-08	0	-0.62	4.6e-08
chr15_96172625_96172768	0.189943	1e-06	2	3	5	FALSE	AC012409.1	-2.88399	6.96977e-18	1044	-0.6	8e-08
chr15_96328011_96328520	0.1986	0	1	2	3	FALSE	NR2F2-AS1	-0.876389	3.28698e-05	650	-0.46	0.00011
chr15_96352718_96352878	0.221405	5.15152e-07	0	0	0	FALSE	AC087477.2	-1.85846	1.11276e-12	-1359	-0.37	0.0027
chr15_96353432_96353581	0.174999	6.54545e-07	0	3	3	TRUE	AC087477.2	-1.85846	1.11276e-12	-656	-0.5	2.6e-05
chr15_100918715_100919175	0.16353	1.18182e-06	0	3	3	TRUE	AC015712.2	-1.22038	0.000359017	-108	-0.37	0.0042
chr15_100920405_100921207	-0.308459	1.57576e-07	0	1	1	FALSE	AC015712.2	-1.22038	0.000359017	1122	0.39	0.0026
chr16_178677_179201	-0.162784	2e-06	0	0	0	FALSE	HBA1	-3.13199	6.52578e-23	1997	0.5	2.3e-05
chr16_676294_676572	-0.171715	3.93939e-07	0	0	0	FALSE	RHBDL1	1.5491	5.49784e-08	628	-0.55	2.3e-06
chr16_1147671_1151259	-0.217977	2.12121e-07	0	0	0	TRUE	CACNA1H	-1.34017	0.00106961	-1862	0.57	8.5e-07
chr16_1298542_1299122	-0.252669	1.2303e-06	0	2	2	FALSE	AC120498.4	1.1267	0.00036913	-44	-0.51	1.6e-05
chr16_1792385_1793077	0.168286	1.33333e-07	0	1	1	TRUE	IGFALS	-3.44312	1.40139e-18	-1894	-0.68	0
chr16_2859254_2860910	-0.303732	2.54545e-07	0	0	0	FALSE	PRSS22	-2.68988	1.94874e-06	1084	0.59	1.8e-07
chr16_20698050_20698244	-0.227781	5.39394e-07	0	0	0	FALSE	ACSM1	1.19857	0.0147574	-646	-0.55	2.7e-06
chr16_23679476_23679790	-0.224917	3.81818e-07	1	1	2	FALSE	PLK1	3.15187	6.31105e-36	1820	-0.68	0
chr16_23834356_23834958	-0.273907	2.60606e-07	0	0	0	FALSE	PRKCB	-1.09892	0.00021402	-988	0.47	7.4e-05
chr16_28536913_28537201	-0.260586	2.60606e-07	3	3	6	FALSE	NUPR1	0.920602	0.000549133	-1973	-0.59	3.9e-07
chr16_30052353_30052793	-0.245841	0	2	2	4	FALSE	AC093512.2	1.12994	5.48502e-05	-297	-0.42	0.00043
chr16_30894554_30895021.1	-0.225138	6.66667e-08	2	4	6	TRUE	CTF1	-1.67816	3.8943e-09	-1586	0.53	1.1e-05
chr16_32188922_32189081	-0.250062	2.24242e-07	0	0	0	FALSE	HERC2P4	1.84141	0.00173565	815	-0.4	0.00096
chr16_54288091_54288453	0.213438	6.07273e-06	0	0	0	TRUE	IRX3	2.62852	1.75092e-10	1328	0.42	0.00054
chr16_58294499_58294675	-0.19925	5.25455e-06	0	0	0	FALSE	GINS3	1.2287	1.80627e-16	-405	-0.39	0.0015
chr16_67430131_67430428	-0.162428	1.89697e-06	1	2	3	FALSE	HSD11B2	0.604275	0.00051758	-224	-0.37	0.0023
chr16_84296632_84296845	-0.326825	1.77576e-06	0	0	0	FALSE	WFDC1	-1.47076	3.33416e-06	1986	0.48	5.3e-05
chr16_85688063_85688524	-0.19429	6.66667e-08	0	0	0	FALSE	GINS2	1.77063	1.41336e-16	-1549	-0.61	1.3e-07
chr16_88879325_88879657	-0.224787	2.72727e-07	0	0	0	TRUE	AC092384.2	-3.24038	3.28138e-19	-1381	0.68	3.7e-10
chr16_88882164_88882267	-0.169655	3.2e-06	0	0	0	FALSE	AC092384.2	-3.24038	3.28138e-19	1126	0.46	0.00012
chr16_88977274_88979285	-0.259625	2.66667e-07	0	0	0	FALSE	CBFA2T3	-2.09133	5.11083e-15	70	0.48	5.2e-05
chr16_89815332_89815782	-0.161454	3.33333e-07	0	2	2	FALSE	FANCA	1.11499	7.43549e-15	-875	-0.53	7.9e-06
chr16_89817245_89817829	-0.213938	0	1	2	3	TRUE	SPIRE2	0.538872	0.00564134	-350	-0.48	9.6e-05
chr16_89817245_89817829.1	-0.213938	0	1	2	3	TRUE	FANCA	1.11499	7.43549e-15	588	-0.53	1.5e-05
chr16_90020398_90020673	-0.162797	1.69697e-06	2	1	3	FALSE	DBNDD1	2.17162	4.0454e-08	270	-0.56	2.8e-06
chr16_90091553_90092480	-0.187754	1.81818e-08	0	0	0	FALSE	PRDM7	3.49615	1.12648e-08	0	-0.34	0.005
chr17_7232298_7232554	-0.208173	6.06061e-09	0	1	1	FALSE	DVL2	0.83462	2.18976e-11	-1991	-0.53	6e-06
chr17_7232811_7233529	-0.221835	0	2	3	5	FALSE	DVL2	0.83462	2.18976e-11	-1016	-0.63	2.7e-08
chr17_7235660_7235918	-0.215474	8.48485e-08	0	2	2	FALSE	DVL2	0.83462	2.18976e-11	1115	-0.52	9.5e-06
chr17_9821160_9821410	-0.266654	1.4e-06	0	0	0	FALSE	GLP2R	-2.42513	3.65694e-08	-796	0.63	1.9e-08
chr17_9822543_9823256	-0.219399	2.72727e-07	0	0	0	FALSE	GLP2R	-2.42513	3.65694e-08	337	0.59	1.7e-07
chr17_15684467_15684730	-0.157161	6.06061e-09	1	1	2	FALSE	TRIM16	2.76158	8.1647e-18	156	-0.49	4.4e-05
chr17_19386011_19386370	-0.213166	1.24242e-06	0	1	1	FALSE	MFAP4	-1.40543	0.00431337	-870	0.37	0.0022
chr17_19410078_19410264	-0.193479	1.15152e-06	0	0	0	FALSE	RNF112	-1.03182	0.0042428	-861	0.38	0.0019
chr17_19412551_19412674	-0.218399	4.7697e-06	0	0	0	FALSE	RNF112	-1.03182	0.0042428	1426	0.38	0.0017
chr17_27333730_27333940	-0.158316	2.55152e-06	3	2	5	FALSE	AC026254.2	1.01609	0.000997989	474	-0.39	0.0011
chr17_28725196_28725524	-0.211388	0	3	3	6	TRUE	NEK8	0.560763	0.000132468	-373	-0.58	6.8e-07
chr17_28904441_28904679	-0.157963	1.24848e-06	0	0	0	FALSE	DHRS13	1.36963	4.24357e-08	1370	-0.41	0.00076
chr17_31902017_31902399	-0.224906	0	3	4	7	FALSE	UTP6	0.724973	3.24024e-19	252	-0.64	2.2e-08
chr17_32349437_32349505.1	-0.217399	6.03636e-06	2	3	5	FALSE	ZNF207	0.672451	1.26922e-22	-612	-0.4	0.0019
chr17_32443585_32443779	-0.169965	1.93333e-06	0	0	0	FALSE	PSMD11	0.537771	3.93099e-08	-482	-0.46	0.00013
chr17_35122053_35122362	-0.270768	1.24242e-06	0	0	0	FALSE	RAD51D	0.578282	1.32538e-06	531	-0.37	0.0023
chr17_36543654_36543878	-0.162143	3.87879e-07	2	3	5	FALSE	MYO19	1.19298	4.60395e-16	219	-0.53	1.2e-05
chr17_36949819_36950208	-0.166943	1.69697e-07	2	3	5	FALSE	AATF	0.82839	1.06649e-13	944	-0.59	3.9e-07
chr17_38351368_38351512	-0.210387	6.06061e-09	3	5	8	FALSE	SOCS7	1.11979	7.21925e-10	-716	-0.46	0.00014
chr17_40415683_40416225	-0.165574	0	2	1	3	FALSE	TOP2A	4.29942	1.43109e-62	-1725	-0.53	6.8e-06
chr17_41931949_41932575	-0.197957	0	0	0	0	FALSE	ACLY	1.58201	5.69398e-31	1407	-0.64	2.2e-08
chr17_42458213_42458522	-0.179236	2.24242e-07	2	3	5	FALSE	ATP6V0A1	0.638052	8.7176e-05	-322	-0.55	3.3e-06
chr17_42658863_42658956	-0.159241	2.28485e-06	1	1	2	FALSE	TUBG2	0.545128	0.0023588	-349	-0.5	2e-05
chr17_42772831_42772931	-0.244778	0	2	0	2	FALSE	VPS25	0.576213	7.13672e-11	-505	-0.75	0
chr17_43023983_43024184	-0.166474	7.27273e-08	0	1	1	FALSE	VAT1	1.10386	1.27411e-10	-939	-0.4	0.0022
chr17_43387734_43388162	-0.189194	9.09091e-08	2	3	5	FALSE	LINC00910	0.589188	0.00923733	-1037	-0.43	0.00038
chr17_43484672_43485155	-0.217422	0	1	3	4	FALSE	DHX8	0.707326	7.45667e-11	807	-0.57	1.1e-06
chr17_44023209_44023460	0.171201	0	0	0	0	FALSE	TMEM101	0.941552	4.17109e-21	-486	0.65	5.8e-09
chr17_44168809_44169340	-0.238696	0	0	0	0	FALSE	ASB16	1.54684	4.53772e-08	-1107	-0.52	1.1e-05
chr17_44323744_44323978	-0.203884	5.81818e-07	1	1	2	FALSE	SLC25A39	0.814687	8.19614e-19	-892	-0.63	3.9e-08
chr17_44364463_44364841	-0.209306	1.81818e-08	0	0	0	FALSE	FAM171A2	2.3843	1.22133e-14	588	-0.37	0.0023
chr17_44845506_44847364	-0.213073	4.18182e-07	0	0	0	FALSE	HIGD1B	2.64048	4.75334e-23	0	-0.42	0.00038
chr17_44898374_44898614	-0.264508	1.27273e-07	2	3	5	FALSE	EFTUD2	0.860256	5.24991e-18	-1048	-0.55	8.1e-06
chr17_45371127_45371613	-0.249648	4.30303e-07	3	5	8	FALSE	AC003070.2	1.10942	0.0105852	-444	-0.59	2.3e-07
chr17_45619510_45619708	-0.172122	5.45455e-08	1	0	1	FALSE	LINC02210	0.797133	0.000115198	-620	-0.34	0.0058
chr17_47695165_47695626	0.225575	1.44242e-06	1	2	3	TRUE	TBKBP1	0.590147	0.00143718	1084	0.34	0.0052
chr17_48430511_48430743	-0.194919	4.24242e-06	0	0	0	FALSE	SKAP1	-2.37838	5.59209e-16	236	0.49	3.3e-05
chr17_48906660_48907110	-0.197244	5.15152e-07	1	0	1	FALSE	UBE2Z	0.637429	4.68226e-12	-1259	-0.39	0.003
chr17_51152384_51152628	-0.186414	1.39394e-07	2	0	2	FALSE	NME1	0.785393	0.000116444	-908	-0.54	8.2e-06
chr17_56959997_56960518	-0.163094	9.0303e-07	1	1	2	FALSE	COIL	0.503078	9.80816e-10	-536	-0.55	2.8e-06
chr17_58418512_58418984	-0.178026	5.45455e-08	0	0	0	FALSE	RNF43	0.825848	0.00221077	917	-0.55	2.9e-06
chr17_59153896_59153960.1	-0.15817	3.95152e-06	2	2	4	FALSE	PRR11	2.53711	1.20966e-28	-1539	-0.43	0.00066
chr17_59209256_59209719	-0.161975	0	2	3	5	FALSE	SMG8	0.720545	6.35146e-11	0	-0.66	1.5e-09
chr17_59210724_59211332	-0.160167	6.06061e-09	1	2	3	FALSE	SMG8	0.720545	6.35146e-11	1324	-0.61	1.2e-07
chr17_59219544_59220157	-0.161662	3.27273e-07	3	1	4	FALSE	GDPD1	1.63158	3.79732e-22	-310	-0.64	2.3e-08
chr17_60079442_60079920	-0.209905	3.15152e-07	1	2	3	FALSE	HEATR6	0.798684	3.46112e-14	511	-0.43	0.0008
chr17_64495955_64496195	-0.181646	1.90303e-06	2	3	5	FALSE	POLG2	0.558847	0.000467311	-841	-0.53	7.3e-06
chr17_66303948_66304174	-0.153895	1.66667e-06	2	3	5	FALSE	PRKCA	0.616422	0.000598527	1312	-0.47	8.5e-05
chr17_73233565_73233692	-0.179316	8.9697e-07	0	3	3	FALSE	C17orf80	0.504935	4.00357e-08	1332	-0.49	4.1e-05
chr17_74324642_74325137	-0.239966	9.33333e-07	0	1	1	FALSE	KIF19	-2.87956	1.61947e-30	-1073	0.38	0.0017
chr17_74464458_74464887	-0.21094	6.06061e-07	1	0	1	FALSE	CD300A	-1.17308	5.27466e-05	-1512	0.4	0.001
chr17_75204470_75204802	-0.208838	9.09091e-08	3	2	5	FALSE	NUP85	0.528462	4.68146e-08	-857	-0.37	0.0022
chr17_75720016_75720565	-0.154669	8e-07	0	0	0	FALSE	ITGB4	1.59323	1.93153e-06	-763	-0.37	0.0024
chr17_76453675_76455019	-0.225156	3.0303e-08	0	0	0	FALSE	UBE2O	0.857344	1.44484e-12	469	-0.62	5.8e-08
chr17_77088122_77088452	-0.168369	6.54545e-07	2	3	5	FALSE	SNHG20	0.565842	0.0028934	1406	-0.38	0.004
chr17_78166878_78167992	-0.177136	8.24242e-07	0	0	0	FALSE	SYNGR2	0.737406	8.81223e-10	-566	-0.5	2.4e-05
chr17_78214781_78215714	-0.193072	0	2	0	2	FALSE	BIRC5	3.79396	1.10014e-46	595	-0.65	5.7e-09
chr17_79731457_79731918	-0.220355	1.93333e-06	1	1	2	FALSE	ENPP7	1.16171	0.011201	538	-0.39	0.0013
chr17_79732530_79732719	-0.268264	2.98788e-06	2	3	5	FALSE	ENPP7	1.16171	0.011201	1611	-0.48	6.5e-05
chr17_79775777_79776601	-0.18028	3.33333e-07	2	2	4	FALSE	CBX2	3.04124	1.63309e-19	-1531	-0.42	0.00046
chr17_80541755_80543065	-0.237112	1.81818e-08	0	0	0	FALSE	RPTOR	0.568067	5.06292e-05	-1754	-0.47	7.6e-05
chr17_80544153_80544563	-0.217034	0	0	1	1	FALSE	RPTOR	0.568067	5.06292e-05	-256	-0.47	7.2e-05
chr17_81308305_81308970	-0.215675	2.06061e-07	2	3	5	FALSE	LINC00482	1.18929	0.000133216	-278	-0.49	3.9e-05
chr17_81637596_81637865	-0.164709	2.06061e-07	0	1	1	FALSE	TSPAN10	0.808371	2.89172e-06	425	-0.41	0.00066
chr17_81667388_81667622	-0.175594	5.45455e-08	0	0	0	FALSE	OXLD1	0.599286	1.2304e-06	753	-0.64	2.6e-08
chr17_81667388_81667622.1	-0.175594	5.45455e-08	0	0	0	FALSE	CCDC137	0.947765	3.36736e-16	1024	-0.59	7.2e-07
chr17_81861869_81862975	-0.18267	3.27273e-07	2	3	5	FALSE	P4HB	0.710676	0.000440867	1175	-0.56	3.6e-06
chr17_81892417_81892719	-0.1741	5.93939e-07	1	1	2	FALSE	ALYREF	0.967281	6.89764e-17	831	-0.46	0.00022
chr17_81978418_81978584	-0.234581	1.27879e-06	2	3	5	FALSE	ASPSCR1	0.684973	0.00203894	1611	-0.39	0.0013
chr17_82646832_82647101	-0.231635	1.27879e-06	1	1	2	FALSE	WDR45B	0.628813	1.44073e-09	-1452	-0.57	8.1e-07
chr18_21598961_21599372	-0.217696	1.0303e-07	3	3	6	FALSE	ESCO1	0.599216	1.64751e-07	-1512	-0.54	4.3e-06
chr18_22349055_22349554	0.291688	3.81818e-07	2	5	7	TRUE	AC027449.1	-2.26046	3.33226e-10	803	-0.6	1.3e-07
chr18_23438485_23438760	-0.231443	4.23636e-06	0	0	0	FALSE	TMEM241	0.842979	8.85686e-08	524	-0.43	0.00041
chr18_26547273_26547999	0.205284	2.42424e-08	0	1	1	TRUE	AC007996.1	0.798189	0.000181698	1482	0.49	3.9e-05
chr18_59695581_59696054	-0.206672	1.2303e-06	0	2	2	FALSE	CCBE1	-4.31201	1.13811e-35	-1608	0.47	7.7e-05
chr19_544339_544982	-0.193931	2.60606e-07	0	0	0	FALSE	GZMM	-1.61067	8.46799e-10	305	0.5	2.3e-05
chr19_570497_570975	-0.207118	3.87879e-07	1	2	3	FALSE	BSG	0.930933	6.4814e-09	-302	-0.54	8.8e-06
chr19_570497_570975.1	-0.207118	3.87879e-07	1	2	3	FALSE	AC009005.1	1.92249	1.70153e-07	-1253	-0.57	1.6e-06
chr19_1457863_1458530	-0.215679	2.06061e-07	0	0	0	FALSE	AC027307.2	0.59099	0.000888409	-50	-0.41	0.00076
chr19_1458808_1459158	-0.191539	4.24242e-08	0	0	0	FALSE	AC027307.2	0.59099	0.000888409	228	-0.37	0.0026
chr19_2097833_2098295.1	-0.15783	5.45455e-08	0	0	0	FALSE	IZUMO4	-1.53118	4.10236e-10	1404	0.61	2.4e-07
chr19_2237312_2237673.1	-0.212682	6.06061e-09	2	3	5	TRUE	SF3A2	0.775372	1.12936e-07	808	-0.54	8.4e-06
chr19_2358435_2359732	-0.246141	0	0	0	0	TRUE	TMPRSS9	1.34398	0.000456201	-506	-0.37	0.0022
chr19_2474159_2474256	-0.162985	1.05455e-06	1	0	1	FALSE	GADD45B	-2.37922	9.46466e-32	-1866	0.5	2.4e-05
chr19_2740647_2741145	-0.190598	5.45455e-08	0	0	0	FALSE	SLC39A3	0.556751	4.24639e-06	495	-0.5	2.8e-05
chr19_2784735_2784936	-0.20172	3.82424e-06	0	2	2	FALSE	THOP1	-0.756761	6.8415e-06	-524	0.42	0.0011
chr19_4305486_4307115	-0.169697	1.81818e-08	0	0	0	FALSE	FSD1	-1.73112	3.69191e-09	886	0.39	0.0013
chr19_5576106_5576712	-0.205725	0	0	0	0	FALSE	SNRPEP4	0.886518	1.11203e-08	-226	-0.57	9.6e-07
chr19_5578662_5579084	-0.172096	3.0303e-08	0	0	0	FALSE	SNRPEP4	0.886518	1.11203e-08	1724	-0.44	0.00052
chr19_6996967_6997985	-0.24662	2.24242e-07	0	0	0	FALSE	ADGRE4P	-1.82485	8.13413e-11	0	0.32	0.0096
chr19_7702065_7703230	-0.251984	2.72727e-07	0	0	0	FALSE	FCER2	-1.31992	0.00170839	0	0.35	0.0046
chr19_7762618_7763258	-0.23987	5.75758e-07	0	1	1	FALSE	CLEC4M	-6.47692	1.44791e-28	0	0.52	7.1e-06
chr19_8577985_8578352	-0.150642	1.81818e-08	1	1	2	FALSE	MYO1F	-0.974444	8.03455e-05	408	0.48	5.5e-05
chr19_10011536_10011850	-0.172944	5.0303e-07	0	0	0	FALSE	COL5A3	1.94545	1.88597e-07	1065	-0.36	0.0034
chr19_11155001_11155361	-0.232248	0	0	2	2	FALSE	SPC24	3.15203	4.09748e-41	-447	-0.66	5.2e-10
chr19_11156076_11156540	-0.173373	2.42424e-08	2	4	6	TRUE	SPC24	3.15203	4.09748e-41	268	-0.72	0
chr19_12939772_12940117	-0.178361	6.06061e-09	2	2	4	FALSE	CALR	0.70977	3.28301e-05	1194	-0.63	4.1e-08
chr19_14137854_14138124	-0.207019	0	2	3	5	FALSE	ASF1B	2.76685	2.67553e-34	898	-0.69	0
chr19_14431500_14431717	-0.156007	3.15152e-07	0	0	0	FALSE	PKN1	0.8574	5.78995e-08	-1336	-0.41	0.00082
chr19_17376215_17377135	-0.242475	1.27273e-07	0	0	0	TRUE	PLVAP	2.864	5.07162e-36	-215	-0.47	7.3e-05
chr19_17377677_17378056	-0.246588	1.27273e-07	0	0	0	FALSE	PLVAP	2.864	5.07162e-36	327	-0.49	3.2e-05
chr19_17554771_17555096	-0.15641	6.06061e-08	2	0	2	FALSE	COLGALT1	0.766299	6.30027e-06	-498	-0.4	0.00083
chr19_18918017_18918756.1	-0.253829	0	2	3	5	FALSE	DDX49	0.690165	4.35152e-11	-919	-0.69	0
chr19_19516684_19517129	-0.163969	5.45455e-08	3	5	8	FALSE	NDUFA13	0.548752	0.0248978	948	-0.48	0.00019
chr19_19516684_19517129.1	-0.163969	5.45455e-08	3	5	8	FALSE	TSSK6	1.34578	1.75603e-12	999	-0.44	0.00066
chr19_20423013_20423109	-0.290671	1.57576e-07	2	2	4	FALSE	ZNF826P	2.20315	3.66354e-09	-1860	-0.35	0.0045
chr19_20564513_20564754	-0.263103	6.66667e-08	1	2	3	FALSE	ZNF737	0.649433	0.00684013	-1055	-0.41	0.00077
chr19_21083067_21083393	-0.264825	1.51515e-07	1	1	2	FALSE	ZNF714	2.09349	3.76356e-12	908	-0.34	0.0049
chr19_23073619_23073871	-0.252478	7.0303e-07	0	0	0	FALSE	AC074135.1	4.29013	2.66798e-10	-1330	-0.35	0.0039
chr19_23074369_23074894	-0.197994	2.05455e-06	0	0	0	FALSE	AC074135.1	4.29013	2.66798e-10	-307	-0.35	0.004
chr19_28606496_28607360	-0.251337	6.06061e-08	1	0	1	FALSE	AC079466.1	9.26409	9.5225e-33	0	-0.58	6.3e-07
chr19_32676028_32676972	0.318905	4.30303e-07	0	1	1	TRUE	ANKRD27	1.18488	6.14125e-21	0	0.49	4.6e-05
chr19_32677506_32677698	0.180015	3.46061e-06	0	0	0	FALSE	ANKRD27	1.18488	6.14125e-21	909	0.35	0.0036
chr19_33305443_33305704	-0.180791	1.27273e-07	0	2	2	FALSE	AC008738.2	1.01548	0.0146576	407	-0.44	0.00026
chr19_33904367_33904910	-0.253489	8.36364e-07	0	1	1	FALSE	AC008556.1	-2.8295	4.70508e-33	-1442	0.53	7.4e-06
chr19_35612328_35612382	-0.15891	1.57576e-07	1	1	2	FALSE	HAUS5	0.759173	2.06943e-07	-362	-0.6	1.6e-07
chr19_35773731_35773946	-0.194485	2.42424e-08	0	0	0	FALSE	ARHGAP33	0.874775	0.000975473	-586	-0.38	0.0017
chr19_36213887_36214129	-0.197584	5.02424e-06	3	5	8	FALSE	ZNF146	0.5151	9.84231e-09	-473	-0.42	0.00057
chr19_36490472_36490591.1	-0.289992	3.14545e-06	1	3	4	TRUE	AC092295.2	0.519703	0.0146372	823	-0.36	0.006
chr19_37720128_37720487	-0.221503	5.45455e-08	1	1	2	FALSE	ZNF607	1.31734	9.03568e-07	338	-0.34	0.0054
chr19_38646997_38647165	-0.194473	1.27273e-07	1	1	2	FALSE	ACTN4	0.540161	3.14903e-05	-484	-0.49	3.5e-05
chr19_39737222_39737666	-0.226123	1.27273e-07	0	0	0	FALSE	CLC	-3.1019	1.99149e-07	-362	0.44	0.00024
chr19_39738180_39739360	-0.204426	8.48485e-08	0	0	0	FALSE	CLC	-3.1019	1.99149e-07	152	0.48	5.3e-05
chr19_40592529_40593327	-0.151525	1.33333e-07	0	0	0	FALSE	LTBP4	-0.695167	0.0387937	0	0.37	0.0027
chr19_40593718_40594355	-0.185286	0	0	0	0	FALSE	LTBP4	-0.695167	0.0387937	835	0.39	0.0014
chr19_41547032_41547492	-0.245022	1.21212e-07	1	1	2	FALSE	AC243960.1	-1.18099	0.000529553	1840	0.52	9.5e-06
chr19_41795402_41795906	-0.19991	6.06061e-09	0	1	1	FALSE	CEACAM3	-1.65571	5.64906e-06	-531	0.49	2.6e-05
chr19_41797450_41798090	-0.239272	1.43636e-06	1	1	2	FALSE	CEACAM3	-1.65571	5.64906e-06	1013	0.52	6.1e-06
chr19_42389548_42390136	-0.282277	0	0	0	0	FALSE	CNFN	1.61446	8.55214e-05	-151	-0.38	0.0018
chr19_43755695_43756067	-0.222024	4.24242e-08	3	4	7	FALSE	SMG9	0.71686	1.17679e-08	705	-0.57	1.1e-06
chr19_43902148_43902640	-0.20769	3.15152e-07	2	1	3	TRUE	AC006213.3	1.56997	6.22703e-05	147	-0.39	0.0039
chr19_44954127_44954449	-0.217637	8.48485e-08	3	5	8	FALSE	CLPTM1	0.514392	0.000329584	-136	-0.56	3.4e-06
chr19_45002501_45002651	-0.184426	5.51515e-07	2	1	3	FALSE	RELB	0.924735	3.21625e-05	1071	-0.44	0.00024
chr19_45076856_45077025	-0.186769	0	1	2	3	FALSE	ZNF296	1.4545	2.25373e-06	268	-0.46	0.00011
chr19_45497884_45498023	0.159697	1.27273e-07	0	0	0	FALSE	RTN2	1.18135	1.22201e-06	823	0.37	0.0021
chr19_46472346_46473425	-0.282896	9.69697e-07	0	0	0	FALSE	PNMA8A	1.99993	0.000431448	783	0.53	6.1e-06
chr19_46493957_46495273	-0.221716	3.30909e-06	0	0	0	TRUE	PNMA8B	-1.33261	7.11107e-07	-1225	0.39	0.0012
chr19_46497246_46498554	-0.276497	2.49091e-06	0	0	0	FALSE	PNMA8B	-1.33261	7.11107e-07	748	0.44	0.00023
chr19_48109870_48110451	-0.252536	0	3	4	7	FALSE	PLA2G4C	1.26607	5.15802e-08	-366	-0.57	1e-06
chr19_48720348_48720501	-0.160955	1.45455e-06	1	0	1	TRUE	MAMSTR	1.84382	7.94725e-17	627	-0.47	7.8e-05
chr19_48755594_48755715	-0.183991	2.54545e-06	0	0	0	FALSE	FGF21	1.51283	0.00334504	35	-0.44	0.00046
chr19_49387646_49387793	-0.230701	3.0303e-08	0	0	0	FALSE	AC010643.1	2.36003	1.74107e-07	-288	-0.69	0
chr19_49388884_49390067	-0.19371	4.54545e-07	0	0	0	FALSE	AC010643.1	2.36003	1.74107e-07	803	-0.53	6.8e-06
chr19_49663408_49664238	-0.197144	6.06061e-08	2	4	6	FALSE	BCL2L12	0.755211	4.03538e-13	-904	-0.6	3.2e-07
chr19_51027123_51027321	-0.168187	4.5697e-06	0	0	0	FALSE	KLK11	-4.824	9.63335e-23	-718	0.59	1.5e-07
chr19_53504542_53505577	-0.221247	2.42424e-08	1	2	3	FALSE	AC011487.1	1.43655	0.00303983	1150	-0.42	0.00046
chr19_55487289_55487673	-0.17469	9.69697e-08	0	0	0	FALSE	SSC5D	-0.933552	0.0261704	-731	0.41	0.00077
chr19_58542815_58543517	-0.199853	3.93939e-07	2	2	4	FALSE	TRIM28	0.98295	1.14866e-09	-574	-0.45	0.00034
chr19_58574060_58574984	-0.212968	2.42424e-08	2	3	5	FALSE	CENPBD1P1	0.519962	0.000474448	557	-0.38	0.0034
chr2_3658633_3659141	-0.174857	3.15152e-07	0	0	0	FALSE	ALLC	-4.22561	4.6312e-36	438	0.56	7.9e-07
chr2_9556967_9557269	-0.22255	4e-07	2	3	5	FALSE	ADAM17	0.654947	3.29763e-06	235	-0.52	2e-05
chr2_10080714_10081120	0.268852	1.0303e-07	0	1	1	TRUE	CYS1	-1.78274	9.61702e-05	0	-0.39	0.0012
chr2_10081762_10082245	-0.170375	9.93939e-07	0	0	0	FALSE	CYS1	-1.78274	9.61702e-05	818	0.61	7.1e-08
chr2_10838525_10838891	-0.250481	1.67273e-06	0	0	0	FALSE	PDIA6	0.950417	7.77242e-08	548	-0.41	0.0007
chr2_23200808_23201341	-0.155895	6.66667e-08	0	1	1	FALSE	AC018467.1	-2.32176	3.16637e-12	1752	0.36	0.0031
chr2_26036082_26036448	-0.230175	1.75152e-06	2	3	5	FALSE	RAB10	0.530638	1.97479e-07	1975	-0.52	9.4e-06
chr2_26171622_26172795	0.201834	2.42424e-08	0	1	1	TRUE	GAREM2	2.21293	1.45176e-12	-296	0.39	0.0012
chr2_27357708_27357892	-0.251819	6.06061e-09	2	3	5	FALSE	GTF3C2	0.57353	1.17447e-07	674	-0.51	3.8e-05
chr2_42046855_42047000	-0.162989	1.43636e-06	2	2	4	FALSE	PKDCC	1.15961	2.53585e-05	-1020	-0.48	5.7e-05
chr2_56187209_56188139	-0.23688	2.92121e-06	0	0	0	FALSE	AC007743.1	1.13894	0.000445894	1439	-0.43	0.00032
chr2_57907018_57907239	-0.249598	1.75758e-07	0	0	0	FALSE	VRK2	0.680432	1.00065e-05	-390	-0.43	0.00042
chr2_61145329_61145718	-0.186337	1.4e-06	3	5	8	FALSE	C2orf74	-0.534672	0.00139845	261	-0.37	0.0042
chr2_68321441_68322066	-0.285705	1.27273e-07	0	0	0	FALSE	CNRIP1	-0.747947	5.11792e-05	1390	0.36	0.0034
chr2_70820504_70821228	-0.270478	3.79394e-06	0	0	0	FALSE	CLEC4F	-1.8363	1.77144e-05	0	0.53	4.2e-06
chr2_73213015_73213953	-0.178515	6.66667e-08	3	3	6	FALSE	SMYD5	0.582603	2.50516e-08	-269	-0.55	3.1e-06
chr2_74148228_74148563	0.212704	7.63636e-07	1	4	5	TRUE	BOLA3	0.549899	0.00633816	234	0.45	0.0004
chr2_74483672_74484151	-0.195949	3.99394e-06	2	2	4	FALSE	CCDC142	0.725672	3.95105e-06	264	-0.39	0.0024
chr2_87748389_87748740	-0.222053	1.52727e-06	2	3	5	FALSE	PLGLB2	-1.81368	2.929e-09	302	0.34	0.006
chr2_89213337_89213637	-0.206025	1.21212e-08	0	0	0	FALSE	IGKV1-27	-1.46585	0.0117403	-291	0.54	2.3e-06
chr2_89246509_89246715	-0.258506	1.09697e-06	0	0	0	FALSE	IGKV2-30	-1.55064	0.0080837	913	0.43	0.00036
chr2_89267824_89268300	-0.277371	0	0	0	0	FALSE	IGKV1-33	-2.05272	0.000836543	-206	0.46	0.00012
chr2_91659162_91659447	-0.264245	1.53333e-06	3	2	5	FALSE	LSP1P4	0.796319	0.01052	-525	-0.54	3.5e-06
chr2_98728434_98729521	-0.188982	1.51515e-07	2	2	4	FALSE	MGAT4A	0.966055	1.30757e-08	-1605	-0.65	5.6e-09
chr2_98729728_98730112	-0.180058	0	2	2	4	FALSE	MGAT4A	0.966055	1.30757e-08	-1014	-0.69	0
chr2_102417293_102417507	-0.262175	2.77576e-06	0	0	0	FALSE	IL18RAP	-1.62803	1.88453e-11	-1182	0.33	0.0077
chr2_106888067_106889045	-0.283331	5.0303e-07	0	1	1	FALSE	ST6GAL2	-3.38667	1.52873e-18	959	0.67	1.8e-10
chr2_108288644_108289108	-0.243751	0	1	0	1	FALSE	SULT1C2	4.89453	1.1705e-38	5	-0.53	6.9e-06
chr2_112253982_112254217	-0.219707	0	1	2	3	FALSE	ZC3H8	0.617337	0.000574067	-919	-0.55	2.2e-06
chr2_112255322_112255528	-0.183991	1.39394e-07	3	5	8	FALSE	ZC3H8	0.617337	0.000574067	186	-0.48	5.2e-05
chr2_119225683_119226007	0.179953	1.27273e-07	0	2	2	FALSE	STEAP3	-1.29098	7.40265e-06	1852	-0.46	0.0001
chr2_128090235_128090385	-0.194616	1.57576e-07	0	0	0	FALSE	UGGT1	0.967512	1.05923e-09	-815	-0.52	1.2e-05
chr2_143088421_143089919	-0.296806	1.27273e-07	0	0	0	FALSE	ARHGAP15	-1.15569	2.26083e-06	-1443	0.53	7.3e-06
chr2_143093104_143093490	-0.222529	7.21212e-07	0	0	0	FALSE	ARHGAP15	-1.15569	2.26083e-06	1742	0.45	0.00016
chr2_150540028_150540252	-0.167805	3.33333e-07	0	0	0	FALSE	RND3	-2.04552	6.16072e-16	1017	0.53	6.2e-06
chr2_161307568_161307987	-0.189968	3.15152e-07	2	2	4	FALSE	PSMD14	0.671168	1.23259e-05	-51	-0.58	1e-06
chr2_165795829_165796097	-0.22814	0	0	0	0	FALSE	GALNT3	-1.31243	1.07144e-05	1147	0.43	0.00031
chr2_170716262_170717329	0.32034	1.15152e-07	1	1	2	TRUE	SP5	2.20312	1.39721e-11	911	0.46	0.00026
chr2_170716262_170717329.1	0.32034	1.15152e-07	1	1	2	TRUE	LINC01124	1.46248	1.35949e-05	1695	0.53	1.2e-05
chr2_176129437_176129577	0.168845	4.99394e-06	0	1	1	TRUE	HOXD8	2.88268	1.01328e-16	-117	0.48	4.7e-05
chr2_182522633_182522789	-0.186231	1.09091e-07	0	0	0	FALSE	PDE1A	-0.811265	0.0189566	-403	0.39	0.0012
chr2_185739455_185739875	-0.241741	2.42424e-08	0	1	1	FALSE	FSIP2	1.86226	1.66746e-06	560	-0.53	6.6e-06
chr2_196799984_196800056	-0.197634	1.49697e-06	2	4	6	FALSE	GTF3C3	0.70929	3.73526e-17	259	-0.38	0.0016
chr2_202264667_202265192	-0.162738	2.42424e-07	3	3	6	FALSE	NOP58	0.752151	1.632e-08	-524	-0.42	0.00051
chr2_203015609_203015708	-0.162186	3.26061e-06	2	3	5	FALSE	WDR12	0.562608	9.00679e-08	811	-0.45	0.0004
chr2_218066454_218067244	-0.220269	5.69697e-07	0	0	0	FALSE	CXCR2P1	-1.93936	3.18468e-07	725	0.44	0.00022
chr2_218067656_218068022	-0.271329	6.06061e-08	0	0	0	FALSE	CXCR2P1	-1.93936	3.18468e-07	1927	0.5	2.2e-05
chr2_218123686_218124366	-0.233845	1.17576e-06	0	0	0	FALSE	CXCR2	-2.85111	6.553e-15	-923	0.33	0.0072
chr2_218164959_218165079	-0.25642	1.95152e-06	1	0	1	FALSE	CXCR1	-2.99031	2.08318e-17	-1916	0.35	0.0039
chr2_218167301_218167955	-0.251636	9.09091e-08	0	0	0	FALSE	CXCR1	-2.99031	2.08318e-17	306	0.53	5.9e-06
chr2_218290525_218290745	-0.155316	1.0303e-07	2	4	6	FALSE	TMBIM1	0.502379	5.5337e-05	-1841	-0.6	2e-07
chr2_218292788_218293091	-0.172397	1.81818e-08	2	3	5	FALSE	TMBIM1	0.502379	5.5337e-05	202	-0.6	2.2e-07
chr2_218293324_218294045	-0.195422	6.66667e-08	2	1	3	FALSE	TMBIM1	0.502379	5.5337e-05	738	-0.57	1.2e-06
chr2_231057994_231058685	-0.212819	1.51515e-07	2	3	5	FALSE	PSMD1	0.57231	1.48651e-06	1130	-0.45	0.00018
chr2_231196544_231197189	-0.246078	2e-07	0	1	1	FALSE	ARMC9	1.31065	1.36026e-09	-1357	-0.39	0.0012
chr2_233853176_233853635	-0.231674	0	1	0	1	FALSE	HJURP	3.88094	7.128e-53	-931	-0.67	0
chr2_236566110_236566371	-0.235667	5.15152e-07	0	0	0	FALSE	ACKR3	1.25089	0.000101933	-1416	-0.32	0.0094
chr2_236568803_236569307	-0.190962	0	1	5	6	TRUE	ACKR3	1.25089	0.000101933	1016	-0.62	6.3e-08
chr2_241685781_241686106	-0.161561	8.48485e-08	2	3	5	FALSE	DTYMK	1.21693	2.69163e-20	-885	-0.55	5.6e-06
chr20_1201725_1202451	-0.248965	1.27273e-07	0	0	0	FALSE	C20orf202	0.745878	0.00413866	-1003	-0.34	0.0054
chr20_2469268_2469655	-0.152258	1.28485e-06	2	3	5	FALSE	SNRPB	1.08496	3.16448e-14	-1198	-0.61	1.4e-07
chr20_3042532_3043006	0.18652	1.41212e-06	0	2	2	FALSE	GNRH2	-2.99226	6.54945e-15	-616	-0.71	1.7e-11
chr20_5125961_5126127	-0.239733	3.15152e-07	2	2	4	FALSE	PCNA	1.18136	3.60814e-13	-499	-0.43	0.00078
chr20_13786360_13786825.1	-0.250268	6.66667e-08	2	3	5	FALSE	ESF1	0.650729	1.54965e-12	1474	-0.51	2.8e-05
chr20_20016128_20016732	-0.15359	6.06061e-09	0	1	1	FALSE	NAA20	0.544313	0.000797603	-384	-0.65	1e-08
chr20_21570019_21570841	0.198915	0	0	0	0	FALSE	LINC01727	-3.50514	3.2083e-14	43	-0.77	3.2e-14
chr20_25622270_25623055	-0.215182	6.06061e-09	3	5	8	FALSE	ZNF337-AS1	1.24118	3.0439e-13	-990	-0.68	0
chr20_25624701_25625026.1	-0.240521	4.12121e-07	3	4	7	TRUE	ZNF337-AS1	1.24118	3.0439e-13	656	-0.63	8e-08
chr20_29080597_29080941	-0.203476	4.89697e-06	0	0	0	FALSE	FRG1DP	2.89901	2.67344e-12	207	-0.51	1.4e-05
chr20_30377525_30378015	-0.163842	4.35152e-06	3	4	7	TRUE	FRG1BP	0.726913	1.8655e-05	153	-0.51	1.7e-05
chr20_31513467_31513982	-0.170383	0	2	5	7	FALSE	HM13	0.972662	1.16635e-09	-428	-0.65	6.2e-09
chr20_31738334_31738623	-0.199604	2.42424e-08	2	3	5	FALSE	TPX2	2.36734	2.34599e-27	-648	-0.51	2e-05
chr20_31952595_31952868	-0.170704	1.27273e-07	0	0	0	FALSE	PDRG1	0.859202	2.84189e-14	503	-0.5	2.6e-05
chr20_33673691_33673751	-0.334612	2.58788e-06	2	2	4	FALSE	NECAB3	1.52702	7.45723e-15	-712	-0.65	4.1e-09
chr20_33992107_33992601	-0.207603	3.0303e-08	2	3	5	FALSE	RALY	0.658435	5.87477e-11	-1045	-0.49	6.8e-05
chr20_33992107_33992601.1	-0.207603	3.0303e-08	2	3	5	FALSE	RALY-AS1	0.633622	5.09591e-05	-1756	-0.7	0
chr20_35454175_35454431	-0.171811	4.24242e-08	2	3	5	FALSE	CEP250	0.664783	1.29435e-06	-733	-0.52	9.6e-06
chr20_35455981_35456146	-0.194562	2.54545e-06	1	2	3	FALSE	CEP250	0.664783	1.29435e-06	817	-0.4	0.001
chr20_36607129_36607521	-0.234025	4.84848e-07	2	3	5	FALSE	RAB5IF	0.50266	0.00466738	1395	-0.62	7.6e-08
chr20_38032491_38032698	-0.204708	3.08485e-06	2	4	6	FALSE	TTI1	0.517645	1.14032e-08	-770	-0.48	0.0001
chr20_38445542_38446265	-0.178822	2.42424e-08	1	1	2	FALSE	SNHG11	0.583695	0.0102916	-313	-0.43	0.00031
chr20_38447602_38448018	-0.244944	1.05455e-06	2	3	5	FALSE	SNHG11	0.583695	0.0102916	1024	-0.44	0.00058
chr20_43589851_43590284.1	-0.223068	0	3	5	8	FALSE	IFT52	0.878742	1.13828e-14	-647	-0.64	2.8e-08
chr20_45880469_45880869	-0.218262	3.0303e-08	1	2	3	FALSE	ZSWIM1	0.523495	0.000371856	-358	-0.52	8.4e-06
chr20_46090346_46090764	-0.246648	0	3	4	7	FALSE	NCOA5	0.62396	2.72298e-09	394	-0.6	2.2e-07
chr20_46514455_46514872	-0.263938	0	0	0	0	FALSE	ZNF334	-0.911939	0.0130154	896	0.38	0.0018
chr20_48919853_48920035	-0.183066	2.90909e-06	1	2	3	FALSE	ARFGEF2	0.717878	4.31849e-11	-1855	-0.56	1.8e-06
chr20_48920977_48921058	-0.195614	8.90909e-07	1	2	3	FALSE	ARFGEF2	0.717878	4.31849e-11	-832	-0.6	1.6e-07
chr20_48922601_48922895	-0.200379	9.09091e-08	3	5	8	FALSE	ARFGEF2	0.717878	4.31849e-11	711	-0.62	8.2e-08
chr20_50691084_50691746	0.260802	3.81818e-07	0	2	2	TRUE	RIPOR3	-3.7819	1.14498e-40	0	-0.46	0.0001
chr20_59124529_59126233	-0.314734	1.27273e-07	0	1	1	FALSE	ZNF831	-1.03506	0.00231204	1148	0.54	4.2e-06
chr20_62775364_62775745	-0.195163	1.82424e-06	0	0	0	FALSE	LINC00659	-1.3779	0.00435837	0	0.38	0.0017
chr20_63103543_63104249	-0.182613	9.39394e-07	0	0	0	FALSE	HAR1A	-1.67492	1.41614e-07	1338	0.48	4e-05
chr20_63378739_63379260	-0.217921	7.39394e-07	0	0	0	FALSE	CHRNA4	-2.14071	0.000183597	338	0.34	0.0052
chr20_63655221_63656993	-0.224814	9.09091e-08	0	0	0	FALSE	RTEL1	0.510302	0.0137472	-817	-0.47	0.00016
chr20_63980657_63980780	-0.24706	1.27273e-07	2	3	5	FALSE	PRPF6	0.544554	8.67803e-07	-355	-0.45	0.00034
chr20_63980657_63980780.1	-0.24706	1.27273e-07	2	3	5	FALSE	SAMD10	0.618692	3.43929e-06	649	-0.42	0.0011
chr21_9324572_9324636	-0.170495	1.35152e-06	2	0	2	FALSE	CR381653.1	1.62934	4.60541e-06	-377	-0.7	0
chr21_10120022_10120148	-0.193972	5.79394e-06	0	0	0	TRUE	CR382285.1	3.88137	2.54939e-10	713	-0.43	0.00039
chr21_10121303_10121792	-0.27616	5.15152e-07	0	0	0	TRUE	CR382285.1	3.88137	2.54939e-10	1994	-0.43	0.00035
chr21_15626733_15626947	-0.25046	1.43636e-06	0	0	0	FALSE	AJ009632.2	1.10394	0.0129191	-395	-0.52	9.6e-06
chr21_24427451_24427685	-0.325232	3.27273e-07	0	0	0	FALSE	LINC01684	-1.03285	0.00135336	-1055	0.35	0.0047
chr21_25640916_25641007	-0.264063	1.59394e-06	0	1	1	FALSE	JAM2	-0.546686	0.0423035	1644	0.41	0.0008
chr21_31560581_31561051	-0.230485	0	0	0	0	FALSE	TIAM1	-1.15604	8.74908e-07	604	0.38	0.002
chr21_31561266_31561521	-0.267343	0	0	0	0	FALSE	TIAM1	-1.15604	8.74908e-07	1289	0.43	0.0004
chr21_34668430_34668620	-0.295338	1.05455e-06	0	1	1	FALSE	CLIC6	-2.68914	9.60115e-08	-769	0.56	1.8e-06
chr21_34746062_34746469	-0.195558	6.36364e-07	1	1	2	FALSE	LINC01426	2.18038	2.71496e-09	305	-0.48	3.8e-05
chr21_38663103_38663836	-0.271779	1.66667e-06	0	1	1	FALSE	ERG	-1.08332	2.2469e-07	1323	0.36	0.0033
chr21_38747635_38747964	-0.169052	1.53939e-06	0	0	0	FALSE	LINC00114	4.28459	2.36228e-10	175	-0.53	3.8e-06
chr21_43660698_43660855	-0.180276	9.15152e-07	1	2	3	FALSE	RRP1B	0.636649	3.77339e-05	1150	-0.52	1.8e-05
chr21_43788795_43788959	-0.164632	6.06061e-09	2	3	5	FALSE	RRP1	0.624137	6.16552e-06	-554	-0.44	0.00027
chr21_46185421_46185956	-0.211255	2.42424e-08	1	2	3	FALSE	SPATC1L	2.58482	2.16842e-22	945	-0.61	1.3e-07
chr22_12602681_12602840	-0.212304	4.9697e-06	0	0	0	FALSE	FRG1GP	4.30134	4.65474e-23	215	-0.53	4.3e-06
chr22_16599722_16600524	-0.175342	4.84848e-08	0	0	0	FALSE	AP000547.3	-2.84082	4.87164e-19	-1387	0.48	0.00014
chr22_17777139_17777364	-0.169775	1.27273e-07	3	4	7	TRUE	LINC00528	0.672457	0.0219859	0	-0.61	1.2e-07
chr22_19145092_19145224	-0.152574	3.21818e-06	1	0	1	FALSE	ESS2	0.56972	1.42575e-06	408	-0.44	0.00025
chr22_19172707_19173072	-0.205816	1.26667e-06	3	3	6	FALSE	LINC01311	0.715503	0.021628	1312	-0.41	0.0007
chr22_20956794_20956926	-0.17646	7.21212e-07	2	1	3	FALSE	LINC01637	0.93581	0.000955019	-166	-0.49	4.5e-05
chr22_22856789_22857157	-0.225305	3.44848e-06	0	0	0	FALSE	IGLV2-5	-1.83383	0.00158344	27	0.38	0.0016
chr22_26511120_26511796	-0.191843	2.42424e-08	2	3	5	FALSE	TFIP11	0.531086	0.000609661	-709	-0.47	0.00019
chr22_36530323_36530415	-0.198062	1.29697e-06	2	3	5	FALSE	EIF3D	0.622554	8.71851e-08	887	-0.39	0.0014
chr22_36818003_36818820	-0.268132	2.42424e-07	0	0	0	FALSE	PVALB	-5.36834	2.12207e-81	-659	0.69	1.7e-10
chr22_36819729_36820501	-0.255726	2.51515e-06	0	0	0	FALSE	PVALB	-5.36834	2.12207e-81	250	0.47	6.2e-05
chr22_38951600_38952047	-0.196849	2.07273e-06	0	0	0	FALSE	APOBEC3A	-1.7127	3.33127e-05	-694	0.35	0.0043
chr22_40855220_40855495.1	-0.228191	1.43636e-06	2	3	5	FALSE	XPNPEP3	-0.590518	4.47467e-06	-1582	-0.36	0.0054
chr22_45285335_45286197	-0.226757	3.27273e-07	1	1	2	FALSE	UPK3A	5.85846	7.58006e-28	353	-0.39	0.0013
chr22_45414472_45414628	-0.171043	1.35152e-06	0	1	1	FALSE	RIBC2	3.8339	4.36847e-20	781	-0.46	0.00012
chr22_46148586_46148740	-0.160537	1.05455e-06	1	2	3	FALSE	PPARA	-0.530099	0.00910982	-1781	-0.33	0.0072
chr22_49852520_49852780	-0.150059	1.13333e-06	1	3	4	FALSE	ZBED4	0.538605	4.82405e-05	-1062	-0.51	1.9e-05
chr3_3798595_3799078	0.276039	5.0303e-07	0	1	1	TRUE	LRRN1	-1.66682	0.000431612	-359	-0.39	0.0011
chr3_9750612_9751152	-0.174129	6.06061e-08	3	5	8	FALSE	OGG1	0.899649	3.40493e-08	668	-0.59	4.2e-07
chr3_11225279_11226238	-0.278016	6.06061e-08	1	0	1	FALSE	AC083855.2	1.65588	7.02378e-07	0	-0.45	0.00018
chr3_12795518_12795816	-0.155776	1.47879e-06	0	0	0	FALSE	CAND2	-1.15695	0.000589573	-656	0.43	0.00032
chr3_28349764_28350056	-0.223386	1.12727e-06	3	5	8	FALSE	AZI2	0.508505	0.00126268	637	-0.47	0.00015
chr3_42488138_42488694	-0.231089	8.48485e-08	0	0	0	FALSE	VIPR1	-4.38121	1.48147e-53	-605	0.49	4.1e-05
chr3_42488914_42489226	-0.178088	5.63636e-07	0	0	0	FALSE	VIPR1	-4.38121	1.48147e-53	-73	0.39	0.0011
chr3_42530587_42531505	-0.237702	0	0	0	0	FALSE	VIPR1-AS1	-3.46844	7.29316e-18	-1753	0.4	0.00076
chr3_44623939_44624180	-0.163282	2e-07	1	1	2	FALSE	ZNF197-AS1	0.987415	0.0108604	-617	-0.34	0.0051
chr3_46027717_46028040	-0.222289	6.05455e-06	0	0	0	FALSE	XCR1	-1.02112	0.0274554	0	0.45	0.00015
chr3_48187077_48187459	-0.201796	0	2	1	3	FALSE	CDC25A	2.2256	7.23391e-21	-943	-0.69	0
chr3_48846361_48846691	-0.221923	3.0303e-08	2	3	5	FALSE	PRKAR2A-AS1	1.66386	1.85476e-14	-881	-0.6	3.4e-07
chr3_48917710_48918041.1	-0.181468	6.06061e-09	2	3	5	FALSE	ARIH2OS	0.617432	0.000379886	-1344	-0.44	0.0005
chr3_69542034_69542280	0.15442	3.07273e-06	0	1	1	TRUE	FRMD4B	-1.17381	2.89916e-16	-303	-0.36	0.0028
chr3_75668845_75669484	-0.206815	2.06061e-07	0	0	0	TRUE	RPL23AP49	-1.21099	0.00277308	-672	0.47	6.7e-05
chr3_97972699_97972910	-0.176856	1.60606e-06	2	3	5	FALSE	RIOX2	0.881433	6.78553e-07	242	-0.59	2.9e-07
chr3_112133908_112134708	-0.278275	0	0	0	0	FALSE	GCSAM	-1.01174	0.000393894	603	0.44	0.00024
chr3_112976458_112976740	-0.186928	1.15758e-06	0	0	0	FALSE	CD200R1	-1.08139	5.45538e-05	1336	0.36	0.0033
chr3_123586570_123586801	-0.154665	1.27273e-07	3	4	7	FALSE	MYLK-AS1	0.582887	0.0341196	1028	-0.53	1.6e-05
chr3_126293791_126294173	-0.206961	8.30303e-07	1	1	2	FALSE	AC063919.1	1.08592	0.00402293	0	-0.43	0.00029
chr3_127628840_127628967	0.16219	1.59394e-06	0	1	1	TRUE	PODXL2	2.04395	1.41599e-05	-214	-0.34	0.0061
chr3_134598019_134598621	-0.268925	0	0	0	0	FALSE	EPHB1	-2.93449	1.43531e-23	218	0.6	1.9e-07
chr3_141050002_141050511	-0.228996	6.36364e-07	0	0	0	FALSE	SPSB4	-3.72785	9.78693e-22	-891	0.53	3.7e-06
chr3_143118722_143118924	0.166745	1.18182e-06	0	1	1	TRUE	CHST2	0.914508	0.00140186	-407	0.32	0.0093
chr3_147395305_147395676	0.222382	4.12121e-07	1	0	1	FALSE	ZIC1	1.69893	0.00354992	1883	0.32	0.0089
chr3_148280200_148281107	-0.263798	7.21212e-07	0	0	0	TRUE	LINC02046	4.58325	5.54828e-07	0	-0.41	0.00066
chr3_148281390_148281574	-0.309605	1.09091e-07	0	0	0	FALSE	LINC02046	4.58325	5.54828e-07	499	-0.32	0.0079
chr3_149130327_149130711	-0.226228	1.40606e-06	2	4	6	FALSE	HPS3	1.11625	3.26921e-13	743	-0.54	4.3e-06
chr3_151328489_151328952	-0.180021	5.15152e-07	2	1	3	FALSE	P2RY13	-1.91642	8.47014e-10	-596	0.33	0.0062
chr3_155023749_155024314	-0.291173	1.21212e-08	0	0	0	FALSE	MME	-1.46375	0.00672948	0	0.52	1.3e-05
chr3_156036867_156037315	-0.280736	9.09091e-07	0	0	0	FALSE	KCNAB1	-1.4031	1.67783e-15	-386	0.52	1.2e-05
chr3_156553457_156554054	-0.205069	7.63636e-07	3	4	7	FALSE	SSR3	0.614614	3.8179e-06	-1130	-0.6	1.5e-07
chr3_156815377_156815576	-0.163353	3.15152e-07	1	3	4	FALSE	LINC00886	0.774459	0.00922149	-1486	-0.47	9e-05
chr3_179562045_179562472	-0.241997	0	2	2	4	FALSE	ACTL6A	0.865317	1.65843e-27	-408	-0.66	1.3e-09
chr3_183255123_183255537	-0.28506	0	1	2	3	FALSE	B3GNT5	2.93998	2.40321e-19	1879	-0.62	5.2e-08
chr3_183427640_183427996	0.230502	8.48485e-08	0	1	1	TRUE	MCF2L2	2.78237	2.33746e-10	-782	0.46	0.00013
chr3_184247990_184248149	-0.208572	3.57576e-07	1	1	2	FALSE	ALG3	0.893234	3.08665e-09	-1399	-0.55	5e-06
chr3_184297871_184298014	-0.166956	9.09091e-08	0	0	0	FALSE	PSMD2	0.824746	7.09628e-13	-695	-0.58	5.7e-07
chr3_184298423_184298611	-0.164157	5.09091e-07	1	2	3	FALSE	PSMD2	0.824746	7.09628e-13	-98	-0.44	0.00028
chr3_186566283_186566527	-0.211522	1.24242e-06	2	3	5	FALSE	DNAJB11	1.12389	1.25808e-13	-876	-0.56	2e-06
chr3_194003804_194004079	-0.196832	4.90909e-07	3	3	6	FALSE	LINC02026	1.15852	0.000155293	145	-0.37	0.0025
chr3_196970316_196971348	-0.167014	7.27273e-08	0	1	1	FALSE	PIGZ	0.585427	0.00134873	1256	-0.45	0.00016
chr4_985474_985642.1	-0.171695	2.42424e-08	2	1	3	FALSE	IDUA	0.767615	0.000254361	-1355	-0.38	0.0032
chr4_985896_986316.1	-0.235015	0	2	2	4	FALSE	IDUA	0.767615	0.000254361	-681	-0.45	0.0003
chr4_1112734_1112960	-0.206612	1.21212e-06	0	0	0	TRUE	RNF212	-1.86349	2.68267e-12	-602	0.44	0.00029
chr4_1710907_1711321	-0.166207	5.15152e-06	2	4	6	TRUE	SLBP	0.650388	8.73602e-10	-1234	-0.6	4.4e-07
chr4_1713536_1714572.1	-0.221007	6.06061e-09	2	3	5	FALSE	SLBP	0.650388	8.73602e-10	981	-0.73	0
chr4_1872637_1873084	-0.184441	4.12121e-07	2	2	4	FALSE	NSD2	1.12961	4.51808e-17	1213	-0.63	4.2e-08
chr4_3291415_3291503	-0.192473	6.66667e-08	1	1	2	FALSE	RGS12	0.531456	0.00172689	-1525	-0.35	0.0047
chr4_3293813_3294009	-0.21459	6.06061e-08	1	2	3	FALSE	RGS12	0.531456	0.00172689	785	-0.42	0.00045
chr4_4542928_4543071	0.193703	1.26667e-06	1	2	3	FALSE	STX18-AS1	0.62378	0.000307909	797	0.37	0.0048
chr4_4858233_4858712	0.174646	2.66667e-07	0	0	0	TRUE	MSX1	1.76667	2.00274e-12	-954	0.54	5.3e-06
chr4_6268931_6269124	-0.176327	5.09091e-07	0	0	0	FALSE	WFS1	1.24644	3.3498e-10	-725	-0.39	0.0015
chr4_17808631_17808985	-0.209733	5.75758e-07	3	4	7	FALSE	DCAF16	0.754219	5.41312e-07	-1773	-0.49	7.6e-05
chr4_17808631_17808985.1	-0.209733	5.75758e-07	3	4	7	FALSE	NCAPG	4.1181	5.2062e-55	-1917	-0.66	2.8e-09
chr4_31996088_31996605	-0.33469	4.12121e-07	0	1	1	TRUE	LINC02506	3.05623	0.00138279	-792	-0.47	6e-05
chr4_39528604_39528851	-0.173209	2.41212e-06	2	3	5	FALSE	UGDH	0.708958	0.00684266	293	-0.36	0.006
chr4_78549849_78550838	-0.309399	3.93939e-07	0	0	0	FALSE	ANXA3	-1.52527	2.25354e-05	-681	0.47	7.1e-05
chr4_87321154_87321348	0.166559	7.21212e-07	0	4	4	FALSE	HSD17B13	-2.8666	1.97479e-07	-1558	-0.82	0
chr4_87322056_87322445	0.216107	2.47879e-06	0	3	3	FALSE	HSD17B13	-2.8666	1.97479e-07	-461	-0.79	0
chr4_89879247_89879614	-0.260725	1.64242e-06	0	0	0	FALSE	MMRN1	-1.32479	0.000891243	0	0.41	0.00075
chr4_103198804_103199279	-0.177339	0	2	3	5	FALSE	CENPE	3.28073	2.20373e-33	395	-0.6	2.5e-07
chr4_105707616_105707814	-0.168971	5.45455e-08	2	3	5	FALSE	GSTCD	0.882304	1.067e-09	-964	-0.51	1.4e-05
chr4_120067699_120067860	-0.151176	2.65455e-06	2	3	5	FALSE	MAD2L1	1.97853	2.08524e-19	625	-0.58	1.5e-06
chr4_127880055_127880281	-0.190041	1.69697e-07	2	3	5	FALSE	PLK4	2.00393	6.85481e-21	-580	-0.52	1.1e-05
chr4_140428073_140428346	-0.161514	1.21212e-08	2	1	3	FALSE	CLGN	2.88262	7.10825e-12	105	-0.54	3.8e-06
chr4_141213160_141213977	-0.258439	9.69697e-08	0	0	0	TRUE	RNF150	-0.962244	0.0169312	283	0.42	0.00056
chr4_141214324_141214955	-0.245844	0	0	0	0	FALSE	RNF150	-0.962244	0.0169312	1447	0.47	8.8e-05
chr4_141429683_141430364	-0.237481	1.38788e-06	0	0	0	FALSE	AC097504.2	-1.12584	0.0319426	-467	0.35	0.0044
chr4_144659615_144660048	-0.277462	1.33333e-07	0	0	0	FALSE	HHIP-AS1	-2.96249	5.57983e-14	-1309	0.56	9.8e-07
chr4_147731503_147731632	0.157947	9.57576e-07	0	4	4	TRUE	ARHGAP10	-1.63558	9.64503e-16	-431	-0.35	0.0039
chr4_173332795_173333554	-0.165392	1.63636e-07	2	3	5	TRUE	HMGB2	1.25342	2.10389e-12	-1571	-0.66	2.6e-09
chr4_182882026_182882287	0.283379	1.27273e-07	0	0	0	FALSE	AC079766.1	-1.92167	9.17783e-11	0	-0.42	0.00041
chr4_184734814_184734964	-0.158707	4.24242e-08	2	2	4	FALSE	CENPU	2.47123	3.77256e-30	681	-0.63	2.5e-08
chr4_186502450_186502931	-0.263865	2.42424e-08	0	0	0	FALSE	F11-AS1	-1.41339	1.3647e-05	1453	0.37	0.0023
chr5_613786_614143	-0.241933	0	1	3	4	FALSE	CEP72	1.19686	5.30014e-13	1514	-0.55	2.8e-06
chr5_852199_852677	-0.215761	0	0	0	0	FALSE	ZDHHC11	-0.897	0.00303871	1213	-0.37	0.0026
chr5_10440423_10440934	-0.240207	0	1	1	2	FALSE	ROPN1L	-1.54939	1.07212e-07	-590	0.36	0.0035
chr5_16618263_16619190	-0.239173	0	0	0	0	FALSE	RETREG1	-2.17573	6.16089e-08	1205	0.59	2.9e-07
chr5_36153580_36153834	-0.177544	3.15152e-06	2	3	5	FALSE	SKP2	0.634292	0.000490392	1591	-0.35	0.0076
chr5_36607996_36608158	-0.210543	7.39394e-07	1	0	1	FALSE	SLC1A3	1.75429	9.08033e-12	1641	-0.38	0.0016
chr5_37248220_37248425	-0.151497	1.46061e-06	1	0	1	FALSE	CPLANE1	0.600044	6.90087e-07	-1003	-0.58	5.8e-07
chr5_37371584_37371829	0.219958	5.51515e-07	3	5	8	FALSE	NUP155	1.14022	3.1862e-26	403	0.45	0.00016
chr5_38609330_38609812	-0.188653	6.06061e-08	0	0	0	FALSE	LIFR	-2.76227	2.5386e-24	976	0.58	7.1e-07
chr5_43039208_43039737	-0.181102	4.24242e-08	3	5	8	TRUE	AC025171.2	0.710447	4.10175e-05	-1838	-0.55	2.7e-06
chr5_55021612_55022458	-0.248934	2.20606e-06	0	1	1	FALSE	ESM1	5.19921	1.75064e-78	-213	-0.41	0.0015
chr5_55021612_55022458.1	-0.248934	2.20606e-06	0	1	1	FALSE	GZMK	-1.59313	1.40994e-05	-1795	0.51	3.8e-05
chr5_55023960_55024168	-0.232539	4.86667e-06	0	1	1	FALSE	ESM1	5.19921	1.75064e-78	1289	-0.38	0.0036
chr5_56233274_56233745	-0.230923	1.35152e-06	0	0	0	FALSE	ANKRD55	-3.46411	9.91927e-40	0	0.65	4.2e-09
chr5_60700780_60701187	-0.214045	8.48485e-08	3	2	5	FALSE	DEPDC1B	3.19764	2.40173e-27	590	-0.48	6.3e-05
chr5_68533600_68533937	-0.204735	4.84848e-08	1	1	2	FALSE	AC010280.1	-3.64691	1.68232e-19	70	0.43	0.00032
chr5_68534188_68534700	-0.194232	6.06061e-08	1	3	4	FALSE	AC010280.1	-3.64691	1.68232e-19	658	0.36	0.0032
chr5_69190139_69190654	-0.151902	5.45455e-08	2	2	4	FALSE	CENPH	1.99369	3.04574e-36	591	-0.64	2.4e-08
chr5_69190139_69190654.1	-0.151902	5.45455e-08	2	2	4	FALSE	AC022107.1	1.33086	3.38759e-15	687	-0.57	1.7e-06
chr5_69559488_69559733	-0.217319	6.90909e-07	2	3	5	FALSE	GTF2H2C	0.800811	3.77527e-09	-475	-0.46	0.00011
chr5_69560850_69561056	-0.202759	1.27273e-07	2	2	4	FALSE	GTF2H2C	0.800811	3.77527e-09	642	-0.64	1.4e-08
chr5_91313521_91313610	-0.175404	1.48485e-06	2	0	2	FALSE	LUCAT1	3.34854	3.13545e-12	-937	-0.43	0.00038
chr5_114053628_114054437	-0.326331	1.27273e-07	0	0	0	FALSE	KCNN2	-2.89961	2.96821e-11	-1108	0.48	6.7e-05
chr5_132814055_132814448	0.295781	5.39394e-07	0	1	1	TRUE	SOWAHA	1.72621	1.44343e-08	468	0.4	0.00096
chr5_132867898_132868338	-0.155269	1.0303e-07	2	3	5	FALSE	GDF9	0.812541	0.00596559	1014	-0.45	0.0004
chr5_138140353_138140948	-0.228997	5.15152e-07	0	0	0	FALSE	NME5	-1.36331	0.000529581	910	0.43	0.0003
chr5_138330697_138330800	-0.180277	1.38182e-06	0	0	0	FALSE	FAM53C	0.510685	0.000157997	-1135	-0.37	0.0023
chr5_138332631_138332806	-0.16935	1.57576e-07	0	0	0	FALSE	FAM53C	0.510685	0.000157997	696	-0.61	9.6e-08
chr5_150356574_150357063	-0.165889	1.0303e-07	2	2	4	FALSE	TCOF1	1.22646	5.01097e-16	-566	-0.52	9.8e-06
chr5_150358356_150358709	-0.186883	1.45455e-07	2	4	6	TRUE	TCOF1	1.22646	5.01097e-16	727	-0.54	3.9e-06
chr5_150757669_150758159	-0.208073	0	3	5	8	FALSE	DCTN4	0.513272	4.15721e-08	-950	-0.64	2.1e-08
chr5_160422171_160422498	-0.171514	0	2	3	5	FALSE	PTTG1	3.21066	4.79057e-48	349	-0.75	0
chr5_168232581_168234150	-0.198971	7.0303e-07	0	0	0	FALSE	CTB-178M22.2	1.65182	2.34422e-05	224	-0.47	8.3e-05
chr5_170232614_170233842	-0.312324	2.06061e-07	0	0	0	TRUE	C5orf58	3.83368	1.86119e-12	167	-0.4	0.00078
chr5_175477661_175477875	-0.205895	2.05455e-06	1	2	3	FALSE	SFXN1	-0.771331	6.86989e-07	599	-0.35	0.0038
chr5_176449304_176449529	-0.211564	1.27273e-07	2	4	6	FALSE	FAF2	0.529093	9.80092e-09	1676	-0.58	6.6e-07
chr5_176898744_176899028	-0.221449	5.33333e-07	0	0	0	FALSE	HK3	-2.03061	2.41542e-14	-304	0.37	0.0027
chr5_177088177_177088341	-0.156601	4.13333e-06	2	3	5	FALSE	FGFR4	0.927889	1.24081e-05	1291	-0.48	5.5e-05
chr5_177302415_177302444.1	-0.203402	1.76364e-06	2	3	5	FALSE	PRELID1	0.557889	8.92508e-06	-1330	-0.59	6.8e-07
chr5_177304722_177305183	-0.192951	2.72727e-07	2	4	6	FALSE	PRELID1	0.557889	8.92508e-06	948	-0.7	0
chr5_177598552_177599418	-0.200287	1.51515e-07	1	3	4	FALSE	B4GALT7	0.632803	1.15067e-08	-682	-0.54	4.8e-06
chr5_177950646_177952359	-0.292745	1.27273e-07	0	0	0	FALSE	AC106795.2	-1.56198	5.02884e-05	311	0.59	3.7e-07
chr5_179551652_179552113	-0.219331	3.0303e-08	2	2	4	FALSE	RUFY1	0.652195	9.39521e-11	1094	-0.63	2.5e-08
chr5_180592058_180592846	-0.29107	7.33333e-07	0	0	0	TRUE	SCGB3A1	-1.95876	3.03236e-08	518	0.56	1.8e-06
chr5_180651095_180651753	-0.299273	1.27273e-07	0	0	0	FALSE	FLT4	-0.77763	0.000947836	1471	0.41	0.00065
chr5_181247882_181248198.1	-0.226531	4.54545e-07	2	4	6	FALSE	CTC-338M12.4	1.09231	5.8755e-06	1359	-0.44	0.00044
chr6_693728_694033	-0.162072	1.4303e-06	0	0	0	FALSE	EXOC2	0.54107	6.80924e-07	617	-0.41	0.00061
chr6_5457910_5458096	0.275894	2.24242e-07	0	4	4	FALSE	AL021328.1	-2.03353	0.00155941	0	-0.65	4e-09
chr6_6686673_6686913	-0.203381	2.48485e-07	2	2	4	FALSE	AL031123.3	0.905562	0.000429313	1525	-0.62	7.6e-08
chr6_7540580_7540921	0.157238	2.42424e-08	0	1	1	TRUE	DSP	0.728719	3.47304e-07	-654	0.43	0.00068
chr6_10417544_10417780	0.221966	1.24242e-06	0	0	0	TRUE	TFAP2A	2.39205	1.97868e-07	-1879	0.41	0.00072
chr6_10418679_10419484	0.22258	1.81818e-08	0	1	1	TRUE	TFAP2A	2.39205	1.97868e-07	-175	0.47	6.9e-05
chr6_13616246_13616446	-0.169638	0	3	4	7	FALSE	NOL7	0.669173	8.94788e-12	919	-0.62	5.1e-08
chr6_24776222_24776674	-0.182768	2.42424e-07	3	3	6	FALSE	GMNN	1.86941	2.15234e-24	1291	-0.5	2e-05
chr6_28090906_28091423	0.246343	0	0	0	0	TRUE	ZSCAN12P1	0.981512	1.74963e-05	0	0.52	1.3e-05
chr6_28258316_28258746	-0.169578	3.57576e-07	0	0	0	FALSE	NKAPL	-1.84851	8.2966e-10	-574	0.46	9e-05
chr6_29560093_29560389	-0.212883	0	3	2	5	FALSE	UBD	3.58957	5.08112e-11	168	-0.37	0.0024
chr6_29747691_29748069	-0.1786	7.39394e-07	1	0	1	FALSE	MICE	0.756732	0.0187514	-900	-0.49	0.0001
chr6_29747691_29748069.1	-0.1786	7.39394e-07	1	0	1	FALSE	HLA-F-AS1	0.576051	0.0263683	-980	-0.42	0.0017
chr6_30077050_30077503	-0.198422	1.26667e-06	0	0	0	FALSE	RNF39	0.826917	0.00411651	1163	-0.37	0.0022
chr6_30671870_30672048	-0.165014	5.75758e-07	2	1	3	FALSE	DHX16	0.514653	3.96643e-09	-989	-0.4	0.00085
chr6_30718072_30718263	-0.162573	3.28485e-06	2	2	4	FALSE	MDC1	0.642739	2.13035e-05	183	-0.36	0.006
chr6_30719040_30719420.1	-0.190872	1.36364e-06	2	2	4	FALSE	MDC1	0.642739	2.13035e-05	1151	-0.52	2.6e-05
chr6_31584185_31584500	-0.206987	5.45455e-08	0	1	1	FALSE	LST1	-1.60162	2.81338e-11	-1624	0.48	0.0001
chr6_31658950_31659765	-0.260514	8.9697e-07	3	3	6	FALSE	C6orf47	0.715066	2.27044e-06	-1007	-0.43	0.00033
chr6_31778290_31778634	-0.159856	1.27273e-07	0	0	0	FALSE	VWA7	0.962515	2.81774e-06	996	-0.49	4.1e-05
chr6_31971207_31971482	-0.173487	5.09091e-07	2	3	5	TRUE	DXO	0.501091	0.0115712	-810	-0.42	0.001
chr6_32128909_32129772	-0.187775	1.21212e-08	2	4	6	FALSE	FKBPL	0.502621	4.94869e-07	-519	-0.67	0
chr6_32128909_32129772.1	-0.187775	1.21212e-08	2	4	6	FALSE	ATF6B	0.795405	1.65205e-13	656	-0.56	3.2e-06
chr6_33201804_33202103	-0.227402	5.15152e-07	1	3	4	FALSE	SLC39A7	0.9985	5.32745e-09	1359	-0.5	4.6e-05
chr6_33392875_33393059	-0.198514	2.42424e-08	2	1	3	FALSE	KIFC1	3.87732	2.66662e-60	1339	-0.64	1.2e-08
chr6_34235369_34236252	0.370205	1.27273e-07	2	5	7	TRUE	HMGA1	1.65912	5.92517e-17	-621	0.33	0.0075
chr6_35921895_35922420	-0.224119	6.06061e-08	3	3	6	FALSE	SRPK1	0.932282	1.21562e-17	553	-0.54	4.9e-06
chr6_36441968_36442189	-0.17715	2e-06	2	1	3	FALSE	KCTD20	0.554799	1.15371e-07	-578	-0.5	2.2e-05
chr6_41040146_41040775	-0.208633	1.81818e-08	1	2	3	FALSE	TSPO2	2.46136	3.19483e-10	-1779	-0.61	1.1e-07
chr6_41162933_41163069	-0.362166	4.71515e-06	0	0	0	FALSE	TREM2	2.64563	1.83762e-15	-117	-0.4	0.00092
chr6_41919327_41920325	-0.192177	6.06061e-09	2	3	5	FALSE	MED20	0.974185	1.25224e-27	-814	-0.67	0
chr6_41919327_41920325.1	-0.192177	6.06061e-09	2	3	5	FALSE	BYSL	0.857709	2.64638e-10	-863	-0.63	4.8e-08
chr6_42747867_42749108.1	-0.193293	3.0303e-08	2	2	4	FALSE	TBCC	0.593424	2.76016e-09	1771	-0.63	5e-08
chr6_43022444_43022538	-0.192214	4.56364e-06	0	1	1	FALSE	RRP36	0.610824	2.04475e-12	799	-0.61	9.7e-08
chr6_43368168_43368459	-0.210741	0	1	3	4	FALSE	ZNF318	0.718985	2.75217e-12	-1019	-0.63	4.1e-08
chr6_43456486_43457530	-0.19237	3.0303e-08	0	0	0	FALSE	DLK2	1.18436	2.55504e-08	0	-0.52	9e-06
chr6_43458114_43458833	-0.187866	6.06061e-08	0	0	0	FALSE	DLK2	1.18436	2.55504e-08	1482	-0.48	5.8e-05
chr6_43630627_43630903.1	-0.159067	2.42424e-07	1	1	2	FALSE	GTPBP2	1.11988	3.60492e-13	1465	-0.47	0.00018
chr6_44219937_44220326	-0.267704	0	3	4	7	FALSE	SLC29A1	1.15436	4.68146e-08	432	-0.66	2.2e-09
chr6_44313696_44314098	-0.150137	6.36364e-07	0	0	0	FALSE	AARS2	0.909953	7.45723e-15	370	-0.55	2.1e-06
chr6_52283294_52283574	-0.224467	7.45455e-07	0	1	1	FALSE	MCM3	1.87798	1.57082e-28	-1307	-0.57	7.8e-07
chr6_52671586_52671938	-0.219925	9.93939e-07	1	1	2	FALSE	TMEM14A	0.718586	0.00167064	477	-0.65	6.6e-09
chr6_53792557_53793161	-0.186689	6.06061e-08	3	3	6	FALSE	AL590652.1	1.92465	4.49949e-06	-1113	-0.39	0.0022
chr6_57171798_57171852	-0.154636	1.53333e-06	2	3	5	FALSE	BAG2	0.832892	8.07815e-05	-474	-0.53	6.4e-06
chr6_107955731_107956252	-0.172663	1.15152e-07	2	3	5	FALSE	AL024507.2	0.745426	0.000733679	-1161	-0.52	2.4e-05
chr6_107958857_107959202	-0.233259	1.05455e-06	1	1	2	FALSE	AL024507.2	0.745426	0.000733679	1444	-0.4	0.0022
chr6_116764755_116765106	0.214469	7.21212e-07	0	1	1	TRUE	FAM162B	1.01684	0.000205689	-617	0.48	6.5e-05
chr6_133889000_133890152	0.189007	5.45455e-08	0	4	4	TRUE	TCF21	-1.81354	1.13001e-06	0	-0.39	0.0015
chr6_149862038_149862831.1	-0.18525	0	2	2	4	FALSE	LRP11	0.827195	4.96099e-05	-1195	-0.7	0
chr6_151493401_151493724	-0.243072	4.30303e-07	1	3	4	TRUE	CCDC170	2.80781	3.20108e-16	-306	-0.51	1.4e-05
chr6_151495545_151495882	-0.253177	2.42424e-08	1	0	1	FALSE	CCDC170	2.80781	3.20108e-16	1515	-0.46	0.0001
chr6_158650460_158650680	-0.202952	8.30303e-07	1	0	1	FALSE	SYTL3	-0.76287	0.0264619	446	0.37	0.0025
chr6_158870974_158871661	-0.198428	1.57576e-07	1	1	2	FALSE	C6orf99	-1.84812	0.000197622	1035	0.5	1.8e-05
chr6_159970548_159970820	-0.211822	1.38788e-06	2	3	5	FALSE	IGF2R	0.550807	0.00120925	1449	-0.43	0.00031
chr7_1138778_1139276	-0.187858	0	1	3	4	FALSE	C7orf50	0.700868	3.40068e-07	518	-0.64	1.2e-08
chr7_1461794_1461871	-0.191405	4e-07	1	1	2	FALSE	AC102953.1	1.00348	0.010044	1857	-0.44	0.00023
chr7_1569049_1569587	-0.235348	1.33333e-07	2	4	6	FALSE	PSMG3	0.715193	4.75208e-06	-1418	-0.64	3.2e-08
chr7_1570878_1571511	-0.243272	1.27273e-07	2	4	6	FALSE	PSMG3	0.715193	4.75208e-06	0	-0.59	6e-07
chr7_5514867_5515238	-0.26881	7.51515e-07	2	3	5	FALSE	FBXL18	1.81947	1.41941e-24	1069	-0.48	5.8e-05
chr7_5822378_5822692	-0.184984	0	2	3	5	FALSE	ZNF815P	0.777891	2.18357e-06	-468	-0.55	3.3e-06
chr7_6349239_6349773	-0.220079	0	3	2	5	FALSE	FAM220A	0.961351	2.47282e-20	258	-0.63	3e-08
chr7_10973244_10973352	-0.202823	1.29091e-06	3	5	8	FALSE	PHF14	0.520108	5.20889e-09	0	-0.33	0.0076
chr7_11181100_11181796	-0.164202	1.27273e-07	0	0	0	FALSE	AC004160.1	-2.68901	1.10563e-11	198	0.45	0.0002
chr7_15561580_15562360	-0.15023	7.87879e-08	2	4	6	FALSE	AGMO	-0.516236	0.0467047	0	-0.38	0.0017
chr7_22725097_22725875	-0.220671	3.57576e-07	0	0	0	FALSE	IL6	-2.6784	4.5522e-07	-9	0.35	0.007
chr7_30696447_30696672	-0.199791	1.40606e-06	0	0	0	FALSE	INMT	-2.44764	7.40589e-10	-1313	0.53	6.3e-06
chr7_30698084_30698417	-0.244487	1.00606e-06	0	0	0	FALSE	INMT	-2.44764	7.40589e-10	99	0.58	1.1e-06
chr7_32727136_32727331	-0.186309	1.27273e-07	1	1	2	FALSE	ZNRF2P1	0.558503	0.00515402	-1238	-0.4	0.001
chr7_32761414_32761873	0.177329	9.09091e-07	0	0	0	TRUE	DPY19L1P1	0.713944	0.000113906	0	0.44	0.00042
chr7_32762254_32762462	0.190411	1.27273e-07	0	0	0	TRUE	DPY19L1P1	0.713944	0.000113906	467	0.42	0.0012
chr7_38249121_38249520	-0.201716	7.93939e-07	0	0	0	FALSE	TRGC2	-1.35649	1.73846e-05	-52	0.59	2.9e-07
chr7_38265336_38265521	-0.186206	1e-06	0	1	1	FALSE	TRGC1	-1.16084	5.91184e-05	-157	0.37	0.0022
chr7_38299099_38300080	-0.299024	4.66667e-07	0	0	0	FALSE	TRGV10	-1.25051	0.000127016	-242	0.41	0.00056
chr7_38632018_38632377	-0.264726	1.82424e-06	0	0	0	FALSE	AMPH	-1.36107	8.96412e-05	451	0.37	0.0026
chr7_41692210_41692612	-0.157974	1.44848e-06	1	0	1	FALSE	INHBA-AS1	1.26182	0.000200625	-1304	-0.51	1.9e-05
chr7_41693235_41693452	-0.211805	4.84848e-07	0	0	0	FALSE	INHBA-AS1	1.26182	0.000200625	-464	-0.41	0.00079
chr7_41693752_41693915	-0.264922	6.9697e-07	0	0	0	FALSE	INHBA-AS1	1.26182	0.000200625	-1	-0.37	0.0021
chr7_55951357_55951623	-0.228532	1.61212e-06	2	2	4	FALSE	NIPSNAP2	0.513944	0.00708461	-170	-0.53	1.5e-05
chr7_56063430_56063859	-0.2092	0	2	1	3	FALSE	SUMF2	0.512434	4.55862e-06	-143	-0.64	1.6e-08
chr7_56065489_56065757	-0.190066	1e-06	2	3	5	FALSE	SUMF2	0.512434	4.55862e-06	1487	-0.45	0.00017
chr7_73579435_73580873	-0.157187	6.06061e-09	2	1	3	FALSE	TBL2	0.63603	6.52056e-10	644	-0.58	5.6e-07
chr7_74659330_74660026	-0.234333	4.54545e-07	2	4	6	FALSE	GTF2I	0.798793	4.59181e-08	1663	-0.5	2.4e-05
chr7_74966513_74967311	-0.438264	3.15152e-07	2	0	2	FALSE	CASTOR2	1.41685	1.78424e-10	1695	-0.51	1.7e-05
chr7_76360396_76360549	-0.164297	5.15152e-07	2	1	3	FALSE	YWHAG	0.545042	2.96009e-06	1365	-0.49	3.3e-05
chr7_76411070_76411437	-0.16106	2.89697e-06	0	0	0	FALSE	SSC4D	1.51746	1.8066e-07	1375	-0.34	0.0049
chr7_77121202_77121597.1	-0.153982	4.60606e-07	2	3	5	FALSE	CCDC146	-0.640729	0.0248996	-837	0.38	0.003
chr7_80920556_80921366	-0.318532	5.63636e-07	0	0	0	FALSE	SEMA3C	1.26248	0.0119817	-993	0.41	0.00068
chr7_80921592_80921869	-0.307478	4.97576e-06	0	0	0	FALSE	SEMA3C	1.26248	0.0119817	-490	0.42	0.00043
chr7_81768536_81768815	-0.273874	1e-06	1	2	3	FALSE	HGF	-2.55103	1.08269e-16	-1623	0.36	0.0032
chr7_81769899_81771133	-0.158943	5.69697e-07	2	5	7	FALSE	HGF	-2.55103	1.08269e-16	0	0.47	6.9e-05
chr7_81771642_81772340	-0.259713	5.15152e-07	0	1	1	FALSE	HGF	-2.55103	1.08269e-16	1204	0.47	8.2e-05
chr7_93889517_93889757	-0.231255	4e-07	0	0	0	FALSE	TFPI2	-2.78711	1.37779e-18	-1234	0.59	2.9e-07
chr7_93891326_93891884	-0.253633	1.01212e-06	0	0	0	FALSE	TFPI2	-2.78711	1.37779e-18	335	0.5	3e-05
chr7_99465132_99465513	-0.201901	6.9697e-07	2	3	5	FALSE	PTCD1	0.532892	0.00741618	-650	-0.53	2.2e-05
chr7_99506298_99506447	-0.175974	1.53333e-06	1	2	3	FALSE	ZKSCAN5	0.825931	8.47205e-22	1647	-0.57	1e-06
chr7_100125539_100126446	-0.207612	3.0303e-08	3	3	6	FALSE	MBLAC1	0.768844	6.16005e-05	-248	-0.6	3.2e-07
chr7_100125539_100126446.1	-0.207612	3.0303e-08	3	3	6	FALSE	AC073842.2	1.60652	1.80481e-05	-693	-0.45	0.00028
chr7_101153446_101153856	-0.186432	1.15152e-07	0	0	0	FALSE	AP1S1	0.501055	0.00048515	-544	-0.65	9.3e-09
chr7_101290722_101292342	-0.216989	4.24242e-08	0	0	0	FALSE	AZGP1P2	-1.63039	3.38993e-06	951	0.4	0.00081
chr7_127653734_127654435	-0.18217	2.24242e-07	2	3	5	FALSE	SND1	0.83168	2.15651e-09	1554	-0.51	1.4e-05
chr7_134528286_134528594	-0.224569	1.13939e-06	2	0	2	FALSE	AKR1B10	5.62484	7.38163e-25	694	-0.59	4.1e-07
chr7_135557212_135557466	-0.17286	1.57576e-07	2	3	5	FALSE	NUP205	1.09881	4.61467e-23	-453	-0.42	0.00047
chr7_142379608_142380129	-0.243288	3.45455e-07	0	0	0	FALSE	TRBV6-4	-1.25748	0.0226666	-677	0.38	0.0019
chr7_142381023_142381770	-0.270487	1.81818e-08	0	0	0	FALSE	TRBV6-4	-1.25748	0.0226666	217	0.35	0.0041
chr7_142795625_142796131.1	-0.175617	1.05455e-06	0	3	3	FALSE	TRBJ2-3	-1.24858	0.0015452	-716	0.47	0.00044
chr7_143382872_143383196	-0.176711	2.55152e-06	2	3	5	FALSE	ZYX	0.682262	0.000245676	1792	-0.44	0.00025
chr7_151342863_151343194	-0.187362	5.45455e-08	2	2	4	FALSE	NUB1	0.530359	3.22852e-05	1164	-0.6	2.1e-07
chr7_151409623_151410361	0.215469	1.02424e-06	1	1	2	TRUE	WDR86	-1.98611	7.8081e-13	-366	-0.48	0.00012
chr8_1754090_1754360	-0.264917	1.24242e-06	0	0	0	FALSE	CLN8	-1.11336	6.16405e-10	-1418	0.38	0.0017
chr8_1821993_1822825	-0.24299	5.09091e-07	0	0	0	FALSE	ARHGEF10	-1.17356	0.000935636	-1151	0.32	0.0085
chr8_1825670_1826086	-0.199061	9.09091e-07	0	0	0	FALSE	ARHGEF10	-1.17356	0.000935636	1694	0.38	0.0018
chr8_7018068_7018359	-0.302172	6.30303e-07	0	0	0	FALSE	DEFA3	-3.34395	2.47476e-07	0	0.53	5.9e-06
chr8_7018619_7018864	-0.35636	3.63636e-07	0	0	0	FALSE	DEFA3	-3.34395	2.47476e-07	318	0.52	9e-06
chr8_12944354_12944602	-0.278393	1.15152e-06	0	0	0	FALSE	TRMT9B	-1.28618	4.89156e-05	-1040	0.49	3.3e-05
chr8_22986847_22987499	-0.169633	2.60606e-07	0	0	0	FALSE	RHOBTB2	0.741406	1.14012e-05	0	-0.49	4e-05
chr8_28492406_28492859	-0.20059	6.06061e-08	0	1	1	FALSE	FZD3	0.602962	0.0160354	-1346	-0.34	0.0055
chr8_37848813_37849143	-0.171455	2.52727e-06	2	2	4	FALSE	BRF2	0.519011	5.47942e-05	-761	-0.43	0.00039
chr8_41527595_41527818	-0.186663	1.58182e-06	0	0	0	FALSE	GINS4	2.35697	3.38833e-30	-1388	-0.51	1.3e-05
chr8_48382496_48383264	-0.231022	6.06061e-08	0	0	0	FALSE	RPL29P19	-1.34944	0.000165335	-1326	0.43	0.00029
chr8_52745806_52746113	-0.168256	1.64242e-06	0	0	0	FALSE	RB1CC1	0.58731	9.22741e-05	0	-0.46	0.00012
chr8_52746859_52747004	-0.197001	8.48485e-07	0	0	0	FALSE	RB1CC1	0.58731	9.22741e-05	1016	-0.44	0.00025
chr8_60516096_60516314	-0.253872	3.0303e-08	2	2	4	FALSE	LINC01301	0.956488	7.65746e-05	-481	-0.52	1.7e-05
chr8_65634940_65635952	-0.229282	6.66667e-08	3	4	7	FALSE	ARMC1	0.616087	3.06308e-05	723	-0.59	2.8e-07
chr8_70405221_70405903	-0.212684	1.58182e-06	1	2	3	FALSE	NCOA2	0.557576	0.000403256	1416	-0.51	1.6e-05
chr8_75324932_75325270	-0.219667	0	0	0	0	FALSE	CASC9	3.54111	1.42238e-07	191	-0.41	0.00056
chr8_78665124_78665333	-0.198091	5.69697e-07	3	3	6	FALSE	ZC2HC1A	1.24495	3.00361e-06	-714	-0.5	2.2e-05
chr8_80030886_80031307.1	-0.220274	8.48485e-08	2	3	5	FALSE	AC009686.2	0.884903	0.00190123	-1993	-0.49	7e-05
chr8_81521718_81522140	-0.223399	7.21212e-07	0	0	0	TRUE	FTH1P11	0.622894	0.00416324	-92	-0.45	0.00016
chr8_81522809_81523384	-0.24513	1.27273e-07	0	0	0	FALSE	FTH1P11	0.622894	0.00416324	577	-0.49	2.9e-05
chr8_93741438_93742010	-0.191073	1.81818e-08	3	5	8	FALSE	RBM12B	0.895561	3.17178e-23	421	-0.66	3e-09
chr8_93741438_93742010.1	-0.191073	1.81818e-08	3	5	8	FALSE	RBM12B-AS1	0.905521	0.000165745	1317	-0.62	1.2e-07
chr8_94897345_94897738	-0.158292	2.28485e-06	1	1	2	FALSE	CCNE2	2.50827	4.14919e-26	667	-0.51	2.8e-05
chr8_97278526_97279035	-0.152615	8.48485e-08	0	0	0	FALSE	TSPYL5	-1.69764	8.11943e-11	562	0.39	0.0012
chr8_97643008_97643109	-0.229905	2.24242e-07	1	3	4	FALSE	MTDH	0.636785	0.000259867	-1070	-0.63	2.7e-08
chr8_98294642_98294932	-0.209091	1.21212e-07	3	4	7	FALSE	NIPAL2	0.932313	8.83504e-05	249	-0.54	3.4e-06
chr8_100144440_100144804	-0.201012	4.84848e-08	1	0	1	FALSE	FBXO43	3.4869	3.15828e-30	-996	-0.69	0
chr8_100145087_100145514	-0.179695	0	3	1	4	TRUE	FBXO43	3.4869	3.15828e-30	-286	-0.73	0
chr8_100723300_100723402	-0.151747	3.0303e-08	1	2	3	FALSE	PABPC1	1.14676	2.71999e-10	491	-0.5	2.5e-05
chr8_101203868_101204342	-0.160374	0	3	5	8	FALSE	ZNF706	0.614353	1.12728e-05	-1851	-0.59	2.7e-07
chr8_102805270_102806000	-0.245579	0	1	0	1	FALSE	GASAL1	1.12931	0.000119753	0	-0.57	9.1e-07
chr8_103370295_103370423	-0.190608	0	0	0	0	FALSE	CTHRC1	4.52984	5.05263e-34	-1092	-0.54	3.9e-06
chr8_103371342_103371698	0.212505	1.15758e-06	0	1	1	TRUE	CTHRC1	4.52984	5.05263e-34	0	0.39	0.0014
chr8_103372245_103372321	-0.200953	4.23636e-06	1	0	1	TRUE	CTHRC1	4.52984	5.05263e-34	730	-0.5	2.5e-05
chr8_104587096_104587607	-0.213723	1.53333e-06	2	0	2	FALSE	LRP12	1.89053	4.00552e-11	-1417	-0.32	0.0099
chr8_106058362_106058969	-0.276371	0	2	0	2	FALSE	ZFPM2-AS1	4.42675	4.89939e-18	-1555	-0.38	0.0018
chr8_108786277_108786722	-0.196187	5.15152e-07	0	1	1	FALSE	TMEM74	2.63646	2.64112e-20	-893	-0.54	5.1e-06
chr8_118283177_118283557	-0.225805	2.07273e-06	0	0	0	FALSE	AC023590.1	-2.0296	2.9115e-09	1038	0.4	0.0008
chr8_120445922_120446316	-0.204787	1.57576e-07	2	3	5	FALSE	MRPL13	0.573175	0.00813156	520	-0.56	3.6e-06
chr8_120445922_120446316.1	-0.204787	1.57576e-07	2	3	5	FALSE	MTBP	2.14104	6.32396e-42	522	-0.54	7.2e-06
chr8_123042906_123043557	-0.171169	7.27273e-08	3	5	8	FALSE	DERL1	0.531176	0.00123509	483	-0.43	0.0006
chr8_123042906_123043557.1	-0.171169	7.27273e-08	3	5	8	FALSE	TBC1D31	1.64972	2.92736e-27	938	-0.59	5.6e-07
chr8_124972608_124973000	-0.203962	8.84848e-07	3	3	6	FALSE	ZNF572	1.25588	2.21242e-13	-298	-0.64	1.2e-08
chr8_124997402_124997655	-0.162057	1.70909e-06	2	2	4	FALSE	SQLE	1.7618	7.80285e-10	-842	-0.47	8.9e-05
chr8_124999496_125001078	-0.225932	1.2e-06	2	3	5	TRUE	SQLE	1.7618	7.80285e-10	999	-0.7	0
chr8_140510141_140510380	-0.222118	4.90909e-07	2	3	5	FALSE	CHRAC1	0.622275	3.60831e-07	-918	-0.54	4.6e-06
chr8_142680262_142680420	-0.267767	1.21212e-07	0	0	0	FALSE	JRK	1.06214	3.25083e-08	-1548	-0.48	5.8e-05
chr8_142680788_142681112	-0.221759	2.57576e-06	0	0	0	FALSE	JRK	1.06214	3.25083e-08	-856	-0.36	0.0034
chr8_142683004_142683294	-0.272672	8.24242e-07	0	0	0	FALSE	JRK	1.06214	3.25083e-08	1036	-0.41	0.00074
chr8_142726063_142726385	-0.23558	1.69697e-07	3	5	8	FALSE	THEM6	0.794822	1.8265e-05	-818	-0.61	1.1e-07
chr8_143019345_143019701	0.230764	7.75758e-07	1	4	5	FALSE	LY6E	-1.46082	1.80112e-05	1363	-0.47	0.00014
chr8_143245075_143245394	-0.186088	4.84848e-08	0	0	0	FALSE	ZFP41	1.60839	6.7642e-25	-1427	-0.53	6.6e-06
chr8_143247766_143248069	-0.18837	1.51515e-07	3	2	5	FALSE	ZFP41	1.60839	6.7642e-25	945	-0.62	5.9e-08
chr8_143280873_143281404	-0.187005	0	2	3	5	FALSE	MINCR	0.838532	0.00282461	-286	-0.5	2.8e-05
chr8_143358476_143359230	-0.179225	3.27273e-07	0	0	0	FALSE	TOP1MT	0.687675	4.05747e-05	-749	-0.33	0.0066
chr8_143540525_143540784	-0.17025	2.63636e-06	1	2	3	FALSE	ZC3H3	0.923568	8.46588e-08	-669	-0.58	6.7e-07
chr8_143573090_143573277	-0.178766	2.72727e-07	0	0	0	FALSE	MROH6	1.22565	3.11191e-05	119	-0.34	0.0055
chr8_143610449_143610706	-0.168748	1.27273e-07	1	0	1	FALSE	PYCR3	0.961247	5.15345e-09	676	-0.62	7.5e-08
chr8_143735039_143735489	-0.164069	6.66667e-08	0	0	0	FALSE	FAM83H	1.21303	9.70155e-13	1238	-0.54	1.3e-05
chr8_143735039_143735489.1	-0.164069	6.66667e-08	0	0	0	FALSE	MIR4664	1.9693	5.31877e-15	1886	-0.49	7.8e-05
chr8_144290455_144290646	-0.160034	4.84848e-07	2	1	3	TRUE	BOP1	1.5581	2.35803e-16	-724	-0.58	1.3e-06
chr8_144290455_144290646.1	-0.160034	4.84848e-07	2	1	3	TRUE	HSF1	0.670255	7.21093e-06	-945	-0.51	2.6e-05
chr8_144292758_144292918	-0.170855	8.30303e-07	2	3	5	FALSE	HSF1	0.670255	7.21093e-06	1167	-0.66	4.2e-09
chr8_144292758_144292918.1	-0.170855	8.30303e-07	2	3	5	FALSE	BOP1	1.5581	2.35803e-16	1388	-0.67	0
chr8_144354013_144354477	0.155725	1.27273e-07	0	0	0	TRUE	SLC52A2	1.46185	1.11226e-12	0	0.46	0.0001
chr8_144357268_144357581	-0.173942	4.60606e-07	1	1	2	FALSE	FBXL6	0.509566	0.00576412	-1795	-0.45	0.00016
chr8_144429377_144429784	-0.150665	1.21212e-06	3	5	8	TRUE	VPS28	0.532643	9.78998e-05	814	-0.52	1e-05
chr8_144516738_144517021	-0.206208	0	1	1	2	FALSE	RECQL4	1.96068	8.13311e-20	-824	-0.61	2.6e-07
chr8_144516738_144517021.1	-0.206208	0	1	1	2	FALSE	LRRC14	1.24138	2.46876e-19	-971	-0.63	7.6e-08
chr8_144799666_144800115	-0.236019	1.21212e-07	2	2	4	FALSE	ZNF517	1.22287	1.39893e-10	790	-0.63	3.4e-08
chr8_144851912_144852089	-0.187303	3.33333e-07	2	1	3	FALSE	COMMD5	0.712932	2.9397e-07	-1647	-0.62	6.5e-08
chr9_5830879_5831364	-0.162825	9.09091e-08	1	0	1	FALSE	ERMP1	1.39456	7.57481e-14	-1753	-0.65	4.6e-09
chr9_13279959_13280187	-0.169153	1.27273e-07	3	3	6	FALSE	MPDZ	-0.81036	0.00358997	369	0.37	0.0022
chr9_19103289_19103875	-0.211683	2.79394e-06	3	5	8	FALSE	HAUS6	0.620242	3.81067e-08	170	-0.5	2.7e-05
chr9_20656678_20657753	-0.164456	4.54545e-07	0	0	0	FALSE	FOCAD	0.914701	8.32403e-09	-556	-0.49	3.3e-05
chr9_25679779_25680520	-0.231097	1.53333e-06	0	0	0	FALSE	TUSC1	-0.879313	8.87484e-05	1339	0.38	0.0017
chr9_32382987_32383170	0.160543	7.87879e-08	0	1	1	FALSE	ACO1	-0.849489	4.64428e-06	-1433	-0.39	0.0015
chr9_35079059_35079226	-0.15075	1.09091e-07	1	3	4	FALSE	FANCG	1.21209	1.07869e-15	-790	-0.52	1e-05
chr9_35675213_35675675	0.214549	0	0	0	0	TRUE	ARHGEF39	2.39566	2.92968e-26	-191	0.67	0
chr9_35908120_35908357.1	-0.204971	4.24242e-08	1	1	2	FALSE	HRCT1	2.46222	9.82156e-12	1928	-0.62	1.1e-07
chr9_36571622_36572012	-0.154303	4e-07	3	0	3	FALSE	MELK	4.0651	2.76307e-55	-850	-0.5	2.1e-05
chr9_36572278_36572517	-0.242378	1.27273e-07	3	2	5	FALSE	MELK	4.0651	2.76307e-55	-345	-0.45	0.00018
chr9_74951317_74951587	-0.194702	6.06061e-09	2	0	2	FALSE	C9orf40	0.829098	1.6835e-06	-1299	-0.66	2.6e-09
chr9_74953266_74953613	-0.185258	4.12121e-07	3	5	8	FALSE	C9orf40	0.829098	1.6835e-06	380	-0.45	0.00015
chr9_81977787_81978142	-0.185334	6.36364e-07	0	0	0	FALSE	AL162726.3	2.12701	5.30173e-05	173	-0.52	1.7e-05
chr9_83537286_83537561	0.207094	5.0303e-07	0	1	1	TRUE	FRMD3	1.35473	9.94617e-06	-985	0.36	0.0032
chr9_83981698_83982074	-0.19895	0	3	4	7	FALSE	RMI1	0.855327	5.86914e-09	987	-0.69	0
chr9_94031568_94031771	-0.210477	2.06061e-06	1	2	3	FALSE	PTPDC1	1.03357	8.17378e-10	774	-0.46	0.00013
chr9_98193486_98193666	-0.164506	2.49091e-06	1	5	6	FALSE	CORO2A	0.628669	0.00130246	846	-0.44	0.00022
chr9_109167825_109168143	-0.158828	1.81818e-08	0	0	0	FALSE	FRRS1L	7.18746	3.08007e-26	530	-0.56	2e-06
chr9_120578723_120579075	-0.252988	1.45455e-07	1	2	3	FALSE	CDK5RAP2	0.664516	9.72665e-08	-1095	-0.45	0.00017
chr9_120894397_120894536	0.21546	1.27273e-06	0	0	0	TRUE	PHF19	1.10161	7.37521e-09	-360	0.51	1.7e-05
chr9_120895133_120895413	-0.221744	1.81818e-08	0	0	0	FALSE	PHF19	1.10161	7.37521e-09	237	-0.32	0.0083
chr9_125238576_125239606	-0.229098	2.72727e-07	2	3	5	FALSE	HSPA5	0.860204	1.96682e-05	-1724	-0.57	1e-06
chr9_128205037_128205179	-0.163551	9.15152e-07	0	0	0	FALSE	CIZ1	0.644996	2.65182e-06	654	-0.34	0.005
chr9_132768143_132768416	-0.220018	2.42424e-07	0	1	1	FALSE	AL445645.1	-0.942858	0.00893979	-1796	0.37	0.0022
chr9_132879114_132879285	0.1918	3.63636e-07	0	2	2	TRUE	SPACA9	0.770135	3.5193e-05	1087	0.48	6.3e-05
chr9_133586908_133587104	-0.293708	2.23636e-06	0	0	0	FALSE	FAM163B	-2.65472	9.38495e-07	711	0.56	9.2e-07
chr9_133633242_133633402	-0.213088	1.38788e-06	0	0	0	FALSE	DBH	-3.0588	2.18529e-31	-1946	0.5	2.5e-05
chr9_133635898_133636006	-0.260957	2.72121e-06	0	0	0	FALSE	DBH	-3.0588	2.18529e-31	550	0.45	0.00016
chr9_133636377_133637770	-0.306789	4.60606e-07	0	0	0	FALSE	DBH	-3.0588	2.18529e-31	1029	0.5	2.9e-05
chr9_134069155_134069422	-0.192435	1.27273e-07	1	2	3	FALSE	BRD3	0.546335	0.00271491	620	-0.49	3.5e-05
chr9_135074652_135074799	-0.292141	5.09697e-06	0	0	0	FALSE	OLFM1	-1.69692	6.86185e-06	-623	0.68	0
chr9_136120442_136120814	-0.200931	4.24242e-08	0	1	1	FALSE	TMEM250	0.624738	2.98631e-07	1579	-0.46	0.00011
chr9_136246211_136246394	-0.221381	0	0	0	0	FALSE	QSOX2	0.656713	1.22255e-06	370	-0.61	1.2e-07
chr9_136615487_136617059	-0.184371	3.63636e-08	0	0	0	FALSE	LINC01451	2.72005	8.04492e-11	-122	-0.48	6.1e-05
chr9_136794729_136795676	-0.201012	6.06061e-08	0	0	0	FALSE	CCDC183	0.569766	0.0385266	-674	-0.48	4.7e-05
chr9_136797382_136798298	-0.174077	6.06061e-09	0	0	0	FALSE	CCDC183	0.569766	0.0385266	1032	-0.42	0.0012
chr9_136845510_136847303	0.239874	1.06667e-06	1	2	3	TRUE	AJM1	0.589553	0.0170606	1095	0.4	0.0019
chr9_136845510_136847303.1	0.239874	1.06667e-06	1	2	3	TRUE	PHPT1	0.636932	1.6441e-05	-1421	0.42	0.00088
chr9_137047679_137048167	-0.248377	1.00606e-06	0	0	0	FALSE	NPDC1	-1.15567	2.90122e-09	1476	0.41	0.00066
chr9_137242545_137242770	-0.213212	1.33939e-06	1	1	2	FALSE	TUBB4B	0.528858	0.000512435	1332	-0.46	0.0001
chrX_49265321_49265748	-0.213476	7.04242e-06	0	0	0	FALSE	FOXP3	0.998067	0.0242603	495	-0.41	0.00066
chrX_51329358_51330847	-0.293113	1.27273e-07	0	0	0	FALSE	NUDT10	-4.05681	1.94954e-34	-1384	0.65	2.5e-09
chrX_51331216_51331935	-0.315308	1.33333e-07	0	0	0	FALSE	NUDT10	-4.05681	1.94954e-34	-296	0.63	1.8e-08
chrX_64306436_64307178	-0.309317	1.81818e-08	0	0	0	FALSE	AL356317.1	-1.86213	1.35065e-05	0	0.57	6.5e-07
chrX_71073146_71073385	-0.271045	1.0303e-07	0	0	0	FALSE	SNX12	0.546336	7.90665e-09	-41	-0.59	4e-07
chrX_103093969_103094662	-0.279948	6.06061e-08	0	0	0	TRUE	NXF3	-4.69081	2.91182e-59	844	0.68	2.8e-10
chrX_106998446_106998848	-0.221614	2.42424e-08	1	2	3	FALSE	MORC4	0.559343	0.00648886	-1396	-0.46	0.00013
chrX_110004119_110004447	-0.273424	1.27273e-07	0	1	1	FALSE	TMEM164	1.32651	2.48357e-09	1488	-0.45	0.00015
chrX_115017185_115018236	-0.286171	2.78788e-07	0	0	0	FALSE	IL13RA2	-4.32049	5.57335e-36	-1741	0.51	1.6e-05
chrX_115021259_115021700	-0.234022	1.27273e-07	0	0	0	FALSE	IL13RA2	-4.32049	5.57335e-36	1282	0.5	2.7e-05
chrX_129539472_129539766	-0.224991	3.45455e-07	0	1	1	FALSE	OCRL	0.631777	4.75714e-07	-83	-0.47	9.2e-05
chrX_129844659_129844957	-0.224824	0	0	0	0	FALSE	ZDHHC9	0.744592	3.12857e-06	750	-0.66	8.2e-10
chrX_133987205_133987743	-0.242295	7.39394e-07	1	0	1	FALSE	GPC3	6.2042	1.17106e-49	1310	-0.66	1.3e-09
chrX_153725519_153725720.1	-0.305182	2.19394e-06	0	1	1	TRUE	BCAP31	0.897735	1.81597e-10	773	-0.52	1.9e-05
chrX_153831588_153832113	-0.268323	4.12121e-07	0	0	0	FALSE	PDZD4	-1.45926	6.79795e-06	1023	0.63	4.2e-08
chrX_154444946_154445335	-0.209916	4.24242e-07	0	0	0	FALSE	FAM50A	0.950935	1.28594e-14	820	-0.52	8.5e-06
chrX_154540252_154540394	-0.176637	2.65455e-06	0	0	0	FALSE	IKBKG	0.740175	0.000399469	-805	-0.55	2.4e-06
chrX_154545663_154545813	-0.267978	3.42424e-06	2	0	2	FALSE	G6PD	2.39339	9.48826e-15	-1759	-0.5	2.6e-05
chrX_154546036_154546181	-0.269707	1.75758e-06	2	0	2	FALSE	G6PD	2.39339	9.48826e-15	-1391	-0.59	4e-07

## Sheet: Table S2.1.2
Table S2.1.2 Summarized information of high-confidence promoter-like DMR-DEGs
DMR.ID	Delta.Methy	DM.Pvalue	PromoterLike.T	PromoterLike.N	PromoterLike.score	CpGIsland	gene_name	DEG.LFC	DEG.padj	distance	MethyandGene.rho	MethyandGene.padj	pairID	pairType	LIHC.Replication
chr19_2901759_2902227	-0.232473	1.67273e-06	1	1	2	TRUE	ZNF57	1.08789	0.00192228	861	-0.56	1.9e-06	chr19_2901759_2902227|ZNF57	HypoUp	Type I failure
chr6_160122738_160123492	0.25032	1.27273e-07	0	1	1	FALSE	SLC22A1	-2.54267	1.90109e-07	949	-0.73	0	chr6_160122738_160123492|SLC22A1	HyperDown	Type I failure
chr10_17386395_17387833	-0.320838	3.0303e-08	1	0	1	FALSE	ST8SIA6-AS1	6.225	1.47696e-30	0	-0.65	3.1e-09	chr10_17386395_17387833|ST8SIA6-AS1	HypoUp	Type I failure
chr1_26862894_26863264	-0.259245	2.24242e-07	1	0	1	FALSE	SFN	5.30015	1.19335e-30	0	-0.69	0	chr1_26862894_26863264|SFN	HypoUp	Replicated
chr11_5690208_5690879	0.25504	2.63636e-06	0	1	1	FALSE	TRIM22	-0.959038	0.000110626	519	-0.56	2e-06	chr11_5690208_5690879|TRIM22	HyperDown	Type I failure
chr14_73592627_73592901	-0.24458	9.09091e-08	1	0	1	FALSE	ACOT4	-0.524302	0.0131628	921	-0.33	0.0073	chr14_73592627_73592901|ACOT4	HypoUp	Type I failure
chr8_85465316_85466086	0.171075	4.12121e-07	0	1	1	FALSE	CA2	-2.13724	9.89294e-17	1464	-0.44	0.00056	chr8_85465316_85466086|CA2	HyperDown	Type I failure
chr8_144825398_144826455	-0.253196	1.21212e-08	2	0	2	FALSE	ZNF7	0.761874	4.12713e-09	-1009	-0.55	2.8e-06	chr8_144825398_144826455|ZNF7	HypoUp	Replicated
chr1_58575901_58577030	0.316119	0	0	1	1	TRUE	TACSTD2	-2.31267	2.91514e-08	-743	-0.39	0.0012	chr1_58575901_58577030|TACSTD2	HyperDown	Replicated
chr15_23565016_23566853	-0.34681	6.66667e-08	0	0	0	TRUE	MKRN3	4.39806	5.17513e-15	0	-0.71	1.8e-11	chr15_23565016_23566853|MKRN3	HypoUp	Replicated
chr19_51140028_51141368	-0.308959	0	0	1	1	FALSE	SIGLEC7	-1.50244	1.93474e-08	-931	0.59	3.3e-07	chr19_51140028_51141368|SIGLEC7	HypoDown	Replicated
chr19_51141611_51144822	-0.284836	0	0	1	1	FALSE	SIGLEC7	-1.50244	1.93474e-08	0	0.52	2.4e-05	chr19_51141611_51144822|SIGLEC7	HypoDown	Replicated
chr7_101199961_101200475	-0.253091	0	1	0	1	FALSE	MOGAT3	1.48768	4.75798e-06	-563	-0.74	0	chr7_101199961_101200475|MOGAT3	HypoUp	Type I failure
chr7_128030940_128032690	0.368189	6.06061e-08	0	1	1	TRUE	LRRC4	-2.08275	3.20108e-16	0	-0.53	7.2e-06	chr7_128030940_128032690|LRRC4	HyperDown	Replicated
chr8_101492028_101494873	0.295836	6.06061e-09	0	3	3	TRUE	GRHL2	-3.35792	9.53095e-16	0	-0.52	9.7e-06	chr8_101492028_101494873|GRHL2	HyperDown	Replicated
chr1_151071555_151072014.1	-0.196457	1.93939e-07	1	2	3	FALSE	CDC42SE1	0.625658	1.46085e-05	1230	-0.38	0.004	chr1_151071555_151072014|CDC42SE1	HypoUp	Type I failure
chr1_167913914_167914291	-0.207816	3.0303e-08	0	1	1	FALSE	ADCY10	-0.677055	0.0403956	0	-0.32	0.0089	chr1_167913914_167914291|ADCY10	HypoUp	Replicated
chr1_232806147_232807065	-0.272981	0	0	1	1	FALSE	MAP10	1.15381	2.60403e-08	1255	-0.81	0	chr1_232806147_232807065|MAP10	HypoUp	Type I failure
chr11_2171347_2177982	-0.293366	1.81818e-07	0	0	0	FALSE	TH	-5.66693	1.84465e-48	0	0.66	1.7e-09	chr11_2171347_2177982|TH	HypoDown	Type II failure
chr11_9262952_9264039	-0.238818	5.81818e-07	1	0	1	FALSE	DENND5A	0.586328	1.17761e-05	-1351	-0.46	0.00013	chr11_9262952_9264039|DENND5A	HypoUp	Replicated
chr11_129816760_129817336	-0.259242	0	1	1	2	FALSE	TMEM45B	1.75278	1.26652e-05	941	-0.47	7.9e-05	chr11_129816760_129817336|TMEM45B	HypoUp	Type I failure
chr12_2877946_2878599	-0.151114	3.63636e-07	1	1	2	FALSE	TULP3	0.904438	2.21121e-11	723	-0.44	0.00087	chr12_2877946_2878599|TULP3	HypoUp	Type I failure
chr17_36001250_36001738	-0.186424	4.84848e-08	0	1	1	FALSE	CCL15	0.710918	0.0394	-300	-0.48	0.00019	chr17_36001250_36001738|CCL15	HypoUp	Replicated
chr19_44889480_44890162	-0.191317	0	1	0	1	FALSE	TOMM40	0.775941	6.41661e-11	-407	-0.63	4.8e-08	chr19_44889480_44890162|TOMM40	HypoUp	Type I failure
chr19_45493483_45496092	-0.23632	0	0	0	0	TRUE	RTN2	1.18135	1.22201e-06	-969	-0.46	0.00013	chr19_45493483_45496092|RTN2	HypoUp	Replicated
chr2_199468584_199470830	0.268638	4.24242e-08	0	1	1	TRUE	SATB2	0.593301	0.00822138	-436	0.53	6e-06	chr2_199468584_199470830|SATB2	HyperUp	Replicated
chr20_10368346_10368956	-0.211498	3.35152e-06	1	0	1	FALSE	SNAP25-AS1	1.42091	0.000153373	0	-0.47	9.5e-05	chr20_10368346_10368956|SNAP25-AS1	HypoUp	Type I failure
chr20_33719084_33719715	-0.233582	0	1	0	1	FALSE	PXMP4	0.71159	1.90352e-05	-604	-0.75	0	chr20_33719084_33719715|PXMP4	HypoUp	Type I failure
chr20_57558099_57559732	-0.222227	3.0303e-08	2	2	4	FALSE	PCK1	-3.37926	3.15379e-15	-1348	0.46	0.00012	chr20_57558099_57559732|PCK1	HypoDown	Replicated
chr3_160401601_160402754	-0.238396	0	1	2	3	FALSE	IFT80	0.827247	1.60789e-05	1721	-0.76	0	chr3_160401601_160402754|IFT80	HypoUp	Type I failure
chr4_52051223_52052036	0.255727	1.15152e-07	0	1	1	TRUE	SPATA18	-2.51048	2.11107e-18	0	-0.56	1.9e-06	chr4_52051223_52052036|SPATA18	HyperDown	Replicated
chr4_74099860_74100270	-0.206241	2.42424e-08	1	2	3	FALSE	CXCL2	-3.29148	2.84336e-20	567	0.45	0.00015	chr4_74099860_74100270|CXCL2	HypoDown	Replicated
chr5_177304722_177305183.1	-0.192951	2.72727e-07	0	1	1	FALSE	RAB24	0.623197	2.0423e-05	978	-0.5	5.6e-05	chr5_177304722_177305183|RAB24	HypoUp	Replicated
chr5_177310641_177311415	-0.175372	6.06061e-09	0	2	2	TRUE	MXD3	1.52444	2.33968e-08	-1342	-0.74	0	chr5_177310641_177311415|MXD3	HypoUp	Type I failure
chr5_177312688_177313147	-0.220894	3.0303e-08	1	0	1	TRUE	MXD3	1.52444	2.33968e-08	0	-0.61	1.1e-07	chr5_177312688_177313147|MXD3	HypoUp	Replicated
chr1_9540453_9542091	-0.355264	0	1	3	4	TRUE	SLC25A33	0.529748	0.0251806	971	-0.63	2.5e-08	chr1_9540453_9542091|SLC25A33	HypoUp	Replicated
chr1_118983368_118990519	0.310288	0	0	1	1	TRUE	TBX15	-1.12244	0.00548862	0	-0.4	0.00098	chr1_118983368_118990519|TBX15	HyperDown	Replicated
chr1_151131050_151132521	0.279609	1.81818e-08	0	3	3	TRUE	AL592424.1	1.2057	0.000806617	0	0.58	2.9e-07	chr1_151131050_151132521|AL592424.1	HyperUp	Type II failure
chr1_151196584_151197986	-0.284296	1.81818e-08	2	1	3	FALSE	PIP5K1A	0.625184	6.22384e-09	0	-0.51	2.6e-05	chr1_151196584_151197986|PIP5K1A	HypoUp	Replicated
chr1_151196584_151197986.1	-0.284296	1.81818e-08	2	1	3	FALSE	VPS72	1.16134	3.88151e-53	1263	-0.63	4.8e-08	chr1_151196584_151197986|VPS72	HypoUp	Replicated
chr1_153391013_153391928	-0.346344	0	0	1	1	FALSE	S100A8	-2.363	8.73723e-09	0	0.56	1.4e-06	chr1_153391013_153391928|S100A8	HypoDown	Replicated
chr1_212283558_212284485	-0.260869	6.06061e-09	1	2	3	TRUE	PPP2R5A	0.557397	0.000112077	-1052	-0.56	1.4e-06	chr1_212283558_212284485|PPP2R5A	HypoUp	Replicated
chr1_225997650_225998427	-0.266465	0	1	0	1	FALSE	SDE2	0.583425	7.78551e-07	-904	-0.62	5e-08	chr1_225997650_225998427|SDE2	HypoUp	Type II failure
chr10_6577845_6579534	-0.280762	3.63636e-08	1	0	1	FALSE	PRKCQ-AS1	-0.914414	0.00978235	-885	0.41	0.0014	chr10_6577845_6579534|PRKCQ-AS1	HypoDown	Type II failure
chr10_6581672_6582764	-0.450198	0	0	1	1	FALSE	PRKCQ-AS1	-0.914414	0.00978235	1253	0.5	4e-05	chr10_6581672_6582764|PRKCQ-AS1	HypoDown	Type I failure
chr10_12193886_12194470	-0.422928	0	1	0	1	FALSE	CDC123	0.564479	2.66798e-10	-1495	-0.65	1.7e-08	chr10_12193886_12194470|CDC123	HypoUp	Type I failure
chr12_93314940_93315756	-0.317645	0	1	0	1	FALSE	AC124947.2	1.41329	2.98588e-06	131	-0.68	0	chr12_93314940_93315756|AC124947.2	HypoUp	Type I failure
chr13_64076307_64079199	-0.352519	3.0303e-08	1	0	1	TRUE	LINC00355	6.60291	3.95605e-14	263	-0.55	3e-06	chr13_64076307_64079199|LINC00355	HypoUp	Type I failure
chr14_21022886_21023796	0.292283	0	0	1	1	FALSE	TPPP2	-2.93108	1.36873e-15	-313	-0.79	0	chr14_21022886_21023796|TPPP2	HyperDown	Replicated
chr14_21022886_21023796.1	0.292283	0	0	1	1	FALSE	AL161668.4	-2.49295	2.16299e-09	-376	-0.79	0	chr14_21022886_21023796|AL161668.4	HyperDown	Type II failure
chr14_53955729_53957065	0.351799	2.42424e-08	1	1	2	TRUE	BMP4	1.82232	2.82742e-09	-1696	0.47	7.3e-05	chr14_53955729_53957065|BMP4	HyperUp	Replicated
chr14_54397619_54398535	-0.309772	0	1	0	1	FALSE	CDKN3	3.95293	1.86894e-48	770	-0.8	0	chr14_54397619_54398535|CDKN3	HypoUp	Replicated
chr14_97975268_97976953	-0.322764	2.42424e-08	1	0	1	FALSE	LINC01550	-1.82696	6.00549e-07	-1171	0.53	8.2e-06	chr14_97975268_97976953|LINC01550	HypoDown	Type I failure
chr15_45129091_45130257	0.307066	0	0	1	1	TRUE	DUOX1	2.64042	2.85872e-21	0	0.55	2.1e-06	chr15_45129091_45130257|DUOX1	HyperUp	Replicated
chr15_90992950_90993649	-0.301999	0	0	1	1	FALSE	PRC1	2.18611	2.36975e-08	-1980	-0.65	4.7e-09	chr15_90992950_90993649|PRC1	HypoUp	Replicated
chr19_573758_574830	-0.262422	0	1	0	1	TRUE	AC009005.1	1.92249	1.70153e-07	1530	-0.49	4e-05	chr19_573758_574830|AC009005.1	HypoUp	Type I failure
chr19_41498811_41501828	-0.280123	1.21212e-08	1	2	3	FALSE	PCAT19	-0.969783	4.08701e-05	0	0.43	0.00039	chr19_41498811_41501828|PCAT19	HypoDown	Type II failure
chr19_41502045_41503175	-0.259559	0	0	1	1	FALSE	PCAT19	-0.969783	4.08701e-05	1396	0.33	0.007	chr19_41502045_41503175|PCAT19	HypoDown	Type I failure
chr19_49960360_49962644	-0.299361	6.06061e-09	0	0	0	FALSE	SIGLEC11	-2.57038	2.19573e-20	0	0.53	6.1e-06	chr19_49960360_49962644|SIGLEC11	HypoDown	Replicated
chr19_54254470_54258325	-0.256257	1.21212e-08	0	1	1	FALSE	LILRB5	-2.25088	3.85312e-21	0	0.47	7.8e-05	chr19_54254470_54258325|LILRB5	HypoDown	Replicated
chr19_54276184_54281924	-0.290493	1.81818e-08	0	1	1	FALSE	LILRB2	-0.907907	0.000242704	0	0.32	0.0083	chr19_54276184_54281924|LILRB2	HypoDown	Replicated
chr19_54309864_54313005	-0.294074	0	0	0	0	FALSE	LILRA5	-2.05675	2.33388e-11	-134	0.55	2e-06	chr19_54309864_54313005|LILRA5	HypoDown	Type I failure
chr19_54335441_54338651	-0.308505	6.06061e-09	0	0	0	FALSE	LILRA4	-0.902827	0.0281757	-499	0.44	0.00026	chr19_54335441_54338651|LILRA4	HypoDown	Replicated
chr19_54571079_54573081	-0.285279	0	0	0	0	FALSE	LILRA2	-1.88569	1.30453e-11	0	0.49	4.2e-05	chr19_54571079_54573081|LILRA2	HypoDown	Replicated
chr19_54573793_54577202	-0.318198	0	0	0	0	FALSE	LILRA2	-1.88569	1.30453e-11	873	0.54	4.5e-06	chr19_54573793_54577202|LILRA2	HypoDown	Replicated
chr19_55333071_55334624	-0.293991	0	2	0	2	FALSE	TMEM150B	2.06318	3.95605e-14	0	-0.59	3.2e-07	chr19_55333071_55334624|TMEM150B	HypoUp	Type I failure
chr2_42492538_42493728	0.366923	0	0	1	1	TRUE	MTA3	0.880334	1.4799e-18	-841	0.74	0	chr2_42492538_42493728|MTA3	HyperUp	Replicated
chr2_215311040_215311564	-0.263475	5.45455e-08	1	0	1	FALSE	ATIC	0.890587	3.57653e-10	-253	-0.59	2.8e-07	chr2_215311040_215311564|ATIC	HypoUp	Type I failure
chr20_33672692_33673400	-0.337632	0	1	1	2	FALSE	NECAB3	1.52702	7.45723e-15	-1063	-0.75	0	chr20_33672692_33673400|NECAB3	HypoUp	Replicated
chr20_59122372_59124188	-0.307603	4.84848e-08	1	0	1	FALSE	ZNF831	-1.03506	0.00231204	0	0.45	0.0002	chr20_59122372_59124188|ZNF831	HypoDown	Type I failure
chr22_45286491_45287226	-0.300115	0	1	0	1	FALSE	UPK3A	5.85846	7.58006e-28	1509	-0.39	0.0012	chr22_45286491_45287226|UPK3A	HypoUp	Type I failure
chr3_8744194_8747925	-0.344276	6.06061e-09	0	0	0	FALSE	SSUH2	3.45753	1.77045e-12	0	-0.32	0.0094	chr3_8744194_8747925|SSUH2	HypoUp	Type II failure
chr3_48661136_48662639	0.286603	2.42424e-08	1	1	2	TRUE	CELSR3	3.09269	1.49026e-23	-276	0.64	4.2e-08	chr3_48661136_48662639|CELSR3	HyperUp	Replicated
chr3_48661136_48662639.1	0.286603	2.42424e-08	1	1	2	TRUE	LINC02585	2.56438	1.29677e-08	-1137	0.61	1.2e-07	chr3_48661136_48662639|LINC02585	HyperUp	Type II failure
chr4_39366776_39367630	-0.231687	4.84848e-08	2	1	3	FALSE	RFC1	0.625628	3.20729e-09	401	-0.63	2.9e-08	chr4_39366776_39367630|RFC1	HypoUp	Replicated
chr5_170299159_170300090	-0.34176	3.63636e-08	1	0	1	FALSE	LCP2	-0.802499	0.00276195	932	0.42	0.00054	chr5_170299159_170300090|LCP2	HypoDown	Type I failure
chr6_25993346_25993675	-0.29139	0	0	1	1	FALSE	U91328.1	1.32013	6.78348e-11	684	-0.62	4.7e-08	chr6_25993346_25993675|U91328.1	HypoUp	Type I failure
chr6_29558152_29558925	-0.419907	0	2	0	2	FALSE	UBD	3.58957	5.08112e-11	-1000	-0.47	8.6e-05	chr6_29558152_29558925|UBD	HypoUp	Type I failure
chr7_28956944_28958842	0.378022	0	0	1	1	TRUE	TRIL	1.21757	3.32165e-07	0	0.55	2.3e-06	chr7_28956944_28958842|TRIL	HyperUp	Replicated
chr7_64867939_64871517	-0.351966	6.06061e-09	0	0	0	TRUE	ZNF273	0.815287	5.15409e-08	0	-0.41	0.00059	chr7_64867939_64871517|ZNF273	HypoUp	Type II failure
chr7_93918985_93920203	-0.282535	6.06061e-08	1	0	1	FALSE	GNG11	-0.954189	2.39843e-05	-1496	0.33	0.007	chr7_93918985_93920203|GNG11	HypoDown	Type I failure
chr7_100269649_100270568	-0.298212	0	1	0	1	FALSE	CASTOR3	1.33619	3.01583e-12	-1664	-0.65	4.3e-09	chr7_100269649_100270568|CASTOR3	HypoUp	Type II failure
chr7_101236799_101238324	-0.292747	0	0	1	1	FALSE	CLDN15	1.87643	7.80691e-13	-496	-0.83	0	chr7_101236799_101238324|CLDN15	HypoUp	Replicated
chr7_135746960_135749495	-0.292139	2.42424e-08	0	1	1	FALSE	FAM180A	-2.84896	7.66168e-10	0	0.66	1.7e-09	chr7_135746960_135749495|FAM180A	HypoDown	Replicated
chr7_153409385_153414141	-0.315548	0	0	0	0	TRUE	LINC01287	8.83494	5.13576e-27	0	-0.53	7.7e-06	chr7_153409385_153414141|LINC01287	HypoUp	Type I failure
chr8_11108373_11111454.1	-0.378986	0	0	0	0	FALSE	AF131215.6	-0.823781	0.0258538	1669	0.42	0.00084	chr8_11108373_11111454|AF131215.6	HypoDown	Type II failure
chr8_75323566_75324711	-0.319973	0	1	0	1	TRUE	CASC9	3.54111	1.42238e-07	-30	-0.59	2.2e-07	chr8_75323566_75324711|CASC9	HypoUp	Type I failure
chr8_143290050_143290672	-0.254073	0	1	0	1	TRUE	AC138696.2	0.712291	0.00717861	0	-0.65	1.5e-08	chr8_143290050_143290672|AC138696.2	HypoUp	Type II failure
chr8_143290050_143290672.1	-0.254073	0	1	0	1	TRUE	ZNF696	1.17791	3.2632e-17	374	-0.74	0	chr8_143290050_143290672|ZNF696	HypoUp	Replicated
chr8_144797361_144797933	-0.301134	0	0	1	1	FALSE	ZNF517	1.22287	1.39893e-10	-943	-0.68	0	chr8_144797361_144797933|ZNF517	HypoUp	Type I failure
chr1_9589712_9590461	-0.216769	5.45455e-08	1	1	2	FALSE	TMEM201	1.45678	5.48517e-20	790	-0.65	7.7e-09	chr1_9589712_9590461|TMEM201	HypoUp	Type I failure
chr1_37990529_37991055	-0.168867	2.06061e-07	0	1	1	FALSE	SF3A3	0.552065	3.52654e-10	0	-0.5	4.4e-05	chr1_37990529_37991055|SF3A3	HypoUp	Type II failure
chr1_43359350_43360396	-0.155718	0	1	0	1	TRUE	CDC20	4.17803	7.19654e-53	395	-0.65	1.4e-08	chr1_43359350_43360396|CDC20	HypoUp	Replicated
chr1_115978319_115979012	-0.250644	1.81818e-08	0	1	1	FALSE	SLC22A15	2.45664	8.11855e-12	1821	-0.53	8.2e-06	chr1_115978319_115979012|SLC22A15	HypoUp	Replicated
chr1_146050700_146051618.1	-0.215691	3.57576e-07	1	0	1	FALSE	LINC01719	1.86906	4.12624e-17	-948	-0.53	1.7e-05	chr1_146050700_146051618|LINC01719	HypoUp	Type I failure
chr1_147170665_147171303	-0.214454	1.81818e-08	1	0	1	FALSE	PRKAB2	0.633993	0.00252204	-1247	-0.64	5.1e-08	chr1_147170665_147171303|PRKAB2	HypoUp	Type I failure
chr1_147170665_147171303.1	-0.214454	1.81818e-08	1	0	1	FALSE	PDIA3P1	0.988339	5.16451e-12	-1441	-0.62	1.8e-07	chr1_147170665_147171303|PDIA3P1	HypoUp	Type I failure
chr1_147173338_147174188	-0.171786	4.84848e-07	0	1	1	FALSE	PDIA3P1	0.988339	5.16451e-12	594	-0.55	6.6e-06	chr1_147173338_147174188|PDIA3P1	HypoUp	Type I failure
chr1_150971760_150972158	-0.178471	9.69697e-08	1	2	3	FALSE	AL590133.1	0.630642	0.0455632	-965	-0.41	0.00066	chr1_150971760_150972158|AL590133.1	HypoUp	Type II failure
chr1_151839083_151840248	0.331519	1.33333e-07	1	2	3	TRUE	C2CD4D	2.06376	6.31636e-14	-309	0.59	6e-07	chr1_151839083_151840248|C2CD4D	HyperUp	Type II failure
chr1_151839083_151840248.1	0.331519	1.33333e-07	1	2	3	TRUE	AL450992.2	1.27021	0.0101732	-1629	0.59	8.4e-07	chr1_151839083_151840248|AL450992.2	HyperUp	Type II failure
chr1_153376295_153377013	-0.294844	2.24242e-07	0	1	1	FALSE	S100A12	-3.13699	3.92364e-13	646	0.52	7.2e-06	chr1_153376295_153377013|S100A12	HypoDown	Type I failure
chr1_202010439_202011198	-0.264865	1.27273e-07	1	1	2	FALSE	ELF3-AS1	1.59089	1.89703e-10	0	-0.47	0.00017	chr1_202010439_202011198|ELF3-AS1	HypoUp	Type II failure
chr1_229270341_229270847	-0.181843	3.63636e-07	1	3	4	TRUE	AL162595.1	1.12691	2.41875e-14	-181	-0.61	2.6e-07	chr1_229270341_229270847|AL162595.1	HypoUp	Type II failure
chr1_235505820_235506081	-0.210036	5.45455e-08	1	0	1	FALSE	B3GALNT2	0.979307	2.69031e-15	1339	-0.68	0	chr1_235505820_235506081|B3GALNT2	HypoUp	Type I failure
chr10_17809401_17810561	-0.26733	3.0303e-07	0	1	1	FALSE	MRC1	-1.64329	8.26588e-08	57	0.33	0.0075	chr10_17809401_17810561|MRC1	HypoDown	Type I failure
chr10_44960323_44960738	-0.17309	4.19394e-06	0	1	1	FALSE	RASSF4	1.08936	1.16819e-14	916	-0.51	4e-05	chr10_44960323_44960738|RASSF4	HypoUp	Type I failure
chr10_77924791_77925773	-0.205139	6.30303e-07	1	0	1	FALSE	DLG5	1.88845	2.63314e-24	-753	-0.56	4e-06	chr10_77924791_77925773|DLG5	HypoUp	Replicated
chr10_77924791_77925773.1	-0.205139	6.30303e-07	1	0	1	FALSE	DLG5-AS1	2.4641	1.01132e-15	-1599	-0.58	1.2e-06	chr10_77924791_77925773|DLG5-AS1	HypoUp	Type II failure
chr10_103367134_103367654	-0.220814	0	1	0	1	FALSE	TAF5	0.521616	5.32058e-05	-313	-0.65	5.1e-09	chr10_103367134_103367654|TAF5	HypoUp	Type I failure
chr11_315935_317012	0.263066	3.27273e-07	1	2	3	TRUE	AC136475.1	0.591149	0.0316155	-1628	0.32	0.0082	chr11_315935_317012|AC136475.1	HyperUp	Type II failure
chr11_34622852_34624552	0.220852	6.06061e-09	0	1	1	FALSE	EHF	1.7813	4.14125e-06	1759	0.45	0.00018	chr11_34622852_34624552|EHF	HyperUp	Type I failure
chr12_2877946_2878599.1	-0.151114	3.63636e-07	1	1	2	FALSE	FOXM1	3.66025	6.23014e-42	791	-0.54	1.4e-05	chr12_2877946_2878599|FOXM1	HypoUp	Type I failure
chr12_2877946_2878599.2	-0.151114	3.63636e-07	1	1	2	FALSE	RHNO1	1.03885	3.10923e-14	1688	-0.58	2.2e-06	chr12_2877946_2878599|RHNO1	HypoUp	Type I failure
chr12_64759871_64760750	-0.211877	6.06061e-09	0	2	2	FALSE	GNS	1.09207	3.68432e-11	424	-0.52	8.6e-06	chr12_64759871_64760750|GNS	HypoUp	Type II failure
chr12_94150703_94151928	-0.191131	2.42424e-08	1	2	3	TRUE	PLXNC1	1.98147	7.26345e-14	1980	-0.5	2.2e-05	chr12_94150703_94151928|PLXNC1	HypoUp	Type I failure
chr12_94647536_94649341	-0.170786	1.27273e-07	1	0	1	FALSE	TMCC3	0.924457	2.56861e-06	-1221	-0.52	1.3e-05	chr12_94647536_94649341|TMCC3	HypoUp	Type II failure
chr12_109714923_109715630	-0.176458	6.06061e-09	0	1	1	TRUE	FAM222A	2.02366	2.08183e-18	695	-0.59	3.5e-07	chr12_109714923_109715630|FAM222A	HypoUp	Type I failure
chr12_121711515_121711878	-0.15933	5.15152e-07	1	0	1	FALSE	TMEM120B	0.593435	0.000908678	-874	-0.53	5.3e-06	chr12_121711515_121711878|TMEM120B	HypoUp	Type I failure
chr13_57632639_57634795	0.22944	1.27273e-07	0	1	1	TRUE	PCDH17	0.973803	1.84965e-05	829	0.57	9.1e-07	chr13_57632639_57634795|PCDH17	HyperUp	Type II failure
chr13_100088021_100088317	-0.267426	9.69697e-07	1	0	1	FALSE	AL355338.1	4.08935	5.20863e-10	-531	-0.42	0.001	chr13_100088021_100088317|AL355338.1	HypoUp	Type I failure
chr14_23954913_23955192	0.216212	5.0303e-07	0	1	1	FALSE	DHRS4	-0.855517	2.8952e-06	1327	-0.4	0.00086	chr14_23954913_23955192|DHRS4	HyperDown	Type I failure
chr14_55191968_55192313	-0.185883	4.24242e-08	0	1	1	FALSE	DLGAP5	4.01926	4.5858e-49	290	-0.66	2.9e-09	chr14_55191968_55192313|DLGAP5	HypoUp	Type I failure
chr14_95709758_95712941	-0.269823	2.42424e-07	0	0	0	FALSE	TCL1A	-1.6873	0.000652993	-1255	0.37	0.0026	chr14_95709758_95712941|TCL1A	HypoDown	Replicated
chr15_48332528_48333063.1	-0.211496	3.39394e-07	0	1	1	FALSE	DUT	0.74595	1.72184e-06	1517	-0.56	2.8e-06	chr15_48332528_48333063|DUT	HypoUp	Replicated
chr15_52294443_52294975	-0.17116	6.06061e-08	1	0	1	FALSE	MYO5C	1.30733	6.36674e-19	-823	-0.67	0	chr15_52294443_52294975|MYO5C	HypoUp	Replicated
chr15_90929153_90929733	-0.192594	2.42424e-08	0	1	1	FALSE	UNC45A	0.695498	3.2506e-11	-447	-0.53	6.1e-06	chr15_90929153_90929733|UNC45A	HypoUp	Type I failure
chr15_90956517_90957160	0.334292	1.85455e-06	0	1	1	TRUE	RCCD1	0.714934	8.55681e-12	1647	0.48	6.4e-05	chr15_90956517_90957160|RCCD1	HyperUp	Replicated
chr16_1147671_1151259	-0.217977	2.12121e-07	0	0	0	TRUE	CACNA1H	-1.34017	0.00106961	-1862	0.57	8.5e-07	chr16_1147671_1151259|CACNA1H	HypoDown	Replicated
chr17_19386011_19386370	-0.213166	1.24242e-06	0	1	1	FALSE	MFAP4	-1.40543	0.00431337	-870	0.37	0.0022	chr17_19386011_19386370|MFAP4	HypoDown	Type I failure
chr17_45371127_45371613	-0.249648	4.30303e-07	0	1	1	FALSE	AC003070.2	1.10942	0.0105852	-444	-0.59	2.3e-07	chr17_45371127_45371613|AC003070.2	HypoUp	Type I failure
chr17_60079442_60079920	-0.209905	3.15152e-07	1	0	1	FALSE	HEATR6	0.798684	3.46112e-14	511	-0.43	0.0008	chr17_60079442_60079920|HEATR6	HypoUp	Replicated
chr17_77088122_77088452	-0.168369	6.54545e-07	0	1	1	FALSE	SNHG20	0.565842	0.0028934	1406	-0.38	0.004	chr17_77088122_77088452|SNHG20	HypoUp	Type I failure
chr18_21598961_21599372	-0.217696	1.0303e-07	1	0	1	FALSE	ESCO1	0.599216	1.64751e-07	-1512	-0.54	4.3e-06	chr18_21598961_21599372|ESCO1	HypoUp	Type I failure
chr19_11155001_11155361	-0.232248	0	0	1	1	FALSE	SPC24	3.15203	4.09748e-41	-447	-0.66	5.2e-10	chr19_11155001_11155361|SPC24	HypoUp	Replicated
chr19_20564513_20564754	-0.263103	6.66667e-08	0	1	1	FALSE	ZNF737	0.649433	0.00684013	-1055	-0.41	0.00077	chr19_20564513_20564754|ZNF737	HypoUp	Type I failure
chr19_28606496_28607360	-0.251337	6.06061e-08	1	0	1	FALSE	AC079466.1	9.26409	9.5225e-33	0	-0.58	6.3e-07	chr19_28606496_28607360|AC079466.1	HypoUp	Type I failure
chr19_32676028_32676972	0.318905	4.30303e-07	0	1	1	TRUE	ANKRD27	1.18488	6.14125e-21	0	0.49	4.6e-05	chr19_32676028_32676972|ANKRD27	HyperUp	Replicated
chr19_53504542_53505577	-0.221247	2.42424e-08	0	1	1	FALSE	AC011487.1	1.43655	0.00303983	1150	-0.42	0.00046	chr19_53504542_53505577|AC011487.1	HypoUp	Type I failure
chr19_58574060_58574984	-0.212968	2.42424e-08	0	1	1	FALSE	CENPBD1P1	0.519962	0.000474448	557	-0.38	0.0034	chr19_58574060_58574984|CENPBD1P1	HypoUp	Type II failure
chr2_26171622_26172795	0.201834	2.42424e-08	0	1	1	TRUE	GAREM2	2.21293	1.45176e-12	-296	0.39	0.0012	chr2_26171622_26172795|GAREM2	HyperUp	Type II failure
chr2_61145329_61145718	-0.186337	1.4e-06	0	1	1	FALSE	C2orf74	-0.534672	0.00139845	261	-0.37	0.0042	chr2_61145329_61145718|C2orf74	HypoUp	Type I failure
chr2_73213015_73213953	-0.178515	6.66667e-08	1	1	2	FALSE	SMYD5	0.582603	2.50516e-08	-269	-0.55	3.1e-06	chr2_73213015_73213953|SMYD5	HypoUp	Replicated
chr2_170716262_170717329	0.32034	1.15152e-07	1	1	2	TRUE	SP5	2.20312	1.39721e-11	911	0.46	0.00026	chr2_170716262_170717329|SP5	HyperUp	Replicated
chr2_170716262_170717329.1	0.32034	1.15152e-07	1	1	2	TRUE	LINC01124	1.46248	1.35949e-05	1695	0.53	1.2e-05	chr2_170716262_170717329|LINC01124	HyperUp	Type II failure
chr2_202264667_202265192	-0.162738	2.42424e-07	1	0	1	FALSE	NOP58	0.752151	1.632e-08	-524	-0.42	0.00051	chr2_202264667_202265192|NOP58	HypoUp	Type I failure
chr2_218293324_218294045	-0.195422	6.66667e-08	1	0	1	FALSE	TMBIM1	0.502379	5.5337e-05	738	-0.57	1.2e-06	chr2_218293324_218294045|TMBIM1	HypoUp	Type I failure
chr20_25622270_25623055	-0.215182	6.06061e-09	2	1	3	FALSE	ZNF337-AS1	1.24118	3.0439e-13	-990	-0.68	0	chr20_25622270_25623055|ZNF337-AS1	HypoUp	Type I failure
chr20_30377525_30378015	-0.163842	4.35152e-06	2	0	2	TRUE	FRG1BP	0.726913	1.8655e-05	153	-0.51	1.7e-05	chr20_30377525_30378015|FRG1BP	HypoUp	Type I failure
chr20_38445542_38446265	-0.178822	2.42424e-08	1	0	1	FALSE	SNHG11	0.583695	0.0102916	-313	-0.43	0.00031	chr20_38445542_38446265|SNHG11	HypoUp	Replicated
chr22_45285335_45286197	-0.226757	3.27273e-07	1	0	1	FALSE	UPK3A	5.85846	7.58006e-28	353	-0.39	0.0013	chr22_45285335_45286197|UPK3A	HypoUp	Type I failure
chr3_9750612_9751152	-0.174129	6.06061e-08	1	2	3	FALSE	OGG1	0.899649	3.40493e-08	668	-0.59	4.2e-07	chr3_9750612_9751152|OGG1	HypoUp	Type I failure
chr4_1710907_1711321	-0.166207	5.15152e-06	0	2	2	TRUE	SLBP	0.650388	8.73602e-10	-1234	-0.6	4.4e-07	chr4_1710907_1711321|SLBP	HypoUp	Type I failure
chr4_1872637_1873084	-0.184441	4.12121e-07	1	0	1	FALSE	NSD2	1.12961	4.51808e-17	1213	-0.63	4.2e-08	chr4_1872637_1873084|NSD2	HypoUp	Type I failure
chr4_31996088_31996605	-0.33469	4.12121e-07	0	1	1	TRUE	LINC02506	3.05623	0.00138279	-792	-0.47	6e-05	chr4_31996088_31996605|LINC02506	HypoUp	Type I failure
chr4_140428073_140428346	-0.161514	1.21212e-08	1	0	1	FALSE	CLGN	2.88262	7.10825e-12	105	-0.54	3.8e-06	chr4_140428073_140428346|CLGN	HypoUp	Type I failure
chr5_613786_614143	-0.241933	0	0	1	1	FALSE	CEP72	1.19686	5.30014e-13	1514	-0.55	2.8e-06	chr5_613786_614143|CEP72	HypoUp	Type I failure
chr5_177304722_177305183	-0.192951	2.72727e-07	0	1	1	FALSE	PRELID1	0.557889	8.92508e-06	948	-0.7	0	chr5_177304722_177305183|PRELID1	HypoUp	Replicated
chr5_177598552_177599418	-0.200287	1.51515e-07	1	0	1	FALSE	B4GALT7	0.632803	1.15067e-08	-682	-0.54	4.8e-06	chr5_177598552_177599418|B4GALT7	HypoUp	Type I failure
chr5_177950646_177952359	-0.292745	1.27273e-07	0	0	0	FALSE	AC106795.2	-1.56198	5.02884e-05	311	0.59	3.7e-07	chr5_177950646_177952359|AC106795.2	HypoDown	Type II failure
chr6_10418679_10419484	0.22258	1.81818e-08	0	1	1	TRUE	TFAP2A	2.39205	1.97868e-07	-175	0.47	6.9e-05	chr6_10418679_10419484|TFAP2A	HyperUp	Replicated
chr6_24776222_24776674	-0.182768	2.42424e-07	1	0	1	FALSE	GMNN	1.86941	2.15234e-24	1291	-0.5	2e-05	chr6_24776222_24776674|GMNN	HypoUp	Type I failure
chr6_41040146_41040775	-0.208633	1.81818e-08	1	1	2	FALSE	TSPO2	2.46136	3.19483e-10	-1779	-0.61	1.1e-07	chr6_41040146_41040775|TSPO2	HypoUp	Type I failure
chr6_44219937_44220326	-0.267704	0	1	0	1	FALSE	SLC29A1	1.15436	4.68146e-08	432	-0.66	2.2e-09	chr6_44219937_44220326|SLC29A1	HypoUp	Replicated
chr6_116764755_116765106	0.214469	7.21212e-07	0	1	1	TRUE	FAM162B	1.01684	0.000205689	-617	0.48	6.5e-05	chr6_116764755_116765106|FAM162B	HyperUp	Type II failure
chr6_133889000_133890152	0.189007	5.45455e-08	0	3	3	TRUE	TCF21	-1.81354	1.13001e-06	0	-0.39	0.0015	chr6_133889000_133890152|TCF21	HyperDown	Replicated
chr7_1570878_1571511	-0.243272	1.27273e-07	1	0	1	FALSE	PSMG3	0.715193	4.75208e-06	0	-0.59	6e-07	chr7_1570878_1571511|PSMG3	HypoUp	Replicated
chr7_6349239_6349773	-0.220079	0	2	0	2	FALSE	FAM220A	0.961351	2.47282e-20	258	-0.63	3e-08	chr7_6349239_6349773|FAM220A	HypoUp	Type II failure
chr7_15561580_15562360	-0.15023	7.87879e-08	0	3	3	FALSE	AGMO	-0.516236	0.0467047	0	-0.38	0.0017	chr7_15561580_15562360|AGMO	HypoUp	Type II failure
chr7_74966513_74967311	-0.438264	3.15152e-07	1	0	1	FALSE	CASTOR2	1.41685	1.78424e-10	1695	-0.51	1.7e-05	chr7_74966513_74967311|CASTOR2	HypoUp	Type I failure
chr7_81769899_81771133	-0.158943	5.69697e-07	0	2	2	FALSE	HGF	-2.55103	1.08269e-16	0	0.47	6.9e-05	chr7_81769899_81771133|HGF	HypoDown	Replicated
chr7_100125539_100126446	-0.207612	3.0303e-08	1	0	1	FALSE	MBLAC1	0.768844	6.16005e-05	-248	-0.6	3.2e-07	chr7_100125539_100126446|MBLAC1	HypoUp	Replicated
chr7_100125539_100126446.1	-0.207612	3.0303e-08	1	0	1	FALSE	AC073842.2	1.60652	1.80481e-05	-693	-0.45	0.00028	chr7_100125539_100126446|AC073842.2	HypoUp	Type II failure
chr8_65634940_65635952	-0.229282	6.66667e-08	1	3	4	FALSE	ARMC1	0.616087	3.06308e-05	723	-0.59	2.8e-07	chr8_65634940_65635952|ARMC1	HypoUp	Type I failure
chr8_143280873_143281404	-0.187005	0	1	1	2	FALSE	MINCR	0.838532	0.00282461	-286	-0.5	2.8e-05	chr8_143280873_143281404|MINCR	HypoUp	Type I failure
chr8_144429377_144429784	-0.150665	1.21212e-06	1	2	3	TRUE	VPS28	0.532643	9.78998e-05	814	-0.52	1e-05	chr8_144429377_144429784|VPS28	HypoUp	Replicated
chr8_144799666_144800115	-0.236019	1.21212e-07	0	1	1	FALSE	ZNF517	1.22287	1.39893e-10	790	-0.63	3.4e-08	chr8_144799666_144800115|ZNF517	HypoUp	Type I failure
chr9_83537286_83537561	0.207094	5.0303e-07	0	1	1	TRUE	FRMD3	1.35473	9.94617e-06	-985	0.36	0.0032	chr9_83537286_83537561|FRMD3	HyperUp	Type II failure
chrX_133987205_133987743	-0.242295	7.39394e-07	1	0	1	FALSE	GPC3	6.2042	1.17106e-49	1310	-0.66	1.3e-09	chrX_133987205_133987743|GPC3	HypoUp	Type I failure

## Sheet: Table S2.1.3
Table S2.1.3 Summarized information of genic enhancer-like DMR-DEGs
DMR.ID	Delta.Methy	DM.Pvalue	EnhancerLike.T	EnhancerLike.N	EnhancerLike.score	gene_name	DEG.LFC	DEG.padj	distance	MethyandGene.rho	MethyandGene.padj
chr16_2015171_2015732	-0.207926	0	0	1	1	NTHL1	-0.778022	0.0004467	-32134	0.53	0.00014
chr5_95815632_95815978	0.180711	0	0	3	3	LINC01554	-1.73493	0.00745778	-36254	-0.4	0.0051
chr12_56479783_56479864	0.261325	0	0	3	3	MIP	-2.47773	8.98285e-10	10617	-0.51	8.4e-05
chr12_95198881_95199232	-0.255424	6.66667e-08	2	4	6	FGD6	0.797887	3.79774e-06	-18250	-0.51	3.6e-05
chr13_110206078_110206748	-0.308316	3.0303e-08	0	1	1	COL4A2	1.84134	2.14942e-10	-99064	-0.43	0.00037
chr13_110213615_110215433	-0.313235	6.06061e-08	0	1	1	COL4A2	1.84134	2.14942e-10	-90379	-0.35	0.0094
chr13_110217169_110217704	-0.257319	4.84848e-08	0	1	1	COL4A2	1.84134	2.14942e-10	-88108	-0.35	0.0084
chr13_110229410_110231662	-0.350406	5.45455e-08	0	1	1	COL4A2	1.84134	2.14942e-10	-74150	-0.44	0.0005
chr13_110235017_110235637	-0.392187	5.45455e-08	0	1	1	COL4A2	1.84134	2.14942e-10	-70175	-0.35	0.0076
chr13_110236441_110236740	-0.308391	0	0	1	1	COL4A2	1.84134	2.14942e-10	-69072	-0.39	0.0026
chr13_110242603_110244211	-0.355457	6.06061e-09	0	1	1	COL4A2	1.84134	2.14942e-10	-61601	-0.36	0.0056
chr13_110248506_110249705	-0.342238	0	0	2	2	COL4A2	1.84134	2.14942e-10	-56107	-0.48	0.00013
chr13_110250375_110252498	-0.280026	4.24242e-08	0	1	1	COL4A2	1.84134	2.14942e-10	-53314	-0.47	0.00015
chr13_110258211_110258454	-0.397611	6.06061e-08	0	1	1	COL4A2	1.84134	2.14942e-10	-47358	-0.4	0.0022
chr13_110258981_110260929	-0.320177	4.24242e-08	1	1	2	COL4A2	1.84134	2.14942e-10	-44883	-0.41	0.0013
chr13_110278775_110279365	-0.388597	0	0	1	1	COL4A2	1.84134	2.14942e-10	-26447	-0.38	0.0036
chr13_110280471_110281294	-0.318098	6.06061e-09	0	1	1	COL4A2	1.84134	2.14942e-10	-24518	-0.41	0.0016
chr13_110283890_110284088	-0.316137	3.63636e-08	0	1	1	COL4A2	1.84134	2.14942e-10	-21724	-0.35	0.0074
chr13_110285551_110286969	-0.337102	6.06061e-09	0	2	2	COL4A2	1.84134	2.14942e-10	-18843	-0.42	0.0011
chr13_110288723_110292108	-0.358369	6.06061e-09	0	1	1	COL4A2	1.84134	2.14942e-10	-13704	-0.4	0.0018
chr13_110295281_110296570	-0.359077	0	0	1	1	COL4A2	1.84134	2.14942e-10	-9242	-0.46	0.00028
chr13_110297040_110297421	-0.338307	0	0	2	2	COL4A2	1.84134	2.14942e-10	-8391	-0.37	0.0044
chr13_110301038_110302613	-0.348298	6.06061e-08	0	3	3	COL4A2	1.84134	2.14942e-10	-3199	-0.38	0.0036
chr13_110317065_110318754	-0.377338	0	0	1	1	COL4A2	1.84134	2.14942e-10	11253	-0.44	0.00058
chr13_110318961_110319241	-0.373395	0	0	1	1	COL4A2	1.84134	2.14942e-10	13149	-0.44	0.00048
chr13_110319533_110319799	-0.324801	1.81818e-08	0	1	1	COL4A2	1.84134	2.14942e-10	13721	-0.36	0.006
chr13_110329037_110329481	-0.342451	0	0	1	1	COL4A2	1.84134	2.14942e-10	23225	-0.35	0.0094
chr13_110334826_110335482	-0.330885	3.0303e-08	0	1	1	COL4A2	1.84134	2.14942e-10	29014	-0.41	0.0013
chr13_110339107_110339490	-0.302264	3.0303e-08	0	1	1	COL4A2	1.84134	2.14942e-10	33295	-0.36	0.007
chr13_110340203_110340362	-0.388396	0	0	2	2	COL4A2	1.84134	2.14942e-10	34391	-0.39	0.003
chr13_110342449_110343420	-0.347553	0	0	1	1	COL4A2	1.84134	2.14942e-10	36637	-0.38	0.004
chr13_110349284_110349462	-0.368968	6.06061e-09	0	1	1	COL4A2	1.84134	2.14942e-10	43472	-0.35	0.0074
chr13_110353226_110354476	-0.36771	0	0	1	1	COL4A2	1.84134	2.14942e-10	47414	-0.38	0.0036
chr13_110361203_110362376	-0.289501	9.69697e-08	0	1	1	COL4A2	1.84134	2.14942e-10	55391	-0.45	0.0004
chr13_110371682_110371979	-0.362887	6.06061e-09	1	1	2	COL4A2	1.84134	2.14942e-10	65870	-0.41	0.0015
chr13_110373681_110374329	-0.408813	0	0	1	1	COL4A2	1.84134	2.14942e-10	67869	-0.4	0.0017
chr13_110375121_110375894	-0.38029	0	0	1	1	COL4A2	1.84134	2.14942e-10	69309	-0.42	0.00088
chr13_110395005_110396732	-0.358922	6.06061e-09	1	1	2	COL4A2	1.84134	2.14942e-10	89193	-0.51	3.6e-05
chr13_110398304_110398647	-0.350786	0	0	2	2	COL4A2	1.84134	2.14942e-10	92492	-0.49	7.2e-05
chr15_52134692_52134984	-0.255896	6.06061e-09	3	5	8	GNB5	0.644607	1.0614e-06	-56385	-0.51	6e-05
chr15_52136348_52136671	-0.25895	6.66667e-08	2	4	6	GNB5	0.644607	1.0614e-06	-54698	-0.67	0
chr15_67126882_67127236	-0.228587	6.06061e-09	1	4	5	SMAD3	0.54645	0.000980765	63119	-0.4	0.0017
chr15_67148220_67148577	-0.246056	8.48485e-08	3	5	8	SMAD3	0.54645	0.000980765	84457	-0.39	0.0024
chr17_27830108_27830555	-0.311595	0	2	3	5	NOS2	2.03598	2.79172e-09	29609	-0.53	1.4e-05
chr19_3423245_3424523	0.300959	0	0	4	4	SMIM24	-2.4667	8.18585e-06	-56019	-0.39	0.0048
chr20_309966_310844	0.311919	0	1	2	3	SOX12	1.35238	2.97753e-12	-14751	0.66	6.3e-09
chr20_309966_310844	0.311919	0	1	2	3	TRIB3	0.991599	6.34168e-05	-51991	0.48	0.00054
chr20_31676006_31676204	0.301411	0	1	5	6	ID1	-2.9549	2.36887e-26	70723	-0.63	1.2e-07
chr5_151251276_151251871	-0.25858	0	1	2	3	GM2A	0.925241	5.37575e-13	39126	-0.47	0.00028
chr6_73703922_73704476	-0.299035	0	2	1	3	CD109	3.51113	4.70826e-26	8137	-0.49	8.8e-05
chr8_96589537_96590620	-0.239121	0	2	5	7	SDC2	0.510005	0.00542679	96186	-0.65	1.3e-08
chr9_107487443_107488282	0.352852	4.24242e-08	1	0	1	KLF4	-1.19513	2.09739e-05	-2200	-0.32	0.008
chrX_153966380_153966900	0.290841	6.06061e-08	0	1	1	IRAK1	1.29155	6.79998e-14	-53080	0.51	0.00012
chr1_19202791_19203073	-0.168366	1.57576e-07	1	3	4	EMC1	0.555364	0.000525924	-48479	-0.48	0.00038
chr1_24100881_24101396	-0.237111	0	0	1	1	IL22RA1	1.39676	7.07447e-07	-41725	-0.45	0.00048
chr1_26284867_26285814	-0.206129	1.51515e-07	1	5	6	CEP85	1.00785	3.63492e-09	50667	-0.6	1.5e-06
chr1_28860029_28860343	-0.17883	8.30303e-07	0	1	1	EPB41	0.501727	0.00391544	-26748	-0.52	1.2e-05
chr1_89177359_89177535	-0.167178	6.66667e-08	2	2	4	GBP2	1.59937	1.5776e-08	26903	-0.39	0.0084
chr1_145893412_145893615	-0.16471	0	1	1	2	ANKRD34A	0.626986	0.0119458	-70967	-0.42	0.0075
chr1_151729373_151729913	-0.22504	2.28485e-06	1	0	1	TDRKH	1.83964	3.2846e-36	-61503	-0.43	0.0022
chr1_155300866_155301173	-0.215616	9.09091e-07	2	3	5	GBAP1	1.52816	7.21659e-10	73444	-0.45	0.0027
chr1_204253975_204254364	-0.183603	6.06061e-09	3	3	6	REN	3.07705	2.24238e-10	63651	-0.48	0.00016
chr10_45997441_45997849	-0.1514	2e-07	1	0	1	MSMB	2.47503	4.75134e-06	-48420	-0.44	0.00076
chr11_10325582_10325952	-0.172539	7.57576e-07	2	3	5	AMPD3	0.855926	0.00193636	17269	-0.5	6.3e-05
chr11_61695872_61696045	0.290985	4.24242e-07	0	3	3	FEN1	1.92396	1.24989e-34	-96592	0.53	2.6e-05
chr11_65844344_65844737	-0.219561	0	2	0	2	FIBP	0.579343	9.39705e-09	-43802	-0.64	2e-07
chr11_65880218_65880609	-0.185388	9.15152e-07	0	1	1	FIBP	0.579343	9.39705e-09	-7930	-0.52	0.00013
chr12_47767765_47768341	-0.217141	0	1	0	1	SLC48A1	0.659919	2.25118e-06	13849	-0.51	0.00013
chr12_57837050_57837639	0.15903	1.27273e-07	2	4	6	METTL1	0.576767	6.26794e-05	64257	0.44	0.0039
chr12_113206521_113206857	-0.191051	2.95758e-06	2	0	2	IQCD	1.80926	7.42758e-11	-14237	-0.5	0.00015
chr12_113239545_113239794	-0.243681	3.0303e-08	2	3	5	IQCD	1.80926	7.42758e-11	18451	-0.55	1e-05
chr12_120365232_120366088	-0.169332	4.60606e-07	0	1	1	PLA2G1B	2.36764	2.03039e-10	37443	-0.5	0.00027
chr12_121839454_121840054	0.286448	1.27273e-07	0	1	1	HPD	-1.83389	1.14238e-05	-23542	-0.43	0.003
chr13_110232653_110233057	-0.299988	2.60606e-07	1	0	1	COL4A2	1.84134	2.14942e-10	-72755	-0.38	0.004
chr13_110299251_110299803	-0.289231	1.0303e-07	0	1	1	COL4A2	1.84134	2.14942e-10	-6009	-0.39	0.0028
chr13_110310341_110312023	-0.281251	3.63636e-07	0	1	1	COL4A2	1.84134	2.14942e-10	4529	-0.37	0.0042
chr13_110329715_110330407	-0.304213	5.57576e-07	0	1	1	COL4A2	1.84134	2.14942e-10	23903	-0.38	0.0036
chr13_110332309_110332898	-0.309974	4.72727e-07	0	1	1	COL4A2	1.84134	2.14942e-10	26497	-0.41	0.0012
chr13_110336945_110337681	-0.350722	5.0303e-07	0	2	2	COL4A2	1.84134	2.14942e-10	31133	-0.37	0.0044
chr13_110341253_110341899	-0.188746	9.93939e-07	1	2	3	COL4A2	1.84134	2.14942e-10	35441	-0.37	0.0054
chr13_110376570_110377053	-0.337963	1.27273e-07	0	1	1	COL4A2	1.84134	2.14942e-10	70758	-0.35	0.0094
chr13_110386765_110387626	-0.291112	2.24242e-07	0	1	1	COL4A2	1.84134	2.14942e-10	80953	-0.39	0.0024
chr13_110387831_110390493	-0.291344	1.57576e-07	0	1	1	COL4A2	1.84134	2.14942e-10	82019	-0.38	0.0032
chr13_110397302_110398009	-0.199015	5.75758e-07	1	3	4	COL4A2	1.84134	2.14942e-10	91490	-0.39	0.0028
chr14_22965804_22966761	-0.238748	0	1	1	2	LRP10	0.636404	0.000603621	94191	-0.45	0.0025
chr14_50924824_50925195	-0.165597	6.06061e-09	0	3	3	ABHD12B	1.03836	0.00123823	52664	-0.42	0.002
chr14_72852620_72853034	-0.161929	1.27273e-07	0	1	1	DCAF4	0.641844	1.97922e-08	-73298	-0.54	7.6e-06
chr14_72860392_72860710	-0.168089	4.84848e-08	0	1	1	DCAF4	0.641844	1.97922e-08	-65622	-0.57	3.6e-06
chr14_75292446_75292754	0.155455	1.27273e-07	0	3	3	FOS	-3.23897	2.69163e-20	13672	-0.41	0.002
chr15_52133645_52134096	-0.17592	0	2	3	5	GNB5	0.644607	1.0614e-06	-57273	-0.61	5.6e-07
chr15_52137738_52137980	-0.22973	0	3	4	7	GNB5	0.644607	1.0614e-06	-53389	-0.57	4.4e-06
chr15_67046858_67047120	-0.160063	2.60606e-07	2	3	5	SMAD3	0.54645	0.000980765	-16643	-0.4	0.0025
chr15_67050365_67050558	-0.162516	6.36364e-07	2	5	7	SMAD3	0.54645	0.000980765	-13205	-0.37	0.0063
chr15_84714293_84714505	-0.150885	6.06061e-09	0	3	3	NMB	1.67798	5.96608e-22	55730	-0.59	3e-06
chr16_3274141_3274760	-0.198474	1.57576e-07	1	0	1	TIGD7	0.706016	0.000345282	-30969	-0.54	4e-05
chr16_4912580_4912826	0.16398	3.04848e-06	0	1	1	PPL	-0.88817	0.000579806	-47915	-0.45	0.00045
chr16_5040079_5040467	-0.189158	7.33333e-07	0	1	1	ALG1	0.584234	1.26037e-05	6156	-0.52	5.5e-05
chr17_41711658_41711946	-0.204814	4.30303e-07	1	0	1	KRT17	2.38651	8.63677e-07	86816	-0.36	0.0078
chr17_57344860_57345123	-0.191272	4.11515e-06	1	0	1	MSI2	0.715599	5.76432e-10	89009	-0.4	0.001
chr18_11122098_11122244	-0.222961	6.66667e-07	2	2	4	PIEZO2	1.2479	1.33199e-08	-26518	-0.33	0.0068
chr19_3399637_3400888	0.199218	6.06061e-09	0	3	3	SMIM24	-2.4667	8.18585e-06	-79654	-0.39	0.0039
chr19_3428124_3428792	0.222965	2.42424e-08	0	5	5	SMIM24	-2.4667	8.18585e-06	-51750	-0.41	0.0024
chr19_4642127_4642428	0.211527	3.0303e-08	0	1	1	SEMA6B	0.772982	0.0010557	82319	0.43	0.0018
chr2_8612496_8613017	-0.201463	1.81818e-08	1	0	1	ID2	-1.42921	5.65823e-13	-65828	0.63	1.4e-07
chr2_120238842_120239104	-0.206373	3.81818e-07	0	1	1	TMEM185B	0.727275	1.05193e-07	15434	-0.47	0.00016
chr2_219250372_219250581	-0.170079	2.84848e-07	1	2	3	TUBA4A	0.804094	7.80998e-05	-27589	-0.6	2.9e-06
chr2_233695064_233695452	-0.338832	5.42424e-06	0	3	3	UGT1A6	1.82331	1.15862e-07	3457	-0.74	0
chr2_233698385_233698596	-0.269433	4.52727e-06	1	2	3	UGT1A6	1.82331	1.15862e-07	6778	-0.68	0
chr2_233710235_233710802	-0.18678	7.69697e-07	2	1	3	UGT1A6	1.82331	1.15862e-07	18628	-0.47	0.0007
chr2_233759701_233759958	-0.152249	3.18182e-06	1	2	3	UGT1A6	1.82331	1.15862e-07	68094	-0.59	3.2e-06
chr2_235503160_235503390	0.220047	0	1	0	1	AGAP1	0.999108	1.31001e-09	9071	0.35	0.0086
chr20_25309590_25310211	-0.202103	6.60606e-07	3	4	7	ABHD12	0.75473	5.14067e-12	-80772	-0.57	5.9e-06
chr21_29092878_29093183	-0.212564	6.66667e-08	2	3	5	MAP3K7CL	0.751616	0.00117835	15407	-0.42	0.005
chr3_124858896_124859415	-0.153646	6.54545e-07	2	5	7	MUC13	6.71956	4.31959e-39	-94404	-0.52	1.7e-05
chr3_124951774_124952096	-0.153107	3.50303e-06	1	1	2	MUC13	6.71956	4.31959e-39	-1723	-0.48	0.00012
chr3_128069976_128070148	0.172603	5.75758e-07	0	1	1	RUVBL1	0.897652	7.67992e-20	-83766	0.56	5.6e-06
chr4_76013157_76013702	-0.215553	0	2	3	5	CXCL11	1.16827	0.00343216	-27713	-0.43	0.0022
chr4_165369355_165369529	-0.174345	1.07879e-06	1	1	2	CPE	1.58983	5.185e-08	8161	-0.5	4.8e-05
chr6_31831534_31831721	-0.211401	1.41818e-06	1	3	4	NEU1	1.55178	5.31698e-27	-31185	-0.52	0.00017
chr6_31831534_31831721	-0.211401	1.41818e-06	1	3	4	SLC44A4	0.923013	0.0151099	-47325	-0.5	0.00046
chr6_31834008_31834258	-0.181864	5.75758e-07	0	2	2	NEU1	1.55178	5.31698e-27	-28648	-0.46	0.0021
chr6_31865013_31865514	-0.18693	5.0303e-07	1	1	2	NEU1	1.55178	5.31698e-27	2107	-0.53	0.0001
chr6_31865013_31865514	-0.18693	5.0303e-07	1	1	2	SLC44A4	0.923013	0.0151099	-13532	-0.43	0.0059
chr6_31865013_31865514	-0.18693	5.0303e-07	1	1	2	HSPA1L	0.560953	0.00100678	49948	-0.43	0.0066
chr6_107539314_107539671	-0.157747	4.60606e-07	2	5	7	PDSS2	-0.530704	0.000171158	79750	-0.45	0.00032
chr7_76251397_76251880	-0.26598	0	1	0	1	HSPB1	1.4097	1.78854e-15	-50664	-0.64	3.4e-08
chr8_6649419_6649874	-0.22479	8.54545e-07	0	1	1	ANGPT2	1.69991	5.68469e-12	86010	-0.54	1.3e-05
chr8_18082533_18082926	-0.261895	2.06061e-07	1	0	1	NAT1	-1.24675	1.69194e-14	-87551	0.53	2e-05
chr8_22352476_22352763	-0.237669	1.43636e-06	2	2	4	PIWIL2	0.591027	0.0292789	77179	-0.42	0.0017
chr8_81034686_81035049	-0.167713	1.18182e-06	2	2	4	PAG1	0.96819	0.000272596	-77019	-0.45	0.00016
chr8_96588552_96589238	-0.18044	0	2	3	5	SDC2	0.510005	0.00542679	95201	-0.58	1.3e-06
chr8_140973057_140973499	-0.176398	1.27273e-07	2	3	5	PTK2	0.936201	9.12272e-15	-28717	-0.5	2.5e-05
chrX_154091816_154091953	0.18271	2.69091e-06	1	1	2	IRAK1	1.29155	6.79998e-14	71836	0.44	0.00054
chr1_179129962_179130312	-0.337726	0	1	4	5	ABL2	0.741218	2.51496e-09	-99372	-0.46	0.00026
chr1_223621792_223622052	-0.246587	1.81818e-08	2	4	6	CAPN8	1.36332	0.000468053	-43682	-0.41	0.0013
chr1_223621792_223622052	-0.246587	1.81818e-08	2	4	6	CAPN2	0.923044	4.16277e-07	-79541	-0.47	0.00014
chr1_226882531_226883266	0.341648	1.21212e-08	2	0	2	PSEN2	0.569632	0.0115614	12347	0.5	5e-05
chr1_229274083_229274309	-0.28783	0	3	4	7	CCSAP	1.064	5.57556e-14	-68985	-0.55	8.1e-06
chr10_5097252_5097702	-0.365805	1.21212e-08	0	3	3	AKR1C2	1.27143	0.000696552	79221	-0.48	0.00025
chr10_50056690_50057028	-0.286865	0	1	0	1	PARG	0.572045	5.95578e-10	86487	-0.63	2.1e-07
chr10_74094296_74094460	0.240267	2.42424e-08	0	1	1	ADK	-1.25135	3.89098e-08	-56725	-0.53	2.5e-05
chr11_625490_625962	-0.282148	8.48485e-08	0	1	1	HRAS	0.667727	3.46447e-09	88203	-0.51	0.00026
chr11_11993904_11994342	-0.269861	2.42424e-08	1	3	4	DKK3	1.11638	0.00173059	-15427	-0.37	0.0081
chr12_56682811_56683952	-0.279685	0	1	2	3	PTGES3	0.582254	3.59774e-08	-4456	-0.7	0
chr15_50876525_50876870	-0.274379	0	1	2	3	AP4E1	0.614054	3.08309e-08	-31802	-0.53	6.2e-06
chr15_50885578_50885904	-0.356931	0	0	5	5	AP4E1	0.614054	3.08309e-08	-22768	-0.58	4.4e-07
chr15_78719851_78720599	-0.309094	0	1	0	1	CHRNB4	2.88453	2.37425e-12	-7155	-0.61	1.9e-07
chr15_82830446_82830753	0.311402	0	0	2	2	SNHG21	0.862245	0.000170581	79882	0.58	3.4e-06
chr16_102418_103070	0.290822	0	0	1	1	HBA2	-3.05981	7.38163e-25	-69806	-0.64	1.7e-07
chr16_82700834_82700979	-0.317653	0	0	1	1	CDH13	2.92258	1.33062e-29	74031	-0.66	1e-09
chr17_42087996_42088508	-0.237012	5.45455e-08	2	0	2	NKIRAS2	0.721521	8.8403e-19	76614	-0.55	2.8e-05
chr17_43068392_43068828	-0.243632	6.06061e-09	3	3	6	RUNDC1	0.552767	1.2734e-08	87827	-0.43	0.0028
chr17_50275142_50275429	-0.257008	6.06061e-08	1	0	1	XYLT2	0.831928	3.00065e-11	-70663	-0.47	0.00038
chr17_72115776_72117182	0.300566	4.84848e-08	1	0	1	SOX9	1.85725	1.90266e-06	-3838	0.43	0.0013
chr17_82329056_82329438	-0.26403	0	2	2	4	SECTM1	1.04262	0.000654463	-4636	-0.41	0.0057
chr19_8572915_8573382	-0.301504	2.42424e-08	1	2	3	PRAM1	-1.88066	3.83221e-12	69803	0.44	0.0014
chr19_53507020_53508340	-0.264691	0	2	1	3	ZNF761	0.910173	5.60278e-07	75027	-0.61	5.5e-07
chr19_55328019_55328479	-0.277861	0	1	1	2	UBE2S	1.84059	2.33805e-35	-79298	-0.62	6.8e-07
chr2_96602170_96602392	-0.26567	6.06061e-09	3	4	7	NEURL3	1.2111	0.000410797	94061	-0.42	0.0016
chr2_191049062_191049455	-0.283044	0	2	4	6	STAT1	0.777879	0.000897273	28102	-0.42	0.00088
chr20_309966_310844	0.311919	0	1	2	3	C20orf96	0.734095	7.06456e-06	19188	0.64	1.8e-07
chr20_1489080_1489410	-0.323848	0	0	1	1	FKBP1A	0.563926	6.12307e-11	95908	-0.53	1.6e-05
chr20_37990653_37990856	0.277681	6.06061e-08	0	3	3	VSTM2L	1.12082	0.0498281	87549	-0.37	0.0069
chr3_157125510_157125890	-0.27651	1.81818e-08	3	4	7	LINC00880	2.33178	3.89882e-05	2506	-0.58	4.3e-06
chr4_95533135_95533788	-0.31075	6.06061e-09	0	1	1	UNC5C	-0.914773	0.00668745	-15418	0.51	1.5e-05
chr5_151756004_151756311	-0.366917	0	1	3	4	SPARC	1.02583	2.64539e-06	68839	-0.44	0.0018
chr5_172854491_172854706	0.273681	0	2	4	6	DUSP1	-2.15313	4.16839e-16	83296	-0.44	0.00056
chr5_172871061_172871507	0.293174	0	2	4	6	DUSP1	-2.15313	4.16839e-16	99866	-0.42	0.0022
chr6_56482461_56482825	-0.215059	0	3	5	8	COL21A1	1.84936	1.12924e-08	88367	-0.34	0.0058
chr6_111799517_111800565	-0.350406	0	0	1	1	FYN	-1.22496	6.1527e-14	-72887	0.58	5.5e-07
chr7_20304777_20305364	-0.371098	0	1	1	2	ITGB8	-1.73214	0.00016738	-25338	0.62	2.4e-07
chr7_44678030_44678338	-0.291245	6.06061e-09	3	4	7	ZMIZ2	0.681141	0.000411854	-70243	-0.48	0.00017
chr7_55965469_55965769	-0.283277	6.66667e-08	0	1	1	PSPH	1.57503	6.01912e-17	-85835	-0.6	1.2e-06
chr7_56028647_56029403	-0.239749	0	3	3	6	PSPH	1.57503	6.01912e-17	-22201	-0.68	0
chr8_74273555_74274624	-0.276515	2.42424e-08	1	1	2	GDAP1	1.74971	1.12608e-13	-46506	-0.43	0.00031
chr8_98938689_98939839	0.296571	2.42424e-08	0	1	1	VPS13B	0.849791	1.44383e-12	-73427	0.54	1.6e-05
chr8_125498884_125499366	0.263332	0	1	2	3	TRIB1	-1.6425	6.16388e-16	68563	-0.53	1.1e-05
chr8_141404641_141406347	-0.356744	0	1	1	2	SLC45A4	2.1889	1.73952e-13	96336	-0.37	0.0048
chr9_68995278_68996145	-0.318722	0	0	1	1	FXN	-1.3769	8.23019e-17	-39114	0.43	0.00066
chr9_68996565_68996702	-0.266548	2.42424e-08	0	1	1	FXN	-1.3769	8.23019e-17	-38557	0.4	0.002
chrX_153966380_153966900	0.290841	6.06061e-08	0	1	1	HCFC1	0.797679	1.34196e-08	-4907	0.4	0.0058
chr1_15764586_15764723	-0.219685	4.84848e-08	0	1	1	FBLIM1	1.62492	1.94821e-10	7979	-0.4	0.0088
chr1_15836445_15836797	-0.258965	1.51515e-07	1	2	3	FBLIM1	1.62492	1.94821e-10	79838	-0.39	0.0072
chr1_19981509_19982130	-0.247394	2.06061e-07	1	1	2	PLA2G5	-1.4404	5.17175e-07	-46049	0.53	1.8e-05
chr1_24379041_24379367	-0.153199	3.09091e-07	1	0	1	GRHL3	0.6834	0.0280814	59719	-0.4	0.0025
chr1_25686093_25686578	0.212061	0	0	4	4	MAN1C1	-1.70228	1.72445e-11	68625	-0.39	0.0012
chr1_40383722_40383989	-0.181289	0	1	3	4	COL9A2	1.43678	0.000149808	65909	-0.4	0.0042
chr1_42939370_42939884	-0.187121	4.24242e-08	3	1	4	SLC2A1	2.09663	1.24401e-10	-19292	-0.45	0.0006
chr1_44048889_44049263	-0.227677	0	1	0	1	CCDC24	0.53246	0.0283131	57530	-0.55	1.5e-05
chr1_54868728_54869021	-0.215219	3.04242e-06	2	2	4	LEXM	0.707952	0.0269553	62665	-0.44	0.0016
chr1_62438722_62439253	-0.225708	1.21212e-08	0	2	2	USP1	0.65334	1.0856e-09	2425	-0.7	0
chr1_65159765_65159955	-0.180136	2.08485e-06	2	3	5	DNAJC6	3.86479	2.26355e-31	-88264	-0.37	0.0063
chr1_65170284_65170554	-0.242639	1.14545e-06	1	4	5	DNAJC6	3.86479	2.26355e-31	-77665	-0.47	0.00017
chr1_66542501_66542624	-0.16129	2.36364e-06	3	2	5	SGIP1	1.24541	0.000492416	9118	-0.42	0.00043
chr1_115711019_115711931	-0.248058	0	0	1	1	VANGL1	0.630842	4.11712e-05	69066	-0.51	3e-05
chr1_117171895_117172195	-0.231325	1.21212e-07	2	2	4	TRIM45	2.13904	5.11083e-15	49308	-0.53	1.6e-05
chr1_145766041_145766568	-0.151742	5.45455e-07	1	1	2	PIAS3	1.1566	7.8403e-17	-93268	-0.39	0.0084
chr1_145818818_145819400	-0.158649	2.24242e-07	0	1	1	PIAS3	1.1566	7.8403e-17	-40436	-0.43	0.0031
chr1_145893412_145893615	-0.16471	0	1	1	2	PIAS3	1.1566	7.8403e-17	33576	-0.62	9.2e-07
chr1_150559295_150559372	0.151749	1.38182e-06	0	1	1	ECM1	-3.32177	6.68941e-35	51233	-0.48	0.00052
chr1_151569738_151570184	-0.211957	0	2	3	5	TUFT1	1.33147	5.79478e-16	29433	-0.54	1.5e-05
chr1_151638625_151639145	-0.216885	6.06061e-09	2	2	4	TUFT1	1.33147	5.79478e-16	98320	-0.6	5.2e-07
chr1_155300866_155301173	-0.215616	9.09091e-07	2	3	5	RUSC1	1.09928	1.94644e-16	-19723	-0.45	0.0022
chr1_156118347_156118510	-0.151437	2.55758e-06	2	2	4	SLC25A44	0.618209	0.000242347	-75422	-0.45	0.002
chr1_159846077_159846654	-0.231358	0	0	1	1	TAGLN2	1.03864	6.02055e-11	-79078	-0.4	0.0043
chr1_159859947_159860383	-0.228343	6.06061e-09	0	1	1	TAGLN2	1.03864	6.02055e-11	-65349	-0.39	0.0078
chr1_161188878_161189125	-0.193599	1.27273e-07	0	2	2	DEDD	0.502804	1.7224e-11	56190	-0.54	5.4e-05
chr1_161189929_161190123	-0.196413	1.81818e-08	0	2	2	DEDD	0.502804	1.7224e-11	57241	-0.65	7e-08
chr1_168445503_168446212	-0.167709	2.42424e-08	1	2	3	XCL2	-1.75038	2.36452e-10	-97785	0.45	0.0004
chr1_172321518_172322005	-0.241337	6.36364e-07	0	2	2	C1orf105	0.830341	0.0389185	-98683	-0.41	0.00067
chr1_172449772_172450751	-0.203438	6.06061e-09	1	5	6	C1orf105	0.830341	0.0389185	29084	-0.42	0.0014
chr1_172449772_172450751	-0.203438	6.06061e-09	1	5	6	SUCO	1.39799	2.61725e-31	-81598	-0.61	2.7e-07
chr1_172453297_172453700	-0.234037	1.36364e-06	2	1	3	C1orf105	0.830341	0.0389185	32609	-0.5	6.3e-05
chr1_172453297_172453700	-0.234037	1.36364e-06	2	1	3	SUCO	1.39799	2.61725e-31	-78649	-0.47	0.00026
chr1_184945590_184945989	-0.28051	6.66667e-08	1	2	3	RNF2	0.747055	1.85624e-07	-99375	-0.57	2.4e-06
chr1_184946831_184947029	-0.241679	1.44848e-06	0	1	1	RNF2	0.747055	1.85624e-07	-98335	-0.42	0.001
chr1_184975156_184975425	-0.198379	4.66667e-07	1	0	1	RNF2	0.747055	1.85624e-07	-69939	-0.44	0.0005
chr1_201221486_201222815	-0.155344	1.27273e-07	0	1	1	TMEM9	0.852606	9.73265e-10	49912	-0.68	0
chr1_207884769_207884953	-0.170259	9.09091e-08	1	3	4	CD34	2.29648	2.22955e-25	-26449	-0.52	2.4e-05
chr1_209838494_209838974	-0.218235	3.81818e-07	2	3	5	IRF6	0.662651	0.0192756	32319	-0.64	6.5e-08
chr1_214027095_214027415	-0.186225	0	3	4	7	PROX1	-0.527844	0.0115136	43914	-0.4	0.003
chr1_218351216_218351730	0.23658	1.33333e-07	1	2	3	RRP15	0.910007	1.32804e-16	65929	0.4	0.004
chr1_223654211_223654372	-0.192593	6.54545e-07	2	0	2	CAPN8	1.36332	0.000468053	-11362	-0.43	0.00058
chr1_223654211_223654372	-0.192593	6.54545e-07	2	0	2	CAPN2	0.923044	4.16277e-07	-47221	-0.46	0.0002
chr1_223705739_223706519	-0.178756	2.42424e-08	2	2	4	CAPN2	0.923044	4.16277e-07	4146	-0.46	0.00022
chr1_223705739_223706519	-0.178756	2.42424e-08	2	2	4	CAPN8	1.36332	0.000468053	40005	-0.43	0.00076
chr1_223706747_223707036	-0.154661	1.81818e-08	2	1	3	CAPN2	0.923044	4.16277e-07	5154	-0.43	0.00078
chr1_223708348_223708777	-0.194449	1.27273e-07	1	1	2	CAPN8	1.36332	0.000468053	42614	-0.49	5.6e-05
chr1_223710468_223711085	-0.248989	1.27273e-07	2	3	5	CAPN2	0.923044	4.16277e-07	8875	-0.43	0.0008
chr1_223710468_223711085	-0.248989	1.27273e-07	2	3	5	CAPN8	1.36332	0.000468053	44734	-0.36	0.0062
chr1_223711983_223712107	-0.172124	3.89697e-06	2	0	2	CAPN2	0.923044	4.16277e-07	10390	-0.51	2.8e-05
chr1_223711983_223712107	-0.172124	3.89697e-06	2	0	2	CAPN8	1.36332	0.000468053	46249	-0.38	0.0038
chr1_228114921_228115341	-0.185995	1.81818e-08	1	0	1	ARF1	0.599072	1.09731e-08	32261	-0.54	3.2e-05
chr1_229273424_229273623	-0.219849	8.9697e-07	2	1	3	CCSAP	1.064	5.57556e-14	-69671	-0.37	0.0063
chr1_241558328_241558529	-0.196356	0	2	4	6	CHML	1.85712	6.2289e-23	-81725	-0.48	0.0002
chr1_241615340_241616123	-0.218989	4.24242e-08	3	4	7	CHML	1.85712	6.2289e-23	-24131	-0.48	0.00028
chr10_11828595_11828857	0.209236	1.0303e-07	2	3	5	ECHDC3	-0.869929	0.00285464	86229	-0.44	0.00072
chr10_13078753_13079605	-0.212381	5.45455e-08	0	1	1	OPTN	0.60459	1.59787e-06	-19844	-0.54	1.7e-05
chr10_13078753_13079605	-0.212381	5.45455e-08	0	1	1	CCDC3	-0.988022	0.00534911	-20047	0.61	5.5e-07
chr10_25060294_25060708	-0.183654	2.24242e-07	2	5	7	ENKUR	0.959006	0.00936916	-1571	-0.5	4.4e-05
chr10_69278566_69278685	0.175431	3.8303e-06	0	2	2	HKDC1	2.34155	3.77796e-07	58263	0.5	8.4e-05
chr10_79407241_79407606	0.203679	1.0303e-07	0	3	3	ZCCHC24	-1.00333	5.1743e-08	-38021	-0.39	0.0026
chr10_80413928_80414167	-0.160277	2e-07	1	4	5	DYDC2	3.98122	4.27753e-17	69183	-0.55	7.5e-06
chr10_93483172_93483520	-0.20424	2.42424e-08	0	2	2	CEP55	3.45134	5.29426e-30	-13112	-0.46	0.00033
chr10_101690690_101690841	0.177731	5.4e-06	1	2	3	NPM3	0.877069	0.000631305	-92572	0.35	0.0084
chr10_123020831_123020997	-0.21609	9.09091e-07	2	4	6	C10orf88	0.523434	7.41103e-07	66428	-0.4	0.0037
chr11_616382_616517	-0.170228	2.89697e-06	0	2	2	HRAS	0.667727	3.46447e-09	79095	-0.47	0.0012
chr11_726249_726712	0.273946	7.93939e-07	0	1	1	DEAF1	0.767425	1.55033e-11	19534	0.43	0.0071
chr11_755883_756041	0.179327	0	0	1	1	DEAF1	0.767425	1.55033e-11	49168	0.58	8.6e-06
chr11_5623227_5623569	-0.1787	1.33333e-07	1	3	4	TRIM6	1.42346	2.30106e-06	27118	-0.39	0.006
chr11_17230573_17230956	-0.163927	3.57576e-07	0	1	1	NUCB2	0.618313	0.00103968	22420	-0.4	0.0019
chr11_64885621_64885872	-0.159079	2.06061e-07	1	4	5	MAP4K2	0.575131	0.000443785	82380	-0.52	8.8e-05
chr11_64887472_64887892	-0.239436	6.06061e-09	2	4	6	MAP4K2	0.575131	0.000443785	84231	-0.46	0.0011
chr11_65401577_65402302	-0.233013	0	2	2	4	FRMD8	0.560012	3.05883e-08	14978	-0.42	0.0035
chr11_65844344_65844737	-0.219561	0	2	0	2	CFL1	0.608728	2.7263e-08	-17289	-0.66	2.9e-08
chr11_65880218_65880609	-0.185388	9.15152e-07	0	1	1	CFL1	0.608728	2.7263e-08	18192	-0.52	0.00014
chr11_78068645_78069451	0.166448	1.64242e-06	0	1	1	ALG8	0.597832	1.12417e-06	-70209	0.4	0.0059
chr11_108128356_108128483	0.180253	1.27273e-07	0	3	3	ACAT1	-1.29809	1.53461e-08	6840	-0.68	0
chr11_116856717_116856875	0.151124	1.81818e-08	0	1	1	APOC3	-1.59943	2.92715e-06	27011	-0.45	0.0016
chr11_118091736_118092797	-0.187418	0	1	0	1	SCN4B	1.35478	7.15693e-06	-60091	-0.57	2.4e-06
chr11_118211055_118211285	-0.216213	6.06061e-08	1	2	3	MPZL2	0.871335	0.000465906	-53251	-0.41	0.004
chr11_118211055_118211285	-0.216213	6.06061e-08	1	2	3	SCN4B	1.35478	7.15693e-06	58167	-0.49	0.0002
chr11_118211494_118212006	-0.237778	0	3	5	8	MPZL2	0.871335	0.000465906	-52530	-0.57	5.8e-06
chr11_118211494_118212006	-0.237778	0	3	5	8	SCN4B	1.35478	7.15693e-06	58606	-0.5	0.00014
chr11_118212265_118212685	-0.193991	4.90909e-07	3	5	8	MPZL2	0.871335	0.000465906	-51851	-0.44	0.0013
chr11_118212265_118212685	-0.193991	4.90909e-07	3	5	8	SCN4B	1.35478	7.15693e-06	59377	-0.38	0.0096
chr12_6072311_6072487	-0.183314	3.93939e-07	0	1	1	VWF	1.95422	1.2614e-12	-52283	-0.52	1.1e-05
chr12_6073785_6073998	-0.166545	6.54545e-07	0	3	3	VWF	1.95422	1.2614e-12	-50772	-0.44	0.00029
chr12_6772113_6772463	0.177571	1.24242e-06	0	3	3	CDCA3	3.11294	2.82733e-40	-79603	0.52	0.00017
chr12_6773397_6773937	0.189407	9.33333e-07	0	1	1	LAG3	-1.47693	2.57186e-08	885	-0.49	0.00055
chr12_6773397_6773937	0.189407	9.33333e-07	0	1	1	CD4	-1.81909	1.1179e-14	-12921	-0.45	0.0026
chr12_6773397_6773937	0.189407	9.33333e-07	0	1	1	CDCA3	3.11294	2.82733e-40	-78129	0.51	0.00021
chr12_6881195_6881545	-0.201751	5.21212e-07	1	2	3	CD4	-1.81909	1.1179e-14	94337	0.54	6.5e-05
chr12_52081327_52081566	0.198915	8.9697e-07	0	1	1	NR4A1	-2.24088	8.28607e-15	58495	-0.39	0.0084
chr12_55823088_55823480	-0.208474	2.42424e-08	2	3	5	ORMDL2	0.67476	6.16702e-06	5169	-0.54	4.7e-05
chr12_55823735_55824114	-0.246433	6.66667e-08	2	3	5	ORMDL2	0.67476	6.16702e-06	5816	-0.46	0.0011
chr12_56006545_56006911	-0.193233	2.42424e-08	1	1	2	CDK2	0.540894	2.11994e-06	39776	-0.48	0.00051
chr12_56672225_56672524	-0.172612	2.29697e-06	2	2	4	PTGES3	0.582254	3.59774e-08	-15884	-0.51	0.00015
chr12_56685431_56686203	-0.194178	1.33333e-07	1	0	1	PTGES3	0.582254	3.59774e-08	-2205	-0.61	9.9e-07
chr12_56768615_56768781	-0.208648	5.15152e-07	2	4	6	PTGES3	0.582254	3.59774e-08	80207	-0.51	0.00012
chr12_56782642_56783136	-0.162263	1.51515e-07	0	1	1	PTGES3	0.582254	3.59774e-08	94234	-0.61	7.2e-07
chr12_56954931_56955087	0.164697	1.55152e-06	1	0	1	RDH16	-2.36765	3.93599e-09	-4287	-0.62	2.8e-07
chr12_57451496_57451606	-0.196127	0	3	4	7	MBD6	0.561199	0.00258322	-69104	-0.43	0.0041
chr12_57479112_57479526	-0.240289	1.15152e-07	1	2	3	MBD6	0.561199	0.00258322	-41184	-0.43	0.0036
chr12_57480097_57480665	-0.265837	6.06061e-09	1	2	3	MBD6	0.561199	0.00258322	-40045	-0.44	0.0031
chr12_57481147_57481668	-0.244717	2.42424e-08	1	1	2	MBD6	0.561199	0.00258322	-39042	-0.51	0.00018
chr12_57837050_57837639	0.15903	1.27273e-07	2	4	6	CDK4	1.26296	2.57346e-20	81037	0.53	0.00011
chr12_63914537_63914829	-0.20459	0	0	2	2	SRGAP1	0.814646	0.00147912	70244	-0.32	0.0088
chr12_63918636_63919369	-0.184656	1.27273e-07	3	4	7	SRGAP1	0.814646	0.00147912	74343	-0.41	0.00079
chr12_85821658_85822277	-0.151422	6.06061e-08	1	2	3	NTS	-1.19317	0.0382271	-52018	0.49	5e-05
chr12_85824980_85825149	-0.217774	7.87879e-07	1	0	1	NTS	-1.19317	0.0382271	-49146	0.34	0.0094
chr12_88566579_88566950	-0.184606	2.24242e-07	1	1	2	KITLG	1.43194	2.43747e-10	-13901	-0.4	0.00087
chr12_99912444_99912631	-0.256045	1.81818e-08	1	0	1	ANKS1B	2.18753	2.36725e-08	-72023	-0.32	0.0093
chr12_105280924_105281622	-0.178715	1.93939e-07	2	2	4	APPL2	0.597622	1.3955e-08	44686	-0.54	1.1e-05
chr12_105280924_105281622	-0.178715	1.93939e-07	2	2	4	C12orf75	1.94619	3.18946e-10	45634	-0.49	0.00011
chr12_105318319_105318853	-0.195107	1.57576e-07	3	5	8	APPL2	0.597622	1.3955e-08	82081	-0.45	0.00048
chr12_105318319_105318853	-0.195107	1.57576e-07	3	5	8	C12orf75	1.94619	3.18946e-10	83029	-0.52	3.3e-05
chr12_113325989_113326524	0.157049	1.46667e-06	0	1	1	SDS	-2.23912	5.93343e-06	-99777	-0.44	0.0012
chr12_118052802_118053423	-0.15651	9.09091e-08	2	5	7	RFC5	0.655847	1.76061e-06	39214	-0.53	4e-05
chr12_118052802_118053423	-0.15651	9.09091e-08	2	5	7	VSIG10	0.816784	1.01762e-09	-82603	-0.58	3e-06
chr12_118358936_118359191	-0.197772	2.12121e-07	0	2	2	TAOK3	0.524598	1.43078e-06	-13754	-0.51	6.5e-05
chr12_122115975_122116221	0.230685	7.57576e-07	0	4	4	BCL7A	0.751777	5.6571e-07	96553	0.44	0.0012
chr12_130776898_130777148	-0.175532	1.33333e-07	1	0	1	RAN	0.74531	1.53933e-07	-94731	-0.58	1.3e-06
chr12_130953189_130953544	-0.204621	3.0303e-08	0	2	2	RAN	0.74531	1.53933e-07	81310	-0.59	6.2e-07
chr13_23377619_23378024	-0.222637	0	0	1	1	SACS	0.5312	0.0141786	-55716	-0.42	0.00051
chr13_23378285_23378733	-0.19578	2.41818e-06	0	1	1	SACS	0.5312	0.0141786	-55007	-0.32	0.0084
chr14_22509746_22510179	-0.203404	2.12121e-07	1	2	3	ABHD4	0.970046	8.089e-12	-88058	-0.61	9.8e-07
chr14_22527830_22527900	-0.176565	3.51515e-06	0	1	1	ABHD4	0.970046	8.089e-12	-70337	-0.53	4.4e-05
chr14_22528679_22529127	-0.229603	2.71515e-06	1	1	2	ABHD4	0.970046	8.089e-12	-69110	-0.53	3.5e-05
chr14_22544934_22545510	-0.228176	1.33333e-07	1	2	3	ABHD4	0.970046	8.089e-12	-52727	-0.56	9e-06
chr14_22551638_22552123	-0.218907	6.66667e-08	1	1	2	ABHD4	0.970046	8.089e-12	-46114	-0.55	1.4e-05
chr14_22886530_22887334	0.210567	1.1697e-06	0	1	1	PRMT5	0.844667	9.76158e-10	-42251	0.45	0.0019
chr14_50924824_50925195	-0.165597	6.06061e-09	0	3	3	NIN	0.885106	9.60811e-08	93703	-0.52	4e-05
chr14_52458286_52458567	-0.240903	0	1	4	5	GPR137C	1.1957	4.27595e-09	-94581	-0.51	3.8e-05
chr14_75080765_75081417	0.161326	8e-07	0	2	2	ZC2HC1C	-1.38649	1.23147e-11	16595	-0.45	0.001
chr14_80957987_80958202	-0.199923	1.49697e-06	0	2	2	CEP128	0.947175	1.88573e-06	-1315	-0.39	0.0028
chr14_103450024_103450629	0.159776	0	0	2	2	TRMT61A	0.771908	1.92991e-10	-78555	0.56	4.8e-06
chr15_45449753_45449944	-0.201521	6.66667e-08	1	1	2	C15orf48	2.22207	4.83305e-08	19224	-0.55	1.9e-05
chr15_53712827_53713282	0.184637	6.06061e-08	0	1	1	WDR72	-1.80825	7.0365e-11	-49596	-0.39	0.0013
chr15_60374664_60375221	-0.212841	0	3	4	7	ANXA2	1.7508	7.53432e-12	-27662	-0.71	0
chr15_60379728_60379955	-0.241209	0	3	1	4	ANXA2	1.7508	7.53432e-12	-22928	-0.55	7.8e-06
chr15_60393682_60394657	-0.191683	3.63636e-08	2	5	7	ANXA2	1.7508	7.53432e-12	-8226	-0.67	0
chr15_63054216_63054570	-0.227318	3.15152e-07	2	4	6	TPM1	0.907402	4.14546e-05	11584	-0.39	0.0039
chr15_63107567_63107839	-0.222985	6.06061e-09	1	2	3	TPM1	0.907402	4.14546e-05	64935	-0.46	0.00065
chr15_72339600_72340016	-0.224866	5.93939e-07	1	1	2	HEXA	0.634529	4.69187e-05	-36460	-0.62	3.1e-07
chr15_75763061_75763598	-0.164816	2.72727e-07	1	0	1	CSPG4	2.17925	4.2043e-17	50213	-0.45	0.0008
chr15_82833075_82833314	0.182686	2.42424e-08	1	3	4	SNHG21	0.862245	0.000170581	82511	0.48	0.00024
chr16_3455810_3456319	-0.193148	1.21212e-08	1	2	3	ZNF174	0.66673	2.14846e-11	54575	-0.64	1.2e-07
chr16_3456892_3457216	-0.225737	1.33333e-07	1	1	2	ZNF174	0.66673	2.14846e-11	55657	-0.54	3.3e-05
chr16_3460554_3460733	-0.190386	1.24242e-06	0	1	1	ZNF174	0.66673	2.14846e-11	59319	-0.47	0.00057
chr16_56210379_56210674	-0.165623	6.66667e-08	0	1	1	GNAO1	-2.8019	1.21806e-14	19032	0.62	9.8e-08
chr16_56236552_56236742	0.152715	2.42424e-08	0	1	1	GNAO1	-2.8019	1.21806e-14	45205	-0.62	1e-07
chr16_56264793_56265182	-0.161755	3.0303e-08	1	3	4	GNAO1	-2.8019	1.21806e-14	73446	0.47	0.00014
chr16_82651464_82652129	-0.242901	2.66667e-07	1	2	3	CDH13	2.92258	1.33062e-29	24661	-0.48	5.8e-05
chr16_82655154_82655556	-0.166194	3.15152e-07	1	2	3	CDH13	2.92258	1.33062e-29	28351	-0.46	0.00013
chr16_82700333_82700420	-0.263071	0	0	1	1	CDH13	2.92258	1.33062e-29	73530	-0.55	2.4e-06
chr17_1801836_1802044	0.193808	1.0303e-07	0	1	1	SERPINF2	-1.148	2.30838e-05	59000	-0.4	0.0077
chr17_6706614_6706792	0.236059	2.72727e-07	0	2	2	SLC13A5	-1.25271	0.00108415	-6775	-0.48	0.00056
chr17_28952745_28953071	-0.16279	3.51515e-06	1	2	3	FAM222B	0.666248	5.6077e-08	97513	-0.44	0.0021
chr17_31439283_31439473	-0.152203	2.28485e-06	1	0	1	RAB11FIP4	1.74797	3.29569e-21	47659	-0.4	0.0017
chr17_31440336_31440747	-0.174897	1.0303e-07	2	3	5	RAB11FIP4	1.74797	3.29569e-21	48712	-0.52	2.4e-05
chr17_31468234_31468605	-0.202159	6.06061e-08	2	1	3	RAB11FIP4	1.74797	3.29569e-21	76610	-0.53	1.7e-05
chr17_31474399_31475006	-0.215748	6.06061e-09	1	0	1	RAB11FIP4	1.74797	3.29569e-21	82775	-0.65	1.8e-08
chr17_31475337_31477007	-0.242407	1.81818e-08	3	1	4	RAB11FIP4	1.74797	3.29569e-21	83713	-0.61	2.6e-07
chr17_31487052_31487396	-0.185356	6.66667e-08	1	2	3	RAB11FIP4	1.74797	3.29569e-21	95428	-0.58	1.5e-06
chr17_32794771_32795516	-0.198266	0	3	4	7	MYO1D	0.571463	0.0131743	-81661	-0.43	0.00035
chr17_39093318_39093939	-0.2139	1.38788e-06	1	2	3	PLXDC1	1.9211	2.56458e-12	-60455	-0.46	0.0002
chr17_39239026_39239235	-0.200755	1.27273e-07	1	1	2	PLXDC1	1.9211	2.56458e-12	84632	-0.45	0.00051
chr17_40095417_40095616	0.185709	3.57576e-07	0	2	2	THRA	0.552831	0.000194628	37127	0.4	0.0064
chr17_42089248_42089717	-0.237222	5.45455e-08	1	0	1	NKIRAS2	0.721521	8.8403e-19	77866	-0.65	8.1e-08
chr17_44797348_44798309	-0.278202	2.18182e-07	0	1	1	DBF4B	1.14168	1.31877e-09	88740	-0.44	0.0018
chr17_47660142_47660256	0.234347	0	2	3	5	TBX21	-0.915048	0.00100952	-72988	-0.38	0.0072
chr17_49369392_49369666	-0.166629	8.9697e-07	0	1	1	PHB	0.527632	2.55833e-06	-45239	-0.55	4.6e-06
chr17_49455544_49455769	-0.236847	1.33333e-06	0	1	1	PHB	0.527632	2.55833e-06	40639	-0.54	1.2e-05
chr17_57947478_57947669	-0.175674	5.45455e-07	1	2	3	CUEDC1	0.717947	8.90589e-06	-7654	-0.47	0.00061
chr17_75753506_75753715	-0.243088	4.44242e-06	1	0	1	UNK	0.638296	9.63872e-12	-31056	-0.45	0.0012
chr17_75754308_75754593	-0.301538	2.15152e-06	1	0	1	UNK	0.638296	9.63872e-12	-30178	-0.54	2.7e-05
chr17_75754905_75755162	-0.196227	2.81212e-06	2	0	2	UNK	0.638296	9.63872e-12	-29609	-0.51	0.00012
chr17_75851144_75851569	0.175327	2.80606e-06	0	4	4	UNK	0.638296	9.63872e-12	66373	0.52	0.00014
chr17_76551427_76552033	-0.195834	0	1	3	4	ST6GALNAC2	1.61996	1.65906e-07	-34923	-0.45	0.002
chr17_76596502_76596557	-0.230443	1.90303e-06	2	1	3	ST6GALNAC2	1.61996	1.65906e-07	9546	-0.4	0.0083
chr17_76672564_76673071	-0.201541	0	0	1	1	JMJD6	0.634051	9.45708e-07	-53728	-0.43	0.0027
chr17_78910149_78910642	-0.238805	6.54545e-07	0	3	3	CANT1	0.955404	7.5966e-22	-99225	-0.5	0.0001
chr17_78917424_78917847	-0.241506	4.56364e-06	0	2	2	CANT1	0.955404	7.5966e-22	-92020	-0.44	0.0014
chr17_78918263_78918649	-0.260669	1.41212e-06	0	1	1	CANT1	0.955404	7.5966e-22	-91218	-0.43	0.002
chr17_78920596_78921058	-0.19728	5.15152e-07	1	4	5	CANT1	0.955404	7.5966e-22	-88809	-0.49	0.00023
chr17_80025835_80026297	0.168306	3.0303e-08	1	1	2	TBC1D16	1.47968	9.14617e-16	-9551	0.47	0.00038
chr17_82235557_82236323	-0.204468	8.48485e-08	1	2	3	SECTM1	1.04262	0.000654463	-97751	-0.42	0.0047
chr18_26686661_26687017	-0.169311	1.57576e-07	1	0	1	KCTD1	1.03242	6.82372e-08	29260	-0.39	0.003
chr18_50308717_50309171	-0.243036	0	1	2	3	CFAP53	0.553949	0.0144472	42195	-0.68	0
chr18_57755404_57755896	-0.212865	2.42424e-08	1	3	4	ATP8B1	0.751798	2.50001e-05	-47419	-0.61	9.2e-08
chr18_57772471_57772674	-0.172274	2.58182e-06	1	2	3	ATP8B1	0.751798	2.50001e-05	-30641	-0.49	3.1e-05
chr18_57798637_57799209	-0.184844	9.09091e-08	3	5	8	ATP8B1	0.751798	2.50001e-05	-4106	-0.46	0.00014
chr19_1016572_1016795	0.20231	9.33333e-07	0	1	1	ARID3A	2.58231	1.2751e-13	90791	0.46	0.0011
chr19_1424614_1424687	-0.213229	2.12121e-07	1	3	4	APC2	0.861961	5.92168e-06	-21615	-0.44	0.0038
chr19_8444132_8444273	-0.252792	7.87879e-08	0	1	1	PRAM1	-1.88066	3.83221e-12	-58839	0.52	7.7e-05
chr19_8574824_8575326	-0.231143	3.15152e-07	1	3	4	PRAM1	-1.88066	3.83221e-12	71712	0.39	0.006
chr19_16440158_16440565	0.182057	6.06061e-08	0	2	2	EPS15L1	0.693526	2.2019e-07	-31520	0.38	0.0045
chr19_16675693_16677050	-0.23267	0	0	1	1	TMEM38A	0.501887	0.0192756	14566	-0.61	7.9e-07
chr19_16685088_16685278	-0.2412	0	1	0	1	TMEM38A	0.501887	0.0192756	23961	-0.52	8e-05
chr19_18429456_18429665	0.220628	5.47273e-06	0	1	1	LRRC25	-0.821068	0.00218877	31839	-0.45	0.0014
chr19_33178151_33178748	-0.175957	0	1	1	2	GPATCH1	0.509631	1.23366e-07	97271	-0.44	0.00088
chr19_35006125_35006974	-0.245736	6.66667e-08	3	4	7	GRAMD1A	1.13342	2.49227e-10	11341	-0.4	0.0099
chr19_38760047_38760333	-0.205328	3.41212e-06	3	4	7	LGALS4	1.64897	0.000165642	-53031	-0.42	0.0047
chr19_38835277_38835403	-0.188176	1.49697e-06	2	4	6	LGALS4	1.64897	0.000165642	21913	-0.47	0.0011
chr19_45402330_45402792	0.265549	3.70909e-06	0	1	1	FOSB	-4.58632	2.81368e-38	-65203	-0.44	0.0019
chr19_49868355_49868985	-0.196263	3.15152e-07	0	2	2	NUP62	0.910566	2.30491e-09	-60778	-0.41	0.0084
chr19_49895967_49896398	-0.16053	3.6303e-06	0	1	1	NUP62	0.910566	2.30491e-09	-33365	-0.42	0.0064
chr19_49917399_49917960	0.200127	2.42424e-07	0	1	1	ATF5	-1.39897	0.000121598	-10742	-0.66	4e-08
chr19_53531141_53531614	-0.250674	0	2	0	2	ZNF761	0.910173	5.60278e-07	99148	-0.56	9.6e-06
chr19_54202626_54203028	-0.205798	3.0303e-07	0	1	1	CNOT3	0.67084	1.30079e-07	64909	-0.48	0.0008
chr19_54232090_54233169	-0.234305	0	0	1	1	CNOT3	0.67084	1.30079e-07	94373	-0.58	5.8e-06
chr19_55327119_55327622	-0.219316	3.15152e-07	1	1	2	UBE2S	1.84059	2.33805e-35	-80155	-0.46	0.0014
chr19_55678522_55678878	0.224443	6.06061e-09	0	2	2	ZNF581	0.748107	1.06367e-05	43063	0.51	0.00017
chr2_9335284_9335721	-0.193355	5.09091e-07	3	5	8	ITGB1BP1	0.645361	4.58845e-08	-87826	-0.48	0.00013
chr2_12713879_12713984	-0.152876	1.27273e-07	1	1	2	TRIB2	0.862025	2.46324e-05	-2905	-0.36	0.0032
chr2_26721559_26722020	-0.158712	8.48485e-07	1	3	4	SLC35F6	0.914384	2.14942e-10	-42264	-0.43	0.00068
chr2_26721559_26722020	-0.158712	8.48485e-07	1	3	4	CENPA	3.95089	1.71191e-50	-42269	-0.44	0.0006
chr2_26967623_26968123	-0.188502	6.06061e-09	0	1	1	AGBL5	1.07852	6.12698e-21	-74241	-0.58	3.2e-06
chr2_27092398_27092631	-0.205489	3.21212e-07	2	1	3	CGREF1	2.72521	1.23781e-12	-26484	-0.58	7.1e-06
chr2_27092398_27092631	-0.205489	3.21212e-07	2	1	3	AGBL5	1.07852	6.12698e-21	50034	-0.55	2.2e-05
chr2_27302663_27303122	-0.160167	6.06061e-09	0	3	3	CAD	1.26123	2.54084e-13	85273	-0.45	0.0022
chr2_54668872_54669709	-0.214217	0	3	5	8	EML6	1.83203	7.7779e-12	-53790	-0.47	0.0002
chr2_54675482_54675708	-0.177687	4.60606e-07	0	1	1	EML6	1.83203	7.7779e-12	-47791	-0.4	0.002
chr2_73969702_73970054	-0.219108	0	1	0	1	ACTG2	1.36513	0.000819455	77388	-0.43	0.0019
chr2_73980198_73980656	-0.158259	1.33333e-07	0	1	1	ACTG2	1.36513	0.000819455	87884	-0.39	0.006
chr2_96601482_96601740	-0.208303	1.52727e-06	3	4	7	NEURL3	1.2111	0.000410797	93373	-0.44	0.00063
chr2_111944823_111945050	-0.17547	1.14545e-06	1	1	2	ANAPC1	0.682538	5.30016e-09	60133	-0.42	0.0013
chr2_169761342_169761682	-0.201196	0	3	4	7	SSB	0.534849	5.70383e-08	-30251	-0.58	4.4e-06
chr2_169761924_169762262	-0.198283	0	3	4	7	SSB	0.534849	5.70383e-08	-29671	-0.53	4.4e-05
chr2_179272843_179273268	-0.220922	5.45455e-07	2	3	5	SESTD1	1.15249	2.01354e-21	8053	-0.57	1.2e-06
chr2_182762003_182762313	0.155018	0	0	3	3	DNAJC10	0.777032	2.25125e-07	45962	0.58	5.3e-07
chr2_200466925_200467378	0.221876	0	1	2	3	SGO2	2.52948	2.59105e-48	-42630	0.57	1.5e-06
chr20_3817186_3817330	-0.156647	2.66667e-07	0	1	1	MAVS	0.501359	0.000800788	-29469	-0.4	0.0076
chr20_35208740_35208920	-0.169096	2.42424e-08	1	3	4	MMP24	1.41112	0.00013604	-17734	-0.51	0.00015
chr20_35318728_35319005	-0.213277	4.90303e-06	2	4	6	MMP24	1.41112	0.00013604	92074	-0.44	0.0016
chr20_36881701_36881988	-0.186315	3.0303e-08	1	0	1	TLDC2	2.39525	1.92964e-12	5580	-0.38	0.0076
chr20_44480151_44480839	0.230907	7.93939e-07	0	1	1	TTPAL	-0.597549	0.0176768	4265	-0.49	0.00032
chr20_45905304_45905978	-0.198443	0	1	0	1	UBE2C	4.13008	7.80276e-53	92728	-0.6	2.5e-06
chr21_36113186_36113760	-0.236361	1.21212e-08	1	1	2	CBR3	1.64747	3.70323e-07	-21152	-0.41	0.0054
chr21_42527613_42527825	-0.163922	2.13939e-06	2	3	5	RSPH1	1.037	0.00935041	31259	-0.56	4.4e-06
chr22_17639915_17639979	-0.164141	6.5697e-06	0	1	1	ATP6V1E1	0.674543	4.17126e-10	11097	-0.44	0.0011
chr22_19968597_19968796	0.198801	2.4303e-06	0	3	3	COMT	-0.892257	0.000431461	26990	-0.63	1.6e-07
chr22_19972569_19972773	0.168548	5.45455e-07	0	1	1	COMT	-0.892257	0.000431461	30962	-0.49	0.00021
chr22_23145184_23145675	0.292244	1.24848e-06	3	3	6	GNAZ	3.50292	1.05325e-23	74823	0.39	0.006
chr22_24820412_24820881	-0.208346	6.66667e-08	2	1	3	SGSM1	1.39537	7.6564e-07	14243	-0.38	0.0018
chr22_28948085_28948581	-0.15524	0	1	3	4	ZNRF3	0.601118	0.0203355	64493	-0.4	0.001
chr22_30566106_30566670	-0.220328	0	1	1	2	SLC35E4	1.58205	1.13469e-10	-68982	-0.42	0.0048
chr22_31580176_31580838	-0.20556	0	2	0	2	SFI1	0.504222	0.0189201	91488	-0.47	0.00023
chr22_38922165_38922410	-0.203019	5.69697e-07	0	1	1	APOBEC3B	2.7532	5.25005e-10	-59937	-0.38	0.009
chr22_49840060_49840466	-0.197929	5.36364e-06	1	0	1	CRELD2	0.875487	1.32413e-05	-77701	-0.42	0.0032
chr22_49840060_49840466	-0.197929	5.36364e-06	1	0	1	ALG12	0.677942	4.76181e-06	-77992	-0.5	0.00019
chr22_50018363_50019894	-0.22629	3.0303e-08	0	1	1	ALG12	0.677942	4.76181e-06	99905	-0.55	8.7e-06
chr22_50527344_50527652	-0.211511	2.06061e-07	0	1	1	NCAPH2	0.673412	6.16089e-08	19128	-0.44	0.0049
chr3_9911999_9912589	-0.180467	1.81818e-08	1	3	4	PRRT3	0.99346	4.45249e-09	-39805	-0.54	7.2e-05
chr3_40454019_40454218	-0.152106	4.84848e-07	1	0	1	ZNF620	0.549558	0.000309296	-22913	-0.47	0.0004
chr3_46960604_46960813	0.178953	1.15152e-07	1	3	4	MYL3	-0.637939	0.00121717	78435	-0.4	0.0045
chr3_46960604_46960813	0.178953	1.15152e-07	1	3	4	PTH1R	-4.18077	3.36655e-39	82858	-0.55	1.2e-05
chr3_50335385_50336446	-0.203609	4.66667e-07	0	1	1	CYB561D2	0.5304	0.000133465	-14249	-0.65	8e-08
chr3_52210590_52211111	-0.193067	6.06061e-08	3	5	8	POC1A	1.38235	4.86344e-21	55900	-0.6	1.4e-06
chr3_52236555_52237014	-0.211245	5.75758e-07	2	2	4	POC1A	1.38235	4.86344e-21	81865	-0.56	1.2e-05
chr3_52678470_52678591	0.194998	7.27273e-07	1	3	4	ITIH1	-0.92297	0.000378038	-99001	-0.47	0.00064
chr3_61564214_61565013	0.333024	4.12121e-07	0	1	1	PTPRG	1.06181	1.29529e-08	2645	0.44	0.00028
chr3_99647955_99648353	-0.207768	0	0	1	1	COL8A1	2.40992	4.1026e-10	9480	-0.36	0.0032
chr3_122931808_122932091	-0.168133	0	1	0	1	SEMA5B	2.06728	7.75487e-14	-96514	-0.42	0.0011
chr3_128069976_128070148	0.172603	5.75758e-07	0	1	1	SEC61A1	0.781763	1.18784e-06	18335	0.41	0.0028
chr3_129918261_129918580	-0.238152	1.55758e-06	0	1	1	TMCC1	0.929856	7.63142e-05	24655	-0.37	0.0081
chr3_142940607_142940911	-0.258671	0	2	4	6	PAQR9	0.563139	0.0223102	-22771	-0.67	0
chr3_142941147_142941421	-0.221278	0	2	3	5	PAQR9	0.563139	0.0223102	-22261	-0.64	1.5e-07
chr3_142941749_142942003	-0.16852	1.27273e-07	3	4	7	PAQR9	0.563139	0.0223102	-21679	-0.59	2e-06
chr3_142941749_142942003	-0.16852	1.27273e-07	3	4	7	PCOLCE2	1.26146	0.000334687	52543	-0.39	0.0091
chr3_157120781_157121012	-0.210062	1.53333e-06	3	5	8	LINC00880	2.33178	3.89882e-05	-1992	-0.5	0.0002
chr3_157129099_157129274	-0.233084	6.9697e-07	3	4	7	LINC00880	2.33178	3.89882e-05	6095	-0.53	5.7e-05
chr3_157161531_157162035	-0.194625	1.27273e-07	2	3	5	LINC00880	2.33178	3.89882e-05	38527	-0.52	7.7e-05
chr3_169965444_169965924	-0.150769	6.42424e-07	1	2	3	GPR160	1.29482	2.47358e-05	-72005	-0.48	0.00022
chr3_171012083_171012486	-0.174551	1.41818e-06	1	3	4	SLC2A2	-0.785844	0.00981001	-14264	-0.4	0.0022
chr3_171015063_171015398	-0.153621	2.62424e-06	2	3	5	SLC2A2	-0.785844	0.00981001	-11352	-0.38	0.0036
chr3_183988656_183988783	-0.189635	2.6e-06	2	1	3	ABCC5	0.910928	3.14619e-06	-29232	-0.33	0.0065
chr3_190533528_190533888	0.164208	0	2	3	5	IL1RAP	-1.65393	5.73076e-12	19477	-0.43	0.00066
chr3_196675311_196677144	-0.259227	0	0	1	1	CEP19	0.886782	1.8128e-08	-35149	-0.63	1.6e-07
chr3_196684245_196684775	-0.24637	0	0	2	2	CEP19	0.886782	1.8128e-08	-27518	-0.51	6.5e-05
chr3_196688224_196688749	-0.221068	2.42424e-08	0	1	1	CEP19	0.886782	1.8128e-08	-23544	-0.53	3.3e-05
chr3_196741967_196742158	-0.193519	1.09091e-06	1	3	4	CEP19	0.886782	1.8128e-08	29674	-0.41	0.0016
chr4_23879348_23879706	0.193383	7.93939e-07	1	1	2	PPARGC1A	-1.1557	0.000324147	-24383	-0.4	0.00089
chr4_76013157_76013702	-0.215553	0	2	3	5	CXCL10	1.35764	0.00153204	-9795	-0.48	0.00031
chr4_94526483_94526857	0.171119	3.75758e-07	1	3	4	PDLIM5	-0.977068	6.30874e-16	74626	-0.33	0.0074
chr4_95529659_95529937	-0.250978	2.42424e-08	0	1	1	UNC5C	-0.914773	0.00668745	-19269	0.45	0.00016
chr4_95534078_95534393	-0.161956	4.36364e-06	0	1	1	UNC5C	-0.914773	0.00668745	-14813	0.37	0.0026
chr4_95537256_95537576	-0.21775	1.57576e-07	0	1	1	UNC5C	-0.914773	0.00668745	-11630	0.39	0.0012
chr4_95539193_95539419	-0.196645	1.89697e-06	0	1	1	UNC5C	-0.914773	0.00668745	-9787	0.42	0.00058
chr4_95539741_95540054	-0.18632	1.27273e-07	0	1	1	UNC5C	-0.914773	0.00668745	-9152	0.42	0.00058
chr4_95543754_95544602	-0.218609	1.81818e-08	0	1	1	UNC5C	-0.914773	0.00668745	-4604	0.48	6.8e-05
chr4_99275010_99275304	0.206698	0	0	1	1	ADH1B	-2.14365	5.27783e-07	-77456	-0.66	3.6e-09
chr4_139029667_139030187	0.176356	3.0303e-08	0	3	3	NOCT	-2.09561	4.8366e-16	13878	-0.54	1e-05
chr4_165113867_165114039	-0.233618	4.77576e-06	0	2	2	KLHL2	-1.21362	1.98005e-16	-93579	0.36	0.0068
chr5_41182019_41182363	-0.189863	1.57576e-07	2	3	5	C6	-1.84165	1.76366e-08	-79075	0.35	0.0042
chr5_69514731_69515672	-0.170169	3.0303e-07	2	3	5	OCLN	0.649667	0.00199459	22439	-0.46	0.0004
chr5_69517396_69517532	-0.201464	4e-07	2	2	4	OCLN	0.649667	0.00199459	25104	-0.43	0.0009
chr5_76562006_76562544	0.208178	0	0	3	3	F2RL2	-1.44799	8.76578e-05	-60890	-0.32	0.0083
chr5_132277774_132278165	-0.2099	2.42424e-08	2	1	3	SLC22A4	1.35816	1.7619e-06	-16278	-0.47	0.00065
chr5_132277774_132278165	-0.2099	2.42424e-08	2	1	3	P4HA2	2.06111	3.03972e-21	-17150	-0.51	0.00013
chr5_138271182_138271552	-0.174691	1.43636e-06	2	2	4	CDC23	0.891498	1.101e-19	57839	-0.46	0.0006
chr5_172420389_172420615	-0.153277	4.12121e-07	1	4	5	SH3PXD2B	1.6358	7.053e-17	-33908	-0.37	0.0021
chr5_172420978_172421392	-0.181964	2.42424e-08	3	5	8	SH3PXD2B	1.6358	7.053e-17	-33131	-0.47	8e-05
chr5_172505316_172505535	-0.232135	1.39394e-07	0	1	1	SH3PXD2B	1.6358	7.053e-17	50793	-0.32	0.0092
chr5_172775348_172775547	-0.20081	7.39394e-07	3	5	8	DUSP1	-2.15313	4.16839e-16	4153	0.43	0.00074
chr5_172817110_172817574	-0.250316	6.36364e-07	2	1	3	DUSP1	-2.15313	4.16839e-16	45915	0.48	0.00013
chr5_172867190_172867454	0.228152	1.61212e-06	0	4	4	DUSP1	-2.15313	4.16839e-16	95995	-0.39	0.006
chr5_177479820_177479940	0.218091	3.97576e-06	0	1	1	PRR7	1.27387	1.83805e-07	33375	0.46	0.0012
chr5_178239510_178239957	0.290715	3.63636e-07	0	2	2	NHP2	0.638074	1.13736e-06	85543	0.5	9e-05
chr5_179825696_179825997	-0.229566	4.60606e-07	2	2	4	SQSTM1	1.64634	2.91673e-11	19298	-0.52	7.7e-05
chr6_10597741_10598248	0.228885	0	0	1	1	PAK1IP1	0.689251	6.69567e-06	-96447	0.58	9.4e-07
chr6_11055693_11056406	-0.184367	5.0303e-07	3	4	7	ELOVL2	1.19894	1.08729e-06	11379	-0.51	4.5e-05
chr6_11055693_11056406	-0.184367	5.0303e-07	3	4	7	ELOVL2-AS1	1.22569	4.10169e-05	12169	-0.53	2.2e-05
chr6_11065653_11065920	-0.249544	9.09091e-08	2	3	5	ELOVL2	1.19894	1.08729e-06	21339	-0.66	7.5e-09
chr6_11065653_11065920	-0.249544	9.09091e-08	2	3	5	ELOVL2-AS1	1.22569	4.10169e-05	22129	-0.6	5.4e-07
chr6_11067806_11068161	-0.159597	6.06061e-08	2	3	5	ELOVL2	1.19894	1.08729e-06	23492	-0.59	9.9e-07
chr6_11067806_11068161	-0.159597	6.06061e-08	2	3	5	ELOVL2-AS1	1.22569	4.10169e-05	24282	-0.56	3.9e-06
chr6_21754196_21754674	-0.206607	4e-07	1	1	2	CASC15	0.995066	0.00407008	89424	-0.33	0.0073
chr6_26121636_26122048	-0.253779	7.27273e-08	2	5	7	HFE	0.571417	0.000908515	34355	-0.48	0.00092
chr6_28382703_28383218	-0.177277	6.06061e-08	2	2	4	ZSCAN12	0.669782	3.00218e-06	-16516	-0.48	0.0002
chr6_28382703_28383218	-0.177277	6.06061e-08	2	2	4	ZSCAN31	1.48532	5.51608e-07	26432	-0.61	5.2e-07
chr6_31654980_31655183	-0.192512	7.27273e-08	1	2	3	MSH5	1.20843	0.00017307	-84765	-0.5	0.00061
chr6_31831534_31831721	-0.211401	1.41818e-06	1	3	4	MSH5	1.20843	0.00017307	91586	-0.46	0.0027
chr6_32197978_32198140	-0.160634	4e-07	0	1	1	PRRT1	-0.691291	0.0264619	44895	0.43	0.0065
chr6_32847125_32847253	0.222463	6.06061e-09	0	1	1	TAP1	1.07505	1.51306e-05	-6725	0.45	0.0015
chr6_42936439_42936696	0.18124	3.63636e-08	1	1	2	GNMT	-2.58108	5.46726e-10	-24062	-0.77	0
chr6_43126292_43126740	-0.164312	1.69091e-06	0	1	1	CUL9	0.696391	1.03118e-06	-55435	-0.42	0.005
chr6_56478458_56478750	-0.240864	4.90303e-06	2	3	5	COL21A1	1.84936	1.12924e-08	84364	-0.32	0.0081
chr6_111782306_111782627	-0.204971	6.06061e-08	0	3	3	FYN	-1.22496	6.1527e-14	-90825	0.44	0.00027
chr6_111783543_111784224	-0.231468	2.38788e-06	1	2	3	FYN	-1.22496	6.1527e-14	-89228	0.47	7.1e-05
chr6_111785166_111785832	-0.250848	2.42424e-08	1	2	3	FYN	-1.22496	6.1527e-14	-87620	0.52	1.2e-05
chr6_111787023_111787673	-0.208014	5.0303e-07	0	1	1	FYN	-1.22496	6.1527e-14	-85779	0.5	2.6e-05
chr6_111800968_111801590	-0.295706	3.15152e-07	0	1	1	FYN	-1.22496	6.1527e-14	-71862	0.5	2.4e-05
chr6_111802463_111802839	-0.306376	7.39394e-07	1	2	3	FYN	-1.22496	6.1527e-14	-70613	0.5	3e-05
chr6_111822804_111823458	-0.258078	5.75758e-07	1	2	3	FYN	-1.22496	6.1527e-14	-49994	0.52	9.2e-06
chr6_111826795_111827090	-0.274899	3.93939e-07	1	2	3	FYN	-1.22496	6.1527e-14	-46362	0.44	0.00022
chr6_111833378_111833730	-0.268953	3.53333e-06	1	2	3	FYN	-1.22496	6.1527e-14	-39722	0.47	8.1e-05
chr6_111848407_111848756	-0.24053	1.27273e-07	0	2	2	FYN	-1.22496	6.1527e-14	-24696	0.49	3.3e-05
chr6_111849401_111849927	-0.260248	2.3697e-06	0	1	1	FYN	-1.22496	6.1527e-14	-23525	0.4	0.00096
chr6_111868257_111868939	-0.278799	6.06061e-08	0	1	1	FYN	-1.22496	6.1527e-14	-4513	0.49	4.2e-05
chr6_112145248_112145357	-0.186901	2.13939e-06	1	0	1	TUBE1	-2.29957	1.96196e-43	57719	0.39	0.007
chr6_126336783_126337052	-0.169497	0	1	1	2	CENPW	2.37272	7.59893e-29	-3122	-0.57	7.6e-07
chr6_134931036_134931196	0.168665	1.82424e-06	1	3	4	ALDH8A1	-2.15635	2.22023e-14	-18926	-0.63	3.6e-08
chr6_147106960_147107561	-0.189414	0	1	0	1	STXBP5-AS1	0.927258	0.0011279	-97053	-0.46	0.00022
chr6_147107858_147108195	-0.189682	4.24242e-08	1	0	1	STXBP5-AS1	0.927258	0.0011279	-96419	-0.37	0.0052
chr6_154862503_154862890	0.171216	2.42424e-08	0	1	1	TIAM2	1.05576	2.12611e-06	29806	0.36	0.0028
chr6_160508835_160509487	0.224179	6.06061e-09	2	1	3	LPAL2	-2.06193	7.09116e-18	-10782	-0.48	6.6e-05
chr6_161225473_161225721	-0.239651	1.4303e-06	1	0	1	AGPAT4	1.30092	1.67216e-06	-48340	-0.38	0.0016
chr6_161228794_161229084	-0.203546	2.07273e-06	0	1	1	AGPAT4	1.30092	1.67216e-06	-44977	-0.35	0.0045
chr7_5439512_5440084	-0.22928	1.45455e-07	1	0	1	TNRC18	0.67109	3.72693e-05	14098	-0.44	0.0017
chr7_20353644_20353962	-0.276904	3.75758e-07	1	0	1	ITGB8	-1.73214	0.00016738	22942	0.56	3.2e-06
chr7_20358622_20359340	-0.341132	7.33333e-07	1	0	1	ITGB8	-1.73214	0.00016738	27920	0.71	0
chr7_27663610_27663831	-0.309001	3.57576e-07	0	1	1	TAX1BP1	0.631171	4.68469e-08	-75500	-0.46	0.00024
chr7_29608908_29609354	-0.195268	8e-07	0	1	1	DPY19L2P3	0.896454	2.20838e-08	-40873	-0.42	0.0017
chr7_29609872_29610127	-0.153056	7.69697e-07	0	1	1	DPY19L2P3	0.896454	2.20838e-08	-40100	-0.5	6.3e-05
chr7_56032382_56033669	-0.239618	3.0303e-08	2	1	3	PSPH	1.57503	6.01912e-17	-17935	-0.77	0
chr7_76251397_76251880	-0.26598	0	1	0	1	SRRM3	1.56419	4.89961e-06	49497	-0.4	0.002
chr7_88127729_88128249	-0.215183	0	2	0	2	SRI	0.755436	0.00041055	-98744	-0.35	0.0086
chr7_131504053_131504680	-0.159826	4.24242e-07	1	1	2	PODXL	2.13526	2.15261e-16	-53537	-0.41	0.0014
chr7_131504882_131505117	-0.253957	0	1	0	1	PODXL	2.13526	2.15261e-16	-53100	-0.5	5e-05
chr7_131517824_131518526	-0.2231	3.27273e-07	1	0	1	PODXL	2.13526	2.15261e-16	-39691	-0.37	0.0046
chr7_134553579_134554361	-0.230824	1.27273e-07	1	0	1	BPGM	0.749713	1.81761e-09	-92447	-0.59	1.5e-06
chr7_139066078_139066774	0.150272	6.66667e-08	0	1	1	TTC26	0.860355	3.04455e-09	-66970	0.59	1.5e-06
chr7_139080634_139081151	0.175531	6.66667e-08	1	3	4	TTC26	0.860355	3.04455e-09	-52593	0.53	2.7e-05
chr7_143392898_143393067	-0.156637	6.49697e-06	2	3	5	EPHA1	0.760353	0.0254507	-15825	-0.45	0.001
chr7_143393386_143393930	-0.226202	5.57576e-07	3	3	6	EPHA1	0.760353	0.0254507	-14962	-0.5	0.00012
chr7_151114581_151115640	0.270954	6.54545e-07	0	1	1	FASTK	0.589738	1.65821e-05	33715	0.54	4.1e-05
chr8_23337806_23338583	-0.234787	6.06061e-09	0	1	1	LOXL2	2.14408	2.10793e-15	-86745	-0.48	0.00016
chr8_24387328_24387473	-0.163614	9.09091e-07	1	2	3	ADAMDEC1	4.00871	9.24113e-13	3043	-0.41	0.0012
chr8_38410264_38410426	-0.214688	3.75152e-06	1	0	1	FGFR1	-0.658918	0.027497	-58408	0.43	0.0014
chr8_41287033_41287600	-0.311761	1.27273e-07	0	1	1	SFRP1	-2.86545	4.55599e-11	-21897	0.65	5.9e-09
chr8_74276240_74276734	-0.22738	4.84848e-07	0	1	1	GDAP1	1.74971	1.12608e-13	-44396	-0.42	0.00049
chr8_79829856_79830832	-0.178567	0	1	3	4	HEY1	2.0791	1.25425e-15	61993	-0.48	0.00012
chr8_122872588_122873071	0.154541	6.06061e-09	0	1	1	ZHX2	0.607931	0.000934845	91194	0.41	0.0025
chr8_124564627_124564849	0.171933	2.44848e-06	1	3	4	TATDN1	0.659921	8.77418e-05	25169	0.51	8e-05
chr8_124604673_124605062	0.20961	4.90909e-07	1	3	4	TATDN1	0.659921	8.77418e-05	65215	0.54	6.6e-06
chr8_124606955_124607364	0.223753	0	1	3	4	TATDN1	0.659921	8.77418e-05	67497	0.69	0
chr8_134614319_134615090	-0.206909	6.06061e-09	2	1	3	ZFAT	1.01468	2.23819e-11	-97959	-0.51	1.8e-05
chr8_141289203_141289773	-0.180039	1.81818e-08	0	1	1	SLC45A4	2.1889	1.73952e-13	-18532	-0.46	0.0002
chr8_144503276_144503555	-0.211006	8.54545e-07	0	2	2	CYHR1	0.6858	4.43104e-08	37599	-0.44	0.0048
chr9_33134103_33134324	0.176269	9.09091e-08	0	3	3	B4GALT1-AS1	-2.05023	2.82383e-16	-32651	-0.52	3.3e-05
chr9_68979961_68980466	-0.231469	8.30303e-07	0	1	1	FXN	-1.3769	8.23019e-17	-54793	0.37	0.0042
chr9_68997037_68997866	-0.231668	4.24242e-08	1	1	2	FXN	-1.3769	8.23019e-17	-37393	0.39	0.003
chr9_68998276_68998422	-0.280862	3.93939e-07	1	0	1	FXN	-1.3769	8.23019e-17	-36837	0.35	0.0082
chr9_98862188_98863173	-0.238115	1.54545e-06	0	2	2	COL15A1	3.81263	9.07347e-32	-80006	-0.47	0.0003
chr9_98958047_98958326	-0.23812	7.21212e-07	0	1	1	COL15A1	3.81263	9.07347e-32	14868	-0.37	0.0023
chr9_98958735_98958933	-0.248807	1.27273e-07	0	1	1	COL15A1	3.81263	9.07347e-32	15556	-0.47	7.6e-05
chr9_99019031_99019510	-0.258456	8.48485e-08	0	1	1	COL15A1	3.81263	9.07347e-32	75852	-0.41	0.0015
chr9_124867707_124868141	-0.165656	5.39394e-07	0	1	1	OLFML2A	2.30543	8.87808e-15	90549	-0.51	9.6e-05
chr9_127972451_127972915	0.295383	1.38788e-06	1	3	4	ST6GALNAC4	0.84378	0.000717252	55413	0.57	1.2e-05
chr9_128206246_128206673	-0.254058	0	1	0	1	C9orf16	0.515098	0.000242358	45986	-0.54	3e-05
chr9_128207136_128207454	-0.206024	1.27273e-07	1	0	1	C9orf16	0.515098	0.000242358	46876	-0.44	0.0023
chr9_130499511_130499846	-0.202484	2.78788e-07	2	4	6	ASS1	-2.73747	6.99645e-25	54582	0.52	2.6e-05
chr9_130500206_130500828	-0.209216	0	3	2	5	ASS1	-2.73747	6.99645e-25	55277	0.66	1.3e-09
chrX_40167792_40168279	0.31527	1.39394e-06	0	1	1	BCOR	0.605515	4.15351e-06	-9050	0.35	0.004
chr1_1012748_1012919	-0.293198	0	1	0	1	AGRN	1.41031	3.94524e-09	-7204	-0.46	0.0012
chr1_1331401_1332905	-0.283147	6.06061e-09	0	1	1	PUSL1	0.66948	2.85097e-06	22834	-0.69	0
chr1_1331401_1332905	-0.283147	6.06061e-09	0	1	1	AL391244.1	2.04759	0.000128423	-66617	-0.65	1.2e-07
chr1_7929819_7930259	-0.26953	0	1	0	1	AL034417.4	-3.07521	2.48104e-24	-60875	0.48	0.00034
chr1_11839346_11840760	0.225539	6.06061e-08	1	4	5	PLOD1	0.99278	1.04665e-05	-93445	0.42	0.0028
chr1_15322791_15323110	-0.284845	6.06061e-09	1	0	1	FHAD1	2.41215	7.31518e-14	75519	-0.54	8.4e-06
chr1_15703189_15703885	0.253655	6.06061e-09	1	5	6	FBLIM1	1.62492	1.94821e-10	-52722	0.42	0.004
chr1_21115690_21116103	-0.23573	6.06061e-09	3	4	7	EIF4G3	0.520463	2.10693e-05	-60785	-0.44	0.00025
chr1_21262342_21262777	0.29234	6.06061e-08	0	5	5	EIF4G3	0.520463	2.10693e-05	85454	0.49	6.4e-05
chr1_23585683_23586490	-0.259047	6.06061e-09	0	1	1	ID3	-0.707076	0.0023607	25889	0.37	0.0078
chr1_23585683_23586490	-0.259047	6.06061e-09	0	1	1	E2F2	2.83779	3.49029e-19	54463	-0.59	1.1e-06
chr1_46846192_46846803	-0.309288	0	1	0	1	CYP4A11	-2.56148	7.18273e-14	-94681	0.58	5.8e-07
chr1_50971760_50972243	-0.456873	0	0	2	2	CDKN2C	1.99978	8.04555e-36	11015	-0.81	0
chr1_89725164_89725387	-0.31095	0	0	3	3	LRRC8D	0.52067	2.67886e-05	-95627	-0.68	0
chr1_110629497_110630457	-0.268969	0	0	1	1	KCNA3	-0.999094	0.0104625	-44576	0.49	9e-05
chr1_110632855_110633285	-0.304089	2.42424e-08	1	2	3	KCNA3	-0.999094	0.0104625	-41748	0.36	0.0066
chr1_116625391_116625674	-0.276611	0	2	0	2	NAP1L4P1	3.18435	9.06855e-16	91299	-0.58	1e-06
chr1_147423239_147423596	-0.296122	4.84848e-08	2	1	3	LINC00624	1.22332	4.10175e-05	-94279	-0.5	2.3e-05
chr1_147624885_147625294	-0.275014	0	2	2	4	BCL9	1.8311	1.04439e-25	83473	-0.68	0
chr1_149634406_149634667	-0.303317	2.42424e-08	2	2	4	LINC00869	0.652859	0.00049159	28072	-0.62	2.5e-07
chr1_151828746_151829484	0.27634	6.06061e-08	0	1	1	THEM5	1.60821	5.70606e-10	-24213	0.42	0.0049
chr1_151828746_151829484	0.27634	6.06061e-08	0	1	1	TDRKH	1.83964	3.2846e-36	37330	0.52	0.00013
chr1_151828746_151829484	0.27634	6.06061e-08	0	1	1	TDRKH-AS1	1.43058	9.90215e-08	37942	0.46	0.0013
chr1_151828746_151829484	0.27634	6.06061e-08	0	1	1	THEM4	0.832704	1.26249e-09	-80324	0.53	6.6e-05
chr1_155636532_155638157	-0.304576	6.06061e-09	0	2	2	ASH1L	0.643228	4.61427e-08	73725	-0.47	0.00057
chr1_157844878_157845268	-0.372151	0	0	1	1	FCRL1	-1.14575	0.020853	24773	0.38	0.0057
chr1_160691495_160691877	-0.294556	6.06061e-09	0	1	1	CD48	-1.00225	0.00134432	-19974	0.39	0.006
chr1_160691495_160691877	-0.294556	6.06061e-09	0	1	1	SLAMF7	-0.745001	0.0297256	-47180	0.38	0.0076
chr1_166872286_166872620	0.224012	6.06061e-09	0	2	2	POGK	0.885339	5.40477e-19	32839	0.62	2.2e-07
chr1_175072742_175073349	-0.275398	0	0	1	1	CACYBP	0.913697	1.61598e-10	73579	-0.63	1.3e-07
chr1_179129962_179130312	-0.337726	0	1	4	5	TOR3A	0.962268	1.60246e-07	48585	-0.53	1.3e-05
chr1_201790695_201790916	-0.434886	0	0	1	1	IPO9	1.01759	4.08255e-24	-38225	-0.65	2.1e-08
chr1_201791183_201792268	-0.293262	0	0	2	2	IPO9	1.01759	4.08255e-24	-36873	-0.64	6.6e-08
chr1_203282192_203282604	-0.325601	0	0	1	1	LINC01136	2.88925	1.3059e-07	-22705	-0.52	4.4e-05
chr1_203282871_203283067	-0.236466	3.0303e-08	0	1	1	LINC01136	2.88925	1.3059e-07	-22242	-0.55	1e-05
chr1_211944851_211945115	-0.228688	0	3	4	7	INTS7	1.11208	1.40716e-14	-90427	-0.49	7.4e-05
chr1_211944851_211945115	-0.228688	0	3	4	7	DTL	3.64938	1.56914e-44	-90438	-0.56	4e-06
chr1_224489491_224489942	-0.238366	0	2	0	2	CNIH3	0.527891	0.0204243	54831	-0.39	0.0028
chr1_225413072_225413481	-0.239503	3.63636e-08	2	3	5	LBR	0.832243	8.08564e-09	-15444	-0.42	0.00043
chr1_225454643_225455200	-0.259549	0	2	4	6	LBR	0.832243	8.08564e-09	25718	-0.61	1.2e-07
chr1_230824728_230826082	-0.234496	1.21212e-08	2	5	7	C1orf198	1.27958	2.13546e-10	-43507	-0.45	0.00016
chr1_231233621_231233850	-0.240641	3.63636e-08	1	1	2	C1orf131	0.679423	2.89195e-07	-7337	-0.45	0.00034
chr1_231233621_231233850	-0.240641	3.63636e-08	1	1	2	GNPAT	0.878215	2.34342e-13	-7357	-0.5	4.2e-05
chr1_231234148_231234613	-0.250952	0	2	4	6	C1orf131	0.679423	2.89195e-07	-6574	-0.53	1.1e-05
chr1_231234148_231234613	-0.250952	0	2	4	6	GNPAT	0.878215	2.34342e-13	-6594	-0.59	5.6e-07
chr1_231602925_231603757	-0.267934	0	0	1	1	AL445524.1	1.56389	5.60399e-16	74369	-0.64	5.4e-08
chr1_231611099_231611465	-0.363048	0	0	1	1	AL445524.1	1.56389	5.60399e-16	82543	-0.64	3.9e-08
chr1_231613066_231613856	-0.273474	0	0	3	3	AL445524.1	1.56389	5.60399e-16	84510	-0.64	5.4e-08
chr1_231614150_231614737	-0.282739	6.06061e-09	0	2	2	AL445524.1	1.56389	5.60399e-16	85594	-0.57	3.3e-06
chr1_235407524_235407855	-0.264362	0	2	1	3	ARID4B	0.541996	7.58226e-06	79305	-0.44	0.0013
chr1_235407524_235407855	-0.264362	0	2	1	3	GGPS1	0.758762	5.19107e-10	80174	-0.55	1.6e-05
chr1_236011695_236012428	0.269614	0	0	3	3	NID1	0.515506	0.0142678	-52734	0.42	0.0011
chr1_236862251_236862692	-0.286794	0	3	4	7	MTR	0.87068	2.02542e-08	66970	-0.43	0.00034
chr1_244063398_244065213	-0.260649	3.0303e-08	1	2	3	ZBTB18	0.6266	2.73421e-05	14459	-0.48	0.0002
chr1_244065510_244065852	-0.25164	6.06061e-09	1	4	5	ZBTB18	0.6266	2.73421e-05	16571	-0.47	0.00023
chr10_5089728_5090158	-0.251393	1.81818e-08	1	0	1	AKR1C3	1.99256	5.61201e-18	54374	-0.59	2.2e-06
chr10_5097252_5097702	-0.365805	1.21212e-08	0	3	3	AKR1C3	1.99256	5.61201e-18	61898	-0.71	0
chr10_5968796_5969100	-0.22064	0	2	3	5	ANKRD16	0.662213	4.92605e-06	78890	-0.55	1.4e-05
chr10_17214832_17215356	-0.363934	1.81818e-08	1	3	4	VIM-AS1	-0.827141	0.0223714	-14629	0.43	0.001
chr10_17233473_17233950	-0.323286	2.42424e-08	0	2	2	VIM-AS1	-0.827141	0.0223714	3488	0.47	0.00024
chr10_17235747_17236357	-0.257493	5.45455e-08	0	2	2	VIM-AS1	-0.827141	0.0223714	5762	0.41	0.0021
chr10_17237160_17237422	-0.412175	0	0	1	1	VIM-AS1	-0.827141	0.0223714	7175	0.47	0.00028
chr10_21079683_21080389	-0.287712	4.24242e-08	1	0	1	NEBL	1.16873	0.0145234	-93798	0.4	0.001
chr10_21097170_21097407	-0.320321	0	0	1	1	NEBL	1.16873	0.0145234	-76780	0.36	0.0036
chr10_79159901_79160168	0.401491	0	0	3	3	ZMIZ1	0.546335	0.00135132	90866	0.43	0.00068
chr10_79159901_79160168	0.401491	0	0	3	3	ZMIZ1-AS1	0.969795	0.000796584	92006	0.4	0.0017
chr10_127923359_127923797	-0.290637	0	0	1	1	CLRN3	-2.07097	4.60059e-07	30412	0.45	0.0006
chr10_127945533_127945881	-0.329074	0	1	1	2	CLRN3	-2.07097	4.60059e-07	52586	0.5	9e-05
chr10_127974861_127977224	-0.286232	2.42424e-08	0	1	1	CLRN3	-2.07097	4.60059e-07	81914	0.42	0.0017
chr10_127978276_127979742	-0.323901	1.81818e-08	1	3	4	CLRN3	-2.07097	4.60059e-07	85329	0.43	0.0009
chr10_127986251_127988158	-0.31491	4.84848e-08	1	0	1	CLRN3	-2.07097	4.60059e-07	93304	0.39	0.0036
chr10_127988360_127988998	-0.313613	0	0	2	2	CLRN3	-2.07097	4.60059e-07	95413	0.44	0.00075
chr10_127990282_127992050	-0.316715	0	1	3	4	CLRN3	-2.07097	4.60059e-07	97335	0.48	0.00016
chr10_132319950_132320117	-0.26721	0	1	0	1	PWWP2B	0.699983	0.000231257	-77051	-0.44	0.00087
chr11_625490_625962	-0.282148	8.48485e-08	0	1	1	DEAF1	0.767425	1.55033e-11	-80753	-0.6	2.5e-06
chr11_6728969_6729558	-0.346649	0	0	1	1	GVINP1	-0.731374	0.00821805	-16881	0.4	0.003
chr11_45913534_45914217	0.275576	0	0	1	1	LARGE2	1.60824	5.11884e-05	-7404	0.46	0.00055
chr11_61060053_61061629	-0.305656	0	1	2	3	VPS37C	0.60883	2.51118e-08	-99988	-0.51	5.1e-05
chr11_65298198_65298776	0.335965	0	0	2	2	FRMD8	0.560012	3.05883e-08	-87823	0.65	6.1e-08
chr11_66439329_66442100	-0.309159	0	1	0	1	DPP3	0.76607	2.14614e-06	-37913	-0.57	9e-06
chr11_96486537_96487413	-0.300187	0	0	1	1	JRKL	0.991405	2.30075e-12	96548	-0.54	1.5e-05
chr11_118010329_118010642	-0.279051	6.06061e-08	1	3	4	TMPRSS13	-1.40388	2.17656e-06	80870	0.39	0.0045
chr11_118014566_118015007	-0.300782	0	0	1	1	TMPRSS13	-1.40388	2.17656e-06	85107	0.39	0.0042
chr11_118519313_118520132	0.248493	4.24242e-08	0	4	4	PHLDB1	0.732945	0.0224491	-86308	0.52	0.0001
chr11_122845077_122845599	-0.296817	0	0	1	1	CRTAM	-0.838892	0.0236868	6577	0.35	0.0074
chr11_122852119_122853799	-0.322293	0	0	2	2	CRTAM	-0.838892	0.0236868	13619	0.35	0.0086
chr11_128705878_128706631	-0.320529	9.09091e-08	0	3	3	AP001122.1	2.56434	3.91301e-07	18956	-0.4	0.0025
chr11_128708150_128708831	-0.279863	6.06061e-08	1	4	5	AP001122.1	2.56434	3.91301e-07	21228	-0.39	0.0039
chr11_128709526_128709783	-0.289085	1.81818e-08	1	4	5	AP001122.1	2.56434	3.91301e-07	22604	-0.44	0.00057
chr11_128711297_128712744	-0.321676	6.06061e-09	1	3	4	AP001122.1	2.56434	3.91301e-07	24375	-0.37	0.0066
chr11_128713692_128713859	-0.281431	0	1	3	4	AP001122.1	2.56434	3.91301e-07	26770	-0.39	0.0036
chr11_128714227_128714379	-0.319938	0	1	3	4	AP001122.1	2.56434	3.91301e-07	27305	-0.37	0.0072
chr11_128722065_128722337	-0.295449	3.0303e-08	0	1	1	AP001122.1	2.56434	3.91301e-07	35143	-0.39	0.0033
chr11_128723964_128724357	-0.316678	6.06061e-09	2	2	4	AP001122.1	2.56434	3.91301e-07	37042	-0.4	0.0025
chr11_128756810_128756974	-0.343018	6.06061e-09	0	2	2	AP001122.1	2.56434	3.91301e-07	69888	-0.45	0.00039
chr11_128790870_128791533	-0.334071	0	0	1	1	KCNJ5	2.08792	2.1157e-13	-99823	-0.41	0.0016
chr12_5390033_5390585	-0.287641	0	0	1	1	NTF3	-3.64135	7.04039e-29	-41527	0.7	0
chr12_5435787_5436371	-0.426699	0	0	1	1	NTF3	-3.64135	7.04039e-29	3675	0.77	0
chr12_5436954_5437908	-0.31751	0	0	2	2	NTF3	-3.64135	7.04039e-29	4842	0.72	0
chr12_5438227_5438494	-0.445921	0	0	1	1	NTF3	-3.64135	7.04039e-29	6115	0.78	0
chr12_5455651_5457510	-0.301306	0	0	1	1	NTF3	-3.64135	7.04039e-29	23539	0.8	0
chr12_9948405_9948692	-0.337861	0	1	2	3	CLEC2B	-0.857908	0.00399025	78269	0.39	0.006
chr12_10247815_10248171	-0.276802	0	0	1	1	KLRD1	-1.90251	1.05181e-14	21757	0.51	6e-05
chr12_10247815_10248171	-0.276802	0	0	1	1	GABARAPL1	-1.34015	1.49053e-09	35357	0.51	5.7e-05
chr12_12901111_12901918	-0.322888	1.21212e-08	0	1	1	GPRC5D-AS1	0.635087	0.000464242	-25808	-0.51	0.00011
chr12_42565640_42566497	-0.280575	2.42424e-08	0	1	1	PRICKLE1	-1.04066	0.00606474	-23858	0.47	8.3e-05
chr12_42576405_42576748	-0.256351	2.42424e-08	0	1	1	PRICKLE1	-1.04066	0.00606474	-13607	0.33	0.008
chr12_42582456_42583148	-0.306	0	0	1	1	PRICKLE1	-1.04066	0.00606474	-7207	0.35	0.0041
chr12_42585620_42586133	-0.321376	0	0	1	1	PRICKLE1	-1.04066	0.00606474	-4222	0.37	0.0023
chr12_45259874_45260140	-0.240449	0	3	5	8	PLEKHA8P1	0.897507	2.13154e-08	43833	-0.46	0.00024
chr12_54501343_54501908	-0.322706	0	0	1	1	ITGA5	1.19184	3.86832e-08	81883	-0.39	0.0075
chr12_56479783_56479864	0.261325	0	0	3	3	SPRYD4	-1.26168	4.12714e-10	11216	-0.54	2.7e-05
chr12_56682811_56683952	-0.279685	0	1	2	3	BAZ2A	0.633359	1.83182e-05	45995	-0.51	0.00014
chr12_56682811_56683952	-0.279685	0	1	2	3	PRIM1	1.49018	2.89217e-16	-68421	-0.7	0
chr12_57094034_57094412	0.314458	5.45455e-08	0	5	5	NEMP1	1.1532	2.29412e-14	5971	0.53	6.1e-05
chr12_57094034_57094412	0.314458	5.45455e-08	0	5	5	MYO1A	3.49953	1.20212e-19	42836	0.46	0.00096
chr12_82314533_82314996	-0.25628	6.06061e-09	1	0	1	METTL25	0.517993	0.000491775	-43501	-0.44	0.00058
chr12_91169608_91170207	-0.365062	1.21212e-08	0	1	1	DCN	-2.45699	1.53438e-08	-12916	0.65	2e-08
chr12_104069809_104070374	-0.356838	0	1	3	4	GLT8D2	-0.785971	0.00879302	5626	0.63	1.3e-07
chr12_131832304_131833884	-0.242897	1.21212e-08	0	1	1	AC131009.1	1.27104	0.000154764	-95467	-0.55	8e-06
chr13_28421849_28422344	-0.256061	0	0	1	1	FLT1	0.661857	0.0011355	-72801	-0.37	0.0021
chr13_51739771_51740054	0.266225	0	0	2	2	DHRS12	-1.18329	1.97853e-12	-64103	-0.37	0.0048
chr13_98568740_98570272	-0.240738	1.81818e-08	3	5	8	STK24	0.711025	3.20151e-09	-7668	-0.51	1.4e-05
chr13_102313283_102313597	-0.29639	6.06061e-09	1	1	2	FGF14-AS2	-1.17785	9.40074e-05	-81033	0.35	0.0094
chr13_102313842_102314092	-0.30297	0	1	1	2	FGF14-AS2	-1.17785	9.40074e-05	-80538	0.36	0.006
chr13_102318511_102319059	-0.29006	2.42424e-08	1	3	4	FGF14-AS2	-1.17785	9.40074e-05	-75571	0.42	0.00098
chr13_102329836_102330295	-0.282304	4.24242e-08	0	1	1	FGF14-AS2	-1.17785	9.40074e-05	-64335	0.38	0.0032
chr13_110213615_110215433	-0.313235	6.06061e-08	0	1	1	COL4A1	2.05506	2.48568e-15	-91800	-0.39	0.0028
chr13_110217169_110217704	-0.257319	4.84848e-08	0	1	1	COL4A1	2.05506	2.48568e-15	-89529	-0.36	0.0058
chr13_110229410_110231662	-0.350406	5.45455e-08	0	1	1	COL4A1	2.05506	2.48568e-15	-75571	-0.46	0.00022
chr13_110233484_110234786	-0.297482	6.06061e-08	1	2	3	COL4A1	2.05506	2.48568e-15	-72447	-0.35	0.0082
chr13_110235017_110235637	-0.392187	5.45455e-08	0	1	1	COL4A1	2.05506	2.48568e-15	-71596	-0.39	0.003
chr13_110236441_110236740	-0.308391	0	0	1	1	COL4A1	2.05506	2.48568e-15	-70493	-0.41	0.0012
chr13_110242603_110244211	-0.355457	6.06061e-09	0	1	1	COL4A1	2.05506	2.48568e-15	-63022	-0.39	0.0022
chr13_110245050_110245934	-0.318295	8.48485e-08	0	1	1	COL4A1	2.05506	2.48568e-15	-61299	-0.35	0.0086
chr13_110248506_110249705	-0.342238	0	0	2	2	COL4A1	2.05506	2.48568e-15	-57528	-0.5	5.4e-05
chr13_110250375_110252498	-0.280026	4.24242e-08	0	1	1	COL4A1	2.05506	2.48568e-15	-54735	-0.51	3.2e-05
chr13_110258211_110258454	-0.397611	6.06061e-08	0	1	1	COL4A1	2.05506	2.48568e-15	-48779	-0.42	0.0012
chr13_110258981_110260929	-0.320177	4.24242e-08	1	1	2	COL4A1	2.05506	2.48568e-15	-46304	-0.44	0.00054
chr13_110278775_110279365	-0.388597	0	0	1	1	COL4A1	2.05506	2.48568e-15	-27868	-0.42	0.001
chr13_110279852_110280268	-0.309382	6.06061e-09	0	1	1	COL4A1	2.05506	2.48568e-15	-26965	-0.38	0.004
chr13_110280471_110281294	-0.318098	6.06061e-09	0	1	1	COL4A1	2.05506	2.48568e-15	-25939	-0.43	0.0007
chr13_110281759_110281996	-0.363979	0	0	1	1	COL4A1	2.05506	2.48568e-15	-25237	-0.35	0.0084
chr13_110283890_110284088	-0.316137	3.63636e-08	0	1	1	COL4A1	2.05506	2.48568e-15	-23145	-0.39	0.003
chr13_110285551_110286969	-0.337102	6.06061e-09	0	2	2	COL4A1	2.05506	2.48568e-15	-20264	-0.44	0.00052
chr13_110288723_110292108	-0.358369	6.06061e-09	0	1	1	COL4A1	2.05506	2.48568e-15	-15125	-0.43	0.0007
chr13_110295281_110296570	-0.359077	0	0	1	1	COL4A1	2.05506	2.48568e-15	-10663	-0.48	0.0001
chr13_110297040_110297421	-0.338307	0	0	2	2	COL4A1	2.05506	2.48568e-15	-9812	-0.41	0.0013
chr13_110301038_110302613	-0.348298	6.06061e-08	0	3	3	COL4A1	2.05506	2.48568e-15	-4620	-0.42	0.0009
chr13_110317065_110318754	-0.377338	0	0	1	1	COL4A1	2.05506	2.48568e-15	9832	-0.48	0.00013
chr13_110318961_110319241	-0.373395	0	0	1	1	COL4A1	2.05506	2.48568e-15	11728	-0.47	0.00016
chr13_110319533_110319799	-0.324801	1.81818e-08	0	1	1	COL4A1	2.05506	2.48568e-15	12300	-0.41	0.0014
chr13_110324254_110326163	-0.352315	5.45455e-08	0	2	2	COL4A1	2.05506	2.48568e-15	17021	-0.36	0.0056
chr13_110328197_110328791	-0.37071	8.48485e-08	0	1	1	COL4A1	2.05506	2.48568e-15	20964	-0.35	0.0074
chr13_110329037_110329481	-0.342451	0	0	1	1	COL4A1	2.05506	2.48568e-15	21804	-0.38	0.004
chr13_110334826_110335482	-0.330885	3.0303e-08	0	1	1	COL4A1	2.05506	2.48568e-15	27593	-0.43	0.00072
chr13_110339107_110339490	-0.302264	3.0303e-08	0	1	1	COL4A1	2.05506	2.48568e-15	31874	-0.41	0.0013
chr13_110340203_110340362	-0.388396	0	0	2	2	COL4A1	2.05506	2.48568e-15	32970	-0.41	0.0013
chr13_110342449_110343420	-0.347553	0	0	1	1	COL4A1	2.05506	2.48568e-15	35216	-0.42	0.0012
chr13_110348372_110349034	-0.315882	3.0303e-08	0	3	3	COL4A1	2.05506	2.48568e-15	41139	-0.38	0.004
chr13_110349284_110349462	-0.368968	6.06061e-09	0	1	1	COL4A1	2.05506	2.48568e-15	42051	-0.39	0.0022
chr13_110349799_110350172	-0.324256	0	0	1	1	COL4A1	2.05506	2.48568e-15	42566	-0.35	0.0092
chr13_110353226_110354476	-0.36771	0	0	1	1	COL4A1	2.05506	2.48568e-15	45993	-0.42	0.0009
chr13_110359474_110360923	-0.322876	6.06061e-09	0	1	1	COL4A1	2.05506	2.48568e-15	52241	-0.35	0.0072
chr13_110361203_110362376	-0.289501	9.69697e-08	0	1	1	COL4A1	2.05506	2.48568e-15	53970	-0.47	0.00016
chr13_110371102_110371424	-0.361622	4.24242e-08	1	1	2	COL4A1	2.05506	2.48568e-15	63869	-0.38	0.004
chr13_110371682_110371979	-0.362887	6.06061e-09	1	1	2	COL4A1	2.05506	2.48568e-15	64449	-0.47	0.0002
chr13_110373681_110374329	-0.408813	0	0	1	1	COL4A1	2.05506	2.48568e-15	66448	-0.44	0.00056
chr13_110375121_110375894	-0.38029	0	0	1	1	COL4A1	2.05506	2.48568e-15	67888	-0.46	0.00026
chr13_110395005_110396732	-0.358922	6.06061e-09	1	1	2	COL4A1	2.05506	2.48568e-15	87772	-0.54	7.8e-06
chr13_110398304_110398647	-0.350786	0	0	2	2	COL4A1	2.05506	2.48568e-15	91071	-0.52	2.2e-05
chr13_113410186_113412695	-0.286425	1.21212e-08	0	1	1	ADPRHL1	1.17593	3.42882e-05	-40829	-0.45	0.0014
chr13_113410186_113412695	-0.286425	1.21212e-08	0	1	1	TMCO3	1.62628	1.22189e-21	-78300	-0.57	7.5e-06
chr14_24290902_24291223	0.228937	3.0303e-08	0	2	2	DHRS1	-1.38138	6.06309e-09	-8610	-0.53	0.00017
chr14_75430306_75430986	0.256078	1.81818e-08	0	1	1	BATF	0.754989	0.0491761	-91439	0.37	0.0075
chr14_77323807_77324211	0.2281	5.45455e-08	0	1	1	GSTZ1	-2.4617	4.12651e-25	2923	-0.63	1.2e-07
chr15_40776036_40777157	0.245882	0	0	2	2	SPINT1	1.61718	0.000637182	-66861	0.41	0.0059
chr15_41928383_41928469	-0.27936	0	2	5	7	EHD4	0.665939	2.96138e-05	-44109	-0.49	0.00022
chr15_43798828_43799203	-0.261715	0	3	4	7	WDR76	2.46299	1.15008e-32	-27760	-0.62	4.1e-07
chr15_43798828_43799203	-0.261715	0	3	4	7	PDIA3	0.611173	0.000347138	52436	-0.51	0.00011
chr15_66484509_66484667	0.296352	0	1	3	4	ZWILCH	1.28904	3.78769e-26	-20292	0.6	1.5e-06
chr15_66488537_66488957	0.276778	0	0	2	2	ZWILCH	1.28904	3.78769e-26	-16002	0.68	0
chr15_68285738_68285918	-0.320892	6.06061e-09	0	3	3	CLN6	1.05018	5.89527e-17	28527	-0.48	0.00019
chr15_68286259_68286568	-0.29945	0	2	3	5	CLN6	1.05018	5.89527e-17	29048	-0.41	0.0026
chr15_73697040_73697470	0.257112	6.06061e-09	0	1	1	NPTN	0.567182	1.98873e-08	62906	0.41	0.0022
chr15_78719851_78720599	-0.309094	0	1	0	1	ADAMTS7	0.781089	0.00076106	-90832	-0.37	0.0078
chr15_88238551_88239003	-0.27779	0	0	1	1	NTRK3	-1.80574	3.89882e-05	-17765	0.55	2.9e-06
chr15_90211381_90211756	0.282904	6.06061e-09	0	2	2	NGRN	0.587693	3.77888e-07	-53903	0.59	1.1e-06
chr15_90213440_90213880	0.274483	0	0	4	4	NGRN	0.587693	3.77888e-07	-51779	0.49	0.00012
chr15_92795784_92796136	-0.370903	0	3	2	5	FAM174B	0.747693	0.0110845	-13748	-0.5	0.00015
chr15_95280289_95280479	-0.300939	3.0303e-08	0	1	1	LINC01197	-1.40379	1.1622e-07	-46650	0.51	2.8e-05
chr15_95301807_95302162	-0.321798	3.0303e-08	0	1	1	LINC01197	-1.40379	1.1622e-07	-24967	0.52	2.6e-05
chr16_823736_827099	-0.278887	3.0303e-08	0	1	1	CHTF18	0.957973	6.33169e-05	35690	-0.54	2.6e-05
chr16_823736_827099	-0.278887	3.0303e-08	0	1	1	HAGHL	1.45493	5.35881e-05	96800	-0.4	0.0057
chr16_2036508_2038495	0.273494	3.63636e-08	1	1	2	NTHL1	-0.778022	0.0004467	-9371	-0.52	0.00018
chr16_2036508_2038495	0.273494	3.63636e-08	1	1	2	SLC9A3R2	-1.26424	1.08785e-09	11152	-0.57	1.4e-05
chr16_3070604_3072403	-0.260218	0	1	1	2	PKMYT1	2.6912	1.35727e-28	90065	-0.62	1.2e-06
chr16_3074042_3074907	-0.262972	8.48485e-08	1	2	3	PKMYT1	2.6912	1.35727e-28	93503	-0.57	2.1e-05
chr16_75245384_75245875	0.323684	6.06061e-09	1	5	6	ZFP1	-1.61921	4.6807e-14	96892	-0.42	0.0011
chr16_83801623_83801961	-0.26668	2.42424e-08	0	1	1	AC009119.1	-1.45813	1.82596e-07	-5873	0.47	0.00026
chr16_83805652_83806134	-0.24791	1.21212e-08	0	1	1	MLYCD	-1.46816	1.52454e-15	-92992	0.41	0.0022
chr16_87841955_87842137	0.247042	6.06061e-08	0	1	1	CA5A	-1.72308	7.33827e-10	-94443	-0.43	0.0018
chr17_4209520_4210014	0.234025	0	0	2	2	CYB5D2	-1.20406	3.2894e-15	66352	-0.41	0.0024
chr17_30380979_30381431	-0.237794	6.06061e-08	0	1	1	BLMH	0.594588	0.0269184	88923	-0.51	6e-05
chr17_30970271_30971651	0.374969	0	0	1	1	AC138207.3	1.52227	0.00119309	-36668	0.42	0.0048
chr17_35162251_35163181	-0.336331	0	1	0	1	NLE1	0.666671	7.46956e-06	19936	-0.45	0.00075
chr17_35236582_35236982	-0.318243	0	0	1	1	AC022916.1	0.674955	0.00693503	-5981	-0.44	0.0011
chr17_35236582_35236982	-0.318243	0	0	1	1	NLE1	0.666671	7.46956e-06	94267	-0.55	1.1e-05
chr17_35403547_35404398	-0.272129	2.42424e-08	1	0	1	AC015911.7	-0.909004	0.0341806	-93820	0.54	3.5e-05
chr17_35518289_35518674	-0.364408	0	1	1	2	AC015911.7	-0.909004	0.0341806	20071	0.46	0.001
chr17_35519658_35520739	-0.301908	0	2	3	5	AC015911.7	-0.909004	0.0341806	21440	0.52	8.6e-05
chr17_35522523_35522635	-0.33063	0	1	2	3	AC015911.7	-0.909004	0.0341806	24305	0.44	0.0023
chr17_35523427_35523866	-0.341941	6.06061e-09	1	1	2	SLFN12L	-1.09282	0.00523672	-13995	0.51	0.0002
chr17_35523427_35523866	-0.341941	6.06061e-09	1	1	2	AC015911.7	-0.909004	0.0341806	25209	0.63	1.6e-07
chr17_35524156_35524581	-0.318097	0	1	0	1	SLFN12L	-1.09282	0.00523672	-13280	0.43	0.0037
chr17_35524156_35524581	-0.318097	0	1	0	1	AC015911.7	-0.909004	0.0341806	25938	0.53	4.5e-05
chr17_35524846_35525970	-0.313037	0	1	1	2	AC015911.7	-0.909004	0.0341806	26628	0.44	0.0025
chr17_35526621_35527168	-0.342971	0	0	2	2	AC015911.7	-0.909004	0.0341806	28403	0.58	2.9e-06
chr17_35527470_35527696	-0.329113	0	1	2	3	AC015911.7	-0.909004	0.0341806	29252	0.41	0.0069
chr17_35530038_35530278	-0.253469	0	0	1	1	SLFN12	0.63601	0.0114531	96755	-0.42	0.0049
chr17_40456346_40456690	0.252341	6.06061e-08	0	4	4	IGFBP4	-1.18559	1.89855e-10	12885	-0.47	0.00057
chr17_41972848_41973313	0.332253	0	0	2	2	CNP	0.675437	4.4281e-07	6107	0.47	0.00049
chr17_41972848_41973313	0.332253	0	0	2	2	NKIRAS2	0.721521	8.8403e-19	-38069	0.58	4.3e-06
chr17_41972848_41973313	0.332253	0	0	2	2	C17orf113	1.06628	0.000610208	-77301	0.48	0.00031
chr17_42087996_42088508	-0.237012	5.45455e-08	2	0	2	ZNF385C	2.3854	1.60878e-13	-9971	-0.58	5.5e-06
chr17_42087996_42088508	-0.237012	5.45455e-08	2	0	2	C17orf113	1.06628	0.000610208	37382	-0.41	0.0061
chr17_43559452_43559779	-0.249373	0	2	0	2	ETV4	3.52691	7.45913e-16	-19841	-0.39	0.0028
chr17_45903273_45903669	-0.355636	0	2	1	3	MAPT	3.09439	1.99474e-23	8891	-0.66	7.2e-09
chr17_47738677_47740826	-0.300346	1.21212e-08	0	1	1	KPNB1	0.629044	1.3348e-09	89201	-0.48	0.00036
chr17_48054268_48054671	0.256131	8.48485e-08	0	1	1	CBX1	0.951658	2.31148e-19	-46850	0.63	2.2e-07
chr17_48054268_48054671	0.256131	8.48485e-08	0	1	1	PRR15L	1.91435	1.39465e-06	96390	0.39	0.0096
chr17_49207790_49208096	-0.31575	4.84848e-08	0	1	1	GNGT2	-0.790854	0.00193942	-2478	0.39	0.0044
chr17_49207790_49208096	-0.31575	4.84848e-08	0	1	1	PHOSPHO1	-1.56146	1.53597e-06	-22670	0.41	0.0029
chr17_79110073_79114150	-0.348572	0	0	1	1	C1QTNF1	-1.06907	0.00678397	87259	0.47	0.00023
chr17_82329056_82329438	-0.26403	0	2	2	4	CSNK1D	0.546384	8.35947e-08	55325	-0.6	1.4e-06
chr17_83097750_83099283	-0.251911	5.45455e-08	0	1	1	B3GNTL1	0.852844	6.00068e-07	45940	-0.57	3.3e-06
chr18_3618238_3618404	-0.273805	0	3	1	4	DLGAP1-AS1	0.711162	0.00313747	24506	-0.42	0.00094
chr18_42170431_42170792	-0.329116	0	0	2	2	LINC00907	-3.71107	2.11477e-12	11148	0.48	4.9e-05
chr18_79577370_79579745	-0.360491	0	0	1	1	AC068473.5	0.769298	0.000182247	-99613	-0.59	3.7e-07
chr18_79933743_79934028	-0.275299	6.06061e-09	2	3	5	TXNL4A	0.520685	0.000621906	-99921	-0.65	4.4e-08
chr19_13098845_13099777	0.346159	8.48485e-08	0	1	1	STX10	0.515107	4.30656e-06	-50606	0.44	0.0016
chr19_14671830_14672280	-0.33015	0	1	0	1	ADGRE3	-1.8555	2.46545e-07	-17747	0.41	0.0022
chr19_14684066_14684851	-0.306667	0	1	1	2	ADGRE3	-1.8555	2.46545e-07	-5176	0.37	0.0063
chr19_29838020_29841167	-0.376764	2.42424e-08	1	1	2	CCNE1	3.24725	3.85782e-35	26122	-0.58	1.5e-06
chr19_35129730_35130308	-0.351816	0	2	1	3	AC020907.1	2.63516	7.42009e-09	38800	-0.53	8e-05
chr19_35271274_35271687	-0.354026	6.06061e-09	0	4	4	HAMP	-5.67336	2.00272e-32	-9029	0.63	3.1e-07
chr19_35271274_35271687	-0.354026	6.06061e-09	0	4	4	CD22	-0.96511	0.01433	-47574	0.45	0.0015
chr19_35952170_35953681	-0.359375	7.27273e-08	1	1	2	AC002116.2	1.29433	0.00329815	-60827	-0.53	4.6e-05
chr19_36603907_36604430	-0.3462	0	0	1	1	ZNF260	0.613916	3.58415e-07	75247	-0.4	0.007
chr19_39160472_39160917	-0.374765	0	0	1	1	PAK4	0.598665	2.49223e-06	34702	-0.35	0.0038
chr19_42250431_42251022	0.270821	0	0	3	3	ZNF526	0.767152	4.57556e-09	30160	0.55	3e-05
chr19_42250431_42251022	0.270821	0	0	3	3	PRR19	1.84087	6.78485e-08	-51076	0.4	0.0092
chr19_42250431_42251022	0.270821	0	0	3	3	PAFAH1B3	1.63935	1.91499e-22	-52524	0.59	3.1e-06
chr19_42286538_42286871	0.303106	6.06061e-09	0	2	2	PRR19	1.84087	6.78485e-08	-15227	0.58	4.8e-06
chr19_42286538_42286871	0.303106	6.06061e-09	0	2	2	PAFAH1B3	1.63935	1.91499e-22	-16675	0.67	0
chr19_42286538_42286871	0.303106	6.06061e-09	0	2	2	TMEM145	3.87254	5.76968e-22	-26454	0.6	2.4e-06
chr19_42286538_42286871	0.303106	6.06061e-09	0	2	2	ZNF526	0.767152	4.57556e-09	66267	0.58	7.2e-06
chr19_43670671_43671006	-0.245756	1.81818e-08	0	1	1	XRCC1	0.685113	1.21666e-11	90198	-0.59	2.6e-06
chr19_51271439_51272625	-0.246625	0	1	1	2	IGLON5	-2.63586	1.2601e-19	-39223	0.6	2.2e-06
chr19_53507020_53508340	-0.264691	0	2	1	3	TPM3P9	0.711605	0.000940336	75036	-0.38	0.009
chr19_54241971_54247498	-0.309617	0	0	1	1	MBOAT7	0.588515	0.000112939	52089	-0.6	2.6e-06
chr19_54248436_54249170	-0.307566	1.81818e-08	0	1	1	MBOAT7	0.588515	0.000112939	58554	-0.45	0.0019
chr19_55328019_55328479	-0.277861	0	1	1	2	KMT5C	0.968884	2.09415e-07	-11374	-0.47	0.00083
chr19_55328019_55328479	-0.277861	0	1	1	2	PPP6R1	0.612778	6.77317e-07	69024	-0.45	0.0018
chr19_56750752_56750904	-0.321764	7.87879e-08	1	0	1	PEG3	1.94433	0.000475192	-89824	0.46	0.00044
chr2_11500004_11500238	-0.252988	6.06061e-09	1	2	3	GREB1	1.87138	3.27684e-09	17663	-0.55	4.4e-06
chr2_21304505_21304831	-0.302985	0	0	1	1	AC018742.1	-2.46558	4.53532e-10	83330	0.53	4e-06
chr2_47752726_47753094	-0.334741	6.06061e-09	1	1	2	MSH6	0.761643	7.586e-14	57196	-0.5	7.2e-05
chr2_150164922_150165279	0.219926	0	1	1	2	LINC01818	-3.589	1.07026e-19	-6144	-0.71	2e-11
chr2_150165481_150165788	0.261431	0	1	0	1	LINC01818	-3.589	1.07026e-19	-5635	-0.68	3.4e-10
chr2_157427210_157427570	-0.284164	0	0	1	1	CYTIP	-0.742366	0.0299669	-61391	0.38	0.002
chr2_168243979_168244818	-0.277289	2.42424e-08	2	3	5	STK39	1.69535	6.65077e-10	-3323	-0.4	0.001
chr2_172341016_172341267	-0.254559	0	2	5	7	ITGA6	2.04168	1.23956e-34	-86087	-0.59	7.6e-07
chr2_172341487_172341806	-0.283255	0	1	1	2	ITGA6	2.04168	1.23956e-34	-85548	-0.56	3.8e-06
chr2_191864188_191865112	-0.272212	0	2	3	5	CAVIN2	-1.47117	6.19715e-10	16933	0.33	0.0064
chr2_209495052_209495439	-0.442867	0	0	2	2	MAP2	1.87692	2.13018e-09	70994	-0.47	8.3e-05
chr2_216354189_216354668	-0.305848	0	1	2	3	SMARCAL1	0.587055	3.8992e-10	-57746	-0.51	1.5e-05
chr2_218289367_218289620	-0.250864	2.42424e-08	2	2	4	GPBAR1	-0.984362	0.00692883	29871	0.52	8e-05
chr2_218311918_218312120	-0.245088	6.06061e-09	3	3	6	GPBAR1	-0.984362	0.00692883	52422	0.43	0.0037
chr2_218324575_218325497	-0.322826	0	1	3	4	GPBAR1	-0.984362	0.00692883	65079	0.49	0.00045
chr2_219450569_219452982	-0.331201	1.81818e-08	0	1	1	TMEM198	1.22942	2.49983e-06	-90681	-0.42	0.0041
chr2_227813518_227814501	-0.326949	0	1	3	4	CCL20	3.89438	3.85469e-15	7779	-0.38	0.0032
chr2_233965993_233966257	-0.371339	6.06061e-09	0	1	1	MSL3P1	2.22861	1.83182e-05	97549	-0.55	7.6e-06
chr2_233966503_233967098	-0.358039	0	0	1	1	MSL3P1	2.22861	1.83182e-05	98059	-0.56	3.8e-06
chr2_236571374_236572840	-0.304083	7.27273e-08	0	3	3	IQCA1	1.54442	2.64122e-05	63832	-0.36	0.007
chr2_240996683_240997136	0.239051	0	0	1	1	AC104809.1	-1.64975	0.0140081	10611	-0.67	3.4e-09
chr20_309966_310844	0.311919	0	1	2	3	NRSN2-AS1	1.05978	3.67736e-06	-37380	0.55	2.3e-05
chr20_309966_310844	0.311919	0	1	2	3	RBCK1	0.802707	1.04643e-09	-96654	0.66	1.8e-08
chr20_2265571_2265919	-0.252142	0	2	2	4	TGM3	1.98004	9.52642e-07	-30082	-0.59	8.2e-07
chr20_2265571_2265919	-0.252142	0	2	2	4	AL121899.1	1.65677	7.92641e-06	58354	-0.46	0.0003
chr20_2741918_2742515	-0.317264	0	1	0	1	NOP56	0.952489	7.81842e-10	89773	-0.58	3e-06
chr20_5833005_5833486	-0.354528	0	2	0	2	SHLD1	0.505893	0.00248731	82612	-0.51	1.7e-05
chr20_5845860_5846062	-0.284452	0	2	0	2	SHLD1	0.505893	0.00248731	95467	-0.5	2.1e-05
chr20_8114146_8115155	-0.378242	0	1	0	1	PLCB1	2.06939	1.94563e-25	36895	-0.8	0
chr20_17644163_17644967	0.260278	0	0	2	2	BFSP1	1.53082	1.04255e-09	74943	0.43	0.0012
chr20_23080350_23082604	-0.360611	0	0	2	2	THBD	-0.954202	0.000803641	30609	0.44	0.00044
chr20_31704389_31704843	-0.250121	6.06061e-09	3	5	8	ID1	-2.9549	2.36887e-26	99106	0.67	0
chr20_32289257_32289487	-0.275169	0	3	5	8	PLAGL2	0.734728	9.92361e-06	81466	-0.46	0.00065
chr20_38839020_38839445	-0.305348	7.27273e-08	0	1	1	ACTR5	0.563907	0.000100347	90578	-0.45	0.00048
chr20_38839708_38840261	-0.286822	0	0	1	1	ACTR5	0.563907	0.000100347	91266	-0.56	5.1e-06
chr20_38840483_38841452	-0.280348	0	1	2	3	ACTR5	0.563907	0.000100347	92041	-0.54	1.3e-05
chr20_38845653_38846094	-0.297997	0	1	2	3	ACTR5	0.563907	0.000100347	97211	-0.55	6.9e-06
chr20_38847100_38847830	-0.295615	0	1	0	1	ACTR5	0.563907	0.000100347	98658	-0.59	1.1e-06
chr20_43530553_43531088	-0.228165	0	1	2	3	L3MBTL1	0.580802	0.0423006	41111	-0.48	0.00025
chr20_43652556_43653516	-0.302022	6.06061e-09	3	4	7	MYBL2	4.35177	7.52014e-44	-13503	-0.59	1e-06
chr20_62362196_62362729	0.209616	9.09091e-08	0	1	1	CABLES2	1.09242	4.00863e-15	-44556	0.44	0.0019
chr20_62422164_62424607	-0.318457	5.45455e-08	0	1	1	CABLES2	1.09242	4.00863e-15	14879	-0.63	2e-07
chr20_62422164_62424607	-0.318457	5.45455e-08	0	1	1	AL121832.2	0.873334	0.000661851	35194	-0.55	1.6e-05
chr20_62733931_62741177	-0.351003	6.06061e-09	0	1	1	MRGBP	0.785149	4.36784e-14	-55276	-0.57	8.8e-06
chr20_62838207_62838952	-0.233888	2.42424e-08	0	3	3	TCFL5	0.684273	2.33673e-05	-22811	-0.61	1.2e-06
chr20_62838207_62838952	-0.233888	2.42424e-08	0	3	3	MRGBP	0.785149	4.36784e-14	41754	-0.57	8.4e-06
chr20_63258751_63260379	-0.29774	2.42424e-08	0	1	1	AL096828.3	0.676261	0.0384692	40710	-0.47	0.00023
chr21_39660989_39662287	-0.348836	4.84848e-08	1	1	2	B3GALT5-AS1	-3.32472	1.10927e-15	48168	0.46	0.00012
chr21_41924233_41924621	0.257423	0	1	3	4	PRDM15	0.61782	1.75993e-05	44751	0.4	0.0026
chr22_20245913_20247382	0.288528	0	0	3	3	LINC00896	0.959869	0.0391963	39516	0.42	0.0027
chr22_36285546_36286428	0.274649	0	0	1	1	APOL4	0.900349	0.00523306	80706	0.52	4.4e-05
chr22_37227574_37227925	-0.277433	4.84848e-08	1	1	2	IL2RB	-1.08377	0.000326076	52520	0.45	0.00072
chr22_37281721_37281940	-0.288532	5.45455e-08	0	1	1	C1QTNF6	0.838054	0.00550363	82336	-0.4	0.0029
chr22_38213364_38213647	-0.305317	0	1	4	5	TMEM184B	1.05404	9.64946e-09	-59387	-0.53	2.4e-05
chr22_41368483_41368802	0.270646	2.42424e-08	1	0	1	RANGAP1	0.514858	0.00348963	82232	0.49	0.00017
chr22_41369108_41369476	0.264953	6.06061e-09	1	0	1	RANGAP1	0.514858	0.00348963	82857	0.53	4.7e-05
chr22_42397839_42398010	-0.295163	0	0	1	1	LINC01315	1.13384	3.5941e-05	28603	-0.42	0.0016
chr22_42397839_42398010	-0.295163	0	0	1	1	TCF20	0.597178	6.89425e-06	54223	-0.51	4.5e-05
chr22_46087858_46089131	0.337609	1.21212e-08	1	4	5	PRR34-AS1	0.651513	0.0201924	34153	0.39	0.0084
chr3_13552731_13556152	-0.296258	6.06061e-09	0	1	1	HDAC11	1.80073	8.6175e-23	73007	-0.57	1.7e-06
chr3_38116397_38116928	-0.306054	0	0	1	1	ACAA1	-1.79699	3.4799e-17	-20314	0.41	0.0036
chr3_51344303_51344551	-0.287706	6.06061e-09	0	1	1	MANF	1.00251	3.25871e-07	-40496	-0.51	3.8e-05
chr3_107429379_107429713	0.302323	2.42424e-08	1	0	1	BBX	0.530519	0.000138	-93223	0.36	0.0031
chr3_114211882_114213019	-0.346689	0	0	1	1	TIGIT	-0.819306	0.0246668	-63894	0.32	0.0091
chr3_125141523_125142263	0.379104	0	0	3	3	SLC12A8	0.839118	0.00136309	-70601	0.5	6e-05
chr3_151424342_151424853	-0.34227	1.81818e-08	1	0	1	P2RY12	-2.51472	3.07489e-13	39530	0.4	0.0025
chr3_193548669_193548864	-0.27547	6.06061e-09	1	0	1	ATP13A4	-4.3946	6.71167e-45	-44247	0.49	0.00011
chr4_580476_581894	-0.290714	0	1	0	1	PIGG	0.500087	1.45267e-06	81266	-0.46	0.0006
chr4_582153_582428	-0.284441	0	1	0	1	PIGG	0.500087	1.45267e-06	82943	-0.4	0.0047
chr4_1137261_1137685	-0.232024	0	1	3	4	SPON2	1.37473	3.57098e-09	-71277	-0.48	0.00021
chr4_1309034_1310158	0.313943	0	0	1	1	CTBP1-DT	0.593437	8.51538e-08	59734	0.43	0.0021
chr4_3369509_3370174	0.282186	0	1	2	3	HGFAC	-2.84064	1.38647e-09	-71713	-0.53	3.3e-05
chr4_57045794_57046224	-0.312322	3.63636e-08	0	1	1	NOA1	0.640039	3.82916e-08	66971	-0.38	0.0072
chr4_57045794_57046224	-0.312322	3.63636e-08	0	1	1	POLR2B	0.531737	1.91481e-07	68072	-0.37	0.0084
chr4_57046985_57047403	-0.352484	0	0	1	1	NOA1	0.640039	3.82916e-08	68162	-0.45	0.0008
chr4_57046985_57047403	-0.352484	0	0	1	1	POLR2B	0.531737	1.91481e-07	69263	-0.44	0.00092
chr4_57049600_57050911	-0.351048	0	0	2	2	NOA1	0.640039	3.82916e-08	70777	-0.52	3.6e-05
chr4_57049600_57050911	-0.351048	0	0	2	2	POLR2B	0.531737	1.91481e-07	71878	-0.56	7.6e-06
chr4_57060779_57062698	-0.225764	6.06061e-09	0	3	3	POLR2B	0.531737	1.91481e-07	83057	-0.38	0.0064
chr4_57063856_57064295	-0.293632	6.06061e-09	1	3	4	NOA1	0.640039	3.82916e-08	85033	-0.41	0.002
chr4_57063856_57064295	-0.293632	6.06061e-09	1	3	4	POLR2B	0.531737	1.91481e-07	86134	-0.4	0.0027
chr4_57066602_57066814	-0.313317	1.21212e-08	0	1	1	NOA1	0.640039	3.82916e-08	87779	-0.38	0.0054
chr4_57066602_57066814	-0.313317	1.21212e-08	0	1	1	POLR2B	0.531737	1.91481e-07	88880	-0.38	0.0048
chr4_86544981_86546544	-0.297518	0	1	2	3	PTPN13	-1.19153	0.000123086	-47771	0.5	4.8e-05
chr4_86635615_86635994	-0.304906	1.81818e-08	0	1	1	PTPN13	-1.19153	0.000123086	41300	0.51	3.4e-05
chr4_118940546_118941084	-0.288522	0	1	0	1	SYNPO2	-0.709296	0.0349075	89858	0.51	1.5e-05
chr4_144584374_144585035	-0.321264	0	1	0	1	HHIP	-4.52627	2.93438e-22	-60986	0.67	0
chr4_144698313_144699313	-0.327854	0	0	1	1	HHIP	-4.52627	2.93438e-22	52292	0.75	0
chr4_144702954_144703279	-0.306481	6.06061e-09	0	1	1	HHIP	-4.52627	2.93438e-22	56933	0.67	0
chr4_170248001_170248828	-0.262759	0	0	1	1	LINC01612	-3.71007	1.05739e-09	-25091	0.47	0.00015
chr4_170268973_170269472	-0.314912	0	0	1	1	LINC01612	-3.71007	1.05739e-09	-4447	0.56	2.2e-06
chr4_170271957_170272280	-0.37763	0	0	1	1	LINC01612	-3.71007	1.05739e-09	-1639	0.65	6.6e-09
chr5_84435869_84436379	-0.324623	0	0	1	1	EDIL3	2.79626	3.87625e-16	51076	-0.45	0.00034
chr5_111238924_111240013	-0.338901	1.81818e-08	1	2	3	CAMK4	-1.8185	3.6615e-12	15271	0.55	2.7e-06
chr5_111240224_111240896	-0.311949	6.06061e-09	0	1	1	CAMK4	-1.8185	3.6615e-12	16571	0.56	1.6e-06
chr5_111255482_111256032	-0.260403	4.84848e-08	0	1	1	CAMK4	-1.8185	3.6615e-12	31829	0.52	1e-05
chr5_149603733_149603890	-0.294886	0	2	0	2	ARHGEF37	1.54541	1.14075e-07	51786	-0.52	2.9e-05
chr5_157149333_157149853	-0.277141	0	0	1	1	ITK	-0.733179	0.0360354	6400	0.42	0.002
chr5_157172942_157173412	-0.312095	1.81818e-08	0	1	1	CYFIP2	-1.0026	0.000579606	-92667	0.38	0.0085
chr5_157178010_157178577	-0.262386	0	1	2	3	CYFIP2	-1.0026	0.000579606	-87502	0.51	9.5e-05
chr5_157198886_157199887	-0.271607	0	1	2	3	CYFIP2	-1.0026	0.000579606	-66192	0.49	0.00023
chr5_157208414_157208645	-0.312276	3.0303e-08	1	0	1	CYFIP2	-1.0026	0.000579606	-57434	0.46	0.0007
chr5_157208414_157208645	-0.312276	3.0303e-08	1	0	1	ITK	-0.733179	0.0360354	65481	0.51	7e-05
chr5_157209986_157210175	-0.328519	1.81818e-08	0	1	1	CYFIP2	-1.0026	0.000579606	-55904	0.44	0.0011
chr5_157216881_157217262	-0.299052	3.0303e-08	0	1	1	CYFIP2	-1.0026	0.000579606	-48817	0.43	0.0017
chr5_159210209_159210494	-0.319404	0	0	2	2	UBLCP1	0.533543	6.96037e-08	-52587	-0.55	5.4e-06
chr5_160475977_160476503	-0.270658	0	2	2	4	ZBED8	1.16001	2.57149e-12	75880	-0.64	8.8e-08
chr5_169649018_169650087	-0.297347	8.48485e-08	0	1	1	SPDL1	2.07549	2.60531e-55	65384	-0.47	0.00018
chr5_172871061_172871507	0.293174	0	2	4	6	AC008429.1	0.567907	0.0373748	-87885	0.54	1.4e-05
chr5_179801705_179802244	0.252949	1.21212e-08	1	1	2	SQSTM1	1.64634	2.91673e-11	-4154	0.41	0.0037
chr6_3379242_3380138	-0.284435	6.06061e-09	3	3	6	AL445309.1	0.699276	0.0110199	67580	-0.56	2.8e-06
chr6_3379242_3380138	-0.284435	6.06061e-09	3	3	6	SLC22A23	0.738183	0.000136459	-76884	-0.65	2.2e-08
chr6_6589991_6590710	-0.261206	9.09091e-08	0	3	3	AL031123.2	1.02588	2.05384e-05	-92923	-0.57	3.6e-06
chr6_6590968_6591456	-0.275686	8.48485e-08	0	3	3	AL031123.2	1.02588	2.05384e-05	-92177	-0.53	3e-05
chr6_26232867_26233721	0.316322	0	1	0	1	AL031777.1	1.78821	5.36193e-05	30711	0.43	0.0028
chr6_26232867_26233721	0.316322	0	1	0	1	AL353759.1	1.17635	0.00121632	60065	0.4	0.0095
chr6_30112258_30113191	-0.226196	9.09091e-08	1	2	3	PPP1R11	0.617244	7.73209e-09	45549	-0.47	0.00058
chr6_32270976_32271494	-0.371811	0	0	1	1	AGPAT1	1.00278	1.11369e-13	92880	-0.6	1.6e-06
chr6_34674119_34674345	-0.285105	6.06061e-09	1	3	4	SNRPC	0.947026	8.91329e-18	-83061	-0.59	9e-07
chr6_35402716_35403094	-0.251168	4.84848e-08	1	1	2	FANCE	1.89926	3.96618e-22	-49262	-0.51	9.5e-05
chr6_35402716_35403094	-0.251168	4.84848e-08	1	1	2	TEAD3	0.668107	6.80254e-07	-93982	-0.44	0.0012
chr6_43671658_43672550	-0.284476	0	3	1	4	MRPS18A	0.531494	1.49006e-05	-15241	-0.76	0
chr6_43671658_43672550	-0.284476	0	3	1	4	POLH-AS1	1.07657	1.04139e-05	80296	-0.44	0.002
chr6_43672812_43673293	-0.265373	6.06061e-08	3	2	5	MRPS18A	0.531494	1.49006e-05	-14498	-0.74	0
chr6_43672812_43673293	-0.265373	6.06061e-08	3	2	5	POLH-AS1	1.07657	1.04139e-05	81450	-0.41	0.0072
chr6_68638688_68639069	-0.249099	6.06061e-09	0	1	1	ADGRB3	-2.31295	5.18456e-09	3321	0.67	9.7e-10
chr6_68652171_68652426	-0.320745	0	0	2	2	ADGRB3	-2.31295	5.18456e-09	16804	0.67	8.5e-10
chr6_68711135_68711569	-0.339621	0	0	1	1	ADGRB3	-2.31295	5.18456e-09	75768	0.65	4.2e-09
chr6_68724810_68725131	-0.447944	0	0	1	1	ADGRB3	-2.31295	5.18456e-09	89443	0.63	2e-08
chr6_68730535_68730891	-0.378584	0	0	1	1	ADGRB3	-2.31295	5.18456e-09	95168	0.59	1.9e-07
chr6_73703922_73704476	-0.299035	0	2	1	3	SLC17A5	0.929356	9.38374e-09	49767	-0.56	3.4e-06
chr6_158789211_158789573	0.289208	6.06061e-09	1	3	4	OSTCP1	-0.69952	0.0353058	-68059	0.38	0.0064
chr6_159058197_159058904	-0.328492	0	0	1	1	TAGAP	-0.693132	0.0239877	13045	0.38	0.0057
chr7_214273_214853	0.243803	0	0	2	2	AC093627.5	0.683677	2.56474e-05	64807	0.45	0.0006
chr7_2614522_2615381	-0.256587	0	0	1	1	TTYH3	1.31736	5.99847e-08	-16570	-0.46	0.00033
chr7_2614522_2615381	-0.256587	0	0	1	1	IQCE	0.770488	8.06548e-07	55550	-0.65	2.1e-08
chr7_7266503_7266793	-0.304159	0	0	1	1	AC005532.1	1.84615	0.000343179	11349	-0.35	0.004
chr7_12585028_12585249	-0.262318	0	1	0	1	SCIN	2.44086	2.9633e-10	14451	-0.53	6.8e-06
chr7_20201407_20202146	-0.282977	4.24242e-08	0	1	1	AC005083.1	-1.25945	0.000624416	-15431	0.49	0.00011
chr7_20304777_20305364	-0.371098	0	1	1	2	AC005083.1	-1.25945	0.000624416	87200	0.55	7.2e-06
chr7_26183285_26183539	-0.250627	0	0	2	2	CBX3	0.518541	1.70065e-05	-17623	-0.57	3.6e-06
chr7_33907133_33907461	-0.268762	3.63636e-08	0	1	1	BMPER	-5.53285	3.83412e-85	2825	0.61	1.5e-07
chr7_33909261_33909718	-0.323762	0	0	1	1	BMPER	-5.53285	3.83412e-85	4953	0.63	2.6e-08
chr7_33909969_33910588	-0.31569	0	0	1	1	BMPER	-5.53285	3.83412e-85	5661	0.67	1.7e-11
chr7_33964844_33965094	-0.256143	1.81818e-08	1	0	1	BMPER	-5.53285	3.83412e-85	60536	0.5	2.4e-05
chr7_55965469_55965769	-0.283277	6.66667e-08	0	1	1	CCT6A	1.07248	7.26117e-26	-85861	-0.46	0.00077
chr7_56028647_56029403	-0.239749	0	3	3	6	CCT6A	1.07248	7.26117e-26	-22227	-0.61	1e-06
chr7_64243242_64244728	-0.259328	2.42424e-08	2	0	2	ZNF736	0.529646	0.00204034	-62731	-0.41	0.00073
chr7_73157208_73157667	-0.352506	6.66667e-08	1	0	1	GTF2IP4	1.23501	1.47801e-17	2270	-0.61	5.2e-07
chr7_99952202_99952891	-0.323208	6.06061e-09	1	3	4	AZGP1	-1.81916	1.5757e-08	-23266	0.4	0.006
chr7_99952202_99952891	-0.323208	6.06061e-09	1	3	4	ZSCAN21	0.563109	3.24125e-05	-96883	-0.63	2.7e-07
chr7_102575774_102576185	-0.297303	0	1	2	3	POLR2J3	0.892299	0.00213305	3121	-0.51	0.0002
chr7_102575774_102576185	-0.297303	0	1	2	3	POLR2J3	0.892299	0.00213305	3191	-0.61	1e-06
chr7_114158268_114158822	-0.33752	0	1	0	1	FOXP2	-1.38832	0.000798189	71941	0.52	1.1e-05
chr7_129169000_129169740	0.396703	3.0303e-08	0	1	1	SMO	0.807812	0.000162435	-19132	0.53	2.3e-05
chr7_129169000_129169740	0.396703	3.0303e-08	0	1	1	TSPAN33	0.576463	0.00228708	24108	0.59	1.7e-06
chr7_158581798_158581903	-0.267676	6.06061e-09	1	1	2	PTPRN2	-0.813031	0.00222712	-5885	0.43	0.00076
chr7_158582330_158582783	-0.29743	0	1	1	2	PTPRN2	-0.813031	0.00222712	-5005	0.48	9.6e-05
chr8_1999183_2000080	-0.303549	3.0303e-08	0	1	1	AC019257.1	-4.09196	4.34146e-20	24546	0.57	1.8e-06
chr8_1999183_2000080	-0.303549	3.0303e-08	0	1	1	KBTBD11	-3.25797	4.39347e-21	25305	0.61	4.2e-07
chr8_2005078_2006282	-0.312438	4.24242e-08	0	1	1	AC019257.1	-4.09196	4.34146e-20	30441	0.69	5.7e-10
chr8_2005078_2006282	-0.312438	4.24242e-08	0	1	1	KBTBD11	-3.25797	4.39347e-21	31200	0.71	0
chr8_2074493_2075023	-0.321338	0	0	2	2	AC019257.1	-4.09196	4.34146e-20	99856	0.63	3e-08
chr8_6512082_6512521	0.269704	0	0	2	2	ANGPT2	1.69991	5.68469e-12	-50888	0.55	3.1e-06
chr8_21966917_21967050	0.274614	0	0	2	2	NPM2	3.21932	1.84569e-14	-57075	0.55	1.3e-05
chr8_94440531_94441758	-0.244953	0	2	2	4	FSBP	0.549724	0.00841373	3579	-0.56	3.9e-06
chr8_94440531_94441758	-0.244953	0	2	2	4	RAD54B	1.36621	1.69092e-08	-33351	-0.59	9.3e-07
chr8_98938689_98939839	0.296571	2.42424e-08	0	1	1	STK3	0.581589	3.36549e-05	-2988	0.57	2.8e-06
chr8_102383038_102383493	0.424382	0	1	2	3	UBR5	0.954254	7.01479e-14	-29348	0.55	2.4e-06
chr8_125921415_125922020	-0.278212	4.24242e-08	0	1	1	LINC00861	-1.43799	1.66724e-05	-29229	0.44	0.00022
chr8_125932925_125933168	-0.312325	0	0	2	2	LINC00861	-1.43799	1.66724e-05	-18081	0.43	0.00035
chr8_133526577_133527096	0.254578	2.42424e-08	2	4	6	AC103706.1	0.732758	0.0131182	-46087	0.38	0.0032
chr8_142841840_142842809	-0.310348	0	1	1	2	LYPD2	-4.11726	2.09327e-22	89306	0.59	7.6e-07
chr8_142843984_142844909	-0.279179	0	1	2	3	LYPD2	-4.11726	2.09327e-22	91450	0.58	1.1e-06
chr8_142845744_142845803	-0.36538	0	0	2	2	LYPD2	-4.11726	2.09327e-22	93210	0.71	1.4e-10
chr8_143568421_143568961	0.348501	4.24242e-08	0	2	2	GSDMD	0.643467	0.000293078	15214	0.43	0.0034
chr8_143568421_143568961	0.348501	4.24242e-08	0	2	2	TIGD5	1.05935	6.11597e-13	-28874	0.43	0.0045
chr8_143568421_143568961	0.348501	4.24242e-08	0	2	2	ZNF623	0.998993	1.93206e-18	-67052	0.42	0.0053
chr8_144036387_144038261	-0.34339	0	2	0	2	SMPD5	1.02554	0.00110055	-10818	-0.47	0.00097
chr8_144036387_144038261	-0.34339	0	2	0	2	EXOSC4	0.654507	3.71521e-05	-40365	-0.72	0
chr8_144036387_144038261	-0.34339	0	2	0	2	AC109322.1	1.14497	1.56061e-06	-41004	-0.66	3.6e-08
chr8_144036387_144038261	-0.34339	0	2	0	2	GRINA	0.732	5.96284e-05	46329	-0.64	2.5e-07
chr8_144036387_144038261	-0.34339	0	2	0	2	MAF1	0.705767	3.20444e-07	-66238	-0.6	2.7e-06
chr8_144036387_144038261	-0.34339	0	2	0	2	SHARPIN	0.801649	3.18179e-09	-69863	-0.65	1.5e-07
chr8_144036387_144038261	-0.34339	0	2	0	2	HGH1	0.962713	7.76059e-09	-99508	-0.63	3.9e-07
chr9_27194749_27194963	-0.302357	0	0	1	1	TEK	-1.89051	1.48461e-10	85608	0.55	2.7e-06
chr9_36249253_36249369	0.326356	0	1	3	4	GNE	-1.61334	2.94733e-19	-27687	-0.61	1.8e-07
chr9_114394877_114395050	0.263241	0	0	3	3	ORM2	-1.62047	1.52379e-07	65008	-0.58	1.9e-06
chr9_114394877_114395050	0.263241	0	0	3	3	ORM1	-1.35608	0.000229674	71821	-0.52	2.7e-05
chr9_129035583_129036038	-0.233596	0	1	0	1	NUP188	0.583002	5.38313e-06	87884	-0.41	0.0049
chr9_129035583_129036038	-0.233596	0	1	0	1	DOLK	0.69397	8.9758e-10	87964	-0.59	2.5e-06
chr9_133620541_133621243	-0.29756	6.06061e-09	0	1	1	ADAMTSL2	-1.4072	0.000487685	88377	0.57	4e-06
chrX_3286115_3286790	-0.348813	0	0	1	1	MXRA5	-0.718778	0.0471677	-59851	0.39	0.0013
chrX_46588259_46588518	0.257667	6.06061e-09	1	3	4	CHST7	-1.98945	1.21647e-20	14475	-0.65	4.4e-08
chrX_46622723_46623139	0.222989	0	2	3	5	CHST7	-1.98945	1.21647e-20	48939	-0.68	0
chrX_66018665_66019188	-0.404187	0	0	1	1	VSIG4	-1.38401	0.000200886	-20937	0.34	0.0098
chrX_118884604_118884843	-0.348783	3.0303e-08	1	1	2	LINC01285	1.94762	1.68403e-08	45050	-0.57	1.9e-06
chrX_130072072_130072191	-0.24683	6.06061e-09	1	1	2	BCORL1	0.794584	2.70003e-05	90965	-0.48	0.00024
chr1_1071084_1073322	-0.26721	0	0	1	1	AGRN	1.41031	3.94524e-09	50961	-0.51	0.0001
chr1_1343575_1343761	0.201765	1.12727e-06	0	1	1	PUSL1	0.66948	2.85097e-06	35008	0.57	2.2e-05
chr1_1343575_1343761	0.201765	1.12727e-06	0	1	1	VWA1	0.649519	0.0026249	-91100	0.43	0.0078
chr1_2494478_2494894	-0.217643	2.72727e-07	1	1	2	PRXL2B	1.45876	2.73344e-14	-91597	-0.43	0.0034
chr1_2582859_2583311	-0.185074	9.21212e-07	0	1	1	PRXL2B	1.45876	2.73344e-14	-3180	-0.46	0.00077
chr1_2584130_2584335	-0.216223	2.24242e-07	1	4	5	PRXL2B	1.45876	2.73344e-14	-2156	-0.39	0.0084
chr1_7941387_7941870	-0.264592	9.09091e-07	1	1	2	AL034417.4	-3.07521	2.48104e-24	-49264	0.43	0.0019
chr1_8004016_8004614	0.265231	1.57576e-07	3	5	8	AL034417.4	-3.07521	2.48104e-24	12882	-0.5	0.00012
chr1_8004016_8004614	0.265231	1.57576e-07	3	5	8	TNFRSF9	1.17409	0.0110044	60851	0.44	0.0014
chr1_9174111_9174401	-0.167661	1.60606e-06	1	1	2	LNCTAM34A	0.801213	0.0202169	-7603	-0.44	0.0014
chr1_9502388_9502830	-0.191433	1.45455e-07	1	2	3	AL928921.1	1.52014	0.000237214	-641	-0.55	8e-06
chr1_9544337_9544429	-0.203565	1.0303e-06	0	1	1	AL928921.1	1.52014	0.000237214	40866	-0.61	2.3e-07
chr1_9551631_9552076	-0.197524	0	2	3	5	AL928921.1	1.52014	0.000237214	48160	-0.61	2.3e-07
chr1_9551631_9552076	-0.197524	0	2	3	5	PIK3CD	-0.843056	0.00246277	-99656	0.39	0.007
chr1_9555809_9556197	-0.204296	1.46667e-06	1	3	4	AL928921.1	1.52014	0.000237214	52338	-0.58	2.1e-06
chr1_9555809_9556197	-0.204296	1.46667e-06	1	3	4	PIK3CD	-0.843056	0.00246277	-95535	0.52	4.5e-05
chr1_11718993_11719290	-0.188925	2.42424e-08	1	2	3	FBXO44	0.643054	0.00418632	64618	-0.5	0.00014
chr1_11940865_11941191	-0.178688	1.92727e-06	1	0	1	PLOD1	0.99278	1.04665e-05	6660	-0.51	6.5e-05
chr1_11990296_11990872	-0.223815	1.15152e-07	3	4	7	PLOD1	0.99278	1.04665e-05	56091	-0.42	0.0033
chr1_15197677_15198057	-0.241003	1.27273e-07	1	0	1	FHAD1	2.41215	7.31518e-14	-49215	-0.43	0.0012
chr1_15252093_15252758	-0.281977	2.95758e-06	0	1	1	FHAD1	2.41215	7.31518e-14	4821	-0.38	0.0057
chr1_15284351_15284886	-0.222516	3.15152e-07	0	1	1	FHAD1	2.41215	7.31518e-14	37079	-0.5	2.7e-05
chr1_15340247_15340644	-0.322858	4.84848e-07	0	2	2	FHAD1	2.41215	7.31518e-14	92975	-0.53	1.3e-05
chr1_15340900_15340979	-0.184035	6.84848e-07	0	1	1	FHAD1	2.41215	7.31518e-14	93628	-0.57	2e-06
chr1_15341712_15341887	-0.156562	1.10909e-06	1	2	3	FHAD1	2.41215	7.31518e-14	94440	-0.51	3e-05
chr1_15764586_15764723	-0.219685	4.84848e-08	0	1	1	TMEM82	-1.98042	3.30889e-07	22164	0.5	0.00022
chr1_18127765_18128105	-0.163287	6.06061e-08	1	2	3	IGSF21	1.60402	4.62803e-10	20019	-0.44	0.00026
chr1_19202791_19203073	-0.168366	1.57576e-07	1	3	4	AKR7A3	-2.22201	3.20729e-09	-86177	0.42	0.0036
chr1_21268587_21268922	0.244549	1.18182e-06	1	3	4	EIF4G3	0.520463	2.10693e-05	91699	0.55	4.2e-06
chr1_23588946_23589120	-0.209516	3.42424e-06	0	1	1	ID3	-0.707076	0.0023607	29152	0.41	0.0023
chr1_23588946_23589120	-0.209516	3.42424e-06	0	1	1	E2F2	2.83779	3.49029e-19	57726	-0.39	0.0036
chr1_23589677_23589797	-0.198236	5.67879e-06	0	1	1	E2F2	2.83779	3.49029e-19	58457	-0.51	4.5e-05
chr1_23617788_23618393	-0.291397	1.33333e-07	0	1	1	E2F2	2.83779	3.49029e-19	86568	-0.51	5.6e-05
chr1_24100881_24101396	-0.237111	0	0	1	1	MYOM3	1.96934	2.37579e-06	-10779	-0.49	0.0001
chr1_24379041_24379367	-0.153199	3.09091e-07	1	0	1	STPG1	1.08639	8.51283e-08	-37567	-0.55	9e-06
chr1_24379568_24380018	-0.193855	1.27273e-07	1	2	3	STPG1	1.08639	8.51283e-08	-36916	-0.47	0.00026
chr1_24394047_24394247	-0.16677	8.48485e-08	1	1	2	STPG1	1.08639	8.51283e-08	-22687	-0.56	5.7e-06
chr1_24540278_24540714	-0.193917	2.72727e-07	1	3	4	RCAN3	0.83825	1.35202e-06	37927	-0.51	6.4e-05
chr1_25774222_25774526	-0.20881	2.12121e-07	2	2	4	SELENON	0.723499	0.000108181	-25650	-0.46	0.00055
chr1_25774222_25774526	-0.20881	2.12121e-07	2	2	4	AUNIP	1.44827	9.07878e-10	-84932	-0.55	1.5e-05
chr1_26321340_26321836	0.197875	8.48485e-08	0	1	1	CEP85	1.00785	3.63492e-09	87140	0.39	0.0084
chr1_27370167_27370304	-0.184067	1.57576e-07	0	1	1	FCN3	-6.72793	1.65459e-89	-4520	0.67	0
chr1_27560333_27560893	0.173336	3.0303e-08	0	4	4	WASF2	0.644243	0.000113203	70175	0.41	0.0024
chr1_27671204_27671681	-0.242763	1.43636e-06	1	0	1	FGR	-0.94547	0.000371856	35927	0.5	0.00013
chr1_28516941_28517786	-0.201887	0	2	1	3	SNHG3	0.783828	0.00298895	10961	-0.43	0.003
chr1_28516941_28517786	-0.201887	0	2	1	3	RCC1	0.710914	3.7337e-07	10998	-0.66	2.2e-09
chr1_30745324_30745732	-0.209631	1.39394e-07	2	3	5	LINC01778	0.829974	0.0439664	-78496	-0.47	0.00023
chr1_31487984_31488293	-0.173046	2.8303e-06	0	1	1	TINAGL1	-1.01889	1.90867e-07	-88192	0.48	0.00023
chr1_31572663_31573172	-0.237758	4.24242e-08	3	3	6	TINAGL1	-1.01889	1.90867e-07	-3313	0.39	0.0048
chr1_31576998_31577352	0.258645	9.09091e-07	1	0	1	LINC01226	2.13592	3.10136e-07	70772	0.45	0.00084
chr1_35638311_35638734	-0.174886	2.60606e-07	1	2	3	NCDN	0.753939	6.43796e-06	80838	-0.43	0.0022
chr1_35638938_35639168	-0.17952	9.87879e-07	1	3	4	NCDN	0.753939	6.43796e-06	81465	-0.47	0.00041
chr1_40383722_40383989	-0.181289	0	1	3	4	ZFP69B	1.35983	5.4993e-19	-66113	-0.73	0
chr1_40383722_40383989	-0.181289	0	1	3	4	AL031985.3	1.40356	4.52835e-22	-80330	-0.7	0
chr1_40391113_40391633	-0.180898	6.36364e-07	1	3	4	ZFP69B	1.35983	5.4993e-19	-58469	-0.57	6e-06
chr1_40391113_40391633	-0.180898	6.36364e-07	1	3	4	AL031985.3	1.40356	4.52835e-22	-72686	-0.61	4.6e-07
chr1_40646057_40646537	-0.243625	6.06061e-09	1	0	1	RIMS3	1.31938	3.64216e-08	-19120	-0.37	0.0081
chr1_41238692_41238960	-0.175445	4.84848e-08	2	4	6	SCMH1	0.512722	0.00063087	-3194	-0.47	7.5e-05
chr1_44048889_44049263	-0.227677	0	1	0	1	SLC6A9	2.42688	3.36524e-14	17422	-0.54	2.4e-05
chr1_44048889_44049263	-0.227677	0	1	0	1	DPH2	0.926405	3.06602e-10	78889	-0.66	9.8e-09
chr1_44409937_44411235	-0.214925	1.02424e-06	1	0	1	RNF220	0.514362	8.73394e-08	4743	-0.52	2.4e-05
chr1_44501419_44501709	-0.196334	3.51515e-07	1	0	1	RNF220	0.514362	8.73394e-08	96225	-0.57	1.1e-06
chr1_44650429_44650798	0.151951	2e-07	0	1	1	KIF2C	3.94787	5.02232e-51	-89020	0.58	1.6e-06
chr1_44676848_44677387	-0.187352	0	3	5	8	KIF2C	3.94787	5.02232e-51	-62431	-0.66	1.1e-08
chr1_44720757_44721185	-0.161141	2.42424e-08	2	2	4	KIF2C	3.94787	5.02232e-51	-18633	-0.63	3.4e-07
chr1_44731672_44731823	-0.228156	7.63636e-07	1	2	3	KIF2C	3.94787	5.02232e-51	-7995	-0.53	7e-05
chr1_44786270_44786679	0.320035	1.57576e-07	0	1	1	BTBD19	-1.54934	2.38156e-12	-21803	-0.47	0.00073
chr1_44786270_44786679	0.320035	1.57576e-07	0	1	1	KIF2C	3.94787	5.02232e-51	46452	0.48	0.00042
chr1_50973558_50974291	-0.189877	6.06061e-09	1	1	2	CDKN2C	1.99978	8.04555e-36	12813	-0.58	1.3e-06
chr1_53966298_53966940	-0.228421	1.15152e-07	2	4	6	LRRC42	0.629247	7.11902e-10	20221	-0.42	0.0034
chr1_54081029_54081539	-0.193571	0	3	3	6	TCEANC2	0.599238	2.12881e-06	27445	-0.53	2.5e-05
chr1_54093823_54094157	-0.230243	0	2	3	5	TCEANC2	0.599238	2.12881e-06	40239	-0.61	4.4e-07
chr1_63610822_63611197	0.160375	2.72727e-07	0	3	3	ITGB3BP	0.921412	1.53805e-05	17101	0.49	0.00023
chr1_63610822_63611197	0.160375	2.72727e-07	0	3	3	PGM1	-1.22977	6.49999e-14	17546	-0.56	7.5e-06
chr1_63610822_63611197	0.160375	2.72727e-07	0	3	3	EFCAB7	0.674759	3.93599e-09	87450	0.4	0.0042
chr1_63641369_63641852	-0.179114	4.48485e-07	3	4	7	ITGB3BP	0.921412	1.53805e-05	47648	-0.41	0.002
chr1_65172567_65172965	0.169247	5.45455e-08	1	2	3	DNAJC6	3.86479	2.26355e-31	-75254	0.64	4.2e-08
chr1_75726442_75726951	-0.226783	5.0303e-07	0	3	3	AL137803.1	2.51884	5.77199e-07	2393	-0.44	0.00088
chr1_78628258_78628575	-0.209093	1.27273e-07	0	2	2	IFI44L	-1.62549	2.9116e-10	8336	0.43	0.00064
chr1_89665920_89666354	-0.214555	4e-07	1	1	2	LRRC8C-DT	-0.617375	0.0088503	33026	0.37	0.0048
chr1_89709137_89710030	-0.279429	6.06061e-09	0	1	1	LRRC8C-DT	-0.617375	0.0088503	76243	0.36	0.006
chr1_89721967_89722072	-0.173476	3.14545e-06	1	2	3	LRRC8D	0.52067	2.67886e-05	-98942	-0.39	0.0048
chr1_89724147_89724246	-0.209553	2e-06	1	1	2	LRRC8D	0.52067	2.67886e-05	-96768	-0.51	6.8e-05
chr1_89728267_89729060	-0.219659	0	1	0	1	LRRC8D	0.52067	2.67886e-05	-91954	-0.68	0
chr1_100515210_100515636	-0.213435	1.51515e-06	2	3	5	GPR88	1.32078	0.00991784	-22501	-0.34	0.0052
chr1_108817213_108817455	-0.155031	4.12121e-07	0	1	1	GPSM2	2.07787	2.35003e-30	-57895	-0.57	2e-06
chr1_109275152_109275536	-0.206272	5.45455e-08	2	5	7	PSRC1	2.04728	1.16861e-17	-7650	-0.65	2e-08
chr1_109275152_109275536	-0.206272	5.45455e-08	2	5	7	CELSR2	1.5479	6.27844e-10	25133	-0.55	6.3e-06
chr1_109299336_109299626	-0.185264	1.21212e-07	2	2	4	PSRC1	2.04728	1.16861e-17	16150	-0.52	5.2e-05
chr1_109299336_109299626	-0.185264	1.21212e-07	2	2	4	CELSR2	1.5479	6.27844e-10	49317	-0.42	0.0017
chr1_109299336_109299626	-0.185264	1.21212e-07	2	2	4	SORT1	2.06139	2.54137e-14	-98325	-0.52	3.8e-05
chr1_110877659_110877916	-0.243432	3.06667e-06	1	0	1	AL360270.1	0.855407	0.000107482	-65551	-0.45	0.00068
chr1_111422811_111423163	-0.172662	6.18182e-07	0	1	1	C1orf162	-1.62962	9.62725e-13	-50629	0.5	0.00027
chr1_111504096_111505017	-0.248999	0	2	2	4	C1orf162	-1.62962	9.62725e-13	30304	0.43	0.004
chr1_111721066_111721199	-0.169773	5.0303e-07	2	0	2	INKA2	1.2651	1.24364e-08	-18225	-0.51	3.9e-05
chr1_111721066_111721199	-0.169773	5.0303e-07	2	0	2	DDX20	0.56558	1.45046e-12	-34046	-0.53	2.2e-05
chr1_111976265_111976714	-0.185402	0	0	1	1	KCND3	-2.18308	2.64962e-07	-12441	0.48	0.00012
chr1_111976265_111976714	-0.185402	0	0	1	1	LINC01750	-1.77048	0.000234186	-13056	0.47	0.00014
chr1_115323820_115324285	-0.276687	1.57576e-07	0	1	1	NGF	-1.34237	5.49738e-07	-13951	0.44	0.00022
chr1_115711019_115711931	-0.248058	0	0	1	1	CASQ2	1.31958	6.29824e-05	-56850	-0.39	0.003
chr1_116393559_116393759	-0.151553	1.27273e-07	1	1	2	ATP1A1	1.5973	2.93753e-12	20891	-0.65	2.6e-08
chr1_116466006_116466635	-0.212709	9.09091e-08	2	2	4	NAP1L4P1	3.18435	9.06855e-16	-67457	-0.59	9.6e-07
chr1_116466006_116466635	-0.212709	9.09091e-08	2	2	4	ATP1A1	1.5973	2.93753e-12	93338	-0.41	0.0037
chr1_116921890_116922172	-0.170796	1.0303e-07	1	4	5	PTGFRN	1.38825	9.07936e-11	11833	-0.38	0.0036
chr1_143880790_143881988	-0.27864	8.36364e-07	1	0	1	FAM72C	3.35813	2.3791e-25	-89977	-0.44	0.00095
chr1_145704741_145705417	-0.178659	1.81818e-08	1	0	1	CD160	-2.69522	7.71677e-56	-14054	0.62	2.1e-07
chr1_145766041_145766568	-0.151742	5.45455e-07	1	1	2	CD160	-2.69522	7.71677e-56	46570	0.63	2.3e-07
chr1_145818818_145819400	-0.158649	2.24242e-07	0	1	1	CD160	-2.69522	7.71677e-56	99347	0.45	0.0014
chr1_145893412_145893615	-0.16471	0	1	1	2	LIX1L	0.721036	1.15232e-08	-64386	-0.59	5.2e-06
chr1_145972681_145972985	-0.246969	0	2	4	6	LIX1L	0.721036	1.15232e-08	14680	-0.43	0.0048
chr1_146174086_146175037	0.255532	5.0303e-07	1	5	6	AC239799.2	3.79777	1.46265e-15	-60769	0.42	0.0015
chr1_146329521_146329815	-0.158174	6.90909e-07	2	1	3	AC239799.2	3.79777	1.46265e-15	93715	-0.39	0.0044
chr1_147579693_147579824	-0.206143	7.45455e-06	2	2	4	BCL9	1.8311	1.04439e-25	38281	-0.48	0.00014
chr1_147579693_147579824	-0.206143	7.45455e-06	2	2	4	LINC00624	1.22332	4.10175e-05	61818	-0.5	7.8e-05
chr1_147612238_147612733	-0.215158	9.69697e-07	3	2	5	BCL9	1.8311	1.04439e-25	70826	-0.46	0.00042
chr1_147612238_147612733	-0.215158	9.69697e-07	3	2	5	LINC00624	1.22332	4.10175e-05	94363	-0.38	0.0048
chr1_147625525_147625876	-0.229504	6.06061e-09	3	2	5	BCL9	1.8311	1.04439e-25	84113	-0.68	0
chr1_148018752_148019269	-0.22609	1.45455e-07	2	1	3	PDZK1P1	0.797871	0.000467137	3796	-0.4	0.003
chr1_148019643_148019817	-0.225999	3.0303e-08	2	1	3	PDZK1P1	0.797871	0.000467137	4687	-0.39	0.0042
chr1_148020033_148021110	-0.171206	1.60606e-06	2	1	3	PDZK1P1	0.797871	0.000467137	5077	-0.42	0.0015
chr1_148021456_148022050	-0.224569	2.73939e-06	2	1	3	PDZK1P1	0.797871	0.000467137	6500	-0.43	0.001
chr1_148087286_148087488	-0.246055	3.74545e-06	2	1	3	PDZK1P1	0.797871	0.000467137	72330	-0.51	0.0001
chr1_148091590_148091862	-0.224417	5.0303e-07	2	1	3	PDZK1P1	0.797871	0.000467137	76634	-0.43	0.0016
chr1_148446685_148447167	-0.237755	2.66667e-07	2	3	5	LINC01138	1.41501	9.29235e-12	-72437	-0.46	0.00044
chr1_148475748_148476250	-0.19355	1.0303e-07	2	2	4	LINC01138	1.41501	9.29235e-12	-43354	-0.54	1.5e-05
chr1_149635403_149635683	-0.219955	0	2	3	5	LINC00869	0.652859	0.00049159	29069	-0.65	2.9e-08
chr1_149939567_149939923	-0.211742	8.30303e-07	1	5	6	SF3B4	1.37751	5.44931e-42	11223	-0.45	0.0026
chr1_150157104_150157798	-0.161387	2.42424e-08	1	2	3	ANP32E	0.561125	3.92439e-07	-78358	-0.55	1.6e-05
chr1_150157104_150157798	-0.161387	2.42424e-08	1	2	3	AC244033.2	0.81769	5.44397e-06	89403	-0.53	2.7e-05
chr1_150157104_150157798	-0.161387	2.42424e-08	1	2	3	VPS45	1.00784	3.96298e-28	89825	-0.63	1.6e-07
chr1_150387613_150387869	-0.20795	6.06061e-09	2	3	5	RPRD2	0.670527	1.19505e-08	24522	-0.46	0.00048
chr1_150409441_150410084	-0.214175	0	3	4	7	RPRD2	0.670527	1.19505e-08	46350	-0.51	7.2e-05
chr1_150409441_150410084	-0.214175	0	3	4	7	ECM1	-3.32177	6.68941e-35	-97978	0.71	0
chr1_150473173_150473490	-0.173442	4.24242e-08	1	3	4	ECM1	-3.32177	6.68941e-35	-34572	0.73	0
chr1_150600768_150600991	-0.170278	2.87879e-06	3	4	7	ECM1	-3.32177	6.68941e-35	92706	0.6	2.5e-06
chr1_150600768_150600991	-0.170278	2.87879e-06	3	4	7	GOLPH3L	0.96643	1.52873e-18	-96153	-0.42	0.0043
chr1_150613000_150613217	-0.197781	1.19394e-06	3	3	6	GOLPH3L	0.96643	1.52873e-18	-83927	-0.43	0.003
chr1_150891299_150891464	-0.164155	1.09697e-06	1	0	1	CERS2	0.647915	0.000619795	-83540	-0.54	2.4e-05
chr1_151012646_151013403	-0.20517	2.42424e-08	2	5	7	PRUNE1	0.872354	3.05256e-10	4226	-0.54	4.7e-05
chr1_151012646_151013403	-0.20517	2.42424e-08	2	5	7	C1orf56	0.590311	0.00053504	-34337	-0.61	1.2e-06
chr1_151012646_151013403	-0.20517	2.42424e-08	2	5	7	CERS2	0.647915	0.000619795	37642	-0.68	0
chr1_151012646_151013403	-0.20517	2.42424e-08	2	5	7	SETDB1	0.841083	2.99606e-12	86383	-0.42	0.0053
chr1_151569738_151570184	-0.211957	0	2	3	5	SNX27	0.859	1.01737e-14	-41822	-0.54	1.2e-05
chr1_151638625_151639145	-0.216885	6.06061e-09	2	2	4	SNX27	0.859	1.01737e-14	26619	-0.52	2.2e-05
chr1_151687820_151688114	-0.40103	1.45455e-07	0	1	1	SNX27	0.859	1.01737e-14	75814	-0.54	1.6e-05
chr1_151826239_151826348	0.206098	3.42424e-06	1	1	2	THEM5	1.60821	5.70606e-10	-27349	0.42	0.0057
chr1_151826239_151826348	0.206098	3.42424e-06	1	1	2	TDRKH	1.83964	3.2846e-36	34823	0.43	0.0043
chr1_151826239_151826348	0.206098	3.42424e-06	1	1	2	TDRKH-AS1	1.43058	9.90215e-08	35435	0.53	4.4e-05
chr1_151826239_151826348	0.206098	3.42424e-06	1	1	2	THEM4	0.832704	1.26249e-09	-83460	0.57	8.9e-06
chr1_153542982_153543860	-0.263018	4.12121e-07	0	2	2	CHTOP	0.556568	6.72226e-11	-90122	-0.42	0.0059
chr1_153569030_153570263	-0.195479	3.45455e-07	1	1	2	CHTOP	0.556568	6.72226e-11	-63719	-0.47	0.0012
chr1_153631244_153631599	-0.17705	3.57576e-07	2	5	7	CHTOP	0.556568	6.72226e-11	-2383	-0.49	0.00054
chr1_153888514_153888960	0.229972	3.51515e-07	2	2	4	AL358472.4	0.876348	5.25411e-05	-75401	0.44	0.0025
chr1_153894579_153894884	0.214273	6.06061e-09	0	1	1	DENND4B	0.51778	0.00050466	-51812	0.48	0.00079
chr1_153894579_153894884	0.214273	6.06061e-09	0	1	1	AL358472.4	0.876348	5.25411e-05	-69477	0.41	0.0082
chr1_154151710_154151962	-0.258331	0	0	2	2	TPM3	0.72143	4.55597e-15	-42686	-0.59	1.5e-06
chr1_154151710_154151962	-0.258331	0	0	2	2	UBAP2L	1.28888	1.89355e-28	-68217	-0.55	8.4e-06
chr1_154334019_154334246	-0.191139	0	3	3	6	ATP8B2	1.15056	6.0185e-05	8466	-0.37	0.0092
chr1_155300866_155301173	-0.215616	9.09091e-07	2	3	5	FDPS	1.20207	7.24429e-11	-7575	-0.62	7.8e-07
chr1_155300866_155301173	-0.215616	9.09091e-07	2	3	5	HCN3	1.11178	8.65607e-08	23283	-0.51	0.00021
chr1_155300866_155301173	-0.215616	9.09091e-07	2	3	5	SCAMP3	1.36092	2.53404e-30	38436	-0.48	0.00061
chr1_155300866_155301173	-0.215616	9.09091e-07	2	3	5	FAM189B	1.65379	1.24668e-34	45383	-0.51	0.0002
chr1_155300866_155301173	-0.215616	9.09091e-07	2	3	5	MTX1	0.575524	1.77771e-09	92167	-0.58	7.4e-06
chr1_155893989_155894239	-0.188795	8.84848e-07	2	2	4	RIT1	0.704569	1.83076e-09	-17165	-0.45	0.0006
chr1_155942765_155943282	-0.160128	1.75758e-07	1	1	2	KHDC4	0.733864	8.6734e-06	8365	-0.55	1.4e-05
chr1_155942765_155943282	-0.160128	1.75758e-07	1	1	2	RIT1	0.704569	1.83076e-09	31361	-0.62	3.8e-07
chr1_155942765_155943282	-0.160128	1.75758e-07	1	1	2	ARHGEF2	1.079	6.15644e-06	-63788	-0.41	0.0046
chr1_155942765_155943282	-0.160128	1.75758e-07	1	1	2	SSR2	1.00278	8.10424e-15	-77677	-0.57	5e-06
chr1_155987366_155987658	-0.176395	1.33333e-07	0	1	1	SSR2	1.00278	8.10424e-15	-33301	-0.44	0.0023
chr1_155987366_155987658	-0.176395	1.33333e-07	0	1	1	UBQLN4	0.937312	5.90352e-15	-66136	-0.47	0.00083
chr1_155987366_155987658	-0.176395	1.33333e-07	0	1	1	RIT1	0.704569	1.83076e-09	75962	-0.45	0.0014
chr1_156118347_156118510	-0.151437	2.55758e-06	2	2	4	UBQLN4	0.937312	5.90352e-15	64553	-0.41	0.0061
chr1_156126371_156126572	0.180551	1.70303e-06	3	5	8	SLC25A44	0.618209	0.000242347	-67360	0.43	0.0029
chr1_156126371_156126572	0.180551	1.70303e-06	3	5	8	UBQLN4	0.937312	5.90352e-15	72577	0.46	0.0011
chr1_156127127_156127406	0.202122	9.51515e-07	3	4	7	SLC25A44	0.618209	0.000242347	-66526	0.46	0.0011
chr1_156127127_156127406	0.202122	9.51515e-07	3	4	7	UBQLN4	0.937312	5.90352e-15	73333	0.5	0.00022
chr1_158184577_158185561	-0.23583	1.27273e-07	0	1	1	CD1D	-1.33971	6.98233e-07	4630	0.59	6.4e-07
chr1_159279734_159280242	-0.170241	8.48485e-08	1	1	2	FCER1A	-1.47584	9.25433e-05	-9472	0.45	0.00032
chr1_159846077_159846654	-0.231358	0	0	1	1	FCRL6	-1.59352	1.97069e-09	45566	0.48	0.00024
chr1_159846077_159846654	-0.231358	0	0	1	1	DUSP23	0.816556	0.000184004	65145	-0.6	8.5e-07
chr1_159859947_159860383	-0.228343	6.06061e-09	0	1	1	DUSP23	0.816556	0.000184004	79015	-0.49	0.00023
chr1_159888955_159889221	-0.3178	1.39394e-07	0	2	2	FCRL6	-1.59352	1.97069e-09	88444	0.53	2.8e-05
chr1_159896975_159897455	-0.182521	6.12121e-07	0	1	1	FCRL6	-1.59352	1.97069e-09	96464	0.42	0.0026
chr1_160056217_160056621	-0.267707	6.06061e-09	1	0	1	KCNJ10	-2.22124	1.75475e-07	-13862	0.61	4.8e-07
chr1_160056217_160056621	-0.267707	6.06061e-09	1	0	1	IGSF8	0.781195	0.000355193	-42322	-0.46	0.0004
chr1_160124711_160125186	-0.178145	9.39394e-07	0	2	2	IGSF8	0.781195	0.000355193	25768	-0.45	0.00085
chr1_160124711_160125186	-0.178145	9.39394e-07	0	2	2	KCNJ10	-2.22124	1.75475e-07	54228	0.62	2.9e-07
chr1_160124711_160125186	-0.178145	9.39394e-07	0	2	2	PEA15	1.30512	9.25586e-21	-80151	-0.48	0.00033
chr1_160498913_160499434	-0.255254	2.16364e-06	1	2	3	VANGL2	2.88324	5.12688e-08	98327	0.37	0.0069
chr1_160686395_160687310	-0.286623	1.33333e-07	1	1	2	CD48	-1.00225	0.00134432	-24541	0.42	0.0022
chr1_160687993_160688395	-0.279037	1.58788e-06	0	1	1	CD48	-1.00225	0.00134432	-23456	0.45	0.0006
chr1_160687993_160688395	-0.279037	1.58788e-06	0	1	1	SLAMF7	-0.745001	0.0297256	-50662	0.4	0.0033
chr1_160754028_160754492	-0.230848	1.33333e-07	0	1	1	LY9	-0.950241	0.00426358	-41582	0.43	0.0016
chr1_160754028_160754492	-0.230848	1.33333e-07	0	1	1	CD48	-1.00225	0.00134432	42177	0.4	0.0044
chr1_160799814_160799944	-0.196262	5.52727e-06	1	1	2	LY9	-0.950241	0.00426358	3740	0.41	0.0038
chr1_160799814_160799944	-0.196262	5.52727e-06	1	1	2	SLAMF7	-0.745001	0.0297256	60757	0.39	0.007
chr1_160799814_160799944	-0.196262	5.52727e-06	1	1	2	CD244	-2.69016	1.55849e-30	-62911	0.56	1e-05
chr1_160799814_160799944	-0.196262	5.52727e-06	1	1	2	CD48	-1.00225	0.00134432	87963	0.44	0.0011
chr1_160840347_160840717	-0.187335	2.01212e-06	0	1	1	CD244	-2.69016	1.55849e-30	-22138	0.51	7.6e-05
chr1_160840347_160840717	-0.187335	2.01212e-06	0	1	1	LY9	-0.950241	0.00426358	44273	0.38	0.0072
chr1_161188878_161189125	-0.193599	1.27273e-07	0	2	2	B4GALT3	0.921294	7.0828e-23	10910	-0.52	0.00013
chr1_161188878_161189125	-0.193599	1.27273e-07	0	2	2	PPOX	0.822385	4.19488e-11	22468	-0.49	0.0005
chr1_161189929_161190123	-0.196413	1.81818e-08	0	2	2	B4GALT3	0.921294	7.0828e-23	11961	-0.64	2.2e-07
chr1_161189929_161190123	-0.196413	1.81818e-08	0	2	2	PPOX	0.822385	4.19488e-11	23519	-0.58	7.8e-06
chr1_161628090_161628229	-0.18904	2.38788e-06	0	1	1	FCGR2B	-1.80906	1.04479e-06	-34918	0.43	0.0026
chr1_161664950_161665138	-0.226273	1.90303e-06	0	1	1	DUSP12	0.773156	1.17203e-11	-84620	-0.47	0.00053
chr1_162131128_162131296	-0.186359	0	1	3	4	NOS1AP	0.765776	0.000282631	61354	-0.6	2.1e-07
chr1_162136982_162137392	-0.167721	6.06061e-09	2	2	4	NOS1AP	0.765776	0.000282631	67208	-0.54	3.4e-06
chr1_162144912_162145388	-0.22767	4.84848e-08	3	0	3	NOS1AP	0.765776	0.000282631	75138	-0.6	2e-07
chr1_162152285_162153033	-0.167162	3.0303e-08	3	5	8	NOS1AP	0.765776	0.000282631	82511	-0.47	8.2e-05
chr1_163170802_163171133	-0.232645	1.43636e-06	2	1	3	NUF2	4.16442	9.50312e-62	-95443	-0.39	0.0026
chr1_163175080_163175590	-0.189614	6.06061e-09	1	1	2	NUF2	4.16442	9.50312e-62	-90986	-0.58	1.4e-06
chr1_165857033_165857846	-0.167107	3.0303e-08	3	4	7	TMCO1	0.843211	6.55226e-16	29278	-0.64	6e-08
chr1_165857033_165857846	-0.167107	3.0303e-08	3	4	7	UCK2	1.74789	3.44034e-30	29502	-0.63	1.2e-07
chr1_165911151_165911385	-0.196786	9.09091e-07	3	5	8	AL358115.1	1.18007	0.000984496	10468	-0.37	0.0066
chr1_165911151_165911385	-0.196786	9.09091e-07	3	5	8	TMCO1	0.843211	6.55226e-16	83396	-0.49	9.3e-05
chr1_165911151_165911385	-0.196786	9.09091e-07	3	5	8	UCK2	1.74789	3.44034e-30	83620	-0.42	0.0016
chr1_167539898_167540036	-0.160314	1.57576e-07	1	1	2	AL359962.2	1.0493	0.0102876	80007	-0.52	4.2e-05
chr1_167633757_167634271	-0.259347	6.9697e-07	1	2	3	MPZL1	1.32924	2.83452e-18	-86921	-0.41	0.0018
chr1_167635488_167635611	0.258957	7.39394e-07	0	2	2	MPZL1	1.32924	2.83452e-18	-85581	0.57	2.5e-06
chr1_167817047_167817620	-0.181076	3.87879e-07	2	1	3	MPZL1	1.32924	2.83452e-18	95855	-0.41	0.0013
chr1_168365133_168365533	-0.196794	3.0303e-08	0	1	1	TBX19	0.546783	0.017814	84093	-0.35	0.0038
chr1_168801495_168802091	-0.23326	0	3	4	7	DPT	-3.08768	2.71779e-09	72231	0.66	2.5e-09
chr1_171254943_171255265	-0.231647	0	0	1	1	FMO1	3.43228	8.12016e-12	6472	-0.53	4.7e-05
chr1_171254943_171255265	-0.231647	0	0	1	1	SRP14P4	-1.08988	0.00017165	-90042	0.43	0.0025
chr1_172449772_172450751	-0.203438	6.06061e-09	1	5	6	PIGC	1.22242	3.00784e-21	5686	-0.59	1.2e-06
chr1_172453297_172453700	-0.234037	1.36364e-06	2	1	3	PIGC	1.22242	3.00784e-21	9211	-0.38	0.0051
chr1_173917855_173918222	-0.2	3.27273e-07	2	3	5	CENPL	2.2777	2.05471e-54	93135	-0.4	0.0066
chr1_173917855_173918222	-0.2	3.27273e-07	2	3	5	DARS2	1.31174	2.96122e-20	93287	-0.46	0.0006
chr1_174938573_174938824	0.202251	3.30909e-06	0	2	2	CACYBP	0.913697	1.61598e-10	-60339	0.36	0.009
chr1_174953182_174954067	-0.174246	1.57576e-07	2	3	5	CACYBP	0.913697	1.61598e-10	-45096	-0.53	1.8e-05
chr1_177969090_177969329	-0.198668	3.63636e-08	0	1	1	SEC16B	-0.890718	0.00160852	-14974	-0.37	0.0088
chr1_179129478_179129736	-0.226173	1.57576e-06	1	4	5	TOR3A	0.962268	1.60246e-07	48101	-0.39	0.003
chr1_180246864_180247137	-0.197422	9.69697e-08	1	0	1	LHX4	1.81855	4.75879e-12	16578	-0.63	7e-08
chr1_180247485_180248017	-0.176884	1.44848e-06	1	0	1	LHX4	1.81855	4.75879e-12	17199	-0.64	3.6e-08
chr1_180270820_180271071	-0.215547	4.30303e-07	2	1	3	LHX4	1.81855	4.75879e-12	40534	-0.38	0.0018
chr1_182292285_182292555	-0.255922	2e-07	1	3	4	LINC01344	0.972547	0.0168992	-21506	-0.41	0.0015
chr1_183072440_183073056	-0.161439	1e-06	1	1	2	LAMC1	2.07807	1.47352e-22	48980	-0.5	5.4e-05
chr1_183583410_183583759	-0.164313	1.64242e-06	0	2	2	ARPC5	0.576356	0.000136213	-51998	-0.43	0.00099
chr1_183637875_183638447	-0.233047	9.69697e-08	0	2	2	ARPC5	0.576356	0.000136213	2118	-0.57	3.3e-06
chr1_184793039_184793335	-0.155927	7.93939e-07	2	3	5	EDEM3	0.730446	2.5693e-07	38126	-0.43	0.00032
chr1_184842048_184843205	-0.305208	2.18182e-07	1	0	1	EDEM3	0.730446	2.5693e-07	87135	-0.46	0.00013
chr1_184843884_184844110	-0.212623	0	1	1	2	EDEM3	0.730446	2.5693e-07	88971	-0.52	9.9e-06
chr1_200372602_200373560	-0.166321	3.93939e-07	2	3	5	LINC00862	0.872616	0.0106342	-27145	-0.47	0.00029
chr1_200373801_200374184	-0.169251	3.27879e-06	1	4	5	LINC00862	0.872616	0.0106342	-26521	-0.43	0.00099
chr1_201751808_201752292	-0.234088	0	0	1	1	IPO9	1.01759	4.08255e-24	-76849	-0.6	4e-07
chr1_201792833_201793039	-0.160728	2.7697e-06	0	2	2	IPO9	1.01759	4.08255e-24	-36102	-0.4	0.003
chr1_202749413_202749554	-0.201591	2.42424e-08	0	1	1	KDM5B	1.1649	7.3713e-11	-59916	-0.45	0.00034
chr1_202749413_202749554	-0.201591	2.42424e-08	0	1	1	PCAT6	1.50902	8.18142e-09	-61400	-0.35	0.0078
chr1_204088203_204088422	0.260136	0	1	3	4	SOX13	0.981128	8.51766e-08	15088	0.51	6e-05
chr1_204093114_204093622	-0.169956	4.08485e-06	3	5	8	SOX13	0.981128	8.51766e-08	19999	-0.55	9.6e-06
chr1_204282925_204283200	0.196315	0	0	2	2	REN	3.07705	2.24238e-10	92601	0.38	0.0085
chr1_205678919_205679323	0.279931	5.63636e-07	1	1	2	RAB29	0.731794	1.55463e-08	-96137	0.57	4.6e-06
chr1_206048520_206048906	-0.198429	6.66667e-08	2	3	5	BX571818.1	1.30127	0.00118577	13267	-0.44	0.00069
chr1_206511392_206512615	0.164814	2.72727e-07	1	3	4	IKBKE	1.12012	1.32683e-05	40916	0.39	0.0042
chr1_206538201_206538345	0.157685	4.54545e-07	0	2	2	IKBKE	1.12012	1.32683e-05	67725	0.43	0.002
chr1_206771639_206772041	-0.238001	1.0303e-07	1	1	2	MAPKAPK2	0.631857	1.09296e-06	86695	-0.56	3.2e-06
chr1_206783545_206784022	-0.220853	5.75758e-07	0	1	1	MAPKAPK2	0.631857	1.09296e-06	98601	-0.49	8.8e-05
chr1_207088845_207089640	-0.189986	0	2	3	5	PFKFB2	1.27163	1.05837e-14	54479	-0.51	0.0001
chr1_208240037_208240418	-0.166989	1.15758e-06	2	4	6	PLXNA2	0.531959	0.00884087	-3902	-0.38	0.0018
chr1_209764463_209764730	-0.173782	6.06061e-09	1	1	2	C1orf74	0.781803	2.8889e-08	-19829	-0.5	0.00016
chr1_209764463_209764730	-0.173782	6.06061e-09	1	1	2	UTP25	0.612563	1.25804e-07	-63277	-0.49	0.00026
chr1_209838494_209838974	-0.218235	3.81818e-07	2	3	5	UTP25	0.612563	1.25804e-07	10487	-0.45	0.00085
chr1_209838494_209838974	-0.218235	3.81818e-07	2	3	5	C1orf74	0.781803	2.8889e-08	53935	-0.61	4.2e-07
chr1_209838494_209838974	-0.218235	3.81818e-07	2	3	5	TRAF3IP3	-0.764707	0.0141858	82462	0.41	0.0034
chr1_218366934_218367263	-0.185712	3.63636e-08	1	2	3	RRP15	0.910007	1.32804e-16	81647	-0.46	0.0004
chr1_219088522_219089085	-0.17655	2.42424e-07	2	1	3	LYPLAL1-DT	0.971768	0.0019437	-84876	-0.36	0.0058
chr1_222522317_222522623	-0.240328	8.30303e-07	2	2	4	TAF1A	1.15612	1.29511e-16	-67310	-0.49	0.0002
chr1_222654870_222655168	0.184146	5.45455e-08	1	2	3	BROX	0.64841	4.55404e-11	-57385	0.52	5.2e-05
chr1_222654870_222655168	0.184146	5.45455e-08	1	2	3	AIDA	0.650906	1.97863e-09	-58042	0.57	7.2e-06
chr1_222654870_222655168	0.184146	5.45455e-08	1	2	3	TAF1A	1.15612	1.29511e-16	64937	0.53	4.2e-05
chr1_223133032_223133617	-0.213491	0	1	1	2	TLR5	1.09338	1.6813e-05	-9665	-0.38	0.0016
chr1_224456904_224457339	0.219479	1.81818e-08	2	4	6	CNIH3	0.527891	0.0204243	22244	0.5	5e-05
chr1_224459264_224459901	0.156952	0	0	3	3	CNIH3	0.527891	0.0204243	24604	0.46	0.00024
chr1_224919071_224919545	-0.273972	2.54545e-06	1	0	1	DNAH14	1.21834	1.99844e-15	22809	-0.46	0.00011
chr1_225456726_225457093	-0.197938	1.27273e-07	1	0	1	LBR	0.832243	8.08564e-09	27801	-0.58	7.3e-07
chr1_225825371_225825743	-0.180685	1.16364e-06	2	1	3	PYCR2	0.736782	1.52934e-11	-98597	-0.43	0.0022
chr1_226395782_226396111	0.168781	3.63636e-07	0	1	1	LIN9	1.87476	7.18287e-32	85913	0.5	4e-05
chr1_226397680_226397960	-0.225494	1.57576e-07	1	2	3	LIN9	1.87476	7.18287e-32	87811	-0.48	0.00012
chr1_226945546_226946229	-0.216939	1.57576e-07	3	5	8	PSEN2	0.569632	0.0115614	75362	-0.42	0.001
chr1_227748918_227749115	0.157855	5.45455e-08	0	1	1	JMJD4	0.722216	5.56543e-10	13507	0.49	7.2e-05
chr1_227756096_227756527	0.187001	6.06061e-09	0	2	2	JMJD4	0.722216	5.56543e-10	20685	0.59	7e-07
chr1_230697794_230698790	-0.290478	4.84848e-07	1	1	2	COG2	1.12733	5.63029e-29	55305	-0.54	8.8e-06
chr1_230702548_230702854	-0.205283	6.06061e-09	1	0	1	COG2	1.12733	5.63029e-29	60059	-0.56	2.6e-06
chr1_230708450_230709118	-0.204827	2.66667e-07	2	2	4	COG2	1.12733	5.63029e-29	65961	-0.55	6.6e-06
chr1_230729217_230729528	-0.190376	1.09091e-07	2	4	6	COG2	1.12733	5.63029e-29	86728	-0.56	3.4e-06
chr1_231577428_231577903	-0.17127	5.57576e-07	1	0	1	AL445524.1	1.56389	5.60399e-16	48872	-0.57	2.4e-06
chr1_231611804_231612160	-0.297588	1.33333e-07	1	2	3	AL445524.1	1.56389	5.60399e-16	83248	-0.6	7.2e-07
chr1_231627984_231628347	-0.251259	4.12121e-07	0	1	1	AL445524.1	1.56389	5.60399e-16	99428	-0.47	0.00022
chr1_234537992_234538494	-0.198571	1.27273e-07	3	5	8	IRF2BP2	0.581621	2.30353e-06	-71031	-0.51	7e-05
chr1_234643319_234643593	-0.167264	5.45455e-08	3	5	8	IRF2BP2	0.581621	2.30353e-06	33794	-0.48	0.0002
chr1_235104789_235105117	-0.266377	1.81818e-07	2	2	4	SNORA14B	1.31963	0.000298613	-22820	-0.5	0.00011
chr1_235104789_235105117	-0.266377	1.81818e-07	2	2	4	TOMM20	0.626885	1.24482e-05	-23819	-0.54	1.9e-05
chr1_235199583_235199815	0.15862	3.64242e-06	0	1	1	TOMM20	0.626885	1.24482e-05	70647	0.37	0.0092
chr1_235236958_235237523	-0.23169	2.42424e-08	2	1	3	GGPS1	0.758762	5.19107e-10	-89827	-0.53	3e-05
chr1_235236958_235237523	-0.23169	2.42424e-08	2	1	3	ARID4B	0.541996	7.58226e-06	-90696	-0.49	0.00023
chr1_235402220_235402769	-0.180754	4.84848e-08	3	2	5	GGPS1	0.758762	5.19107e-10	74870	-0.44	0.0012
chr1_236490289_236490629	-0.231547	2.06061e-07	2	3	5	LGALS8-AS1	0.888226	0.00160785	-33879	-0.46	0.00052
chr1_236490289_236490629	-0.231547	2.06061e-07	2	3	5	AL359921.2	0.759268	0.00199974	-46075	-0.5	8.8e-05
chr1_236494778_236495062	-0.231852	2.24242e-07	1	0	1	LGALS8-AS1	0.888226	0.00160785	-29446	-0.58	2.6e-06
chr1_236494778_236495062	-0.231852	2.24242e-07	1	0	1	AL359921.2	0.759268	0.00199974	-41642	-0.54	1.6e-05
chr1_236863140_236863553	-0.159552	6.66667e-08	3	4	7	MTR	0.87068	2.02542e-08	67859	-0.6	1.7e-07
chr1_240575677_240576040	-0.161698	1.27273e-07	0	3	3	GREM2	-1.89337	6.7059e-05	-36109	0.5	4.6e-05
chr1_241558328_241558529	-0.196356	0	2	4	6	KMO	-2.42257	5.25328e-20	26194	0.42	0.0019
chr1_241615340_241616123	-0.218989	4.24242e-08	3	4	7	OPN3	0.923576	4.90358e-05	-61253	-0.56	6e-06
chr1_241615340_241616123	-0.218989	4.24242e-08	3	4	7	KMO	-2.42257	5.25328e-20	83206	0.41	0.0038
chr1_244089771_244090066	-0.18829	1.09091e-07	2	4	6	ZBTB18	0.6266	2.73421e-05	40832	-0.42	0.0015
chr1_245167071_245167587	-0.284742	5.75758e-07	0	1	1	KIF26B	0.945297	0.021581	12086	0.37	0.0021
chr1_245176577_245177057	-0.307872	1.27273e-07	0	1	1	KIF26B	0.945297	0.021581	21592	0.34	0.0053
chr1_245182674_245183080	-0.291791	4.10303e-06	0	1	1	KIF26B	0.945297	0.021581	27689	0.36	0.0029
chr10_974134_974285	-0.181095	2.13333e-06	1	1	2	GTPBP4	0.967019	2.70854e-17	-13734	-0.45	0.0008
chr10_3809501_3809690	-0.151601	3.15152e-07	1	5	6	KLF6	-1.17702	4.13315e-11	24220	0.48	4.6e-05
chr10_5079724_5080351	-0.228645	0	3	0	3	AKR1C3	1.99256	5.61201e-18	44370	-0.72	0
chr10_5195607_5195918	-0.190054	5.45455e-08	2	3	5	LINC02561	3.80193	6.91921e-15	-75318	-0.43	0.0022
chr10_5284186_5284850	-0.183155	5.15152e-07	2	3	5	LINC02561	3.80193	6.91921e-15	12950	-0.64	4.1e-08
chr10_13078753_13079605	-0.212381	5.45455e-08	0	1	1	MCM10	3.81786	1.66683e-39	-81949	-0.6	9.5e-07
chr10_17380820_17381073	-0.175831	6.30303e-07	0	1	1	ST8SIA6	-3.16851	6.99687e-20	-73257	0.56	2.6e-06
chr10_26715186_26715585	-0.199134	3.27273e-07	0	1	1	PDSS1	0.948888	9.7377e-09	17527	-0.63	4.5e-08
chr10_27238919_27239374	-0.309713	1.21212e-06	1	0	1	MASTL	0.962029	6.11418e-13	84095	-0.37	0.0069
chr10_29659111_29659499	0.180147	6.84848e-07	2	3	5	SVIL	0.694255	0.000102435	-77282	0.39	0.0012
chr10_45711483_45711830	-0.186087	1.03636e-06	0	1	1	WASHC2C	0.513549	8.87014e-09	-15370	-0.42	0.0013
chr10_45715048_45715540	-0.238472	6.06061e-09	1	0	1	WASHC2C	0.513549	8.87014e-09	-11660	-0.62	2.1e-07
chr10_60670262_60670831	-0.243469	3.63636e-07	1	0	1	ANK3	-1.29572	0.000178093	-62659	0.59	2.7e-07
chr10_60713660_60713928	-0.24447	1.05455e-06	1	1	2	ANK3	-1.29572	0.000178093	-19562	0.64	2.8e-08
chr10_70091336_70092113	-0.258374	3.04242e-06	3	1	4	TYSND1	0.611437	5.8e-05	-54563	-0.51	8e-05
chr10_70351480_70351963	-0.211298	0	2	2	4	LRRC20	0.826223	2.17981e-05	-30687	-0.6	3.8e-07
chr10_72955211_72955741	-0.194017	1.15152e-06	2	3	5	OIT3	-3.65945	4.05627e-58	61630	0.49	0.00013
chr10_79076557_79076729	-0.173721	1.0303e-07	3	3	6	ZMIZ1-AS1	0.969795	0.000796584	8662	-0.53	1.5e-05
chr10_79112700_79113440	0.225676	4.60606e-07	1	3	4	ZMIZ1-AS1	0.969795	0.000796584	44805	0.35	0.0092
chr10_84178683_84179588	-0.215794	1.09091e-07	0	1	1	CDHR1	-2.05912	2.30772e-12	-15047	0.48	0.00026
chr10_92847667_92848011	-0.195154	4.84848e-08	1	1	2	EXOC6	0.55849	7.61444e-05	12954	-0.47	8.6e-05
chr10_95538407_95538665	0.173715	4.12121e-07	1	4	5	SORBS1	-0.815224	1.49006e-05	-22749	-0.33	0.0064
chr10_97401752_97401789	-0.20593	3.27273e-07	1	1	2	RRP12	0.730185	0.00049115	-24287	-0.45	0.0018
chr10_100352416_100352547	-0.180148	5.09697e-06	1	0	1	SCD	1.11842	0.00357352	5292	-0.61	7e-07
chr10_100355082_100355486	-0.168649	6.36364e-07	1	0	1	SCD	1.11842	0.00357352	7958	-0.52	6.5e-05
chr10_127866218_127866509	-0.21722	5.45455e-08	0	1	1	CLRN3	-2.07097	4.60059e-07	-26438	0.37	0.0081
chr10_127879290_127879450	-0.224398	7.09091e-07	0	1	1	CLRN3	-2.07097	4.60059e-07	-13497	0.59	7.8e-07
chr10_127879936_127880301	-0.154888	5.34545e-06	1	1	2	CLRN3	-2.07097	4.60059e-07	-12646	0.54	1e-05
chr10_127887816_127888007	-0.21132	3.81818e-07	0	1	1	CLRN3	-2.07097	4.60059e-07	-4940	0.5	9e-05
chr10_127889313_127889580	-0.223933	3.15152e-07	1	3	4	CLRN3	-2.07097	4.60059e-07	-3367	0.45	0.0006
chr10_127922446_127922899	-0.215533	4.64848e-06	0	1	1	CLRN3	-2.07097	4.60059e-07	29499	0.39	0.0045
chr10_127926409_127926722	-0.246078	7.21212e-07	0	1	1	CLRN3	-2.07097	4.60059e-07	33462	0.46	0.00036
chr10_127927714_127928398	-0.209846	1.27273e-07	0	1	1	CLRN3	-2.07097	4.60059e-07	34767	0.44	0.00069
chr10_127944725_127945294	-0.235369	0	1	0	1	CLRN3	-2.07097	4.60059e-07	51778	0.51	4.2e-05
chr10_132449341_132449983	-0.213964	0	0	1	1	PWWP2B	0.699983	0.000231257	52173	-0.49	7.6e-05
chr10_133512862_133513480	-0.195317	2.42424e-08	0	2	2	AL161645.1	-1.39163	0.0056702	-14033	0.41	0.0027
chr11_581282_581738	0.166775	1.33939e-06	0	1	1	HRAS	0.667727	3.46447e-09	43995	0.49	0.00052
chr11_616382_616517	-0.170228	2.89697e-06	0	2	2	DEAF1	0.767425	1.55033e-11	-90198	-0.49	0.00048
chr11_755883_756041	0.179327	0	0	1	1	CD151	0.618574	0.000154482	-76802	0.66	6.5e-08
chr11_781327_782767	-0.2135	3.63636e-07	0	1	1	DEAF1	0.767425	1.55033e-11	74612	-0.53	0.00013
chr11_1927635_1927748	-0.269309	1.67879e-06	0	1	1	H19	1.31494	0.0160514	-73722	0.4	0.0059
chr11_1928499_1933186	-0.312574	1.27273e-07	0	1	1	H19	1.31494	0.0160514	-68284	0.43	0.0024
chr11_3915420_3915692	-0.321443	1.27273e-07	2	3	5	AC090587.1	0.781	0.00564557	59911	-0.46	0.00075
chr11_3915420_3915692	-0.321443	1.27273e-07	2	3	5	STIM1	0.544149	0.00108415	60893	-0.42	0.0026
chr11_8867956_8868189	-0.185188	1.27273e-07	1	1	2	AKIP1	0.866397	1.80738e-21	-42950	-0.51	5.2e-05
chr11_10669310_10669994	-0.21044	0	1	2	3	CTR9	0.631505	9.323e-05	-80993	-0.6	6.3e-07
chr11_10673794_10674640	-0.198754	2.06061e-07	0	1	1	CTR9	0.631505	9.323e-05	-76347	-0.52	2.8e-05
chr11_41377283_41378074	-0.197477	0	1	4	5	LRRC4C	-1.72179	4.46002e-05	-81699	0.76	7.9e-14
chr11_41437709_41438016	-0.228554	2.42424e-08	1	0	1	LRRC4C	-1.72179	4.46002e-05	-21757	0.53	3.7e-06
chr11_43868480_43869039	-0.18887	5.45455e-08	1	4	5	C11orf96	-1.65587	1.55113e-07	-73466	0.46	0.00052
chr11_46342952_46343822	-0.159749	3.55758e-06	0	2	2	MDK	4.14381	1.14037e-54	-36934	-0.42	0.0022
chr11_46519148_46519401	-0.183694	7.15152e-07	3	4	7	HARBI1	0.588267	1.21698e-05	-98508	-0.42	0.0024
chr11_46519657_46520139	-0.208446	5.45455e-08	2	3	5	HARBI1	0.588267	1.21698e-05	-97770	-0.43	0.0015
chr11_46557700_46558012	-0.201378	7.21212e-07	1	1	2	HARBI1	0.588267	1.21698e-05	-59897	-0.5	0.0001
chr11_46611427_46611705	-0.184833	2.66667e-07	1	0	1	HARBI1	0.588267	1.21698e-05	-6204	-0.44	0.0014
chr11_57400448_57400780	-0.221153	3.0303e-08	1	0	1	SSRP1	0.684614	5.92793e-11	64571	-0.5	0.0002
chr11_60978659_60979062	-0.297394	2.06061e-07	0	1	1	TMEM132A	2.32344	6.13482e-13	54196	-0.42	0.0032
chr11_60983118_60983373	-0.266675	7.39394e-07	0	1	1	TMEM132A	2.32344	6.13482e-13	58655	-0.41	0.0044
chr11_60983616_60984823	-0.255984	6.66667e-08	1	2	3	TMEM132A	2.32344	6.13482e-13	59153	-0.42	0.0031
chr11_60987725_60988883	-0.272426	1.27273e-07	1	1	2	TMEM132A	2.32344	6.13482e-13	63262	-0.48	0.00038
chr11_61106614_61107319	-0.223317	2.72727e-07	1	0	1	VPS37C	0.60883	2.51118e-08	-54298	-0.4	0.0029
chr11_61111337_61111988	-0.245059	5.09091e-07	0	1	1	VPS37C	0.60883	2.51118e-08	-49629	-0.4	0.0027
chr11_61335627_61335880	0.157329	2.48485e-06	0	2	2	TKFC	-1.37114	3.2494e-05	2417	-0.65	6.7e-08
chr11_61353533_61353868	0.164719	1.74545e-06	0	1	1	TKFC	-1.37114	3.2494e-05	20323	-0.65	6.8e-08
chr11_61961992_61962328	-0.169016	1.33333e-07	2	5	7	FTH1	0.972594	4.69557e-06	-5332	-0.64	1.1e-07
chr11_61961992_61962328	-0.169016	1.33333e-07	2	5	7	FADS3	0.603894	0.000147705	69941	-0.51	0.0001
chr11_61963865_61964011	-0.176991	5.09091e-07	2	4	6	FTH1	0.972594	4.69557e-06	-3649	-0.56	9.5e-06
chr11_61963865_61964011	-0.176991	5.09091e-07	2	4	6	FADS3	0.603894	0.000147705	71814	-0.4	0.0044
chr11_62539663_62539933	0.231798	1.69697e-07	1	3	4	B3GAT3	0.593737	5.43915e-07	-82242	0.48	0.00053
chr11_62672628_62673166	-0.185145	6.06061e-08	0	1	1	B3GAT3	0.593737	5.43915e-07	50453	-0.52	0.00025
chr11_62714016_62714367	-0.160499	1.27273e-07	2	3	5	B3GAT3	0.593737	5.43915e-07	91841	-0.44	0.0048
chr11_63762223_63762627	-0.312547	4.84848e-07	1	1	2	SPINDOC	1.27196	1.23823e-10	-50761	-0.47	0.00044
chr11_63762223_63762627	-0.312547	4.84848e-07	1	1	2	RTN3	0.502941	0.000107677	80777	-0.54	3.1e-05
chr11_64863773_64864165	0.216565	1.01212e-06	1	4	5	MAP4K2	0.575131	0.000443785	60532	0.48	0.00044
chr11_64875235_64875671	0.205171	3.0303e-08	0	2	2	MAP4K2	0.575131	0.000443785	71994	0.51	0.00013
chr11_65023784_65024203	-0.198514	6.06061e-09	1	0	1	ARL2	0.804551	1.20965e-05	9671	-0.42	0.007
chr11_65023784_65024203	-0.198514	6.06061e-09	1	0	1	CDCA5	3.41285	6.1866e-54	-59961	-0.59	5.2e-06
chr11_65024819_65025076	-0.159755	3.97576e-06	2	0	2	CDCA5	3.41285	6.1866e-54	-59088	-0.43	0.0063
chr11_65024819_65025076	-0.159755	3.97576e-06	2	0	2	AP003068.4	2.65332	1.96708e-08	-93234	-0.42	0.0058
chr11_65069140_65069693	-0.16287	2.42424e-08	2	1	3	CDCA5	3.41285	6.1866e-54	-14471	-0.63	4.5e-07
chr11_65069140_65069693	-0.16287	2.42424e-08	2	1	3	ARL2	0.804551	1.20965e-05	55027	-0.45	0.0027
chr11_66285385_66285833	0.19501	5.93939e-07	0	1	1	CNIH2	0.76491	0.00631404	7195	0.45	0.0027
chr11_66285385_66285833	0.19501	5.93939e-07	0	1	1	KLC2	1.15023	2.80588e-10	28091	0.52	0.00011
chr11_66285385_66285833	0.19501	5.93939e-07	0	1	1	AP000759.1	0.639058	0.00183517	39146	0.44	0.0027
chr11_66717972_66718255	0.17688	1.4303e-06	0	1	1	SPTBN2	-1.98662	7.16028e-10	-10971	-0.59	1.8e-06
chr11_69443382_69443709	0.365832	2.24242e-07	1	4	5	LINC01488	-5.91847	3.66524e-26	-37953	-0.45	0.00016
chr11_72791528_72791896	0.171127	1.21212e-08	0	3	3	STARD10	-0.690692	0.00648207	-1785	-0.4	0.0038
chr11_75518731_75519090	-0.1611	1.4e-06	0	1	1	SERPINH1	1.36221	5.91825e-10	-42966	-0.44	0.00052
chr11_75720236_75720378	0.27461	1.27273e-07	1	0	1	MOGAT2	-2.63625	6.51738e-09	2417	-0.8	0
chr11_78177744_78178054	-0.22339	1.51515e-07	0	1	1	ALG8	0.597832	1.12417e-06	38084	-0.57	4.8e-06
chr11_114172566_114172995	0.210313	1.27273e-07	2	4	6	NNMT	-2.41989	2.5401e-08	-84792	-0.48	6.7e-05
chr11_114277797_114278137	-0.177462	6.54545e-07	2	4	6	NNMT	-2.41989	2.5401e-08	20010	0.49	4.4e-05
chr11_115498297_115498780	-0.273517	8.90909e-07	1	1	2	CADM1	0.603767	0.00605554	-6177	-0.53	1.2e-05
chr11_116856717_116856875	0.151124	1.81818e-08	0	1	1	APOA1	-2.09414	1.78424e-10	18767	-0.5	0.00016
chr11_116856717_116856875	0.151124	1.81818e-08	0	1	1	AP006216.2	-2.31537	1.43354e-09	42714	-0.54	2.4e-05
chr11_116856717_116856875	0.151124	1.81818e-08	0	1	1	APOA5	-2.26193	2.1689e-09	64297	-0.55	2.2e-05
chr11_116856717_116856875	0.151124	1.81818e-08	0	1	1	ZPR1	0.516505	4.37483e-06	68667	0.59	2.3e-06
chr11_117842340_117843154	-0.254545	1.18788e-06	0	1	1	TMPRSS13	-1.40388	2.17656e-06	-86305	0.38	0.006
chr11_117851069_117852027	-0.234723	2.42424e-08	0	1	1	TMPRSS13	-1.40388	2.17656e-06	-77432	0.45	0.00068
chr11_118005820_118006235	-0.261206	0	1	2	3	TMPRSS4	-1.33197	0.00779177	-70777	0.43	0.0012
chr11_118005820_118006235	-0.261206	0	1	2	3	TMPRSS13	-1.40388	2.17656e-06	76361	0.37	0.0075
chr11_118013067_118013792	-0.246539	6.06061e-08	1	1	2	TMPRSS13	-1.40388	2.17656e-06	83608	0.41	0.0024
chr11_119020505_119020691	-0.153822	7.21212e-07	0	1	1	AP003392.4	1.27688	4.16345e-05	22501	-0.47	0.0015
chr11_119020505_119020691	-0.153822	7.21212e-07	0	1	1	DPAGT1	0.644323	1.20718e-05	-87640	-0.58	1e-05
chr11_119023033_119023313	-0.202446	3.07879e-06	2	3	5	DPAGT1	0.644323	1.20718e-05	-85018	-0.5	0.0006
chr11_119664394_119664582	-0.179432	1.27273e-07	1	0	1	NECTIN1	1.37733	3.73711e-11	-64502	-0.56	1.3e-06
chr11_122746868_122747285	-0.273818	1.33333e-07	1	2	3	CRTAM	-0.838892	0.0236868	-91215	0.47	0.00016
chr11_122747556_122747712	-0.241201	5.37576e-06	0	2	2	CRTAM	-0.838892	0.0236868	-90788	0.42	0.0012
chr11_122766268_122767688	-0.254175	6.06061e-08	1	0	1	CRTAM	-0.838892	0.0236868	-70812	0.48	4.8e-05
chr11_122784771_122785606	-0.293494	9.69697e-07	0	1	1	CRTAM	-0.838892	0.0236868	-52894	0.4	0.002
chr11_122785864_122786651	-0.309599	4.72727e-07	0	1	1	CRTAM	-0.838892	0.0236868	-51849	0.38	0.0034
chr11_128528945_128529050	-0.218395	4.99394e-06	0	2	2	ETS1	-0.792958	0.000483067	-58508	0.42	0.00054
chr11_128546451_128546870	-0.18099	6.54545e-07	0	2	2	ETS1	-0.792958	0.000483067	-40688	0.34	0.0049
chr11_128579389_128579635	-0.293993	5.40606e-06	0	1	1	ETS1	-0.792958	0.000483067	-7923	0.45	0.0002
chr11_128703490_128704003	-0.285444	4.84848e-07	1	2	3	AP001122.1	2.56434	3.91301e-07	16568	-0.38	0.0051
chr11_128725842_128726555	-0.199124	8.48485e-08	1	3	4	AP001122.1	2.56434	3.91301e-07	38920	-0.41	0.0019
chr11_128731729_128731989	-0.278132	2.12121e-07	1	2	3	AP001122.1	2.56434	3.91301e-07	44807	-0.39	0.0036
chr11_128839971_128840348	-0.237279	2.24242e-07	0	2	2	KCNJ5	2.08792	2.1157e-13	-51008	-0.39	0.0026
chr11_128842385_128842830	-0.185466	2.52727e-06	0	2	2	KCNJ5	2.08792	2.1157e-13	-48526	-0.35	0.0074
chr11_128851694_128851973	-0.17172	1.32121e-06	0	2	2	KCNJ5	2.08792	2.1157e-13	-39383	-0.37	0.0044
chr11_134407333_134408639	-0.211524	5.15152e-07	0	1	1	B3GAT1	-1.46736	0.0036485	-3279	0.4	0.0033
chr12_99899_100201	-0.211759	8.9697e-07	0	1	1	AC026369.3	-3.84482	3.20464e-24	-11649	0.73	2.3e-11
chr12_6067562_6067753	0.210524	6.12121e-07	0	1	1	VWF	1.95422	1.2614e-12	-57017	0.54	4.4e-06
chr12_6379140_6379310	0.178063	6.06061e-08	0	3	3	PLEKHG6	1.11	0.0001898	68704	0.46	0.0013
chr12_6772113_6772463	0.177571	1.24242e-06	0	3	3	USP5	0.547587	1.94098e-05	-79665	0.46	0.0017
chr12_6773397_6773937	0.189407	9.33333e-07	0	1	1	USP5	0.547587	1.94098e-05	-78191	0.45	0.0024
chr12_6773397_6773937	0.189407	9.33333e-07	0	1	1	ZNF384	0.656164	2.17485e-06	83825	0.44	0.0036
chr12_6773397_6773937	0.189407	9.33333e-07	0	1	1	RPL13P5	1.34999	2.26937e-10	-99452	0.43	0.0052
chr12_6881195_6881545	-0.201751	5.21212e-07	1	2	3	DSTNP2	0.904815	1.21194e-10	-3137	-0.42	0.0091
chr12_6881195_6881545	-0.201751	5.21212e-07	1	2	3	RPL13P5	1.34999	2.26937e-10	7806	-0.43	0.0061
chr12_6881195_6881545	-0.201751	5.21212e-07	1	2	3	SPSB2	0.902309	1.19291e-08	-7813	-0.48	0.001
chr12_6881195_6881545	-0.201751	5.21212e-07	1	2	3	CDCA3	3.11294	2.82733e-40	29129	-0.5	0.00057
chr12_6881195_6881545	-0.201751	5.21212e-07	1	2	3	GPR162	-0.925036	0.00247446	59650	0.45	0.0034
chr12_6981503_6981868	-0.214779	6.06061e-08	1	3	4	SPSB2	0.902309	1.19291e-08	92145	-0.41	0.0079
chr12_6981503_6981868	-0.214779	6.06061e-08	1	3	4	DSTNP2	0.904815	1.21194e-10	96821	-0.41	0.0097
chr12_7080810_7081578	0.169489	6.48485e-07	2	3	5	RBP5	-1.10701	0.000117619	-47364	-0.44	0.0029
chr12_7143561_7143745	0.167018	1.81818e-08	0	1	1	RBP5	-1.10701	0.000117619	14619	-0.43	0.0028
chr12_7155412_7155993	0.233744	2.78788e-07	0	1	1	RBP5	-1.10701	0.000117619	26470	-0.4	0.0078
chr12_8993413_8993643	-0.238538	1.60606e-06	0	1	1	KLRG1	-1.2242	1.10892e-06	43369	0.39	0.0056
chr12_8995768_8996156	-0.29982	4.61818e-06	0	1	1	KLRG1	-1.2242	1.10892e-06	45724	0.63	1.6e-07
chr12_8995768_8996156	-0.29982	4.61818e-06	0	1	1	A2M-AS1	-1.14179	4.20313e-05	-69021	0.37	0.0088
chr12_9029809_9029950	-0.215624	7.21212e-07	0	1	1	KLRG1	-1.2242	1.10892e-06	79765	0.47	0.00048
chr12_9029809_9029950	-0.215624	7.21212e-07	0	1	1	A2M	-1.59128	3.0179e-07	-86279	0.5	0.00015
chr12_9066254_9066648	0.235767	0	0	2	2	A2M	-1.59128	3.0179e-07	-49581	-0.45	0.00064
chr12_9731562_9731841	-0.207151	5.4e-06	0	1	1	KLRF1	-2.75103	2.80641e-36	-95640	0.58	3.6e-06
chr12_9732418_9732698	-0.207678	6.32727e-06	0	2	2	KLRF1	-2.75103	2.80641e-36	-94783	0.55	2.4e-05
chr12_9756749_9757027	-0.20675	1.80606e-06	2	1	3	KLRF1	-2.75103	2.80641e-36	-70454	0.53	5e-05
chr12_9862964_9863454	-0.180013	5.15152e-07	0	1	1	CLEC2B	-0.857908	0.00399025	-6682	0.42	0.0023
chr12_9862964_9863454	-0.180013	5.15152e-07	0	1	1	KLRF1	-2.75103	2.80641e-36	35483	0.58	2.3e-06
chr12_9888272_9888570	-0.186685	0	0	1	1	KLRF1	-2.75103	2.80641e-36	60791	0.63	1.3e-07
chr12_9890179_9890777	-0.184342	9.09091e-08	0	1	1	KLRF1	-2.75103	2.80641e-36	62698	0.69	0
chr12_10244330_10245409	-0.196714	0	0	2	2	KLRD1	-1.90251	1.05181e-14	18272	0.49	9.9e-05
chr12_10244330_10245409	-0.196714	0	0	2	2	GABARAPL1	-1.34015	1.49053e-09	31872	0.45	0.00054
chr12_12610998_12611399	-0.172105	0	1	1	2	GPR19	2.6374	2.9919e-16	-84808	-0.52	3.8e-05
chr12_18242562_18242978	-0.160496	1.0303e-07	1	2	3	RERGL	-1.60533	3.35692e-05	-77129	0.49	6.2e-05
chr12_24901159_24901555	-0.216832	2.7697e-06	1	2	3	BCAT1	1.99349	2.05884e-12	-47904	-0.37	0.0024
chr12_31369975_31370332	0.154563	6.66667e-08	1	0	1	SINHCAF	0.713815	0.00078276	42917	0.55	9.3e-06
chr12_40226689_40227079	0.15355	5.58182e-06	1	1	2	LRRK2	-1.27779	2.27573e-09	29945	-0.52	2.4e-05
chr12_42569847_42570118	-0.208752	7.04848e-06	0	1	1	PRICKLE1	-1.04066	0.00606474	-20237	0.47	6.9e-05
chr12_42572759_42573825	-0.277577	2.06061e-07	0	1	1	PRICKLE1	-1.04066	0.00606474	-16530	0.39	0.0012
chr12_42575402_42575743	-0.24989	7.27273e-08	0	1	1	PRICKLE1	-1.04066	0.00606474	-14612	0.34	0.0057
chr12_46617868_46618142	-0.197091	9.69697e-07	1	0	1	AC008035.1	-1.36852	2.55287e-07	80366	0.44	0.00023
chr12_47812765_47813368	0.343453	6.36364e-07	2	1	3	SLC48A1	0.659919	2.25118e-06	58849	0.47	0.00059
chr12_47900464_47900840	-0.18474	1.24242e-06	1	0	1	TMEM106C	1.72105	2.17484e-20	-62729	-0.55	1.2e-05
chr12_48200562_48200836	-0.204252	1.91515e-06	0	1	1	SENP1	0.866422	1.10241e-18	94254	-0.38	0.0075
chr12_48907201_48907422	-0.165123	3.19394e-06	1	0	1	FKBP11	1.09993	1.30987e-08	-19052	-0.41	0.0062
chr12_49202311_49202688	-0.239672	0	1	2	3	TUBA1B	1.5477	3.56853e-21	70914	-0.56	9.8e-06
chr12_49265753_49266153	-0.236538	0	0	1	1	TROAP	3.68201	6.32396e-42	-57083	-0.6	1.3e-06
chr12_49267041_49267442	-0.201611	5.45455e-08	0	3	3	TROAP	3.68201	6.32396e-42	-55794	-0.6	1.2e-06
chr12_49267041_49267442	-0.201611	5.45455e-08	0	3	3	SPATS2	1.74509	2.72819e-45	-99142	-0.59	2e-06
chr12_53014153_53014203	0.153926	1.98788e-06	0	2	2	SPRYD3	0.671306	5.10714e-06	-65217	0.45	0.0019
chr12_54307893_54308387	-0.22391	1.81818e-07	1	0	1	HNRNPA1	0.758821	4.90206e-08	27700	-0.48	0.00046
chr12_54307893_54308387	-0.22391	1.81818e-07	1	0	1	CBX5	0.735724	3.3499e-06	27760	-0.44	0.0016
chr12_54363325_54363833	-0.249037	2.42424e-08	0	1	1	ITGA5	1.19184	3.86832e-08	-55627	-0.42	0.0036
chr12_54363325_54363833	-0.249037	2.42424e-08	0	1	1	NFE2	-1.21831	0.00140467	62204	0.4	0.0066
chr12_54363325_54363833	-0.249037	2.42424e-08	0	1	1	HNRNPA1	0.758821	4.90206e-08	83132	-0.42	0.0034
chr12_54363325_54363833	-0.249037	2.42424e-08	0	1	1	CBX5	0.735724	3.3499e-06	83192	-0.41	0.0055
chr12_56006545_56006911	-0.193233	2.42424e-08	1	1	2	ERBB3	0.840972	3.06041e-05	-69888	-0.56	1.8e-05
chr12_56006545_56006911	-0.193233	2.42424e-08	1	1	2	PA2G4	0.606048	9.05586e-09	-97408	-0.57	1e-05
chr12_56015115_56015221	-0.238232	1.17576e-06	0	1	1	ERBB3	0.840972	3.06041e-05	-61578	-0.54	4.2e-05
chr12_56337729_56338042	-0.236227	2.42424e-08	0	2	2	APOF	-3.10496	4.96485e-13	-24781	0.47	0.0012
chr12_56337729_56338042	-0.236227	2.42424e-08	0	2	2	ANKRD52	1.21072	1.83235e-14	79338	-0.45	0.0019
chr12_56570264_56570819	-0.178571	2.24242e-07	0	3	3	BAZ2A	0.633359	1.83182e-05	-65997	-0.43	0.0019
chr12_56672225_56672524	-0.172612	2.29697e-06	2	2	4	PRIM1	1.49018	2.89217e-16	-79849	-0.48	0.00057
chr12_56685431_56686203	-0.194178	1.33333e-07	1	0	1	BAZ2A	0.633359	1.83182e-05	48615	-0.43	0.0032
chr12_56685431_56686203	-0.194178	1.33333e-07	1	0	1	PRIM1	1.49018	2.89217e-16	-66170	-0.63	4e-07
chr12_56768615_56768781	-0.208648	5.15152e-07	2	4	6	PRIM1	1.49018	2.89217e-16	16242	-0.57	6.7e-06
chr12_56782642_56783136	-0.162263	1.51515e-07	0	1	1	PRIM1	1.49018	2.89217e-16	30269	-0.64	7.8e-08
chr12_56954931_56955087	0.164697	1.55152e-06	1	0	1	MYO1A	3.49953	1.20212e-19	-96111	0.48	0.00019
chr12_57067521_57067838	0.232553	1.15152e-07	0	1	1	MYO1A	3.49953	1.20212e-19	16323	0.5	0.00024
chr12_57067521_57067838	0.232553	1.15152e-07	0	1	1	NEMP1	1.1532	2.29412e-14	-20225	0.47	0.00069
chr12_57090809_57091333	0.178547	6.06061e-09	0	1	1	NEMP1	1.1532	2.29412e-14	2746	0.61	7.2e-07
chr12_57090809_57091333	0.178547	6.06061e-09	0	1	1	MYO1A	3.49953	1.20212e-19	39611	0.56	1.4e-05
chr12_57136289_57136475	0.210365	2.97576e-06	1	4	5	NEMP1	1.1532	2.29412e-14	48226	0.6	1.4e-06
chr12_57136289_57136475	0.210365	2.97576e-06	1	4	5	NXPH4	5.24254	3.02333e-27	-80320	0.51	9.9e-05
chr12_57136289_57136475	0.210365	2.97576e-06	1	4	5	MYO1A	3.49953	1.20212e-19	85091	0.51	0.00012
chr12_57232369_57232564	0.172006	5.55152e-06	1	0	1	NDUFA4L2	2.29836	1.38782e-30	-8151	0.4	0.0052
chr12_57232369_57232564	0.172006	5.55152e-06	1	0	1	NXPH4	5.24254	3.02333e-27	15574	0.4	0.0047
chr12_57245395_57245884	-0.164894	3.32727e-06	2	0	2	NDUFA4L2	2.29836	1.38782e-30	4680	-0.5	0.00014
chr12_57245395_57245884	-0.164894	3.32727e-06	2	0	2	NXPH4	5.24254	3.02333e-27	28600	-0.46	0.00052
chr12_57451496_57451606	-0.196127	0	3	4	7	ARHGAP9	-0.935051	0.00123643	-37208	0.51	0.0002
chr12_57451496_57451606	-0.196127	0	3	4	7	DDIT3	0.801184	0.000460127	-70131	-0.41	0.008
chr12_57479112_57479526	-0.240289	1.15152e-07	1	2	3	DDIT3	0.801184	0.000460127	-42211	-0.42	0.0064
chr12_57480097_57480665	-0.265837	6.06061e-09	1	2	3	DDIT3	0.801184	0.000460127	-41072	-0.45	0.002
chr12_57481147_57481668	-0.244717	2.42424e-08	1	1	2	DDIT3	0.801184	0.000460127	-40069	-0.56	1.9e-05
chr12_67710258_67710700	-0.215791	2.42424e-08	1	1	2	DYRK2	0.770059	1.50005e-08	61920	-0.39	0.0013
chr12_89452240_89452460	0.158147	4.60606e-07	1	3	4	DUSP6	-0.834303	0.000488332	98969	-0.4	0.0044
chr12_91161553_91162234	-0.287781	2.24242e-07	0	1	1	DCN	-2.45699	1.53438e-08	-20889	0.63	4.8e-08
chr12_99959153_99959356	-0.16126	6.46667e-06	1	1	2	AC126474.1	0.908546	2.56285e-05	-68184	-0.38	0.0051
chr12_100497215_100497708	0.166173	0	0	3	3	GAS2L3	1.53295	2.38801e-12	-75975	0.59	7e-07
chr12_101734658_101734842	0.206615	3.33333e-07	0	2	2	GNPTAB	0.522437	0.000181453	-96096	0.51	7e-05
chr12_102054448_102055056	-0.187371	1.00606e-06	1	0	1	NUP37	1.08776	1.34137e-17	-65068	-0.62	3.3e-07
chr12_102054448_102055056	-0.187371	1.00606e-06	1	0	1	PARPBP	2.99209	2.1349e-46	-65129	-0.6	1e-06
chr12_103672757_103672879	-0.181054	4.47879e-06	1	1	2	STAB2	-5.76282	1.8205e-57	85484	0.64	4e-08
chr12_106245617_106245756	-0.226179	1.30303e-06	0	1	1	CKAP4	1.49077	2.02316e-15	-58523	-0.52	3.3e-05
chr12_106274193_106274754	-0.183395	2.55152e-06	3	5	8	CKAP4	1.49077	2.02316e-15	-29525	-0.46	0.00052
chr12_106281736_106282049	-0.222037	0	2	5	7	CKAP4	1.49077	2.02316e-15	-22230	-0.61	3.6e-07
chr12_106282268_106282551	-0.223515	0	2	5	7	CKAP4	1.49077	2.02316e-15	-21728	-0.58	2.6e-06
chr12_106283090_106283697	-0.157879	3.63636e-08	1	1	2	CKAP4	1.49077	2.02316e-15	-20582	-0.49	0.00014
chr12_106288520_106288880	-0.209676	1.81818e-07	3	2	5	CKAP4	1.49077	2.02316e-15	-15399	-0.59	1.6e-06
chr12_109953056_109953298	0.161374	4.84848e-08	0	3	3	TCHP	0.828919	2.16519e-09	52792	0.46	0.00088
chr12_111782808_111783348	0.213698	0	0	1	1	ALDH2	-2.11417	1.19865e-18	15921	-0.64	9.6e-08
chr12_111782808_111783348	0.213698	0	0	1	1	MAPKAPK5-AS1	0.561972	4.47586e-05	-59554	0.5	0.00014
chr12_113263647_113264022	0.185425	1.25455e-06	0	2	2	IQCD	1.80926	7.42758e-11	42553	0.54	2e-05
chr12_113263647_113264022	0.185425	1.25455e-06	0	2	2	PLBD2	1.01309	9.13775e-08	-94544	0.55	1.4e-05
chr12_113325989_113326524	0.157049	1.46667e-06	0	1	1	PLBD2	1.01309	9.13775e-08	-32042	0.45	0.0008
chr12_116663976_116664361	-0.151548	6.06061e-09	1	2	3	AC125603.2	2.15292	7.28515e-07	2394	-0.43	0.00084
chr12_120079070_120079570	-0.152486	1e-06	1	0	1	BICDL1	1.90756	3.98773e-08	89201	-0.45	0.00048
chr12_121215485_121215818	-0.150981	1.51515e-07	2	3	5	P2RX4	0.793251	4.45827e-06	5628	-0.51	8e-05
chr12_121278771_121279934	0.172218	8.9697e-07	1	3	4	P2RX4	0.793251	4.45827e-06	68914	0.38	0.006
chr12_121289093_121289353	0.207809	0	0	3	3	P2RX4	0.793251	4.45827e-06	79236	0.44	0.00063
chr12_122489207_122489662	-0.163194	2.06061e-07	3	3	6	KNTC1	1.99703	1.12517e-27	-37584	-0.42	0.0022
chr12_122997920_122998271	0.180648	6.72727e-07	0	1	1	ABCB9	1.45311	7.77242e-08	16271	0.6	8e-07
chr12_123043443_123043880	0.184618	1.18788e-06	0	5	5	ABCB9	1.45311	7.77242e-08	61794	0.39	0.0056
chr12_123071515_123071913	0.252594	7.39394e-07	1	3	4	ABCB9	1.45311	7.77242e-08	89866	0.61	5.8e-07
chr12_123260071_123260327	-0.184571	1.70909e-06	1	0	1	MPHOSPH9	0.635622	1.34377e-06	16057	-0.42	0.0023
chr12_124900494_124901202	-0.212336	1.81818e-08	3	5	8	DHX37	0.767832	2.12051e-07	-87920	-0.44	0.0011
chr12_124900494_124901202	-0.212336	1.81818e-08	3	5	8	BRI3BP	0.61469	5.94992e-08	-92498	-0.55	9.2e-06
chr12_131860006_131860383	-0.193634	9.09091e-08	2	3	5	AC131009.1	1.27104	0.000154764	-68968	-0.39	0.0084
chr13_20715227_20715887	-0.211502	1.39394e-07	1	0	1	IL17D	1.31415	1.43973e-05	13100	-0.47	0.00018
chr13_24925825_24926497	-0.202034	1.0303e-07	1	1	2	TPTE2P1	3.41823	1.21093e-11	-41990	-0.38	0.0048
chr13_27906131_27907039	-0.246256	1.27273e-07	1	0	1	PDX1	2.95882	1.10297e-05	-12981	0.35	0.0076
chr13_27908104_27908755	-0.235636	9.69697e-07	1	0	1	PDX1	2.95882	1.10297e-05	-11265	0.44	0.00052
chr13_28035278_28035744	-0.189273	1.09091e-07	0	1	1	FLT3	-1.33176	0.000100097	-64848	0.52	1.8e-05
chr13_28401954_28402201	-0.199397	3.20606e-06	0	2	2	FLT1	0.661857	0.0011355	-92944	-0.4	0.00093
chr13_40618864_40619143	-0.159207	2.51515e-06	2	2	4	FOXO1	-1.33219	1.63512e-13	-47454	0.38	0.0036
chr13_71790244_71790461	-0.25037	3.39394e-07	0	1	1	DACH1	-2.26217	2.93946e-13	-76731	0.56	1.4e-06
chr13_71797517_71797793	-0.178598	3.67273e-06	0	1	1	DACH1	-2.26217	2.93946e-13	-69399	0.59	2.7e-07
chr13_97356638_97356871	0.187751	0	0	2	2	RAP2A	1.23207	6.82938e-16	-77351	0.61	3.9e-07
chr13_98490752_98491013	-0.169375	2e-06	3	3	6	STK24	0.711025	3.20151e-09	-86927	-0.36	0.0034
chr13_99626973_99627512	0.169199	6.06061e-08	0	3	3	CLYBL	-1.05943	4.23271e-06	20304	-0.34	0.006
chr13_102319376_102319692	-0.28736	0	1	0	1	FGF14-AS2	-1.17785	9.40074e-05	-74938	0.5	5e-05
chr13_102324466_102324895	-0.209101	0	2	2	4	FGF14-AS2	-1.17785	9.40074e-05	-69735	0.45	0.00042
chr13_102325326_102325802	-0.256426	0	2	3	5	FGF14-AS2	-1.17785	9.40074e-05	-68828	0.4	0.0018
chr13_102367843_102368512	-0.255299	1.81818e-08	2	0	2	FGF14-AS2	-1.17785	9.40074e-05	-26118	0.49	8e-05
chr13_110218296_110218381	-0.318151	2e-07	0	1	1	COL4A1	2.05506	2.48568e-15	-88852	-0.36	0.007
chr13_110222569_110222888	-0.180471	3.63636e-07	0	1	1	COL4A1	2.05506	2.48568e-15	-84345	-0.38	0.004
chr13_110225135_110225739	-0.342273	5.69697e-07	0	2	2	COL4A1	2.05506	2.48568e-15	-81494	-0.36	0.0068
chr13_110227825_110229116	-0.327629	1.47273e-06	0	2	2	COL4A1	2.05506	2.48568e-15	-78117	-0.34	0.0098
chr13_110232653_110233057	-0.299988	2.60606e-07	1	0	1	COL4A1	2.05506	2.48568e-15	-74176	-0.38	0.0038
chr13_110239198_110239839	-0.233246	1.70909e-06	0	2	2	COL4A1	2.05506	2.48568e-15	-67394	-0.37	0.0054
chr13_110264734_110267336	-0.314308	3.0303e-07	0	1	1	COL4A1	2.05506	2.48568e-15	-39897	-0.36	0.0064
chr13_110276754_110277166	-0.304065	4.60606e-07	0	1	1	COL4A1	2.05506	2.48568e-15	-30067	-0.38	0.004
chr13_110299251_110299803	-0.289231	1.0303e-07	0	1	1	COL4A1	2.05506	2.48568e-15	-7430	-0.41	0.0014
chr13_110310341_110312023	-0.281251	3.63636e-07	0	1	1	COL4A1	2.05506	2.48568e-15	3108	-0.4	0.002
chr13_110329715_110330407	-0.304213	5.57576e-07	0	1	1	COL4A1	2.05506	2.48568e-15	22482	-0.41	0.0013
chr13_110332309_110332898	-0.309974	4.72727e-07	0	1	1	COL4A1	2.05506	2.48568e-15	25076	-0.45	0.0003
chr13_110335848_110336484	-0.309259	4.60606e-07	0	2	2	COL4A1	2.05506	2.48568e-15	28615	-0.38	0.0032
chr13_110336945_110337681	-0.350722	5.0303e-07	0	2	2	COL4A1	2.05506	2.48568e-15	29712	-0.39	0.003
chr13_110340649_110340906	-0.239221	6.54545e-07	0	3	3	COL4A1	2.05506	2.48568e-15	33416	-0.35	0.0094
chr13_110341253_110341899	-0.188746	9.93939e-07	1	2	3	COL4A1	2.05506	2.48568e-15	34020	-0.37	0.0042
chr13_110376570_110377053	-0.337963	1.27273e-07	0	1	1	COL4A1	2.05506	2.48568e-15	69337	-0.37	0.0052
chr13_110386765_110387626	-0.291112	2.24242e-07	0	1	1	COL4A1	2.05506	2.48568e-15	79532	-0.42	0.0011
chr13_110387831_110390493	-0.291344	1.57576e-07	0	1	1	COL4A1	2.05506	2.48568e-15	80598	-0.42	0.00088
chr13_110397302_110398009	-0.199015	5.75758e-07	1	3	4	COL4A1	2.05506	2.48568e-15	90069	-0.44	0.00054
chr13_110406802_110407573	-0.318256	1.43636e-06	0	2	2	COL4A1	2.05506	2.48568e-15	99569	-0.34	0.0051
chr13_112711819_112712298	0.318171	7.51515e-07	1	5	6	AL139384.1	0.54818	0.0143827	22004	0.4	0.002
chr14_20426223_20427089	-0.189391	1.15758e-06	1	0	1	APEX1	0.532932	2.01394e-07	-28102	-0.43	0.0033
chr14_20426223_20427089	-0.189391	1.15758e-06	1	0	1	PARP2	0.764595	1.10426e-13	82641	-0.45	0.002
chr14_20611115_20611481	-0.154765	2.24242e-07	0	1	1	ANG	-1.76009	2.54033e-08	-72696	0.39	0.006
chr14_21053195_21053861	-0.155092	0	2	3	5	ZNF219	1.12568	1.80627e-16	-50861	-0.56	1.4e-05
chr14_21063111_21063621	0.184252	1.57576e-07	2	2	4	ZNF219	1.12568	1.80627e-16	-41101	0.46	0.001
chr14_22392065_22392469	-0.215893	0	0	1	1	AC244502.1	-0.884163	0.0121064	-90490	0.38	0.0096
chr14_22551638_22552123	-0.218907	6.66667e-08	1	1	2	AC244502.1	-0.884163	0.0121064	68679	0.46	0.0006
chr14_22965804_22966761	-0.238748	0	1	1	2	PRMT5	0.844667	9.76158e-10	36219	-0.62	9.2e-07
chr14_22965804_22966761	-0.238748	0	1	1	2	C14orf93	0.617374	6.82213e-08	-43405	-0.5	0.00033
chr14_22965804_22966761	-0.238748	0	1	1	2	CDH24	1.66142	1.90686e-11	-90777	-0.43	0.0055
chr14_22978715_22979007	-0.162965	2e-06	1	1	2	C14orf93	0.617374	6.82213e-08	-31159	-0.46	0.0012
chr14_22978715_22979007	-0.162965	2e-06	1	1	2	PRMT5	0.844667	9.76158e-10	49130	-0.5	0.00036
chr14_22978715_22979007	-0.162965	2e-06	1	1	2	CDH24	1.66142	1.90686e-11	-78531	-0.44	0.0029
chr14_22979346_22980244	-0.223436	3.57576e-07	1	2	3	C14orf93	0.617374	6.82213e-08	-29922	-0.54	6.2e-05
chr14_22979346_22980244	-0.223436	3.57576e-07	1	2	3	PRMT5	0.844667	9.76158e-10	49761	-0.51	0.0002
chr14_22979346_22980244	-0.223436	3.57576e-07	1	2	3	CDH24	1.66142	1.90686e-11	-77294	-0.53	7.7e-05
chr14_24034736_24034822	-0.206496	2.4e-06	1	0	1	CARMIL3	-1.5978	1.05724e-10	-17178	0.46	0.0015
chr14_24065583_24066155	0.224194	4.24242e-08	0	1	1	CARMIL3	-1.5978	1.05724e-10	13583	-0.52	0.0002
chr14_24065583_24066155	0.224194	4.24242e-08	0	1	1	PCK2	-1.33736	3.9015e-07	-27898	-0.57	1.4e-05
chr14_24065583_24066155	0.224194	4.24242e-08	0	1	1	DCAF11	-1.00429	6.27111e-10	-48040	-0.43	0.0056
chr14_24066443_24066629	0.214749	0	0	2	2	CARMIL3	-1.5978	1.05724e-10	14443	-0.45	0.0025
chr14_24066443_24066629	0.214749	0	0	2	2	PCK2	-1.33736	3.9015e-07	-27424	-0.6	2.5e-06
chr14_24066443_24066629	0.214749	0	0	2	2	DCAF11	-1.00429	6.27111e-10	-47566	-0.42	0.0073
chr14_24606523_24607700	-0.232043	1.84848e-06	0	1	1	CMA1	-1.25748	0.00599698	98258	0.42	0.002
chr14_24607974_24608478	-0.226642	4.84848e-08	0	1	1	CMA1	-1.25748	0.00599698	99709	0.38	0.009
chr14_49771726_49771864	-0.196535	2.32121e-06	1	1	2	AL627171.2	0.60633	0.00215617	-92462	-0.49	0.00027
chr14_52272902_52273778	-0.294846	5.93939e-07	0	1	1	PTGDR	-2.26473	2.34035e-18	5189	0.49	7.4e-05
chr14_52272902_52273778	-0.294846	5.93939e-07	0	1	1	PTGER2	-1.53857	3.08582e-09	-40527	0.44	0.00056
chr14_52458286_52458567	-0.240903	0	1	4	5	TXNDC16	0.549414	1.27509e-05	-93955	-0.55	4.4e-06
chr14_54537836_54538390	-0.153082	6.36364e-07	1	0	1	GMFB	0.66874	5.88129e-06	48640	-0.5	0.0001
chr14_55599369_55599720	-0.189875	2.50909e-06	2	4	6	KTN1-AS1	0.823765	2.24163e-09	19259	-0.36	0.0068
chr14_64410987_64411399	0.212016	3.57576e-07	0	1	1	MTHFD1	-1.12651	1.37909e-06	22956	-0.44	0.002
chr14_72852620_72853034	-0.161929	1.27273e-07	0	1	1	DPF3	-2.10782	1.29742e-16	-41082	0.48	0.0001
chr14_72860392_72860710	-0.168089	4.84848e-08	0	1	1	DPF3	-2.10782	1.29742e-16	-33406	0.46	0.00042
chr14_74017756_74018096	-0.150834	2.42424e-08	0	2	2	ALDH6A1	-1.67873	4.91404e-12	-66397	0.4	0.0077
chr14_75643938_75644037	-0.17837	7.0303e-07	1	2	3	TTLL5	0.604186	6.98085e-09	10313	-0.43	0.0013
chr14_88013330_88013803	-0.193553	6.06061e-09	1	1	2	GPR65	-1.37903	7.48112e-08	8206	0.61	4e-07
chr14_91875626_91875957	-0.239521	7.27273e-08	2	3	5	FBLN5	-0.903476	0.0173341	-72030	0.42	0.0014
chr14_91876186_91876457	-0.209007	0	0	3	3	FBLN5	-0.903476	0.0173341	-71530	0.39	0.0036
chr14_91910621_91910943	-0.188298	2.76364e-06	0	1	1	FBLN5	-0.903476	0.0173341	-37044	0.35	0.0084
chr14_100843385_100843648	-0.247257	1.28485e-06	1	0	1	MEG8	1.29914	0.0396916	-51122	0.44	0.00046
chr14_100846291_100846446	-0.263202	3.47273e-06	1	0	1	MEG8	1.29914	0.0396916	-48324	0.35	0.009
chr14_100983729_100983948	-0.251204	4.37576e-06	1	0	1	MEG8	1.29914	0.0396916	88959	0.37	0.0023
chr14_100994412_100994766	-0.263419	7.94545e-06	1	0	1	MEG8	1.29914	0.0396916	99642	0.38	0.0015
chr14_101554997_101555240	-0.229577	3.87879e-07	0	1	1	DIO3OS	-1.50305	0.00498821	-5191	0.61	1.4e-07
chr14_101557156_101557291	-0.213276	1.67273e-06	0	1	1	DIO3OS	-1.50305	0.00498821	-3140	0.49	4.5e-05
chr14_102083665_102084512	-0.179378	1.36364e-06	1	1	2	HSP90AA1	0.630515	1.30479e-05	-55187	-0.58	1.4e-06
chr14_102084734_102085153	-0.233405	1.27273e-07	1	1	2	HSP90AA1	0.630515	1.30479e-05	-54546	-0.61	2e-07
chr14_102085359_102085595	-0.193155	9.57576e-07	0	1	1	HSP90AA1	0.630515	1.30479e-05	-54104	-0.59	5.2e-07
chr14_102209102_102209592	0.169428	2.69697e-06	0	2	2	HSP90AA1	0.630515	1.30479e-05	69403	0.44	0.00072
chr14_103624678_103624845	-0.175021	5.12727e-06	0	1	1	TRMT61A	0.771908	1.92991e-10	95494	-0.45	0.0021
chr14_104171872_104174200	-0.341607	4.84848e-07	0	1	1	KIF26A	-0.795965	0.00880761	33149	0.45	0.00057
chr14_104171872_104174200	-0.341607	4.84848e-07	0	1	1	ASPG	-2.38388	2.36434e-07	86193	0.51	5.1e-05
chr14_104654420_104655061	-0.196236	1.21212e-08	0	2	2	C14orf180	-5.4107	3.14913e-49	74736	0.67	5e-09
chr14_104666638_104666846	-0.171737	9.09091e-07	0	1	1	C14orf180	-5.4107	3.14913e-49	86954	0.6	6.5e-07
chr14_105284853_105285121	0.151269	1.21212e-06	0	3	3	AL928654.4	0.81926	0.00034446	-85297	0.39	0.006
chr15_40010832_40011104	0.203979	0	0	2	2	GPR176	1.07096	2.83967e-05	89940	0.63	1.7e-07
chr15_40010832_40011104	0.203979	0	0	2	2	BMF	0.779213	0.00198856	-97788	0.39	0.006
chr15_40075457_40075764	-0.199665	2.63636e-06	1	0	1	BUB1B	4.15814	2.67786e-50	-85259	-0.51	6e-05
chr15_40100406_40101049	-0.207368	1.27273e-07	2	4	6	BUB1B	4.15814	2.67786e-50	-59974	-0.43	0.0016
chr15_40412656_40412842	-0.241999	6.12121e-07	3	1	4	KNSTRN	1.01889	1.43467e-15	29935	-0.41	0.0057
chr15_40422344_40422534	-0.157554	2.2303e-06	1	0	1	KNSTRN	1.01889	1.43467e-15	39623	-0.45	0.0015
chr15_40936912_40937006	0.208523	1.45455e-07	0	1	1	DLL4	1.19616	1.1094e-10	7579	0.54	2.9e-05
chr15_40936912_40937006	0.208523	1.45455e-07	0	1	1	SPINT1	1.61718	0.000637182	92894	0.38	0.0096
chr15_41416151_41416389	-0.221727	0	0	1	1	ITPKA	2.58457	7.44099e-27	-77004	-0.61	9e-07
chr15_41928727_41929010	-0.27351	4e-07	2	3	5	EHD4	0.665939	2.96138e-05	-43568	-0.47	0.00036
chr15_41962642_41962773	-0.185599	1e-06	1	2	3	EHD4	0.665939	2.96138e-05	-9805	-0.44	0.001
chr15_41977217_41977950	-0.219155	6.06061e-08	1	1	2	EHD4	0.665939	2.96138e-05	4639	-0.37	0.0096
chr15_45449753_45449944	-0.201521	6.66667e-08	1	1	2	SPATA5L1	0.605314	2.19897e-07	47422	-0.52	5.7e-05
chr15_56366769_56367171	-0.159517	6.06061e-09	1	2	3	MNS1	2.34495	2.35326e-12	-97966	-0.56	2e-06
chr15_59330792_59331220	-0.20217	3.15152e-07	1	3	4	AC092868.1	1.93013	5.97629e-07	-76934	-0.41	0.0019
chr15_62069207_62069487	-0.187785	1.33333e-07	1	0	1	C2CD4A	2.54787	1.95131e-05	2230	-0.48	0.00017
chr15_63198427_63199008	-0.189873	3.0303e-08	1	4	5	APH1B	0.561785	0.00247379	-77010	-0.4	0.004
chr15_63263578_63263977	-0.174002	1.21212e-06	1	1	2	APH1B	0.561785	0.00247379	-12041	-0.41	0.0014
chr15_64074203_64074548	-0.189259	6.06061e-09	2	3	5	DAPK2	1.13985	1.47293e-08	2170	-0.59	2.1e-06
chr15_66467717_66467856	0.198028	1.81818e-08	1	3	4	ZWILCH	1.28904	3.78769e-26	-37103	0.57	7.2e-06
chr15_66487232_66487511	0.217192	0	0	3	3	ZWILCH	1.28904	3.78769e-26	-17448	0.63	1.9e-07
chr15_66590925_66591185	-0.174804	1.27273e-07	0	1	1	ZWILCH	1.28904	3.78769e-26	85966	-0.53	4e-05
chr15_72167424_72168009	-0.258719	1.81818e-08	0	1	1	PKM	2.34354	1.44756e-13	-63813	-0.46	0.00036
chr15_73980825_73981280	-0.159818	2.01212e-06	2	2	4	STOML1	0.568494	4.12715e-06	-13342	-0.47	0.00036
chr15_74040921_74041071	-0.192477	9.75758e-07	0	1	1	STOML1	0.568494	4.12715e-06	46299	-0.45	0.00064
chr15_74798662_74798949	0.183001	3.0303e-08	0	4	4	CYP1A2	-4.56282	1.01975e-16	49818	-0.58	3.4e-06
chr15_74798662_74798949	0.183001	3.0303e-08	0	4	4	CYP1A1	-1.77292	0.00243028	73052	-0.41	0.0042
chr15_75763061_75763598	-0.164816	2.72727e-07	1	0	1	UBE2Q2	0.82563	0.00011929	-79687	-0.47	0.00037
chr15_77006683_77007889	-0.286593	1.27273e-07	0	2	2	RCN2	0.982284	1.59869e-11	75064	-0.4	0.0044
chr15_77013429_77013780	-0.219228	1.05455e-06	1	1	2	RCN2	0.982284	1.59869e-11	81810	-0.43	0.0012
chr15_78988251_78988781	-0.218636	3.33333e-07	2	2	4	CTSH	0.523663	0.00335881	38677	-0.41	0.0014
chr15_80596639_80597033	-0.204531	3.21212e-07	0	1	1	ABHD17C	0.696904	0.000811219	-82651	-0.36	0.0072
chr15_82263786_82264425	-0.220301	1.27273e-07	1	3	4	UBE2Q2P2	1.07463	1.12694e-08	-90717	-0.4	0.0035
chr15_88239220_88239545	-0.265475	2.60606e-07	0	1	1	NTRK3	-1.80574	3.89882e-05	-17223	0.41	0.0008
chr15_89761151_89761390	0.192967	2.33939e-06	1	3	4	MESP2	4.05212	1.01659e-35	560	0.4	0.0056
chr15_89806600_89806748	-0.190804	5.85455e-06	1	0	1	MESP2	4.05212	1.01659e-35	46009	-0.37	0.008
chr15_89858212_89858313	-0.182586	1.67273e-06	2	3	5	MESP2	4.05212	1.01659e-35	97621	-0.51	5.5e-05
chr15_90193178_90193383	0.175086	3.27273e-07	2	3	5	NGRN	0.587693	3.77888e-07	-72276	0.41	0.0036
chr15_90212889_90213232	0.154373	1.21212e-08	0	3	3	NGRN	0.587693	3.77888e-07	-52427	0.39	0.0048
chr15_90647797_90648091	-0.162598	0	1	0	1	CRTC3-AS1	0.852752	0.000195769	-69050	-0.4	0.0032
chr15_90647797_90648091	-0.162598	0	1	0	1	BLM	2.4485	1.42723e-20	-69236	-0.45	0.00068
chr15_90751516_90751880	-0.18473	5.15152e-07	1	2	3	BLM	2.4485	1.42723e-20	34189	-0.35	0.0074
chr15_90751516_90751880	-0.18473	5.15152e-07	1	2	3	CRTC3-AS1	0.852752	0.000195769	34375	-0.47	0.00015
chr15_91940814_91941430	-0.194037	6.06061e-09	1	4	5	SLCO3A1	0.63976	0.012824	87119	-0.47	9.7e-05
chr15_95253430_95254047	-0.235444	9.81818e-07	1	3	4	LINC01197	-1.40379	1.1622e-07	-73082	0.51	3e-05
chr15_95264791_95265905	-0.151246	1.30909e-06	1	3	4	LINC01197	-1.40379	1.1622e-07	-61224	0.46	0.00022
chr15_95275482_95275858	-0.287699	7.39394e-07	0	1	1	LINC01197	-1.40379	1.1622e-07	-51271	0.5	5e-05
chr15_95279487_95280068	-0.265187	5.75758e-07	1	1	2	LINC01197	-1.40379	1.1622e-07	-47061	0.44	0.00052
chr15_95280774_95281018	-0.268257	8.54545e-07	0	1	1	LINC01197	-1.40379	1.1622e-07	-46111	0.43	0.00064
chr15_95282353_95282897	-0.275313	2.54545e-07	0	1	1	LINC01197	-1.40379	1.1622e-07	-44232	0.5	5.2e-05
chr15_95291737_95291902	-0.22408	1.77576e-06	0	1	1	LINC01197	-1.40379	1.1622e-07	-35227	0.47	0.00015
chr15_95302894_95303214	-0.28073	1.39394e-07	0	1	1	LINC01197	-1.40379	1.1622e-07	-23915	0.45	0.00042
chr15_95303820_95304122	-0.264646	6.61212e-06	0	2	2	LINC01197	-1.40379	1.1622e-07	-23007	0.37	0.0046
chr15_95304989_95305626	-0.21135	1.33333e-07	0	2	2	LINC01197	-1.40379	1.1622e-07	-21503	0.44	0.00046
chr15_95323690_95324867	-0.296332	1.27273e-07	1	1	2	LINC01197	-1.40379	1.1622e-07	-2262	0.48	9.2e-05
chr15_95362575_95362988	-0.246873	2.06061e-07	1	0	1	LINC01197	-1.40379	1.1622e-07	35446	0.53	1.1e-05
chr15_95363445_95363817	-0.166934	3.41212e-06	1	0	1	LINC01197	-1.40379	1.1622e-07	36316	0.37	0.0044
chr15_95394167_95394739	-0.234431	9.75758e-07	0	1	1	LINC01197	-1.40379	1.1622e-07	67038	0.53	1.2e-05
chr15_95410470_95410661	-0.235185	1.47879e-06	1	1	2	LINC01197	-1.40379	1.1622e-07	83341	0.42	0.0012
chr15_99156122_99156231	-0.215061	7.0303e-07	1	2	3	AC036108.2	1.30149	0.00159891	24316	-0.45	0.0008
chr16_2015171_2015732	-0.207926	0	0	1	1	SLC9A3R2	-1.26424	1.08785e-09	-9624	0.42	0.0071
chr16_2090369_2091107	0.218886	5.45455e-08	0	1	1	NTHL1	-0.778022	0.0004467	42503	-0.53	9e-05
chr16_2090369_2091107	0.218886	5.45455e-08	0	1	1	TRAF7	0.591591	7.82609e-05	-64591	0.5	0.00036
chr16_2090369_2091107	0.218886	5.45455e-08	0	1	1	SLC9A3R2	-1.26424	1.08785e-09	65013	-0.5	0.00039
chr16_2091345_2091539	0.161215	3.26667e-06	0	1	1	NTHL1	-0.778022	0.0004467	43479	-0.45	0.0026
chr16_2091345_2091539	0.161215	3.26667e-06	0	1	1	TRAF7	0.591591	7.82609e-05	-64159	0.43	0.0043
chr16_2129140_2129333	-0.176791	2.43636e-06	0	1	1	TRAF7	0.591591	7.82609e-05	-26365	-0.43	0.0059
chr16_2484438_2484938	-0.170393	4.12121e-07	1	3	4	TEDC2	2.91207	2.15734e-31	24358	-0.46	0.0018
chr16_2484438_2484938	-0.170393	4.12121e-07	1	3	4	AC106820.5	2.01973	9.85983e-07	24459	-0.41	0.0091
chr16_2484438_2484938	-0.170393	4.12121e-07	1	3	4	AC106820.3	1.21395	0.00138172	31461	-0.43	0.0043
chr16_3073491_3073654	-0.25816	1.21212e-07	1	1	2	PKMYT1	2.6912	1.35727e-28	92952	-0.46	0.0021
chr16_3079754_3080271	-0.250314	5.0303e-07	0	1	1	PKMYT1	2.6912	1.35727e-28	99215	-0.44	0.0049
chr16_4348305_4348411	0.172444	4.34545e-06	0	2	2	GLIS2	0.989184	0.000315777	33544	0.45	0.0018
chr16_4369021_4369403	0.259404	1.39394e-07	0	1	1	GLIS2	0.989184	0.000315777	54260	0.47	0.00072
chr16_4376702_4376959	0.218336	1.90303e-06	0	1	1	GLIS2	0.989184	0.000315777	61941	0.5	0.00021
chr16_5040079_5040467	-0.189158	7.33333e-07	0	1	1	NAGPA	0.566517	0.00017165	5938	-0.42	0.0026
chr16_5040079_5040467	-0.189158	7.33333e-07	0	1	1	EEF2KMT	0.618272	1.22002e-05	-57341	-0.56	8e-06
chr16_16213590_16213788	-0.188256	4.12121e-07	2	3	5	NOMO3	0.937465	0.00536584	-18707	-0.46	0.00048
chr16_20674730_20675359	0.192541	1.27273e-07	0	2	2	ACSM3	-2.08286	1.10547e-13	64487	-0.53	4e-05
chr16_21265519_21265721	0.196663	3.21212e-06	1	4	5	ANKS4B	-1.25127	2.43809e-07	31854	-0.56	2.6e-06
chr16_27264089_27264525	-0.159925	0	1	2	3	KDM8	-2.9263	3.44203e-21	60594	0.51	0.0001
chr16_27273590_27274230	-0.203661	2.42424e-08	2	1	3	KDM8	-2.9263	3.44203e-21	70095	0.7	0
chr16_27318776_27318941	0.248314	3.51515e-07	2	5	7	IL4R	-0.991985	1.5776e-08	5108	-0.41	0.0032
chr16_29128717_29129014	0.249026	3.65455e-06	0	3	3	AC009093.5	-2.46206	1.05318e-08	-97334	-0.65	1.1e-08
chr16_29131098_29131428	0.294442	3.87879e-07	0	1	1	AC009093.5	-2.46206	1.05318e-08	-94920	-0.52	2.4e-05
chr16_29184309_29184706	-0.168283	1.27273e-07	0	1	1	AC009093.5	-2.46206	1.05318e-08	-41642	0.46	0.00035
chr16_29204517_29204837	-0.21524	1.33333e-07	0	1	1	AC009093.5	-2.46206	1.05318e-08	-21511	0.52	4.3e-05
chr16_30124703_30125033	-0.175466	4.48485e-07	1	2	3	BOLA2B	0.546227	0.0281298	-69273	-0.58	7.8e-06
chr16_30998227_30998516	-0.242232	1.21212e-07	0	4	4	FBXL19-AS1	1.65215	5.41308e-11	74958	-0.46	0.0025
chr16_30998227_30998516	-0.242232	1.21212e-07	0	4	4	FBXL19	0.59959	0.000651816	75172	-0.42	0.0099
chr16_30998227_30998516	-0.242232	1.21212e-07	0	4	4	ZNF668	0.664854	1.6985e-05	-75804	-0.48	0.00085
chr16_48632121_48632359	-0.165995	6.06061e-09	0	1	1	AC007611.1	1.27959	5.23245e-09	8685	-0.58	1.6e-06
chr16_50613667_50613887	-0.257713	4.60606e-07	0	1	1	NKD1	2.69346	4.08811e-08	65337	-0.42	0.0022
chr16_53043980_53044094	0.155729	1e-06	1	1	2	AC007906.2	-3.0847	1.95225e-21	-8779	-0.38	0.0038
chr16_53129439_53129622	-0.158239	2.73939e-06	1	1	2	AC007906.2	-3.0847	1.95225e-21	76566	0.44	0.00052
chr16_56660636_56660966	-0.173445	0	0	1	1	MT1F	-3.69845	3.24429e-17	2942	0.59	5.3e-06
chr16_56660636_56660966	-0.173445	0	0	1	1	MT1G	-3.4304	6.06178e-10	-7099	0.57	1.1e-05
chr16_56660636_56660966	-0.173445	0	0	1	1	MT1H	-2.1314	0.00147694	-8848	0.59	4.2e-06
chr16_56660636_56660966	-0.173445	0	0	1	1	MT1CP	-2.00835	0.00119628	12388	0.52	0.00013
chr16_56660636_56660966	-0.173445	0	0	1	1	MT1DP	-1.36683	0.00164022	16931	0.44	0.0036
chr16_56660636_56660966	-0.173445	0	0	1	1	MT1X	-3.54656	1.46961e-17	-21458	0.59	4.6e-06
chr16_56660636_56660966	-0.173445	0	0	1	1	MT1JP	-5.27345	1.35907e-20	24897	0.57	9.4e-06
chr16_56660636_56660966	-0.173445	0	0	1	1	MT1M	-3.65069	2.32588e-12	28403	0.59	5.3e-06
chr16_56660636_56660966	-0.173445	0	0	1	1	MT1L	-2.57956	5.27846e-10	43160	0.57	1.3e-05
chr16_56660636_56660966	-0.173445	0	0	1	1	MT2A	-3.35297	4.85341e-24	52437	0.67	0
chr16_56660636_56660966	-0.173445	0	0	1	1	NUP93	0.63505	2.8145e-06	-69139	-0.48	0.00085
chr16_56910815_56911157	-0.190374	6.36364e-07	0	3	3	CETP	-3.94046	3.80557e-49	-50693	0.55	1.5e-05
chr16_56915587_56916049	-0.18471	1.27273e-07	1	1	2	CETP	-3.94046	3.80557e-49	-45801	0.67	0
chr16_58717601_58718585	0.211335	1.81818e-08	0	3	3	GOT2	-1.58435	1.3517e-14	-15772	-0.66	1.4e-08
chr16_58717601_58718585	0.211335	1.81818e-08	0	3	3	SLC38A7	0.57517	0.000136085	32497	0.52	5.2e-05
chr16_66660902_66661023	0.178102	2.41212e-06	2	4	6	CMTM1	0.57376	0.0342448	94509	0.39	0.0091
chr16_67734690_67735173	0.21749	1.27273e-07	0	1	1	GFOD2	-1.03261	2.96212e-13	15269	-0.46	0.00088
chr16_67995689_67995968	-0.214688	4.24242e-07	0	3	3	LCAT	-3.36192	3.05709e-36	51558	0.58	4.9e-06
chr16_74698835_74699107	-0.193626	6.06061e-09	1	1	2	RFWD3	0.660886	2.1645e-08	31954	-0.45	0.00054
chr16_74731927_74732278	-0.184813	1.23636e-06	0	1	1	RFWD3	0.660886	2.1645e-08	65046	-0.37	0.005
chr16_78598292_78598633	0.212028	0	0	1	1	AC046158.1	-2.05393	1.01101e-06	91724	-0.35	0.0036
chr16_78984373_78984816	-0.22563	1.47273e-06	0	2	2	AC027279.2	1.10882	0.011359	-9529	-0.32	0.0096
chr16_82083168_82083430	-0.179806	3.33333e-07	2	4	6	HSD17B2	-1.98952	2.68012e-17	48164	0.51	5.6e-05
chr16_83802945_83803492	-0.188664	2.15758e-06	0	1	1	AC009119.1	-1.45813	1.82596e-07	-4342	0.4	0.0029
chr16_83903812_83904046	0.205295	1.57576e-07	0	3	3	MLYCD	-1.46816	1.52454e-15	4686	-0.5	0.00014
chr16_84532755_84533437	-0.248836	1.43636e-06	0	2	2	COTL1	-0.585288	0.0458187	-84640	0.38	0.004
chr16_84550692_84551024	-0.263196	1.27273e-07	1	2	3	COTL1	-0.585288	0.0458187	-67053	0.38	0.0057
chr16_84567197_84569476	-0.305381	1.15152e-07	0	1	1	COTL1	-0.585288	0.0458187	-48601	0.42	0.0016
chr16_84592823_84593295	-0.240705	3.21818e-06	0	2	2	COTL1	-0.585288	0.0458187	-24782	0.36	0.009
chr16_85928749_85928997	-0.167529	3.63636e-08	0	1	1	IRF8	-1.33317	2.83621e-10	29946	0.35	0.0045
chr16_87842478_87842867	0.262076	6.30303e-07	1	1	2	CA5A	-1.72308	7.33827e-10	-93713	-0.43	0.0016
chr16_87849037_87849143	0.245786	5.51515e-06	0	2	2	CA5A	-1.72308	7.33827e-10	-87437	-0.43	0.0013
chr16_87857218_87857582	-0.15521	1.0303e-07	3	2	5	CA5A	-1.72308	7.33827e-10	-78998	0.38	0.008
chr16_88649333_88649741	-0.203367	4.24242e-08	1	0	1	MVD	0.558408	0.00805892	-13420	-0.5	0.00018
chr16_88687551_88687810	-0.179257	7.75758e-07	0	1	1	MVD	0.558408	0.00805892	24390	-0.42	0.004
chr16_88759364_88759593	0.293894	5.57576e-07	2	1	3	CDT1	2.94198	6.53401e-33	-43620	0.57	8.8e-06
chr16_88759364_88759593	0.293894	5.57576e-07	2	1	3	MVD	0.558408	0.00805892	96203	0.55	3.5e-05
chr16_88763107_88763325	0.211018	6.66667e-08	1	2	3	CDT1	2.94198	6.53401e-33	-39888	0.61	9.2e-07
chr16_88763107_88763325	0.211018	6.66667e-08	1	2	3	MVD	0.558408	0.00805892	99946	0.53	6.4e-05
chr17_851059_851246	-0.265117	4.95152e-06	0	1	1	AC087392.1	-2.78436	2.96471e-07	-58386	0.61	2.6e-07
chr17_852075_852225	-0.280477	6.47273e-06	0	1	1	AC087392.1	-2.78436	2.96471e-07	-57407	0.61	1.6e-07
chr17_930652_931097	-0.230134	6.42424e-07	1	1	2	AC087392.1	-2.78436	2.96471e-07	21020	0.54	9e-06
chr17_930652_931097	-0.230134	6.42424e-07	1	1	2	NXN	-0.732038	0.031719	-48673	0.41	0.0021
chr17_957123_957304	-0.26437	7.39394e-07	0	1	1	NXN	-0.732038	0.031719	-22466	0.45	0.00054
chr17_957123_957304	-0.26437	7.39394e-07	0	1	1	AC087392.1	-2.78436	2.96471e-07	47491	0.56	3.6e-06
chr17_962059_962405	-0.257477	2.24242e-07	0	1	1	NXN	-0.732038	0.031719	-17365	0.47	0.00023
chr17_962059_962405	-0.257477	2.24242e-07	0	1	1	AC087392.1	-2.78436	2.96471e-07	52427	0.66	4.2e-09
chr17_1000949_1001211	0.232504	5.0303e-07	0	1	1	AC087392.1	-2.78436	2.96471e-07	91317	-0.47	0.00019
chr17_1038632_1040102	-0.299948	2.09697e-06	0	2	2	NXN	-0.732038	0.031719	58862	0.35	0.0074
chr17_1040495_1041207	-0.291411	1.61212e-06	1	0	1	NXN	-0.732038	0.031719	60725	0.39	0.003
chr17_1046865_1048067	-0.30515	1.13939e-06	0	1	1	NXN	-0.732038	0.031719	67095	0.44	0.00058
chr17_1555137_1555790	0.158496	4.49091e-06	0	3	3	SLC43A2	0.723711	0.0099772	-73096	0.43	0.0032
chr17_1801836_1802044	0.193808	1.0303e-07	0	1	1	RPA1	0.505332	0.000107956	-27658	0.41	0.0056
chr17_4222301_4222630	0.181995	0	0	1	1	CYB5D2	-1.20406	3.2894e-15	79133	-0.46	0.00044
chr17_4235492_4236351	0.178413	0	0	3	3	CYB5D2	-1.20406	3.2894e-15	92324	-0.41	0.0033
chr17_4510804_4510979	-0.184889	1.49697e-06	0	1	1	AC118754.1	-2.34999	1.59796e-11	11130	0.41	0.0041
chr17_4933761_4934173	-0.194929	1.09091e-07	0	2	2	ENO3	-2.05964	2.7631e-07	-13919	0.42	0.0074
chr17_5238152_5239089	-0.216225	5.45455e-08	0	1	1	SCIMP	-1.51323	3.36423e-08	3292	0.38	0.009
chr17_8952408_8952799	-0.284843	9.39394e-07	0	2	2	PIK3R5	-0.798232	0.00265696	-12913	0.41	0.0034
chr17_8952408_8952799	-0.284843	9.39394e-07	0	2	2	AC002091.1	-0.690488	0.0214962	-14724	0.4	0.0049
chr17_16158193_16158314	0.264158	1.57576e-07	0	1	1	NCOR1	-1.06024	2.23819e-11	-59871	-0.53	1.1e-05
chr17_16285616_16285928	-0.155121	1.27273e-07	3	5	8	NCOR1	-1.06024	2.23819e-11	67431	0.5	0.00014
chr17_17540839_17541264	0.17543	1.0303e-07	0	2	2	AC020558.2	-2.26135	4.95749e-11	33488	-0.4	0.006
chr17_18116293_18117075	0.177057	6.54545e-07	0	2	2	AC087164.2	-2.742	2.52574e-09	5830	-0.67	5.6e-09
chr17_18719820_18720193	-0.174876	0	1	0	1	TRIM16L	2.67505	7.78433e-15	21822	-0.56	1.1e-05
chr17_19469192_19470187	-0.1821	0	0	1	1	B9D1	0.655772	0.00475969	90999	-0.46	0.00096
chr17_19905112_19905252	-0.181755	2.66667e-07	1	4	5	AC015726.1	-1.57051	2.01633e-09	7825	0.4	0.0044
chr17_28321350_28321868	-0.227182	2.78788e-07	1	2	3	TMEM97	0.851793	6.51538e-06	2255	-0.59	3.8e-06
chr17_28321350_28321868	-0.227182	2.78788e-07	1	2	3	TMEM199	0.515769	4.52057e-06	-35713	-0.57	1.5e-05
chr17_28366977_28367639	-0.221131	1.21212e-06	1	0	1	TMEM97	0.851793	6.51538e-06	47882	-0.46	0.0016
chr17_28489194_28489282	-0.221131	5.95758e-06	1	1	2	SLC13A2	1.83797	0.000435395	15901	-0.43	0.0022
chr17_28489194_28489282	-0.221131	5.95758e-06	1	1	2	UNC119	0.866725	1.31394e-06	-63386	-0.59	2.1e-06
chr17_28489194_28489282	-0.221131	5.95758e-06	1	1	2	PIGS	0.897158	1.04159e-06	-82590	-0.54	2.4e-05
chr17_28489536_28489895	-0.170831	1.37576e-06	1	1	2	UNC119	0.866725	1.31394e-06	-62773	-0.61	9.8e-07
chr17_28489536_28489895	-0.170831	1.37576e-06	1	1	2	PIGS	0.897158	1.04159e-06	-81977	-0.46	0.00084
chr17_28626911_28627230	0.199944	6.36364e-07	1	3	4	KIAA0100	0.948513	1.52002e-08	-18224	0.59	5.1e-06
chr17_28626911_28627230	0.199944	6.36364e-07	1	3	4	PIGS	0.897158	1.04159e-06	55039	0.49	0.00076
chr17_28626911_28627230	0.199944	6.36364e-07	1	3	4	UNC119	0.866725	1.31394e-06	74243	0.45	0.0031
chr17_28709416_28710379	-0.173772	2e-07	1	1	2	KIAA0100	0.948513	1.52002e-08	63962	-0.43	0.0045
chr17_30825043_30825251	-0.19193	7.21212e-07	0	1	1	AC127024.5	1.17516	0.00780682	32671	-0.4	0.0097
chr17_31052440_31052870	-0.215806	3.0303e-08	1	0	1	AC138207.3	1.52227	0.00119309	44121	-0.46	0.00099
chr17_35062126_35062821	-0.20701	4.12121e-07	0	1	1	NLE1	0.666671	7.46956e-06	-79494	-0.42	0.0033
chr17_35062126_35062821	-0.20701	4.12121e-07	0	1	1	LIG3	0.844358	3.4385e-14	81632	-0.45	0.001
chr17_35400585_35401039	-0.284382	1.81818e-08	1	0	1	AC015911.7	-0.909004	0.0341806	-97179	0.54	3.3e-05
chr17_35409993_35410442	-0.201525	2.56364e-06	1	0	1	AC015911.7	-0.909004	0.0341806	-87776	0.5	0.00023
chr17_35409993_35410442	-0.201525	2.56364e-06	1	0	1	AC022706.1	-0.58626	0.0379086	96491	0.44	0.0032
chr17_35434107_35434314	-0.215775	3.23636e-06	1	1	2	AC015911.7	-0.909004	0.0341806	-63904	0.49	0.00035
chr17_35521893_35522084	-0.243539	0	1	2	3	SLFN12	0.63601	0.0114531	88610	-0.42	0.0055
chr17_35530635_35530978	-0.228647	3.0303e-08	1	2	3	SLFN12	0.63601	0.0114531	97352	-0.46	0.0015
chr17_36087700_36088113	-0.186896	2.24242e-07	1	3	4	CCL3	-1.60091	3.76889e-09	-2056	0.41	0.0086
chr17_36087700_36088113	-0.186896	2.24242e-07	1	3	4	CCL23	-3.01256	2.62617e-27	69732	0.56	2.4e-05
chr17_37710236_37710479	-0.181179	2.60606e-07	3	5	8	DDX52	0.525224	3.00262e-10	66772	-0.49	0.00011
chr17_37716398_37716752	-0.157056	2.12121e-07	2	3	5	DDX52	0.525224	3.00262e-10	72934	-0.59	8.8e-07
chr17_38431142_38431519	-0.239296	4.6303e-06	0	1	1	AC244153.1	-1.59726	3.50298e-09	-20925	0.44	0.00087
chr17_38449224_38449417	-0.278797	9.33333e-07	0	1	1	AC244153.1	-1.59726	3.50298e-09	-3027	0.61	4.5e-07
chr17_40095417_40095616	0.185709	3.57576e-07	0	2	2	MED24	0.780775	2.24996e-16	34202	0.51	9.8e-05
chr17_40095417_40095616	0.185709	3.57576e-07	0	2	2	CASC3	0.861379	1.07026e-19	-44702	0.51	0.00013
chr17_40095417_40095616	0.185709	3.57576e-07	0	2	2	RAPGEFL1	0.615551	0.0246078	-81394	0.41	0.0045
chr17_40114202_40114491	-0.251483	1.27273e-07	2	5	7	MED24	0.780775	2.24996e-16	52987	-0.41	0.0052
chr17_40114202_40114491	-0.251483	1.27273e-07	2	5	7	RAPGEFL1	0.615551	0.0246078	-62519	-0.49	0.00027
chr17_42089248_42089717	-0.237222	5.45455e-08	1	0	1	ZNF385C	2.3854	1.60878e-13	-8762	-0.61	1.4e-06
chr17_42089248_42089717	-0.237222	5.45455e-08	1	0	1	C17orf113	1.06628	0.000610208	38634	-0.63	4.3e-07
chr17_42121797_42122054	-0.173336	6.06061e-09	1	2	3	ZNF385C	2.3854	1.60878e-13	23318	-0.41	0.0073
chr17_42522387_42522615	0.160368	5.69697e-07	1	2	3	TUBG1	1.27496	1.94563e-25	-87061	0.53	9.4e-05
chr17_43558843_43559125	-0.171891	0	2	0	2	ETV4	3.52691	7.45913e-16	-20495	-0.39	0.0028
chr17_44797348_44798309	-0.278202	2.18182e-07	0	1	1	GJC1	2.60413	7.11562e-25	-32507	-0.5	0.00014
chr17_44905503_44905963	-0.213334	9.69697e-08	1	1	2	C1QL1	4.22284	1.94563e-25	-62108	-0.47	0.00081
chr17_44905503_44905963	-0.213334	9.69697e-08	1	1	2	GJC1	2.60413	7.11562e-25	74687	-0.42	0.004
chr17_46942929_46943110	-0.173011	2.38788e-06	1	0	1	GOSR2	0.656714	5.30014e-13	19854	-0.58	2.2e-06
chr17_46944668_46944951	-0.212564	5.0303e-07	1	0	1	GOSR2	0.656714	5.30014e-13	21593	-0.44	0.00081
chr17_48162797_48163433	-0.159349	5.45455e-08	1	1	2	CBX1	0.951658	2.31148e-19	61276	-0.45	0.00051
chr17_48168137_48168643	-0.170179	1.81818e-08	2	0	2	CBX1	0.951658	2.31148e-19	66616	-0.59	6.8e-07
chr17_48198816_48199057	-0.185126	2e-07	1	0	1	CBX1	0.951658	2.31148e-19	97295	-0.42	0.00086
chr17_48199645_48199937	-0.225045	4.86667e-06	1	0	1	CBX1	0.951658	2.31148e-19	98124	-0.44	0.00044
chr17_49217419_49217958	-0.232743	2.06061e-06	1	3	4	PHOSPHO1	-1.56146	1.53597e-06	-12808	0.4	0.004
chr17_49455544_49455769	-0.236847	1.33333e-06	0	1	1	NGFR	-1.92153	8.04404e-06	-39524	0.62	1.7e-07
chr17_50098057_50098370	0.192162	0	0	1	1	ITGA3	1.03394	0.00350823	42089	0.44	0.0018
chr17_51255877_51256402	-0.191267	6.06061e-08	1	3	4	UTP18	0.657595	4.11349e-15	-4126	-0.41	0.0032
chr17_55762012_55762124	-0.185084	2.42424e-08	2	4	6	TMEM100	-1.27888	0.00309905	29891	0.46	0.00022
chr17_57838966_57839388	-0.232544	5.45455e-08	1	1	2	MRPS23	0.765461	2.7626e-09	-10668	-0.58	6.8e-07
chr17_57947478_57947669	-0.175674	5.45455e-07	1	2	3	MRPS23	0.765461	2.7626e-09	97422	-0.6	1.2e-06
chr17_58391343_58391642	-0.156054	1.33333e-07	3	4	7	AC004687.1	-1.2795	0.00156123	58835	0.44	0.0013
chr17_63751741_63752082	0.150141	2.72727e-07	0	2	2	CCDC47	0.572531	6.10733e-06	-24269	0.5	0.00017
chr17_63751741_63752082	0.150141	2.72727e-07	0	2	2	FTSJ3	0.817215	5.27422e-11	-77930	0.4	0.0088
chr17_67991962_67992546	-0.162073	2.42424e-08	1	1	2	C17orf58	0.736911	1.18551e-06	-3885	-0.72	0
chr17_67991962_67992546	-0.162073	2.42424e-08	1	1	2	KPNA2	2.11522	2.80669e-30	-42973	-0.6	5.7e-07
chr17_68097113_68097461	-0.188116	1.75758e-07	1	0	1	AC145343.1	1.85991	5.78183e-12	-4013	-0.56	6.8e-06
chr17_68097113_68097461	-0.188116	1.75758e-07	1	0	1	KPNA2	2.11522	2.80669e-30	61594	-0.47	0.00078
chr17_68187790_68188149	-0.208785	1.04848e-06	0	1	1	AC145343.1	1.85991	5.78183e-12	86316	-0.48	0.00037
chr17_69268559_69269397	-0.237099	0	1	3	4	ABCA10	-2.1482	2.91525e-10	23713	0.38	0.008
chr17_72566981_72567367	-0.242041	0	1	0	1	LINC00511	3.83141	6.01588e-14	-73105	-0.45	0.00019
chr17_74740791_74741358	-0.180711	6e-07	0	1	1	NAT9	0.734403	7.75336e-08	-35009	-0.49	0.00026
chr17_74740791_74741358	-0.180711	6e-07	0	1	1	TMEM104	1.06384	4.10274e-11	-35125	-0.48	0.00028
chr17_74752567_74752995	-0.164044	6.30303e-07	2	3	5	TMEM104	1.06384	4.10274e-11	-23488	-0.42	0.0029
chr17_74760189_74760496	-0.17532	9.39394e-07	2	2	4	NAT9	0.734403	7.75336e-08	-15871	-0.43	0.0022
chr17_74760189_74760496	-0.17532	9.39394e-07	2	2	4	TMEM104	1.06384	4.10274e-11	-15987	-0.43	0.0025
chr17_74763429_74763628	-0.171677	4.8e-06	1	1	2	NAT9	0.734403	7.75336e-08	-12739	-0.44	0.0018
chr17_74763429_74763628	-0.171677	4.8e-06	1	1	2	TMEM104	1.06384	4.10274e-11	-12855	-0.39	0.0072
chr17_75035428_75035948	-0.24928	2.42424e-08	1	2	3	HID1-AS1	-2.43689	4.16313e-16	64724	0.44	0.0019
chr17_75087560_75088234	0.267687	1.32121e-06	1	1	2	JPT1	1.23875	3.1078e-16	-80047	0.43	0.0034
chr17_75116743_75116861	0.151225	0	0	1	1	JPT1	1.23875	3.1078e-16	-51420	0.54	4.8e-05
chr17_75383570_75383838	-0.223487	1.27273e-07	3	5	8	SLC25A19	0.815676	1.34588e-08	94060	-0.48	0.00017
chr17_75610906_75611377	-0.210033	1.81818e-08	1	1	2	RECQL5	0.578942	0.000183295	-55812	-0.49	0.00031
chr17_75610906_75611377	-0.210033	1.81818e-08	1	1	2	TSEN54	0.570258	2.62255e-06	94846	-0.49	0.00024
chr17_75753506_75753715	-0.243088	4.44242e-06	1	0	1	RECQL5	0.578942	0.000183295	86317	-0.5	0.00019
chr17_75754308_75754593	-0.301538	2.15152e-06	1	0	1	RECQL5	0.578942	0.000183295	87119	-0.45	0.0012
chr17_76345751_76345818	0.176763	4.4303e-06	0	1	1	SPHK1	2.50146	1.64775e-08	-30766	0.45	0.00064
chr17_76375540_76375679	-0.183159	9.81818e-07	3	1	4	QRICH2	0.991834	0.00199053	67542	-0.4	0.0034
chr17_76551427_76552033	-0.195834	0	1	3	4	RHBDF2	1.06911	5.09667e-08	49637	-0.41	0.0076
chr17_76567237_76567494	-0.177489	6.06061e-09	1	3	4	RHBDF2	1.06911	5.09667e-08	65447	-0.41	0.0058
chr17_76596502_76596557	-0.230443	1.90303e-06	2	1	3	CYGB	-0.805127	0.00123405	45327	0.43	0.0032
chr17_76596502_76596557	-0.230443	1.90303e-06	2	1	3	ST6GALNAC1	-1.06156	0.0272718	-47281	0.49	0.00024
chr17_76596502_76596557	-0.230443	1.90303e-06	2	1	3	PRCD	-0.977215	0.000146905	68916	0.42	0.0049
chr17_76672564_76673071	-0.201541	0	0	1	1	ST6GALNAC1	-1.06156	0.0272718	28726	0.39	0.0088
chr17_78180212_78180374	0.153141	3.15152e-07	0	2	2	TMC8	-1.32582	2.35182e-06	49442	-0.47	0.00052
chr17_78325723_78326248	-0.189032	9.57576e-07	0	1	1	PGS1	0.627135	1.93254e-07	-52392	-0.51	5.1e-05
chr17_78334112_78335306	-0.240627	1e-06	1	0	1	PGS1	0.627135	1.93254e-07	-43334	-0.42	0.0015
chr17_78337901_78338220	-0.241569	4.1697e-06	0	1	1	PGS1	0.627135	1.93254e-07	-40420	-0.42	0.0015
chr17_78344672_78345123	-0.212437	1.05455e-06	0	1	1	PGS1	0.627135	1.93254e-07	-33517	-0.37	0.0066
chr17_78345328_78345554	-0.198328	3.57576e-07	0	1	1	PGS1	0.627135	1.93254e-07	-33086	-0.45	0.00057
chr17_78345871_78346373	-0.239459	2.42424e-08	0	1	1	PGS1	0.627135	1.93254e-07	-32267	-0.46	0.0003
chr17_78366164_78367040	-0.259628	2.01212e-06	0	1	1	PGS1	0.627135	1.93254e-07	-11600	-0.47	0.00028
chr17_78910149_78910642	-0.238805	6.54545e-07	0	3	3	USP36	0.527186	1.60137e-05	68708	-0.39	0.0065
chr17_78917424_78917847	-0.241506	4.56364e-06	0	2	2	USP36	0.527186	1.60137e-05	75983	-0.41	0.0038
chr17_78918263_78918649	-0.260669	1.41212e-06	0	1	1	USP36	0.527186	1.60137e-05	76822	-0.38	0.009
chr17_79115635_79116140	-0.33347	4.66667e-07	0	1	1	C1QTNF1	-1.06907	0.00678397	92821	0.57	2.8e-06
chr17_79740112_79740330	-0.2062	2.7697e-06	1	0	1	CBX8	1.10964	2.0147e-12	-61353	-0.57	4.4e-06
chr17_79740112_79740330	-0.2062	2.7697e-06	1	0	1	CBX4	1.07674	1.01776e-09	-99099	-0.45	0.00068
chr17_79822448_79822597	-0.187046	6.12121e-07	1	0	1	CBX4	1.07674	1.01776e-09	-16832	-0.48	0.00024
chr17_79822448_79822597	-0.187046	6.12121e-07	1	0	1	CBX8	1.10964	2.0147e-12	20765	-0.55	1e-05
chr17_79833255_79833757	-0.164374	8.48485e-08	2	1	3	CBX4	1.07674	1.01776e-09	-5672	-0.6	6.9e-07
chr17_79833255_79833757	-0.164374	8.48485e-08	2	1	3	CBX8	1.10964	2.0147e-12	31572	-0.59	8.1e-07
chr17_79932009_79932661	-0.213538	0	2	2	4	CBX4	1.07674	1.01776e-09	92580	-0.6	3.6e-07
chr17_79986436_79986759	-0.198583	5e-06	2	1	3	TBC1D16	1.47968	9.14617e-16	-49089	-0.57	2.4e-06
chr17_79987193_79988072	-0.228676	8.48485e-08	3	5	8	TBC1D16	1.47968	9.14617e-16	-47776	-0.53	2.4e-05
chr17_79988800_79988962	-0.17998	3.12727e-06	3	5	8	TBC1D16	1.47968	9.14617e-16	-46886	-0.41	0.0019
chr17_79989171_79989497	-0.161852	2.42424e-08	3	4	7	TBC1D16	1.47968	9.14617e-16	-46351	-0.67	0
chr17_79989991_79991335	-0.215181	0	3	5	8	TBC1D16	1.47968	9.14617e-16	-44513	-0.7	0
chr17_79992831_79993488	-0.224913	5.45455e-08	2	3	5	TBC1D16	1.47968	9.14617e-16	-42360	-0.65	3e-08
chr17_80029945_80030282	-0.155949	5.45455e-08	2	3	5	TBC1D16	1.47968	9.14617e-16	-5566	-0.57	3.1e-06
chr17_80031229_80031337	-0.19833	1.33333e-07	2	1	3	TBC1D16	1.47968	9.14617e-16	-4511	-0.51	5.6e-05
chr17_80186792_80187414	-0.247916	3.0303e-08	1	0	1	SLC26A11	0.646358	9.88696e-06	-32285	-0.58	5.9e-06
chr17_80186792_80187414	-0.247916	3.0303e-08	1	0	1	AC087741.3	1.31542	1.51398e-06	39542	-0.49	0.00041
chr17_80186792_80187414	-0.247916	3.0303e-08	1	0	1	EIF4A3	0.679883	4.91745e-17	39609	-0.67	0
chr17_81001031_81001207	-0.205286	3.50303e-06	0	1	1	BAIAP2-DT	0.547502	0.000877435	-33674	-0.4	0.0025
chr17_81019521_81020093	-0.233189	7.39394e-07	0	1	1	BAIAP2-DT	0.547502	0.000877435	-14788	-0.42	0.0014
chr17_81130567_81131422	-0.199794	1.18182e-06	0	1	1	CEP131	1.42115	2.39109e-19	-91577	-0.64	6e-08
chr17_81130567_81131422	-0.199794	1.18182e-06	0	1	1	BAIAP2-DT	0.547502	0.000877435	95686	-0.5	0.00011
chr17_81131719_81132884	-0.181442	9.33333e-07	0	1	1	CEP131	1.42115	2.39109e-19	-90115	-0.66	1.4e-08
chr17_81131719_81132884	-0.181442	9.33333e-07	0	1	1	BAIAP2-DT	0.547502	0.000877435	96838	-0.47	0.00038
chr17_81854562_81855081	0.162378	0	0	1	1	MCRIP1	0.580428	0.000907025	21260	0.52	0.00017
chr17_81854562_81855081	0.162378	0	0	1	1	MAFG	0.980191	3.10304e-07	-72633	0.46	0.002
chr17_81854562_81855081	0.162378	0	0	1	1	MAFG-DT	3.02544	3.42431e-28	-72748	0.53	0.00012
chr17_81918661_81919063	-0.175634	3.79394e-06	0	1	1	MAFG-DT	3.02544	3.42431e-28	-8766	-0.43	0.007
chr17_82152640_82152891	0.225213	1.49091e-06	0	1	1	SLC16A3	2.21027	6.8813e-10	-75506	0.47	0.00064
chr17_82204853_82205685	-0.183862	3.63636e-08	0	1	1	SLC16A3	2.21027	6.8813e-10	-22712	-0.41	0.0051
chr17_82204853_82205685	-0.183862	3.63636e-08	0	1	1	CSNK1D	0.546384	8.35947e-08	-68046	-0.54	3e-05
chr17_82235557_82236323	-0.204468	8.48485e-08	1	2	3	SLC16A3	2.21027	6.8813e-10	7160	-0.45	0.002
chr17_82235557_82236323	-0.204468	8.48485e-08	1	2	3	CSNK1D	0.546384	8.35947e-08	-37408	-0.61	1.4e-06
chr17_82236700_82237087	-0.205267	0	1	2	3	CSNK1D	0.546384	8.35947e-08	-36644	-0.47	0.00076
chr17_82268815_82269137	-0.174549	5.45455e-08	0	3	3	CSNK1D	0.546384	8.35947e-08	-4594	-0.45	0.0012
chr17_82294250_82294879	-0.221591	6.06061e-09	2	2	4	CSNK1D	0.546384	8.35947e-08	20519	-0.4	0.0086
chr17_82327639_82327900	-0.205954	8.30303e-07	0	1	1	CSNK1D	0.546384	8.35947e-08	53908	-0.45	0.0019
chr17_82328404_82328615	-0.210819	1.29697e-06	2	2	4	CSNK1D	0.546384	8.35947e-08	54673	-0.4	0.0099
chr17_82551912_82552260	0.22624	6.06061e-09	1	1	2	NARF	1.06991	9.12272e-15	93732	0.53	4.7e-05
chr17_82963191_82963428	0.321766	1.45455e-07	0	1	1	B3GNTL1	0.852844	6.00068e-07	-88382	0.5	6e-05
chr17_83082102_83082368	-0.252319	1.27273e-07	0	2	2	B3GNTL1	0.852844	6.00068e-07	30292	-0.58	2.2e-06
chr17_83082743_83082901	-0.216911	4.40606e-06	0	1	1	B3GNTL1	0.852844	6.00068e-07	30933	-0.47	0.00029
chr17_83084946_83085313	-0.235627	1.33939e-06	0	1	1	B3GNTL1	0.852844	6.00068e-07	33136	-0.41	0.0018
chr17_83086139_83086391	-0.273253	7.21212e-07	0	1	1	B3GNTL1	0.852844	6.00068e-07	34329	-0.51	4.2e-05
chr18_3623355_3623585	-0.24762	5.67879e-06	3	3	6	DLGAP1-AS1	0.711162	0.00313747	29623	-0.56	2.6e-06
chr18_3652594_3652976	-0.235214	3.45455e-07	2	3	5	DLGAP1-AS1	0.711162	0.00313747	58862	-0.47	0.00018
chr18_23507791_23508123	0.181336	6.06061e-09	0	2	2	NPC1	1.14532	8.16283e-15	-78775	0.65	4e-08
chr18_23579746_23579844	-0.155439	7.39394e-07	1	3	4	NPC1	1.14532	8.16283e-15	-7054	-0.47	0.00026
chr18_23618161_23618534	-0.21298	1.15152e-07	1	1	2	NPC1	1.14532	8.16283e-15	31263	-0.52	3.6e-05
chr18_23629896_23630245	-0.191716	1e-06	0	1	1	NPC1	1.14532	8.16283e-15	42998	-0.41	0.0022
chr18_24234244_24235064	-0.190721	3.0303e-08	1	1	2	AC090772.3	2.89793	8.91077e-06	72033	-0.4	0.003
chr18_39344533_39344768	-0.24957	5.53333e-06	1	0	1	AC011139.1	-5.83251	4.8766e-35	30293	0.47	0.00014
chr18_42242934_42243175	-0.239488	3.15152e-07	1	0	1	LINC00907	-3.71107	2.11477e-12	83651	0.5	2.6e-05
chr18_45588537_45588839	-0.2385	1.57576e-07	0	1	1	SLC14A1	-1.91779	2.82413e-11	-98186	0.41	0.0008
chr18_45590277_45590579	-0.265864	2.24242e-07	0	1	1	SLC14A1	-1.91779	2.82413e-11	-96446	0.43	0.00031
[truncated: 1,040 more rows]

## Sheet: Table S2.1.4
Table S2.1.4 Summarized information of high-confidence genic enhancer-like DMR-DEGs
DMR.ID	Delta.Methy	gene_name	DEG.LFC	DEG.padj	distance	MethyandGene.rho	MethyandGene.padj	pairType	LIHC.Replication
chr13_110206078_110206748	-0.308316	COL4A2	1.84134	2.14942e-10	-99064	-0.43	0.00037	HypoUp	Type II failure
chr13_110258981_110260929	-0.320177	COL4A2	1.84134	2.14942e-10	-44883	-0.41	0.0013	HypoUp	Type I failure
chr13_110301038_110302613	-0.348298	COL4A2	1.84134	2.14942e-10	-3199	-0.38	0.0036	HypoUp	Type I failure
chr19_3423245_3424523	0.300959	SMIM24	-2.4667	8.18585e-06	-56019	-0.39	0.0048	HyperDown	Type I failure
chr5_151251276_151251871	-0.25858	GM2A	0.925241	5.37575e-13	39126	-0.47	0.00028	HypoUp	Type I failure
chr8_96589537_96590620	-0.239121	SDC2	0.510005	0.00542679	96186	-0.65	1.3e-08	HypoUp	Type II failure
chr1_24100881_24101396	-0.237111	IL22RA1	1.39676	7.07447e-07	-41725	-0.45	0.00048	HypoUp	Type I failure
chr1_26284867_26285814	-0.206129	CEP85	1.00785	3.63492e-09	50667	-0.6	1.5e-06	HypoUp	Type II failure
chr1_155300866_155301173	-0.215616	GBAP1	1.52816	7.21659e-10	73444	-0.45	0.0027	HypoUp	Replicated
chr11_65844344_65844737	-0.219561	FIBP	0.579343	9.39705e-09	-43802	-0.64	2e-07	HypoUp	Type I failure
chr12_113206521_113206857	-0.191051	IQCD	1.80926	7.42758e-11	-14237	-0.5	0.00015	HypoUp	Type I failure
chr13_110232653_110233057	-0.299988	COL4A2	1.84134	2.14942e-10	-72755	-0.38	0.004	HypoUp	Replicated
chr13_110387831_110390493	-0.291344	COL4A2	1.84134	2.14942e-10	82019	-0.38	0.0032	HypoUp	Replicated
chr13_110397302_110398009	-0.199015	COL4A2	1.84134	2.14942e-10	91490	-0.39	0.0028	HypoUp	Type I failure
chr14_22965804_22966761	-0.238748	LRP10	0.636404	0.000603621	94191	-0.45	0.0025	HypoUp	Type I failure
chr19_3428124_3428792	0.222965	SMIM24	-2.4667	8.18585e-06	-51750	-0.41	0.0024	HyperDown	Type I failure
chr3_124858896_124859415	-0.153646	MUC13	6.71956	4.31959e-39	-94404	-0.52	1.7e-05	HypoUp	Type I failure
chr1_229274083_229274309	-0.28783	CCSAP	1.064	5.57556e-14	-68985	-0.55	8.1e-06	HypoUp	Type I failure
chr11_11993904_11994342	-0.269861	DKK3	1.11638	0.00173059	-15427	-0.37	0.0081	HypoUp	Type II failure
chr12_56682811_56683952	-0.279685	PTGES3	0.582254	3.59774e-08	-4456	-0.7	0	HypoUp	Type I failure
chr5_172871061_172871507	0.293174	DUSP1	-2.15313	4.16839e-16	99866	-0.42	0.0022	HyperDown	Type I failure
chr1_25686093_25686578	0.212061	MAN1C1	-1.70228	1.72445e-11	68625	-0.39	0.0012	HyperDown	Type I failure
chr1_62438722_62439253	-0.225708	USP1	0.65334	1.0856e-09	2425	-0.7	0	HypoUp	Type I failure
chr1_115711019_115711931	-0.248058	VANGL1	0.630842	4.11712e-05	69066	-0.51	3e-05	HypoUp	Type I failure
chr1_155300866_155301173	-0.215616	RUSC1	1.09928	1.94644e-16	-19723	-0.45	0.0022	HypoUp	Replicated
chr1_159846077_159846654	-0.231358	TAGLN2	1.03864	6.02055e-11	-79078	-0.4	0.0043	HypoUp	Type I failure
chr1_168445503_168446212	-0.167709	XCL2	-1.75038	2.36452e-10	-97785	0.45	0.0004	HypoDown	Type I failure
chr1_172449772_172450751	-0.203438	C1orf105	0.830341	0.0389185	29084	-0.42	0.0014	HypoUp	Replicated
chr1_172449772_172450751	-0.203438	SUCO	1.39799	2.61725e-31	-81598	-0.61	2.7e-07	HypoUp	Type II failure
chr1_172453297_172453700	-0.234037	C1orf105	0.830341	0.0389185	32609	-0.5	6.3e-05	HypoUp	Type I failure
chr1_172453297_172453700	-0.234037	SUCO	1.39799	2.61725e-31	-78649	-0.47	0.00026	HypoUp	Type I failure
chr1_201221486_201222815	-0.155344	TMEM9	0.852606	9.73265e-10	49912	-0.68	0	HypoUp	Type I failure
chr1_223705739_223706519	-0.178756	CAPN2	0.923044	4.16277e-07	4146	-0.46	0.00022	HypoUp	Replicated
chr1_223705739_223706519	-0.178756	CAPN8	1.36332	0.000468053	40005	-0.43	0.00076	HypoUp	Type II failure
chr1_223710468_223711085	-0.248989	CAPN2	0.923044	4.16277e-07	8875	-0.43	0.0008	HypoUp	Type I failure
chr1_223710468_223711085	-0.248989	CAPN8	1.36332	0.000468053	44734	-0.36	0.0062	HypoUp	Type I failure
chr1_241615340_241616123	-0.218989	CHML	1.85712	6.2289e-23	-24131	-0.48	0.00028	HypoUp	Type I failure
chr10_25060294_25060708	-0.183654	ENKUR	0.959006	0.00936916	-1571	-0.5	4.4e-05	HypoUp	Type I failure
chr11_65844344_65844737	-0.219561	CFL1	0.608728	2.7263e-08	-17289	-0.66	2.9e-08	HypoUp	Type I failure
chr11_78068645_78069451	0.166448	ALG8	0.597832	1.12417e-06	-70209	0.4	0.0059	HyperUp	Type I failure
chr12_56685431_56686203	-0.194178	PTGES3	0.582254	3.59774e-08	-2205	-0.61	9.9e-07	HypoUp	Type I failure
chr12_105280924_105281622	-0.178715	APPL2	0.597622	1.3955e-08	44686	-0.54	1.1e-05	HypoUp	Type I failure
chr12_105280924_105281622	-0.178715	C12orf75	1.94619	3.18946e-10	45634	-0.49	0.00011	HypoUp	Type I failure
chr15_60374664_60375221	-0.212841	ANXA2	1.7508	7.53432e-12	-27662	-0.71	0	HypoUp	Type I failure
chr15_60393682_60394657	-0.191683	ANXA2	1.7508	7.53432e-12	-8226	-0.67	0	HypoUp	Type I failure
chr17_31475337_31477007	-0.242407	RAB11FIP4	1.74797	3.29569e-21	83713	-0.61	2.6e-07	HypoUp	Replicated
chr17_31487052_31487396	-0.185356	RAB11FIP4	1.74797	3.29569e-21	95428	-0.58	1.5e-06	HypoUp	Type I failure
chr17_76551427_76552033	-0.195834	ST6GALNAC2	1.61996	1.65906e-07	-34923	-0.45	0.002	HypoUp	Type I failure
chr17_78920596_78921058	-0.19728	CANT1	0.955404	7.5966e-22	-88809	-0.49	0.00023	HypoUp	Type I failure
chr17_82235557_82236323	-0.204468	SECTM1	1.04262	0.000654463	-97751	-0.42	0.0047	HypoUp	Type II failure
chr18_57798637_57799209	-0.184844	ATP8B1	0.751798	2.50001e-05	-4106	-0.46	0.00014	HypoUp	Replicated
chr19_8574824_8575326	-0.231143	PRAM1	-1.88066	3.83221e-12	71712	0.39	0.006	HypoDown	Type I failure
chr19_16675693_16677050	-0.23267	TMEM38A	0.501887	0.0192756	14566	-0.61	7.9e-07	HypoUp	Type I failure
chr19_54232090_54233169	-0.234305	CNOT3	0.67084	1.30079e-07	94373	-0.58	5.8e-06	HypoUp	Type I failure
chr2_9335284_9335721	-0.193355	ITGB1BP1	0.645361	4.58845e-08	-87826	-0.48	0.00013	HypoUp	Type I failure
chr2_27302663_27303122	-0.160167	CAD	1.26123	2.54084e-13	85273	-0.45	0.0022	HypoUp	Type I failure
chr22_30566106_30566670	-0.220328	SLC35E4	1.58205	1.13469e-10	-68982	-0.42	0.0048	HypoUp	Replicated
chr3_50335385_50336446	-0.203609	CYB561D2	0.5304	0.000133465	-14249	-0.65	8e-08	HypoUp	Replicated
chr3_52210590_52211111	-0.193067	POC1A	1.38235	4.86344e-21	55900	-0.6	1.4e-06	HypoUp	Type I failure
chr3_61564214_61565013	0.333024	PTPRG	1.06181	1.29529e-08	2645	0.44	0.00028	HyperUp	Type II failure
chr7_5439512_5440084	-0.22928	TNRC18	0.67109	3.72693e-05	14098	-0.44	0.0017	HypoUp	Type I failure
chr7_20358622_20359340	-0.341132	ITGB8	-1.73214	0.00016738	27920	0.71	0	HypoDown	Type I failure
chr7_56032382_56033669	-0.239618	PSPH	1.57503	6.01912e-17	-17935	-0.77	0	HypoUp	Type I failure
chr7_143393386_143393930	-0.226202	EPHA1	0.760353	0.0254507	-14962	-0.5	0.00012	HypoUp	Type I failure
chr8_141289203_141289773	-0.180039	SLC45A4	2.1889	1.73952e-13	-18532	-0.46	0.0002	HypoUp	Type II failure
chr9_98862188_98863173	-0.238115	COL15A1	3.81263	9.07347e-32	-80006	-0.47	0.0003	HypoUp	Type I failure
chr9_130499511_130499846	-0.202484	ASS1	-2.73747	6.99645e-25	54582	0.52	2.6e-05	HypoDown	Type I failure
chrX_40167792_40168279	0.31527	BCOR	0.605515	4.15351e-06	-9050	0.35	0.004	HyperUp	Type I failure
chr1_1331401_1332905	-0.283147	PUSL1	0.66948	2.85097e-06	22834	-0.69	0	HypoUp	Replicated
chr1_1331401_1332905	-0.283147	AL391244.1	2.04759	0.000128423	-66617	-0.65	1.2e-07	HypoUp	Type II failure
chr1_11839346_11840760	0.225539	PLOD1	0.99278	1.04665e-05	-93445	0.42	0.0028	HyperUp	Replicated
chr1_110629497_110630457	-0.268969	KCNA3	-0.999094	0.0104625	-44576	0.49	9e-05	HypoDown	Type I failure
chr1_155636532_155638157	-0.304576	ASH1L	0.643228	4.61427e-08	73725	-0.47	0.00057	HypoUp	Type I failure
chr1_175072742_175073349	-0.275398	CACYBP	0.913697	1.61598e-10	73579	-0.63	1.3e-07	HypoUp	Replicated
chr1_203282192_203282604	-0.325601	LINC01136	2.88925	1.3059e-07	-22705	-0.52	4.4e-05	HypoUp	Type I failure
chr1_230824728_230826082	-0.234496	C1orf198	1.27958	2.13546e-10	-43507	-0.45	0.00016	HypoUp	Replicated
chr1_244065510_244065852	-0.25164	ZBTB18	0.6266	2.73421e-05	16571	-0.47	0.00023	HypoUp	Type I failure
chr10_127978276_127979742	-0.323901	CLRN3	-2.07097	4.60059e-07	85329	0.43	0.0009	HypoDown	Type I failure
[truncated: 329 more rows]

## Sheet: Table S2.1.5
Table S2.1.5 Summarized information of intergenic enhancer-like DMR-DEGs
[truncated: 1,947 more rows]

[truncated: 2 more sheets: Table S2.1.6, Table S2.2]
